# Supplementary material for: Palladium-catalyzed dearomatizing 2,5-alkoxyarylation of furan rings: diastereospecific access to spirooxindoles
Source: Royal Society of Chemistry journal article supplement (doi:10.1039/c6cc04298h), 2016-01-01
Supplement: c6cc04298h1.pdf [file c6cc04298h1.pdf]

# Palladium-Catalyzed Dearomatizing 2,5-Alkoxyarylation of Furan Rings: Diastereospecific Access to Spirooxindoles

Jianchao Liu,<sup>a</sup> Xiaobing Xu,<sup>a</sup> Jiuyi Li,<sup>a</sup> Bo Liu,<sup>b</sup> Huanfeng Jiang<sup>a</sup> and Biaolin Yin\*<sup>a</sup>

<sup>a</sup>School of Chemistry and Chemical Engineering, South China University of Technology, Guangzhou, Guangdong, 510640, China, E-mail: [byin@scut.edu.cn](mailto:byin@scut.edu.cn).

<sup>b</sup>Guangdong Provincial Academy of Chinese Medical Science, Guangzhou, 510006, China, E-mail: doctliu@263.net

| Content                                               | Page   |
|-------------------------------------------------------|--------|
| General experimental details                          | 2      |
| General procedure for the preparation of <b>1</b>     | 3      |
| General procedure for the preparation of <b>2</b>     | 4      |
| Details of control experiments                        | 4-5    |
| General procedure for the preparation of <b>12</b>    | 5-6    |
| Optimization of the reaction condition for <b>13a</b> | 6      |
| General procedure for the preparation of <b>13</b>    | 7      |
| Characterization of all the new compounds             | 8-38   |
| X-Ray crystal data of <b>2r</b> , <b>13h</b>          | 39-40  |
| Spectra of all the new compounds                      | 41-111 |

## General Experimental Details

IR spectra were recorded with FT-IR as a thin film or using KBr pellets and are expressed in  $\text{cm}^{-1}$ .  $^1\text{H}$  (400 MHz) and  $^{13}\text{C}$  (100 MHz) NMR spectra were recorded using  $\text{CDCl}_3$  as a solvent. Chemical shifts are reported in ppm downfield to tetramethylsilane. Coupling constants are reported and expressed in Hz; splitting patterns are designated as s (singlet), d (doublet), t (triplet), q (quartet), m (multiplet), dd (double doublet), dt (double triplet), dq (double quartet). Infrared (IR) spectra were obtained on a Bruker Vector 22 spectrometer. Mass spectra were obtained from high resolution ESI mass spectrometer. All reactions were carried out using freshly distilled and dry solvents. Column chromatography was performed over silica gel (100-200 Mesh) using petroleum ether and ethyl acetate as the eluent.

## General procedure for the preparation of **1**

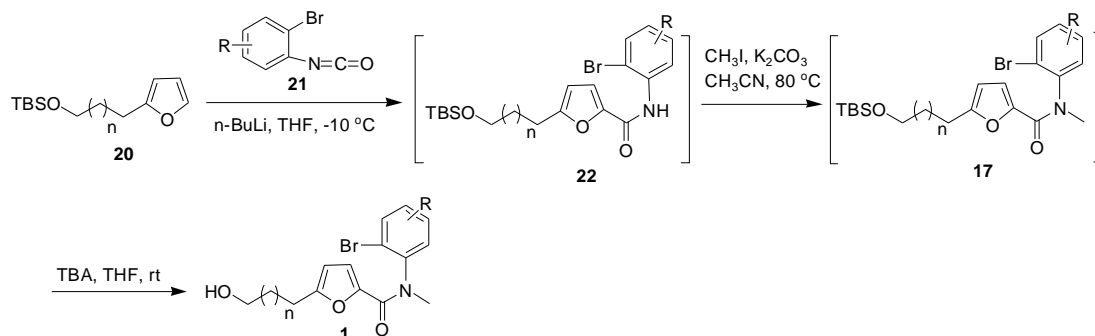

To a solution of **20** (3 mmol) in anhydrous THF (5 mL), at -10 °C under nitrogen atmosphere, was added a solution of *n*-BuLi (2.1 mL, 1.6 M in hexane, 3.3 mmol). The solution was stirred for 1 h at the same temperature and then a solution of **21** (3.3 mmol) in anhydrous THF (2 mL) was added dropwise. The reaction mixture was stirred for additional 30 mins, then was quenched with saturated aq. NH<sub>4</sub>Cl (4 mL). The organic solvent was evaporated under reduced pressure and the aqueous layer was extracted with ethyl acetate (3 × 5 mL). The combined organic layers were washed with saturated brine, dried over sodium sulfate, concentrated under reduced pressure to provide the crude product which was submitted to the next step without further purification.

The mixture of above-made crude product **22**, CH<sub>3</sub>I (10 mmol), K<sub>2</sub>CO<sub>3</sub> (9 mmol) and CH<sub>3</sub>CN (5 mL) was stirred at 80 °C under nitrogen atmosphere for about 8 h. The reaction mixture was filtered and the filtrate was concentrated to give the residue **17** which was submitted to the next step without further purification.

To the solution of the above-made residue in THF (5 ml) was added TBAF (3.6 mL, 1 M in THF). The reaction was stirred at room temperature about 30 mins. H<sub>2</sub>O (5 mL) was added to the reaction mixture and THF was removed under reduced pressure. The resulting mixture was extracted with AcOEt (3 × 5 mL). The combined organic extracts were washed with brine, dried over Na<sub>2</sub>SO<sub>4</sub>, filtered and concentrated. The residue was purified by flash chromatography on a silica gel (using petroleum ether/ethyl acetate = 1:1 as the eluent) to give product **1**.

## General procedure for the preparation of **2**

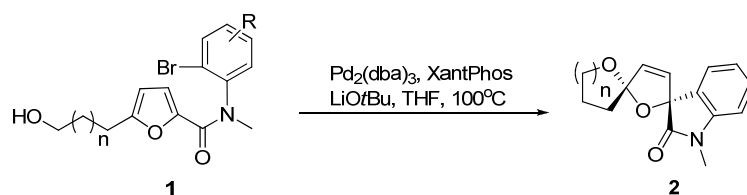

To a stirred solution of **1** (0.3 mmol) in THF (3 mL) were added LiOtBu (48 mg, 0.6 mmol),  $\text{Pd}_2(\text{dba})_3$  (14 mg, 0.015 mmol, 5 mol%), and XantPhos (17.3 mg 0.03 mmol, 10 mol %) subsequently in a Schlenk flask under nitrogen atmosphere. The reaction mixture was heated at  $100^\circ\text{C}$  until the disappearance of the starting material according to the TLC.  $\text{H}_2\text{O}$  (5 mL) was added to the reaction mixture. The resulting mixture was extracted with AcOEt ( $3 \times 5$  mL). The combined organic extracts were washed with brine, dried over  $\text{Na}_2\text{SO}_4$ , filtered and concentrated. The residue was purified by flash chromatography on a silica gel (using petroleum ether/ethyl acetate = 3:1 as the eluent) to give product **2**.

## Details of Control Experiments

### Preparation of **18a**

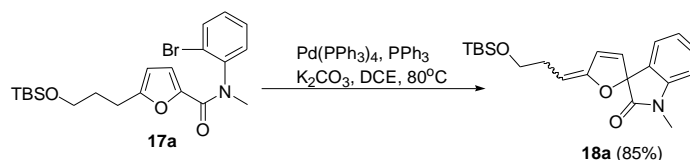

To a stirred solution of **17a** (0.3 mmol) in DCE (3 mL) were added  $\text{K}_2\text{CO}_3$  (83 mg, 0.6 mmol),  $\text{Pd}(\text{PPh}_3)_4$  (17 mg, 0.015 mmol, 5 mol %), and  $\text{PPh}_3$  (8 mg, 0.03 mmol, 10 mol %) subsequently in a Schlenk flask under nitrogen atmosphere. The reaction was heated at  $80^\circ\text{C}$  until the disappearance of the starting material according to the TLC.  $\text{H}_2\text{O}$  (5 mL) was added to the reaction and the resulting mixture was extracted with AcOEt ( $3 \times 5$  mL). The combined organic extracts were washed with brine, dried over  $\text{Na}_2\text{SO}_4$ , filtered and concentrated. The residue was purified by flash chromatography on a silica gel (using petroleum ether/ethyl acetate = 15:1 as the eluent) to give product **18a** (94 mg, 85%).

## Preparation of 19a

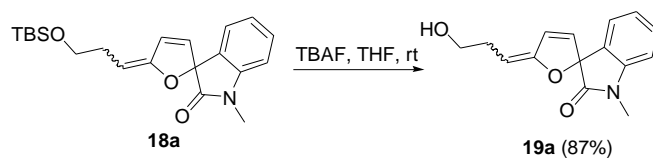

To a solution of **18a** (0.25 mmol) in THF (3 mL) were added TBAF (0.3 ml, 1 M in THF). The reaction mixture was stirred at room temperature until the disappearance of the starting material according to the TLC. H<sub>2</sub>O (5 mL) was added to the reaction mixture. The resulting mixture was extracted with AcOEt (3× 5 mL). The combined organic extracts were washed with brine, dried over Na<sub>2</sub>SO<sub>4</sub>, filtered and concentrated. The residue was purified by flash chromatography on a silica gel (using petroleum ether/ethyl acetate = 1:1 as the eluent) to give product **19a** (55 mg, 87%).

## Transformation of 19a into 2a

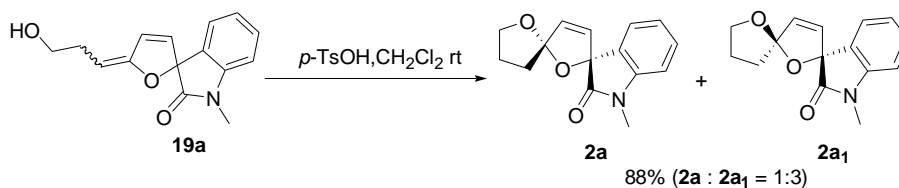

To a solution of **19a** (0.2 mmol) in CH<sub>2</sub>Cl<sub>2</sub> (3 mL) were added *p*-TsOH (68 mg, 0.4 mmol). The reaction mixture was stirred at room temperature about 30 mins until the disappearance of the starting material according to the TLC. H<sub>2</sub>O (5 mL) was added to the reaction and the resulting mixture was extracted with CH<sub>2</sub>Cl<sub>2</sub> (3×3 mL). The combined organic extracts were washed with brine, dried over Na<sub>2</sub>SO<sub>4</sub>, filtered and concentrated. The residue was purified by flash chromatography on a silica gel (using petroleum ether/ethyl acetate = 3:1 as the eluent) to give product **2** (44 mg, 88%, **2a**:**2a<sub>1</sub>** = 1:3).

## Typical procedure for the preparation of 12

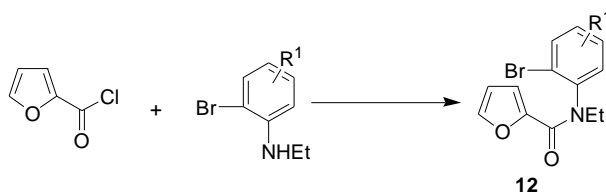

To the mixture of aniline (6 mmol) in dry CH<sub>2</sub>Cl<sub>2</sub> (20 mL) was added furan-2-carbonyl chloride

(1.16 g, 9 mmol) dropwise at 0 °C. After addition, the mixture was warmed to room temperature and stirred until aniline was disappear according to the TLC. H<sub>2</sub>O (30 mL) was added to the reaction mixture, and the organic phase was separated. The aqueous phase was extracted with CH<sub>2</sub>Cl<sub>2</sub> (3 x 10 mL), and the combined organic phase was washed with brine and dried over anhydrous Na<sub>2</sub>SO<sub>4</sub>. The filtrate was concentrated, and the residue was purified by flash chromatography on a silica gel (using petroleum ether : ethyl acetate = 14 : 1 as the eluent) to give product **12**.

### Reaction conditions optimization for **13a**<sup>a</sup>

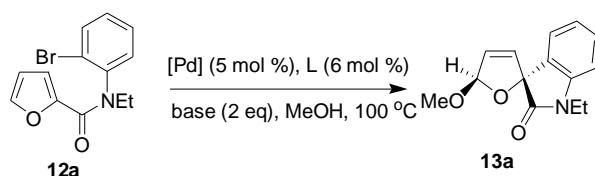

| Entry           | Pd                                                 | L                | Base                            | Yield(%)<br>b |
|-----------------|----------------------------------------------------|------------------|---------------------------------|---------------|
| 1 <sup>a</sup>  | Pd(OAc) <sub>2</sub>                               | BINAP            | Et <sub>3</sub> N               | 85            |
| 2               | Pd(PPh <sub>3</sub> ) <sub>4</sub>                 | BINAP            | Et <sub>3</sub> N               | 70            |
| 3               | Pd <sub>2</sub> (dba) <sub>3</sub>                 | BINAP            | Et <sub>3</sub> N               | 49            |
| 4               | Pd(PPh <sub>3</sub> ) <sub>2</sub> Cl <sub>2</sub> | BINAP            | Et <sub>3</sub> N               | 82            |
| 5               | Pd(MeCN) <sub>2</sub> Cl <sub>2</sub>              | BINAP            | Et <sub>3</sub> N               | 80            |
| 6               | Pd(OAc) <sub>2</sub>                               | BINAP            | K <sub>2</sub> CO <sub>3</sub>  | ND            |
| 7               | Pd(OAc) <sub>2</sub>                               | BINAP            | Cs <sub>2</sub> CO <sub>3</sub> | ND            |
| 8               | Pd(OAc) <sub>2</sub>                               | BINAP            | DBU                             | 38            |
| 9               | Pd(OAc) <sub>2</sub>                               | BINAP            | N,N-Dicyclohexymethylamine      | 61            |
| 10              | Pd(OAc) <sub>2</sub>                               | BINAP            | TMEDA                           | 68            |
| 11              | Pd(OAc) <sub>2</sub>                               | PPh <sub>3</sub> | Et <sub>3</sub> N               | 54            |
| 12              | Pd(OAc) <sub>2</sub>                               | PCy <sub>3</sub> | Et <sub>3</sub> N               | ND            |
| 13              | Pd(OAc) <sub>2</sub>                               | dppf             | Et <sub>3</sub> N               | 73            |
| 14              | Pd(OAc) <sub>2</sub>                               | Xanphos.         | Et <sub>3</sub> N               | 65            |
| 15              | Pd(OAc) <sub>2</sub>                               | Davepos.         | Et <sub>3</sub> N               | 60            |
| 16 <sup>c</sup> | Pd(OAc) <sub>2</sub>                               | BINAP            | Et <sub>3</sub> N               | 32            |
| 17 <sup>d</sup> | Pd(OAc) <sub>2</sub>                               | BINAP            | Et <sub>3</sub> N               | 35            |
| 18 <sup>e</sup> | Pd(OAc) <sub>2</sub>                               | BINAP            | Et <sub>3</sub> N               | 38            |
| 19 <sup>f</sup> | Pd(OAc) <sub>2</sub>                               | BINAP            | Et <sub>3</sub> N               | 41            |
| 20 <sup>g</sup> | Pd(OAc) <sub>2</sub>                               | BINAP            | Et <sub>3</sub> N               | 47            |

<sup>a</sup> Reaction conditions: unless otherwise noted, [Pd] (5 mol %), L (10 mol %), base ( 200 mol %), and **12a** (0.3 mmol) in MeOH (3 mL) at 100 °C under N<sub>2</sub> atmosphere for 18 h. BINAP = (±)-2,2'-bis(diphenylphosphino)-1,1'-binaphthalene; dppf = 1,1'-bis(diphenylphosphino)ferrocene; Xanphos =

4,5-bis-diphenylphosphanyl-9,9-dimethyl-9H-xanthene; Davepos = 2-dicyclohexylphosphino-2'-(N,N-dimethylamino)biphenyl. <sup>b</sup> The yield was determined by <sup>1</sup>HNMR methods using dibromomethane as an internal standard. ND = not detected. <sup>c</sup> Pd(OAc)<sub>2</sub> (5 mol %), BINAP (6 mol %), CH<sub>3</sub>OH (200 mol %) in THF (3 mL). <sup>d</sup> Pd(OAc)<sub>2</sub> (5 mol %), BINAP (6 mol %), Et<sub>3</sub>N (200 mol %), CH<sub>3</sub>OH (200 mol %) in MeCN (3 mL). <sup>e</sup> The solvent v<sub>1</sub> ( MeCN ) : v<sub>2</sub> ( CH<sub>3</sub>OH ) = 2 : 1. <sup>f</sup> The solvent v<sub>1</sub> ( MeCN ) : v<sub>2</sub> ( CH<sub>3</sub>OH ) = 1 : 1. <sup>g</sup> The solvent v<sub>1</sub> ( MeCN ) : v<sub>2</sub> ( CH<sub>3</sub>OH ) = 1 : 2.

## General procedure for the preparation of 13

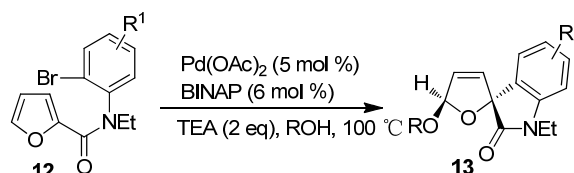

To a dried Schlenk tube were added Pd(OAc)<sub>2</sub> (4 mg, 0.015 mmol) and BINAP (13 mg 0.018 mmol) under N<sub>2</sub>, ROH (3.0 mL) was then introduced via syringe. The resulting mixture was stirred at room temperature for 1 h, after which **12** (0.3 mmol) and Et<sub>3</sub>N (0.6 mmol) were added and the tube was sealed using Teflon cap. The mixture was stirred at 100 °C for 18 h. The solvent was then removed under vacuum and the residue was purified by chromatography on silica gel, eluting with ethyl/petroleum ether 1:14 (v/v) to afford the products.

## Characterization of 1

### *N*-(2-bromophenyl)-5-(3-hydroxypropyl)-*N*-methylfuran-2-carboxamide (**1a**)

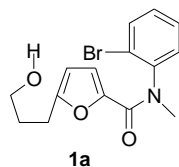

Colorless oil, (638 mg, 63% over 3 steps), IR (KBr) 3655, 3321, 3096, 2979, 1695, 1470, 1237, 1061, 973, 746 cm<sup>-1</sup>; <sup>1</sup>H NMR (400 MHz, CDCl<sub>3</sub>) δ 7.67 (d, *J* = 7.9 Hz, 1H), 7.37 (t, *J* = 7.5 Hz, 1H), 7.30 – 7.24 (m, 2H), 6.01 (s, 1H), 5.88 (s, 1H), 3.52 (t, *J* = 5.8 Hz, 2H), 3.33 (s, 3H), 2.55 (t, *J* = 6.7 Hz, 2H), 2.46 (s, 1H), 1.73 – 1.61 (m, 2H); <sup>13</sup>C NMR (100 MHz, CDCl<sub>3</sub>) δ 159.2, 158.5, 145.5, 143.2, 133.7, 130.1, 129.6, 128.7, 123.4, 117.5, 107.2, 61.3, 37.1, 30.3, 24.2; HRMS (ESI) *m/z* calcd for C<sub>15</sub>H<sub>16</sub>BrNO<sub>3</sub> [M + H]<sup>+</sup>: 338.0386; Found: 338.0386.

### *N*-(2-bromo-4-fluorophenyl)-5-(3-hydroxypropyl)-*N*-methylfuran-2-carboxamide (**1b**)

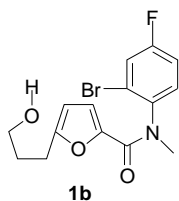

Yellow oil, (534 mg, 50% over 3 steps), IR (KBr) 3696, 3042, 2947, 1765, 1668, 1590, 1199, 967, 857, 700  $\text{cm}^{-1}$ ;  $^1\text{H}$  NMR (400 MHz,  $\text{CDCl}_3$ )  $\delta$  7.43 – 7.41 (m, 1H), 7.28 (t,  $J = 7.1$  Hz, 1H), 7.11 – 7.08 (m, 1H), 6.15 (s, 1H), 5.92 (s, 1H), 3.55 (t,  $J = 6.1$  Hz, 2H), 3.32 (s, 3H), 2.57 (t,  $J = 7.0$  Hz, 2H), 2.15 (s, 1H), 1.77 – 1.64 (m, 2H);  $^{13}\text{C}$  NMR (100 MHz,  $\text{CDCl}_3$ )  $\delta$  161.4, 159.2, 158.6, 145.5, 139.6, 130.9, 124.1, 120.8, 117.8, 115.7, 107.3, 61.4, 37.1, 30.3, 24.3; HRMS (ESI)  $m/z$  calcd for  $\text{C}_{15}\text{H}_{15}\text{BrFNO}_3$ :  $[\text{M} + \text{H}]^+$ : 356.0292; Found: 356.0295.

***N*-(2-bromo-5-fluorophenyl)-5-(3-hydroxypropyl)-*N*-methylfuran-2-carboxamide (1c)**

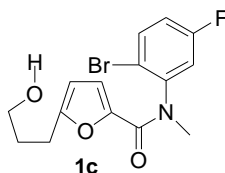

Colorless oil, (596 mg, 56% over 3 steps), IR (KBr) 3655, 3434, 2946, 1738, 1586, 1357, 1184, 861, 812, 746  $\text{cm}^{-1}$ ;  $^1\text{H}$  NMR (400 MHz,  $\text{CDCl}_3$ )  $\delta$  7.66 – 7.62 (m, 1H), 7.08 – 7.01 (m, 2H), 6.35 (s, 1H), 5.97 (s, 1H), 3.57 (t,  $J = 6.2$  Hz, 2H), 3.36 (s, 3H), 2.58 (t,  $J = 7.2$  Hz, 2H), 1.74 – 1.67 (m, 2H), 1.63 (s, 1H);  $^{13}\text{C}$  NMR (100 MHz,  $\text{CDCl}_3$ )  $\delta$  163.3, 160.8, 159.0, 158.8, 145.3, 144.3, 134.3, 118.1, 117.3, 117.0, 107.4, 61.2, 36.9, 30.3, 24.3; HRMS (ESI)  $m/z$  calcd for  $\text{C}_{15}\text{H}_{15}\text{BrFNO}_3$ :  $[\text{M} + \text{Na}]^+$ : 378.0112; Found: 378.0115.

***N*-(2-bromo-4-methylphenyl)-5-(3-hydroxypropyl)-*N*-methylfuran-2-carboxamide (1d)**

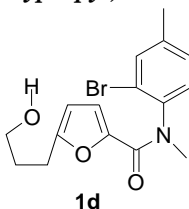

Colorless oil, (548 mg, 49% over 3 steps), IR (KBr) 3321, 3042, 2946, 1636, 1429, 1266, 971, 744  $\text{cm}^{-1}$ ;  $^1\text{H}$  NMR (400 MHz,  $\text{CDCl}_3$ )  $\delta$  7.49 (s, 1H), 7.17 (s, 2H), 5.90 (d,  $J = 5.3$  Hz, 1H), 5.88 (d,  $J = 5.3$  Hz, 1H), 3.55 (t,  $J = 5.7$  Hz, 2H), 3.31 (s, 3H), 2.60 (t,  $J = 7.1$  Hz, 2H), 2.39 (s, 3H), 2.20 (s, 1H), 1.77 – 1.66 (m, 2H);  $^{13}\text{C}$  NMR (100 MHz,  $\text{CDCl}_3$ )  $\delta$  159.4, 158.4, 145.5, 140.4, 140.2, 134.0,



129.5, 129.4, 123.0, 117.3, 107.2, 61.4, 37.0, 30.4, 24.2, 20.8; HRMS (ESI)  $m/z$  calcd for  $C_{16}H_{18}BrNO_3$ :  $[M + H]^+$  : 374.0362; Found: 374.0366.

***N*-(2-bromo-5-methylphenyl)-5-(3-hydroxypropyl)-*N*-methylfuran-2-carboxamide (1e)**

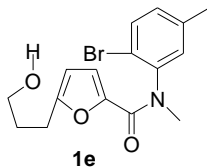

Colorless oil, (600 mg, 57% over 3 steps), IR (KBr) 3301, 2946, 1677, 1589, 1471, 1071, 958, 860, 763, 699  $cm^{-1}$ ;  $^1H$  NMR (400 MHz,  $CDCl_3$ )  $\delta$  7.53 (d,  $J = 8.1$  Hz, 1H), 7.12 (s, 1H), 7.08 (d,  $J = 8.1$  Hz, 1H), 5.98 (s, 1H), 5.89 (s, 1H), 3.55 (t,  $J = 6.1$  Hz, 2H), 3.33 (s, 3H), 2.59 (t,  $J = 7.2$  Hz, 2H), 2.33 (s, 3H), 1.76 – 1.66 (m, 2H);  $^{13}C$  NMR (100 MHz,  $CDCl_3$ )  $\delta$  159.2, 158.4, 145.6, 142.7, 139.1, 133.2, 130.5, 130.4, 119.9, 117.4, 107.2, 61.4, 37.1, 30.4, 24.2, 20.7; HRMS (ESI)  $m/z$  calcd for  $C_{16}H_{18}BrNO_3$ :  $[M + H]^+$  : 352.0543; Found: 352.0549.

***N*-(2-bromo-4,6-dimethylphenyl)-5-(3-hydroxypropyl)-*N*-methylfuran-2-carboxamide (1f)**

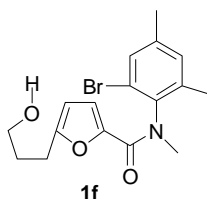

Yellow oil, (490 mg, 45% over 3 steps), IR (KBr) 3636, 3067, 2944, 1729, 1666, 1588, 1470, 1264, 963, 853, 746  $cm^{-1}$ ;  $^1H$  NMR (400 MHz,  $CDCl_3$ )  $\delta$  7.33 (s, 1H), 7.05 (s, 1H), 5.87 (s, 1H), 5.83 (s, 1H), 3.56 (t,  $J = 5.7$  Hz, 2H), 3.26 (s, 3H), 2.62 (t,  $J = 7.4$  Hz, 2H), 2.34 (s, 3H), 2.31 (s, 1H), 2.19 (s, 3H), 1.76 – 1.71 (m, 2H);  $^{13}C$  NMR (100 MHz,  $CDCl_3$ )  $\delta$  159.3, 158.5, 145.5, 139.9, 138.8, 138.1, 131.6, 131.0, 123.8, 116.6, 107.3, 61.4, 35.4, 30.4, 24.3, 20.8, 18.3; HRMS (ESI)  $m/z$  calcd for  $C_{17}H_{20}BrNO_3$ :  $[M + Na]^+$ : 388.0519; Found: 388.0514.

***N*-(2-bromo-4-methoxyphenyl)-5-(3-hydroxypropyl)-*N*-methylfuran-2-carboxamide (1g)**

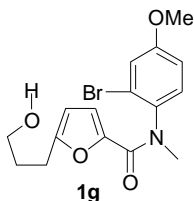

Colorless solid, (695 mg, 63% over 3 steps), m.p. = 103.2-104.8 °C, IR (KBr) 3635, 2920, 1734, 1641, 1595, 1426, 970, 866, 721  $\text{cm}^{-1}$ ;  $^1\text{H}$  NMR (400 MHz,  $\text{CDCl}_3$ )  $\delta$  7.21 (d,  $J$  = 6.9 Hz, 2H), 6.91 (d,  $J$  = 8.5 Hz, 1H), 5.94 (s, 1H), 5.90 (s, 1H), 3.86 (s, 3H), 3.57 (t,  $J$  = 5.9 Hz, 2H), 3.32 (s, 3H), 2.62 (t,  $J$  = 7.1 Hz, 2H), 1.91 (s, 1H), 1.80 – 1.66 (m, 2H);  $^{13}\text{C}$  NMR (100 MHz,  $\text{CDCl}_3$ )  $\delta$  159.7, 159.5, 158.3, 145.6, 135.9, 130.3, 124.0, 118.5, 117.3, 114.4, 107.2, 61.6, 55.8, 37.1, 30.4, 24.3; HRMS (ESI)  $m/z$  calcd for  $\text{C}_{16}\text{H}_{18}\text{BrNO}_4$ :  $[\text{M} + \text{H}]^+$  368.0492; Found: 368.0492.

***N*-(2-bromo-4-(*tert*-butyl)phenyl)-5-(3-hydroxypropyl)-*N*-methylfuran-2-carboxamide (1h)**

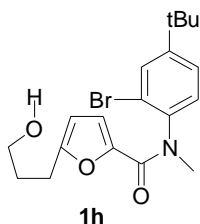

Colorless oil, (613 mg, 52% over 3 steps), IR (KBr) 3636, 3301, 2952, 2846, 1726, 1568, 1428, 956, 839, 750, 694  $\text{cm}^{-1}$ ;  $^1\text{H}$  NMR (400 MHz,  $\text{CDCl}_3$ )  $\delta$  7.66 (s, 1H), 7.38 (d,  $J$  = 8.2 Hz, 1H), 7.21 (d,  $J$  = 8.2 Hz, 1H), 6.06 (s, 1H), 5.90 (s, 1H), 3.55 (t,  $J$  = 6.0 Hz, 2H), 3.33 (s, 3H), 2.57 (t,  $J$  = 6.7 Hz, 2H), 2.03 (s, 1H), 1.76 – 1.62 (m, 2H), 1.35 (s, 9H);  $^{13}\text{C}$  NMR (100 MHz,  $\text{CDCl}_3$ )  $\delta$  159.3, 158.2, 153.4, 145.7, 140.3, 130.5, 129.3, 125.7, 123.1, 117.4, 107.3, 61.4, 37.0, 34.8, 31.2, 30.3, 24.3; HRMS (ESI)  $m/z$  calcd for  $\text{C}_{19}\text{H}_{24}\text{BrNO}_3$ :  $[\text{M} + \text{H}]^+$  : 394.1012; Found: 394.1012.

***N*-(2-bromo-4-(*tert*-butyl)phenyl)-*N*-ethyl-5-(3-hydroxypropyl)furan-2-carboxamide (1i)**

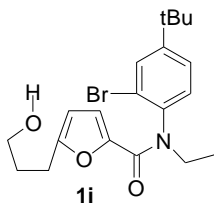

Colorless oil, (647 mg, 53% over 3 steps), IR (KBr) 3636, 3354, 2923, 1732, 1632, 1524, 1466, 968, 858, 828, 743, 697  $\text{cm}^{-1}$ ;  $^1\text{H}$  NMR (400 MHz,  $\text{CDCl}_3$ )  $\delta$  7.66 (s, 1H), 7.34 (d,  $J$  = 8.2 Hz, 1H), 7.16 (d,  $J$  = 8.2 Hz, 1H), 5.98 (s, 1H), 5.88 (s, 1H), 4.25 – 4.15 (m, 1H), 3.55 (t,  $J$  = 5.9 Hz, 2H), 3.52 – 3.41 (m, 1H), 2.55 (t,  $J$  = 6.5 Hz, 2H), 2.00 (s, 1H), 1.74 – 1.63 (m, 2H), 1.35 (s, 9H), 1.22 (t,  $J$  = 7.1 Hz, 3H);  $^{13}\text{C}$  NMR (100 MHz,  $\text{CDCl}_3$ )  $\delta$  158.8, 158.1, 153.3, 145.9, 138.6, 130.6, 130.4, 125.3, 123.7, 117.2, 107.2, 61.5, 44.4, 34.8, 31.2, 30.4, 24.3, 12.7; HRMS (ESI)  $m/z$  calcd for  $\text{C}_{20}\text{H}_{26}\text{BrNO}_3$ :  $[\text{M} + \text{H}]^+$  : 408.1169; Found: 408.1169.

***N*-(2-bromo-4-(*tert*-butyl)phenyl)-5-(3-hydroxypropyl)-*N*-isopropylfuran-2-carboxamide (1k)**

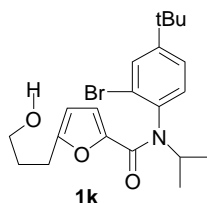

Colorless oil, (631 mg, 50% over 3 steps), IR (KBr) 3635, 3067, 2947, 1720, 1583, 1490, 1261, 971, 751, 696  $\text{cm}^{-1}$ ;  $^1\text{H}$  NMR (400 MHz,  $\text{CDCl}_3$ )  $\delta$  7.64 (s, 1H), 7.39 (d,  $J = 8.3$  Hz, 1H), 7.22 (d,  $J = 8.3$  Hz, 1H), 5.87 (s, 2H), 4.92 – 4.85 (m, 1H), 3.56 (t,  $J = 6.2$  Hz, 2H), 2.56 (t,  $J = 7.3$  Hz, 2H), 2.10 (s, 1H), 1.72 – 1.66 (m, 2H), 1.36 (s, 12H), 1.13 (d,  $J = 6.9$  Hz, 3H);  $^{13}\text{C}$  NMR (100 MHz,  $\text{CDCl}_3$ )  $\delta$  158.9, 158.0, 153.5, 146.4, 136.5, 130.9, 130.6, 125.8, 125.1, 116.9, 107.2, 61.4, 49.6, 34.8, 31.2, 30.4, 24.3, 21.9; HRMS (ESI)  $m/z$  calcd for  $\text{C}_{21}\text{H}_{28}\text{BrNO}_3$ :  $[\text{M} + \text{H}]^+$ : 422.1325; Found: 422.1323.

***N*-(2-bromophenyl)-5-(4-hydroxybutyl)-*N*-methylfuran-2-carboxamide (1l)**

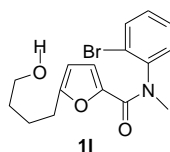

Colorless oil, (473 mg, 45% over 3 steps), IR (KBr) 3635, 3043, 2946, 1741, 1677, 1584, 1479, 1185, 972, 857, 764, 692  $\text{cm}^{-1}$ ;  $^1\text{H}$  NMR (400 MHz,  $\text{CDCl}_3$ )  $\delta$  7.68 (d,  $J = 7.9$  Hz, 1H), 7.37 (t,  $J = 7.5$  Hz, 1H), 7.30 – 7.23 (m, 2H), 6.07 (s, 1H), 5.87 (s, 1H), 3.60 (t,  $J = 5.3$  Hz, 2H), 3.35 (s, 3H), 2.47 (t,  $J = 7.0$  Hz, 2H), 1.81 (s, 1H), 1.55 – 1.45 (m, 4H);  $^{13}\text{C}$  NMR (100 MHz,  $\text{CDCl}_3$ )  $\delta$  159.2, 158.7, 145.5, 143.2, 133.6, 130.0, 129.5, 128.7, 123.5, 117.5, 107.1, 62.2, 37.0, 31.9, 27.6, 23.6; HRMS (ESI)  $m/z$  calcd for  $\text{C}_{16}\text{H}_{18}\text{BrNO}_3$   $[\text{M} + \text{H}]^+$ : 352.0543; Found: 352.0540.

***N*-(2-bromo-5-methylphenyl)-5-(4-hydroxybutyl)-*N*-methylfuran-2-carboxamide (1m)**

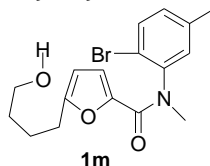

Colorless oil, (536 mg, 49% over 3 steps), IR (KBr) 3636, 3056, 2921, 1736, 1631, 1591, 1426, 1359, 939, 807, 741, 704  $\text{cm}^{-1}$ ;  $^1\text{H}$  NMR (400 MHz,  $\text{CDCl}_3$ )  $\delta$  7.52 (d,  $J = 8.1$  Hz, 1H), 7.11 (s, 1H), 7.07 (d,  $J = 8.1$  Hz, 1H), 5.98 (s, 1H), 5.87 (s, 1H), 3.60 (t,  $J = 6.1$  Hz, 2H), 3.31 (s, 3H), 2.49

(t,  $J = 7.0$  Hz, 2H), 2.32 (s, 3H), 1.55 – 1.45 (m, 4H);  $^{13}\text{C}$  NMR (100 MHz,  $\text{CDCl}_3$ )  $\delta$  159.2, 158.8, 145.4, 142.7, 139.1, 133.2, 130.5, 130.4, 119.8, 117.4, 107.1, 62.1, 37.1, 31.9, 27.6, 23.7, 20.7; HRMS (ESI)  $m/z$  calcd for  $\text{C}_{17}\text{H}_{20}\text{BrNO}_3$ :  $[\text{M} + \text{H}]^+$  366.0699; Found: 366.0700.

***N*-(2-bromo-5-methylphenyl)-*N*-ethyl-5-(4-hydroxybutyl)furan-2-carboxamide (1n)**

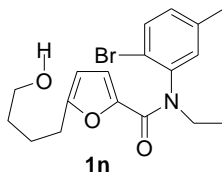

Yellow oil, (591 mg, 52% over 3 steps), IR (KBr) 3635, 3044, 2946, 1742, 1586, 1475, 1192, 968, 857, 697  $\text{cm}^{-1}$ ;  $^1\text{H}$  NMR (400 MHz,  $\text{CDCl}_3$ )  $\delta$  7.53 (d,  $J = 8.6$  Hz, 1H), 7.08 (d,  $J = 5.9$  Hz, 2H), 5.92 (s, 1H), 5.85 (s, 1H), 4.20 – 4.10 (m, 1H), 3.60 (t,  $J = 6.1$  Hz, 2H), 3.54 – 3.45 (m, 1H), 2.50 (s, 1H), 2.49 (t,  $J = 7.0$  Hz, 2H), 2.33 (s, 3H), 1.59 – 1.45 (m, 4H), 1.22 (t,  $J = 7.1$  Hz, 3H);  $^{13}\text{C}$  NMR (100 MHz,  $\text{CDCl}_3$ )  $\delta$  158.8, 158.6, 145.6, 141.1, 138.6, 133.2, 131.5, 130.3, 120.6, 117.2, 107.1, 62.1, 44.5, 31.9, 27.7, 23.7, 20.7, 12.6; HRMS (ESI)  $m/z$  calcd for  $\text{C}_{18}\text{H}_{22}\text{BrNO}_3$ :  $[\text{M} + \text{H}]^+$ : 380.0856; Found: 380.0856.

***N*-(2-bromo-4-methylphenyl)-5-(4-hydroxybutyl)-*N*-methylfuran-2-carboxamide (1o)**

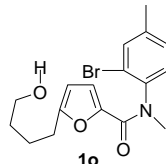

Colorless oil, (525 mg, 48% over 3 steps), IR (KBr) 3635, 3317, 3044, 2933, 1736, 1594, 1494, 1120, 950, 868, 797, 746  $\text{cm}^{-1}$ ;  $^1\text{H}$  NMR (400 MHz,  $\text{CDCl}_3$ )  $\delta$  7.49 (s, 1H), 7.16 (s, 2H), 5.92 (s, 1H), 5.86 (s, 1H), 3.59 (t,  $J = 5.7$  Hz, 2H), 3.31 (s, 3H), 2.50 (t,  $J = 6.4$  Hz, 2H), 2.39 (s, 3H), 2.25 (s, 1H), 1.58 – 1.45 (m, 4H);  $^{13}\text{C}$  NMR (100 MHz,  $\text{CDCl}_3$ )  $\delta$  159.4, 158.7, 145.4, 140.4, 140.1, 134.0, 129.5, 129.4, 123.0, 117.3, 107.0, 62.1, 37.0, 31.9, 27.6, 23.7, 20.8; HRMS (ESI)  $m/z$  calcd for  $\text{C}_{17}\text{H}_{20}\text{BrNO}_3$   $[\text{M} + \text{Na}]^+$ : 388.0519; Found: 388.0516.

***N*-(2-bromo-4,6-dimethylphenyl)-5-(4-hydroxybutyl)-*N*-methylfuran-2-carboxamide (1p)**

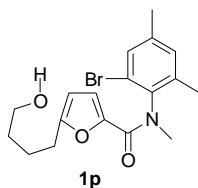

Colorless oil, (602 mg, 53% over 3 steps), IR (KBr) 3596, 3041, 2945, 1635, 1428, 1264, 930, 744, 701  $\text{cm}^{-1}$ ;  $^1\text{H}$  NMR (400 MHz,  $\text{CDCl}_3$ )  $\delta$  7.32 (s, 1H), 7.04 (s, 1H), 5.85 (d,  $J = 2.7$  Hz, 1H), 5.83 (d,  $J = 2.7$  Hz, 1H), 3.61 (t,  $J = 6.1$  Hz, 2H), 3.25 (s, 3H), 2.53 (t,  $J = 6.6$  Hz, 2H), 2.34 (s, 3H), 2.19 (s, 3H), 1.60 – 1.45 (m, 4H);  $^{13}\text{C}$  NMR (100 MHz,  $\text{CDCl}_3$ )  $\delta$  159.3, 158.8, 145.4, 139.8, 138.8, 138.1, 131.6, 131.0, 123.8, 116.6, 107.1, 62.2, 35.3, 31.9, 27.7, 23.6, 20.8, 18.3; HRMS (ESI)  $m/z$  calcd for  $\text{C}_{18}\text{H}_{22}\text{BrNO}_3$   $[\text{M} + \text{H}]^+$ : 380.0856; Found: 380.0855.

***N*-(2-bromo-4-(tert-butyl)phenyl)-5-(4-hydroxybutyl)-*N*-methylfuran-2-carboxamide (1q)**

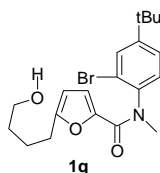

Colorless solid, (683 mg, 56% over 3 steps), m.p. = 77.8 – 78.4°C, IR (KBr) 3635, 3043, 2947, 1724, 1582, 1491, 1193, 968, 853, 750, 694  $\text{cm}^{-1}$ ;  $^1\text{H}$  NMR (400 MHz,  $\text{CDCl}_3$ )  $\delta$  7.66 (s, 1H), 7.37 (d,  $J = 8.2$  Hz, 1H), 7.21 (d,  $J = 8.2$  Hz, 1H), 6.02 (s, 1H), 5.87 (s, 1H), 3.61 (t,  $J = 5.7$  Hz, 2H), 3.33 (s, 3H), 2.47 (t,  $J = 6.4$  Hz, 2H), 1.82 (s, 1H), 1.58 – 1.45 (m, 4H), 1.35 (s, 9H);  $^{13}\text{C}$  NMR (100 MHz,  $\text{CDCl}_3$ )  $\delta$  159.2, 158.6, 153.4, 145.6, 140.3, 130.5, 129.3, 125.7, 123.0, 117.4, 107.1, 62.2, 37.0, 34.8, 31.9, 31.2, 27.6, 23.6; HRMS (ESI)  $m/z$  calcd for  $\text{C}_{20}\text{H}_{26}\text{BrNO}_3$   $[\text{M} + \text{H}]^+$ : 408.1169; Found: 408.1169.

***N*-(2-bromo-4-methoxyphenyl)-5-(4-hydroxybutyl)-*N*-methylfuran-2-carboxamide (1r)**

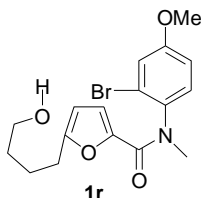

Colorless solid, (720 mg, 63% over 3 steps), m.p. = 91.5 – 92.8°C, IR (KBr) 3065, 2946, 1736, 1588, 1438, 1144, 949, 862, 749  $\text{cm}^{-1}$ ;  $^1\text{H}$  NMR (400 MHz,  $\text{CDCl}_3$ )  $\delta$  7.23 – 7.07 (m, 2H), 6.93 – 6.83 (m, 1H), 5.91 (s, 1H), 5.86 (s, 1H), 3.84 (s, 3H), 3.59 (t,  $J = 5.7$  Hz, 2H), 3.29 (s, 3H), 2.52 (t,

$J = 5.7$  Hz, 2H), 1.59 – 1.48 (m, 4H);  $^{13}\text{C}$  NMR (100 MHz,  $\text{CDCl}_3$ )  $\delta$  159.6, 159.5, 158.7, 145.4, 135.8, 130.3, 123.9, 118.5, 117.3, 114.4, 107.0, 62.1, 55.8, 37.1, 31.9, 27.7, 23.7; HRMS (ESI)  $m/z$  calcd for  $\text{C}_{17}\text{H}_{20}\text{BrNO}_4$   $[\text{M} + \text{H}]^+$ : 382.0648; Found: 382.0648.

***N*-(2-bromo-4-fluorophenyl)-5-(4-hydroxybutyl)-*N*-methylfuran-2-carboxamide (1s)**

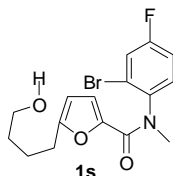

Yellow oil, (610 mg, 55% over 3 steps), IR (KBr) 3634, 3041, 2946, 1735, 1668, 1591, 1489, 1241 971, 855, 742, 703  $\text{cm}^{-1}$ ;  $^1\text{H}$  NMR (400 MHz,  $\text{CDCl}_3$ )  $\delta$  7.46 – 7.37 (m, 1H), 7.37 – 7.24 (m, 1H), 7.16 – 7.05 (m, 1H), 6.19 (s, 1H), 5.91 (s, 1H), 3.59 (t,  $J = 6.1$  Hz, 2H), 3.31 (s, 3H), 2.54 (s, 1H), 2.48 (t,  $J = 7.0$  Hz, 2H), 1.59 – 1.41 (m, 4H);  $^{13}\text{C}$  NMR (100 MHz,  $\text{CDCl}_3$ )  $\delta$  161.5, 159.2, 158.9, 145.4, 139.5, 130.9, 124.1, 120.7, 117.8, 115.7, 107.1, 62.1, 37.1, 31.8, 27.6, 23.7; HRMS (ESI)  $m/z$  calcd for  $\text{C}_{16}\text{H}_{17}\text{BrFNO}_3$   $[\text{M} + \text{H}]^+$ : 370.0449; Found: 370.0449.

***N*-(2-bromo-5-fluorophenyl)-5-(4-hydroxybutyl)-*N*-methylfuran-2-carboxamide (1t)**

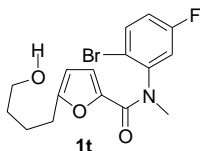

Colorless oil, (444 mg, 40% over 3 steps), IR (KBr) 3435, 3066, 2921, 1775, 1650, 1584, 1471, 1193, 967, 859, 746  $\text{cm}^{-1}$ ;  $^1\text{H}$  NMR (400 MHz,  $\text{CDCl}_3$ )  $\delta$  7.65 – 7.61 (m, 1H), 7.14 – 6.97 (m, 2H), 6.33 (s, 1H), 5.92 (s, 1H), 3.62 (t,  $J = 6.5$  Hz, 2H), 3.34 (s, 3H), 2.48 (t,  $J = 7.0$  Hz, 2H), 1.94 (s, 1H), 1.55 – 1.45 (m, 4H);  $^{13}\text{C}$  NMR (100 MHz,  $\text{CDCl}_3$ )  $\delta$  163.3, 160.8, 158.9, 145.4, 134.3, 118.0, 117.5, 117.3, 116.9, 116.7, 107.2, 62.2, 36.9, 31.9, 27.7, 23.7; HRMS (ESI)  $m/z$  calcd for  $\text{C}_{16}\text{H}_{17}\text{BrFNO}_3$ :  $[\text{M} + \text{H}]^+$ : 370.0449; Found: 370.0447.

***N*-(2-bromophenyl)-5-(5-hydroxypentyl)-*N*-methylfuran-2-carboxamide (1u)**

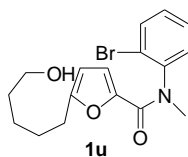

Yellow oil, (438 mg, 40% over 3 steps), IR (KBr) 3643, 3065, 2934, 1733, 1650, 1472, 1183, 917, 812, 746  $\text{cm}^{-1}$ ;  $^1\text{H}$  NMR (400 MHz,  $\text{CDCl}_3$ )  $\delta$  7.65 (d,  $J = 7.1$  Hz, 1H), 7.35 (t,  $J = 7.1$  Hz, 1H), 7.28 – 7.22 (m, 2H), 6.06 (s, 1H), 5.83 (s, 1H), 3.59 (t,  $J = 6.5$  Hz, 2H), 3.32 (s, 3H), 2.48 (t,  $J = 7.0$  Hz, 2H), 2.28 (s, 1H), 1.52– 1.49 (m, 2H), 1.47– 1.41 (m, 2H), 1.27– 1.25 (m, 2H);  $^{13}\text{C}$  NMR (100 MHz,  $\text{CDCl}_3$ )  $\delta$  159.2, 158.9, 145.4, 143.1, 133.6, 130.0, 129.5, 128.7, 123.4, 117.5, 106.9, 62.4, 37.0, 32.2, 27.8, 27.1, 25.1; HRMS (ESI)  $m/z$  calcd for  $\text{C}_{17}\text{H}_{20}\text{BrNO}_3$   $[\text{M} + \text{H}]^+$ : 366.0699; Found: 366.0698.

***N*-(2-bromophenyl)-5-(6-hydroxyhexyl)-*N*-methylfuran-2-carboxamide (1v)**

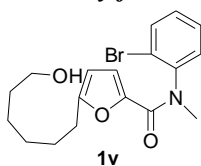

Yellow oil, (530 mg, 46% over 3 steps), IR (KBr) 3615, 3206, 2945, 1660, 1584, 1473, 1187, 945, 747  $\text{cm}^{-1}$ ;  $^1\text{H}$  NMR (400 MHz,  $\text{CDCl}_3$ )  $\delta$  7.67 (d,  $J = 7.9$  Hz, 1H), 7.36 (t,  $J = 7.5$  Hz, 1H), 7.23 – 7.29 (m, 2H), 6.08 (s, 1H), 5.84 (s, 1H), 3.62 (t,  $J = 6.4$  Hz, 2H), 3.34 (s, 3H), 2.48 (t,  $J = 7.0$  Hz, 2H), 1.69 (s, 1H), 1.55 – 1.49 (m, 2H), 1.46 – 1.37 (m, 2H), 1.36 – 1.25 (m, 2H), 1.25 – 1.22 (m, 2H);  $^{13}\text{C}$  NMR (100 MHz,  $\text{CDCl}_3$ )  $\delta$  159.2, 159.1, 145.5, 143.2, 133.6, 130.1, 129.5, 128.6, 123.5, 117.5, 106.8, 62.7, 37.0, 32.5, 28.6, 27.8, 27.3, 25.3; HRMS (ESI)  $m/z$  calcd for  $\text{C}_{18}\text{H}_{22}\text{BrNO}_3$   $[\text{M} + \text{Na}]^+$ : 402.0675; Found: 402.0671.

***N*-(2-bromophenyl)-5-(2-hydroxyethyl)-*N*-methylfuran-2-carboxamide (1w)**

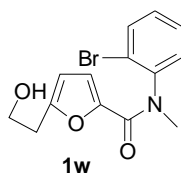

Colorless oil, (406 mg, 42% over 3 steps), IR (KBr) 3606, 3051, 2948, 1733, 1588, 1431, 1265, 945, 743  $\text{cm}^{-1}$ ;  $^1\text{H}$  NMR (400 MHz,  $\text{CDCl}_3$ )  $\delta$  7.67 (d,  $J = 7.9$  Hz, 1H), 7.37 (t,  $J = 7.5$  Hz, 1H), 7.27 (dd,  $J = 13.5, 6.9$  Hz, 2H), 6.00 (s, 1H), 5.96 (s, 1H), 3.67 (t,  $J = 5.6$  Hz, 2H), 3.33 (s, 3H), 2.72 (t,  $J = 5.6$  Hz, 2H), 2.60 (s, 1H);  $^{13}\text{C}$  NMR (100 MHz,  $\text{CDCl}_3$ )  $\delta$  159.2, 156.0, 145.8, 143.0, 133.7, 130.0, 129.7, 128.7, 123.4, 117.5, 108.4, 60.0, 37.0, 31.6; HRMS (ESI)  $m/z$  calcd for  $\text{C}_{14}\text{H}_{14}\text{BrNO}_3$   $[\text{M} + \text{Na}]^+$ : 346.0049; Found: 346.0043.

## Characterization of 2

### *1'-methyl-spiro[2,3']oxindole-spiro[2,2']tetrahydrofuran-2,5-dihydrofuran (2a)*

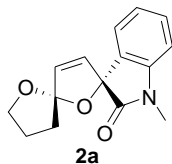

Yellow oil, (63 mg, 82%), IR (KBr) 2944, 2847, 1730, 1609, 1490, 1348, 1001, 864, 751, 692  $\text{cm}^{-1}$ ;  $^1\text{H}$  NMR (400 MHz,  $\text{CDCl}_3$ )  $\delta$  7.34 (t,  $J = 7.6$  Hz, 1H), 7.13 – 7.06 (m, 2H), 6.83 (d,  $J = 7.8$  Hz, 1H), 6.15 (d,  $J = 5.6$  Hz, 1H), 5.87 (d,  $J = 5.6$  Hz, 1H), 4.28 – 4.16 (m, 1H), 4.05 – 3.89 (m, 1H), 3.20 (s, 3H), 2.31 – 2.23 (m, 2H), 2.23 – 2.12 (m, 1H), 2.06 – 1.99 (m, 1H);  $^{13}\text{C}$  NMR (100 MHz,  $\text{CDCl}_3$ )  $\delta$  173.7, 144.0, 132.0, 130.7, 130.2, 127.7, 124.2, 122.9, 120.6, 108.4, 89.0, 69.0, 37.7, 26.5, 24.7; HRMS (ESI)  $m/z$  calcd for  $\text{C}_{15}\text{H}_{15}\text{NO}_3$   $[\text{M} + \text{Na}]^+$ : 280.0944; Found: 280.0951.

### *1'-methyl-spiro[2,3']5'-fluoro-oxindole-spiro[2,2']tetrahydrofuran-2,5-dihydrofuran (2b)*

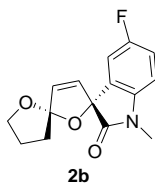

Yellow oil, (76 mg, 85%), IR (KBr) 2925, 2849, 1730, 1494, 1110, 980, 804, 747, 699  $\text{cm}^{-1}$ ;  $^1\text{H}$  NMR (400 MHz,  $\text{CDCl}_3$ )  $\delta$  7.11 (d,  $J = 7.4$  Hz, 1H), 7.03 (t,  $J = 8.8$  Hz, 1H), 6.79 – 3.71 (m, 1H), 6.15 (d,  $J = 5.7$  Hz, 1H), 5.84 (d,  $J = 5.7$  Hz, 1H), 4.24 – 4.10 (m, 1H), 3.98 – 3.92 (m, 1H), 3.20 (s, 3H), 2.47 (q,  $J = 11.4$  Hz, 1H), 2.29 – 2.15 (m, 2H), 2.05 (t,  $J = 11.3$  Hz, 1H);  $^{13}\text{C}$  NMR (100 MHz,  $\text{CDCl}_3$ )  $\delta$  174.3, 159.7, 139.2, 132.3, 130.2, 129.5, 121.0, 116.4, 113.5, 108.8, 89.0, 69.0, 37.0, 26.6, 24.7; HRMS (ESI)  $m/z$  calcd for  $\text{C}_{15}\text{H}_{14}\text{FNO}_3$   $[\text{M} + \text{Na}]^+$ : 298.0850; Found: 298.0858.

### *1'-methyl-spiro[2,3']6'-fluoro-oxindole-spiro[2,2']tetrahydrofuran-2,5-dihydrofuran (2c)*

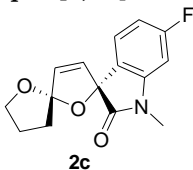

Yellow solid, (68 mg, 83%), m.p. = 124.8-125.5  $^{\circ}\text{C}$ , IR (KBr) 2947, 2823, 1735, 1581, 1264, 1186, 965, 748  $\text{cm}^{-1}$ ;  $^1\text{H}$  NMR (400 MHz,  $\text{CDCl}_3$ )  $\delta$  7.14 – 7.00 (m, 1H), 6.74 (t,  $J = 8.8$  Hz, 1H), 6.57 (d,  $J = 8.2$  Hz, 1H), 6.16 (d,  $J = 5.7$  Hz, 1H), 5.84 (d,  $J = 5.7$  Hz, 1H), 4.23 – 4.18 (m, 1H), 3.98 (q,



$J = 7.4$  Hz, 1H), 3.19 (s, 3H), 2.33 – 2.12 (m, 3H), 2.09 – 1.98 (m, 1H);  $^{13}\text{C}$  NMR (100 MHz,  $\text{CDCl}_3$ )  $\delta$  174.0, 164.3, 145.7, 132.4, 130.4, 125.6, 123.0, 120.5, 109.4, 97.4, 88.4, 69.0, 37.7, 26.6, 24.7; HRMS (ESI)  $m/z$  calcd for  $\text{C}_{15}\text{H}_{14}\text{FNO}_3$   $[\text{M} + \text{Na}]^+$ : 298.0850; Found: 298.0856.

***1'-methyl-spiro[2,3']5'-methyl-oxindole-spiro[2,2']tetrahydrofuran-2,5-dihydrofuran (2d)***

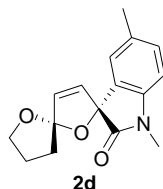

Yellow oil, (61 mg, 75%), IR (KBr) 2948, 2824, 1725, 1583, 1491, 1262, 947, 749  $\text{cm}^{-1}$ ;  $^1\text{H}$  NMR (400 MHz,  $\text{CDCl}_3$ )  $\delta$  7.11 (d,  $J = 7.9$  Hz, 1H), 6.91 (s, 1H), 6.70 (d,  $J = 7.9$  Hz, 1H), 6.12 (d,  $J = 5.7$  Hz, 1H), 5.84 (d,  $J = 5.7$  Hz, 1H), 4.22 – 4.17 (m, 1H), 3.96 (q,  $J = 7.5$  Hz, 1H), 3.16 (s, 3H), 2.31 (s, 3H), 2.26 (t,  $J = 6.9$  Hz, 2H), 2.18 – 2.14 (m, 1H), 2.07 – 1.96 (m, 1H);  $^{13}\text{C}$  NMR (100 MHz,  $\text{CDCl}_3$ )  $\delta$  173.7, 141.6, 132.5, 131.9, 130.9, 130.4, 127.6, 125.0, 120.5, 108.2, 89.2, 69.0, 37.7, 26.5, 24.7, 20.9; HRMS (ESI)  $m/z$  calcd for  $\text{C}_{16}\text{H}_{17}\text{NO}_3$   $[\text{M} + \text{Na}]^+$ : 294.1101; Found: 294.1105.

***1'-methyl-spiro[2,3']6'-methyl-oxindole-spiro[2,2']tetrahydrofuran-2,5-dihydrofuran (2e)***

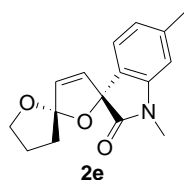

Yellow oil, (65 mg, 80%), IR (KBr) 2946, 2845, 1728, 1582, 1466, 1262, 948, 835, 751, 699  $\text{cm}^{-1}$ ;  $^1\text{H}$  NMR (400 MHz,  $\text{CDCl}_3$ )  $\delta$  7.00 (d,  $J = 7.5$  Hz, 1H), 6.88 (d,  $J = 7.5$  Hz, 1H), 6.65 (s, 1H), 6.14 (d,  $J = 5.6$  Hz, 1H), 5.85 (d,  $J = 5.6$  Hz, 1H), 4.27 – 4.17 (m, 1H), 4.00 – 3.95 (m, 1H), 3.19 (s, 3H), 2.40 (s, 3H), 2.28 – 2.13 (m, 3H), 2.07 – 1.96 (m, 1H);  $^{13}\text{C}$  NMR (100 MHz,  $\text{CDCl}_3$ )  $\delta$  174.0, 144.1, 140.7, 131.9, 130.8, 124.7, 124.0, 123.4, 120.4, 109.3, 88.9, 68.9, 37.7, 26.4, 24.7, 21.9; HRMS (ESI)  $m/z$  calcd for  $\text{C}_{16}\text{H}_{17}\text{NO}_3$   $[\text{M} + \text{Na}]^+$ : 294.1101; Found: 294.1105.

***1'-methyl-spiro[2,3']5',7'-dimethyl-oxindole-spiro[2,2']tetrahydrofuran-2,5-dihydrofuran (2f)***

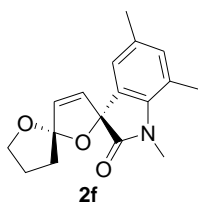

Yellow oil, (60 mg, 70%), IR (KBr) 2944, 2828, 1725, 1678, 1585, 1473, 1264, 1161, 990, 746  $\text{cm}^{-1}$ ;  $^1\text{H}$  NMR (400 MHz,  $\text{CDCl}_3$ )  $\delta$  6.87 (s, 1H), 6.76 (s, 1H), 6.12 (d,  $J = 5.6$  Hz, 1H), 5.84 (d,  $J = 5.6$  Hz, 1H), 4.24 – 4.19 (m, 1H), 3.98 (q,  $J = 7.5$  Hz, 1H), 3.46 (s, 3H), 2.52 (s, 3H), 2.28 (s, 3H), 2.27 – 2.16 (m, 3H), 2.05 – 1.99 (m, 1H);  $^{13}\text{C}$  NMR (100 MHz,  $\text{CDCl}_3$ )  $\delta$  174.4, 139.2, 134.3, 132.4, 131.7, 131.1, 128.3, 122.9, 120.4, 119.8, 88.7, 68.9, 37.7, 29.9, 24.7, 20.6, 18.7; HRMS (ESI)  $m/z$  calcd for  $\text{C}_{17}\text{H}_{19}\text{NO}_3$  [ $\text{M} + \text{Na}$ ] $^+$ : 308.1257; Found: 308.1264.

***1'-methyl-spiro[2,3']5'-methoxy-oxindole-spiro[2,2']tetrahydrofuran-2,5-dihydrofuran (2g)***

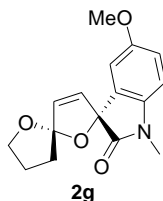

Yellow oil, (63 mg, 75%), IR (KBr) 2947, 2823, 1726, 1582, 1492, 1265, 1188, 924, 856, 743  $\text{cm}^{-1}$ ;  $^1\text{H}$  NMR (400 MHz,  $\text{CDCl}_3$ )  $\delta$  6.85 – 6.82 (m, 1H), 6.78 – 6.65 (m, 2H), 6.13 (d,  $J = 5.6$  Hz, 1H), 5.85 (d,  $J = 5.6$  Hz, 1H), 4.28 – 4.16 (m, 1H), 3.96 (q,  $J = 7.4$  Hz, 1H), 3.78 (s, 3H), 3.16 (s, 3H), 2.29 – 2.12 (m, 3H), 2.06 – 1.98 (m, 1H);  $^{13}\text{C}$  NMR (100 MHz,  $\text{CDCl}_3$ )  $\delta$  173.4, 156.3, 137.4, 132.0, 130.7, 129.0, 120.6, 114.3, 111.7, 108.8, 89.3, 69.0, 55.8, 37.7, 26.6, 24.7; HRMS (ESI)  $m/z$  calcd for  $\text{C}_{16}\text{H}_{17}\text{NO}_4$  [ $\text{M} + \text{Na}$ ] $^+$ : 310.1050; Found: 310.1057.

***1'-methyl-spiro[2,3']5'-(tert-butyl)-oxindole-spiro[2,2']tetrahydrofuran-2,5-dihydrofuran (2h)***

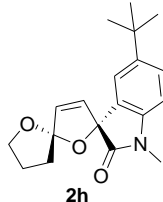

Yellow oil, (68 mg, 72%), IR (KBr) 2951, 2823, 1730, 1581, 1494, 1264, 1190, 947, 747  $\text{cm}^{-1}$ ;  $^1\text{H}$  NMR (400 MHz,  $\text{CDCl}_3$ )  $\delta$  7.34 (d,  $J = 7.4$  Hz, 1H), 7.11 (s, 1H), 6.74 (d,  $J = 8.2$  Hz, 1H), 6.14 (d,  $J = 5.7$  Hz, 1H), 5.86 (d,  $J = 5.7$  Hz, 1H), 4.23 – 4.18 (m, 1H), 3.97 (q,  $J = 7.5$  Hz, 1H), 3.17 (s, 3H), 2.29 – 2.16 (m, 3H), 2.08 – 1.97 (m, 1H), 1.30 (s, 9H);  $^{13}\text{C}$  NMR (100 MHz,  $\text{CDCl}_3$ )  $\delta$  173.8,

146.2, 141.6, 132.0, 130.9, 127.3, 126.9, 121.2, 120.5, 107.9, 89.3, 68.9, 37.8, 34.5, 31.5, 26.5, 24.7; HRMS (ESI)  $m/z$  calcd for  $C_{19}H_{23}NO_3$   $[M + Na]^+$ : 336.1570; Found: 336.1577.

***1'-ethyl-spiro[2,3']5'-(tert-butyl)-oxindole-spiro[2,2']tetrahydrofuran-2,5-dihydrofuran (2i)***

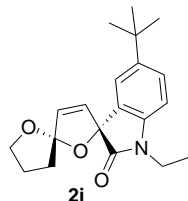

Yellow oil, (64 mg, 65%), IR (KBr) 2960, 1730, 1620, 1599, 1469, 1210, 976, 878, 832, 744  $cm^{-1}$ ;  $^1H$  NMR (400 MHz,  $CDCl_3$ )  $\delta$  7.33 (d,  $J = 7.5$  Hz, 1H), 7.11 (s, 1H), 6.76 (d,  $J = 8.2$  Hz, 1H), 6.13 (d,  $J = 5.7$  Hz, 1H), 5.86 (d,  $J = 5.7$  Hz, 1H), 4.24 – 4.19 (m, 1H), 3.97 (q,  $J = 7.4$  Hz, 1H), 3.81 – 3.62 (m, 2H), 2.34 – 2.12 (m, 3H), 2.04 – 2.01 (m, 1H), 1.30 (s, 9H), 1.26 (t,  $J = 7.2$  Hz, 3H);  $^{13}C$  NMR (100 MHz,  $CDCl_3$ )  $\delta$  173.3, 145.9, 140.7, 131.8, 131.0, 127.5, 126.9, 121.4, 120.5, 108.1, 89.4, 69.0, 37.8, 35.0, 34.5, 31.5, 24.8, 12.6; HRMS (ESI)  $m/z$  calcd for  $C_{20}H_{25}NO_3$   $[M + Na]^+$ : 350.1727; Found: 350.1735.

***1'-methyl-spiro[2,3']oxindole-spiro[2,2']tetrahydro-2H-pyran-2,5-dihydrofuran (2l)***

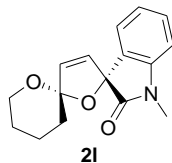

Yellow oil, (59 mg, 73%), IR (KBr) 2943, 2848, 1731, 1609, 1492, 1368, 1265, 1001, 976, 943, 866, 749  $cm^{-1}$ ;  $^1H$  NMR (400 MHz,  $CDCl_3$ )  $\delta$  7.33 (t,  $J = 7.6$  Hz, 1H), 7.14 – 7.02 (m, 2H), 6.82 (d,  $J = 7.8$  Hz, 1H), 6.15 (d,  $J = 5.7$  Hz, 1H), 5.81 (d,  $J = 5.7$  Hz, 1H), 4.04 (t,  $J = 11.8$  Hz, 1H), 3.91 – 3.82 (m, 1H), 2.10 – 1.96 (m, 1H), 1.91 (d,  $J = 12.4$  Hz, 2H), 1.80 – 1.60 (m, 2H), 1.53 (d,  $J = 13.4$  Hz, 1H);  $^{13}C$  NMR (100 MHz,  $CDCl_3$ )  $\delta$  173.8, 143.9, 134.4, 130.2, 130.1, 127.9, 124.4, 122.9, 112.1, 108.4, 89.9, 63.0, 35.3, 26.5, 24.7, 19.3; HRMS (ESI)  $m/z$  calcd for  $C_{16}H_{17}NO_3$   $[M + Na]^+$ : 294.1101; Found: 294.1108.

***1'-methyl-spiro[2,3']6'-methyl-oxindole-spiro[2,2']tetrahydro-2H-pyran-2,5-dihydrofuran (2m)***

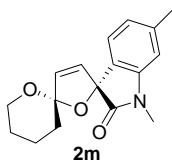

Yellow oil, (57 mg, 69%), IR (KBr) 2943, 2849, 1733, 1619, 1465, 1370, 1213, 1003, 978, 944, 807, 702  $\text{cm}^{-1}$ ;  $^1\text{H}$  NMR (400 MHz,  $\text{CDCl}_3$ )  $\delta$  6.91 (d,  $J = 7.5$  Hz, 1H), 6.78 (d,  $J = 7.5$  Hz, 1H), 6.57 (s, 1H), 6.06 (d,  $J = 5.7$  Hz, 1H), 5.71 (d,  $J = 5.7$  Hz, 1H), 4.02 – 3.92 (m, 1H), 3.79 (t,  $J = 9.7$  Hz, 1H), 3.10 (s, 3H), 2.31 (s, 3H), 1.96 – 1.92 (m, 1H), 1.89 – 1.77 (m, 2H), 1.69 – 1.55 (m, 2H), 1.45 (d,  $J = 13.1$  Hz, 1H);  $^{13}\text{C}$  NMR (100 MHz,  $\text{CDCl}_3$ )  $\delta$  174.1, 144.0, 140.7, 134.2, 130.4, 125.0, 124.1, 123.4, 111.9, 109.3, 89.8, 63.0, 35.3, 26.4, 24.7, 21.9, 19.3; HRMS (ESI)  $m/z$  calcd for  $\text{C}_{17}\text{H}_{19}\text{NO}_3$   $[\text{M} + \text{Na}]^+$ : 308.1257; Found: 308.1263.

***1'-ethyl-spiro[2,3']6'-methyl-oxindole-spiro[2,2'']tetrahydro-2H-pyran-2,5-dihydrofuran (2n)***

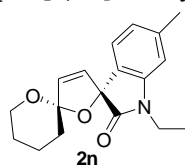

Colorless oil, (60 mg, 67%), IR (KBr) 2925, 2850, 1730, 1464, 1212, 1101, 947, 801, 748, 699  $\text{cm}^{-1}$ ;  $^1\text{H}$  NMR (400 MHz,  $\text{CDCl}_3$ )  $\delta$  6.91 (d,  $J = 7.5$  Hz, 1H), 6.77 (d,  $J = 7.5$  Hz, 1H), 6.59 (s, 1H), 6.06 (d,  $J = 5.7$  Hz, 1H), 5.71 (d,  $J = 5.7$  Hz, 1H), 3.97 (t,  $J = 11.2$  Hz, 1H), 3.79 (t,  $J = 7.5$  Hz, 1H), 3.68 – 3.61 (m, 2H), 2.31 (s, 3H), 1.93 – 1.89 (m, 1H), 1.83 (d,  $J = 12.6$  Hz, 2H), 1.67 (d,  $J = 5.1$  Hz, 2H), 1.51 – 1.39 (m, 1H), 1.20 (t,  $J = 7.3$  Hz, 3H);  $^{13}\text{C}$  NMR (100 MHz,  $\text{CDCl}_3$ )  $\delta$  173.7, 143.1, 140.6, 134.0, 130.5, 125.2, 124.3, 123.1, 112.0, 109.4, 89.9, 63.0, 35.3, 34.9, 24.7, 21.9, 19.4, 12.6; HRMS (ESI)  $m/z$  calcd for  $\text{C}_{18}\text{H}_{21}\text{NO}_3$   $[\text{M} + \text{Na}]^+$ : 322.1414; Found: 322.1416.

***1'-methyl-spiro[2,3']5'-methyl-oxindole-spiro[2,2'']tetrahydro-2H-pyran-2,5-dihydrofuran (2o)***

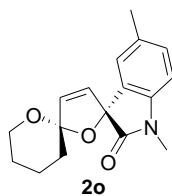

Colorless oil, (59 mg, 72%), IR (KBr) 2950, 2823, 1735, 1582, 1264, 939, 855, 747  $\text{cm}^{-1}$ ;  $^1\text{H}$  NMR (400 MHz,  $\text{CDCl}_3$ )  $\delta$  7.12 (d,  $J = 7.8$  Hz, 1H), 6.90 (s, 1H), 6.70 (d,  $J = 7.8$  Hz, 1H), 6.14 (d,  $J = 5.7$  Hz, 1H), 5.80 (d,  $J = 5.7$  Hz, 1H), 4.04 (t,  $J = 11.7$  Hz, 1H), 3.87 (d,  $J = 10.5$  Hz, 1H), 3.18 (s, 3H), 2.32 (s, 3H), 2.06 – 1.95 (m, 3H), 1.79 – 1.61 (m, 2H), 1.54 (d,  $J = 13.2$  Hz, 1H);  $^{13}\text{C}$  NMR (100 MHz,  $\text{CDCl}_3$ )  $\delta$  173.8, 141.5, 134.2, 132.5, 130.4, 130.4, 127.9, 125.1, 112.1, 108.1,

90.0, 63.0, 35.3, 26.5, 24.7, 21.0, 19.4; HRMS (ESI)  $m/z$  calcd for  $C_{17}H_{19}NO_3$   $[M + Na]^+$ : 308.1257; Found: 308.1264.

***1'-methyl-spiro[2,3']5',7'-dimethyl-oxindole-spiro[2,2']tetrahydro-2H-pyran-2,5-dihydrofuran (2p)***

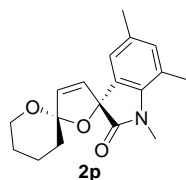

Colorless oil, (58 mg, 65%), IR (KBr) 2946, 2823, 1728, 1583, 1481, 1264, 944, 747  $cm^{-1}$ ;  $^1H$  NMR (400 MHz,  $CDCl_3$ )  $\delta$  6.88 (s, 1H), 6.75 (s, 1H), 6.15 (d,  $J = 5.7$  Hz, 1H), 5.80 (d,  $J = 5.7$  Hz, 1H), 4.06 (t,  $J = 11.7$  Hz, 1H), 3.89 (d,  $J = 10.5$  Hz, 1H), 3.47 (s, 3H), 2.53 (s, 3H), 2.28 (s, 3H), 2.12 – 1.87 (m, 3H), 1.82 – 1.71 (m, 2H), 1.56 (d,  $J = 13.3$  Hz, 1H);  $^{13}C$  NMR (100 MHz,  $CDCl_3$ )  $\delta$  174.5, 139.0, 134.3, 134.0, 132.4, 130.7, 128.6, 123.0, 119.8, 112.0, 89.6, 63.0, 35.3, 29.9, 24.7, 20.6, 19.4, 18.7; HRMS (ESI)  $m/z$  calcd for  $C_{18}H_{21}NO_3$   $[M + Na]^+$ : 322.1414; Found: 322.1416.

***1'-methyl-spiro[2,3']5'-(tert-butyl)-oxindole-spiro[2,2']tetrahydro-2H-pyran-2,5-dihydrofuran (2q)***

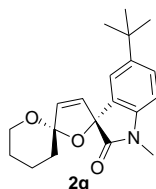

Yellow oil, (68 mg, 70%), IR (KBr) 2949, 2824, 1734, 1583, 1491, 1266, 942, 744  $cm^{-1}$ ;  $^1H$  NMR (400 MHz,  $CDCl_3$ )  $\delta$  7.41 (s, 1H), 7.36 (d,  $J = 8.1$  Hz, 1H), 6.77 (d,  $J = 8.1$  Hz, 1H), 6.15 (d,  $J = 5.7$  Hz, 1H), 5.85 (d,  $J = 5.7$  Hz, 1H), 3.99 (t,  $J = 11.5$  Hz, 1H), 3.85 (d,  $J = 8.9$  Hz, 1H), 3.21 (s, 3H), 2.21 (d,  $J = 9.8$  Hz, 1H), 1.96 (t,  $J = 9.5$  Hz, 2H), 1.78 – 1.69 (m, 2H), 1.56 (d,  $J = 12.6$  Hz, 1H), 1.32 (s, 9H);  $^{13}C$  NMR (100 MHz,  $CDCl_3$ )  $\delta$  174.8, 146.7, 141.0, 134.1, 130.6, 127.8, 126.5, 122.8, 112.1, 107.7, 90.3, 62.9, 34.6, 34.2, 31.4, 26.5, 24.8, 19.3; HRMS (ESI)  $m/z$  calcd for  $C_{20}H_{25}NO_3$   $[M + Na]^+$ : 350.1727; Found: 350.1730.

***1'-methyl-spiro[2,3']5'-methoxy-oxindole-spiro[2,2']tetrahydro-2H-pyran-2,5-dihydrofuran (2r)***

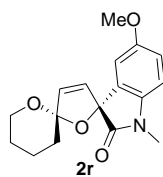

Yellow oil, (64 mg, 72%), IR (KBr) 2924, 2849, 1728, 1589, 1496, 1353, 1269, 1116, 1027, 980, 795, 747  $\text{cm}^{-1}$ ;  $^1\text{H}$  NMR (400 MHz,  $\text{CDCl}_3$ )  $\delta$  6.97 (d,  $J = 1.8$  Hz, 1H), 6.92 – 6.79 (m, 1H), 6.75 (d,  $J = 8.4$  Hz, 1H), 6.14 (d,  $J = 5.7$  Hz, 1H), 5.82 (d,  $J = 5.7$  Hz, 1H), 3.99 (t,  $J = 11.7$  Hz, 1H), 3.85 (s, 1H), 3.80 (s, 3H), 3.20 (s, 3H), 2.21 (d,  $J = 9.1$  Hz, 1H), 1.96 (d,  $J = 9.0$  Hz, 2H), 1.79 – 1.76 (m, 1H), 1.69 (d,  $J = 14.1$  Hz, 1H), 1.56 (d,  $J = 13.4$  Hz, 1H);  $^{13}\text{C}$  NMR (100 MHz,  $\text{CDCl}_3$ )  $\delta$  174.4, 156.6, 136.8, 134.2, 130.4, 129.3, 114.9, 112.3, 112.2, 108.7, 90.3, 63.1, 55.9, 34.3, 26.5, 24.8, 19.3; HRMS (ESI)  $m/z$  calcd for  $\text{C}_{17}\text{H}_{19}\text{NO}_4$   $[\text{M} + \text{Na}]^+$ : 324.1206; Found: 324.1212.

***1'-methyl-spiro[2,3']5'-fluoro-oxindole-spiro[2,2']tetrahydro-2H-pyran-2,5-dihydrofuran (2s)***

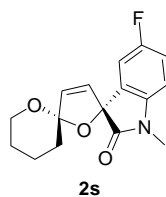

Yellow oil, (70 mg, 80%), m.p. = 127.9 – 128.5  $^\circ\text{C}$ , IR (KBr) 2945, 2846, 1733, 1493, 1266, 1190, 1002, 980, 802, 700  $\text{cm}^{-1}$ ;  $^1\text{H}$  NMR (400 MHz,  $\text{CDCl}_3$ )  $\delta$  7.00 (d,  $J = 7.4$  Hz, 1H), 6.95 (t,  $J = 8.8$  Hz, 1H), 6.72 – 6.61 (m, 1H), 6.06 (d,  $J = 5.7$  Hz, 1H), 5.71 (d,  $J = 5.7$  Hz, 1H), 3.87 (t,  $J = 11.0$  Hz, 1H), 3.75 (d,  $J = 7.8$  Hz, 1H), 3.12 (s, 3H), 2.09 (d,  $J = 8.1$  Hz, 1H), 1.85 (p,  $J = 13.1$  Hz, 2H), 1.68 (d,  $J = 11.0$  Hz, 1H), 1.61 (t,  $J = 7.1$  Hz, 1H), 1.47 (t,  $J = 12.8$  Hz, 1H);  $^{13}\text{C}$  NMR (100 MHz,  $\text{CDCl}_3$ )  $\delta$  174.4, 159.7, 139.2, 134.6, 129.9, 116.3, 113.5, 112.5, 108.9, 108.8, 89.9, 63.1, 34.2, 26.6, 24.7, 19.3; HRMS (ESI)  $m/z$  calcd for  $\text{C}_{16}\text{H}_{16}\text{FNO}_3$   $[\text{M} + \text{Na}]^+$ : 312.1006; Found: 312.1014.

***1'-methyl-spiro[2,3']6'-fluoro-oxindole-spiro[2,2']tetrahydro-2H-pyran-2,5-dihydrofuran (2t)***

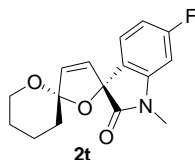

Yellow oil, (67 mg, 78%), IR (KBr) 2947, 2823, 1736, 1581, 1265, 932, 839, 746  $\text{cm}^{-1}$ ;  $^1\text{H}$  NMR (400 MHz,  $\text{CDCl}_3$ )  $\delta$  7.29 – 7.27 (m, 1H), 6.87 – 6.65 (m, 1H), 6.63 – 6.50 (m, 1H), 6.14 (d,  $J = 5.7$  Hz, 1H), 5.79 (d,  $J = 5.7$  Hz, 1H), 3.95 (t,  $J = 10.7$  Hz, 1H), 3.83 – 3.80 (m, 1H), 3.21 (s, 3H),

2.16 (t,  $J = 10.4$  Hz, 1H), 1.93 (q,  $J = 13.1$  Hz, 2H), 1.77 (d,  $J = 11.5$  Hz, 1H), 1.69 – 1.64 (m, 1H), 1.56 (d,  $J = 12.8$  Hz, 1H);  $^{13}\text{C}$  NMR (100 MHz,  $\text{CDCl}_3$ )  $\delta$  174.9, 164.3, 145.1, 134.5, 130.0, 126.8, 123.5, 112.3, 109.3, 97.2, 89.4, 63.1, 34.3, 26.6, 24.8, 19.3; HRMS (ESI)  $m/z$  calcd for  $\text{C}_{16}\text{H}_{16}\text{FNO}_3$  [ $\text{M} + \text{Na}$ ] $^+$ : 312.1006; Found: 312.1011.

***1'-methyl-spiro[2,3']oxindole-spiro[2,2']oxepane-2,5-dihydrofuran (2u)***

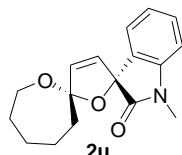

Yellow oil, (41 mg, 50%), IR (KBr) 2941, 2848, 1729, 1580, 1468, 1349, 1268, 1153, 955, 864, 747  $\text{cm}^{-1}$ ;  $^1\text{H}$  NMR (400 MHz,  $\text{CDCl}_3$ )  $\delta$  7.31 (t,  $J = 8.7$  Hz, 2H), 7.13 – 7.01 (m, 1H), 6.80 (d,  $J = 7.7$  Hz, 1H), 6.27 (d,  $J = 5.7$  Hz, 1H), 5.74 (d,  $J = 5.7$  Hz, 1H), 4.00 – 3.86 (m, 1H), 3.78 (d,  $J = 12.7$  Hz, 1H), 3.19 (s, 3H), 2.42-2.31 (m, 2H), 1.88 (d,  $J = 12.3$  Hz, 1H), 1.78 (d,  $J = 7.2$  Hz, 1H), 1.70 (d,  $J = 20.1$  Hz, 2H), 1.61 – 1.36 (m, 4H);  $^{13}\text{C}$  NMR (100 MHz,  $\text{CDCl}_3$ )  $\delta$  174.7, 143.4, 133.8, 130.0, 128.9, 128.2, 125.6, 123.2, 117.3, 108.2, 89.2, 64.1, 38.2, 30.9, 29.6, 26.4, 23.2; HRMS (ESI)  $m/z$  calcd for  $\text{C}_{17}\text{H}_{19}\text{NO}_3$  [ $\text{M} + \text{Na}$ ] $^+$ : 308.1257; Found: 308.1259.

## Characterization of 15a

***1'-methyl-spiro[2,3']oxindole-spiro[2,2']tetrahydrofuran-tetrahydrofuran (15a)***

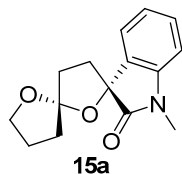

Yellow oil, (44 mg, 85%), IR (KBr) 2947, 2822, 1731, 1581, 1266, 936, 855, 746  $\text{cm}^{-1}$ ;  $^1\text{H}$  NMR (400 MHz,  $\text{CDCl}_3$ )  $\delta$  7.46 (d,  $J = 7.3$  Hz, 1H), 7.27 (d,  $J = 6.7$  Hz, 1H), 7.08 (t,  $J = 7.5$  Hz, 1H), 6.76 (d,  $J = 7.7$  Hz, 1H), 4.03 – 3.92 (m, 2H), 3.15 (s, 3H), 2.66 – 2.58 (m, 1H), 2.48 – 2.41 (m, 1H), 2.32 (dt,  $J = 19.9, 10.0$  Hz, 2H), 2.23 (dd,  $J = 11.9, 7.1$  Hz, 1H), 2.15 – 2.01 (m, 2H), 1.95 (dd,  $J = 20.7, 14.5$  Hz, 1H);  $^{13}\text{C}$  NMR (100 MHz,  $\text{CDCl}_3$ )  $\delta$  177.2, 143.5, 131.1, 129.4, 124.6, 123.3, 117.1, 108.0, 83.1, 67.2, 35.7, 35.3, 34.3, 26.0, 24.2; HRMS (ESI)  $m/z$  calcd for  $\text{C}_{15}\text{H}_{17}\text{NO}_3$  [ $\text{M} + \text{Na}$ ] $^+$ : 282.1101; Found: 282.1105.

## Characterization of 16a

*1'-methyl-spiro[2,3']oxindole-spiro[2,2']tetrahydrofuran-tetrahydrofuran-3,4-diol (16a)*

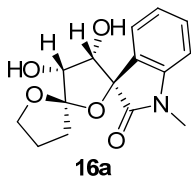

white solid, (45 mg, 78%), m.p. = 168.1 – 169.7 °C, IR (KBr) 2947, 2846, 1713, 1610, 1469, 1352, 1185, 1013, 967, 693 cm<sup>-1</sup>; <sup>1</sup>H NMR (400 MHz, CDCl<sub>3</sub>) δ 7.61 (d, *J* = 7.3 Hz, 1H), 7.29 (t, *J* = 7.8 Hz, 1H), 7.05 (t, *J* = 7.5 Hz, 1H), 6.76 (d, *J* = 7.7 Hz, 1H), 4.63 (d, *J* = 4.8 Hz, 1H), 4.42 (s, 1H), 4.16 – 3.99 (m, 1H), 3.95 – 3.73 (m, 2H), 3.22 (t, *J* = 17.7 Hz, 1H), 3.10 (s, 3H), 2.35 – 2.29 (m, 1H), 2.18 – 2.07 (m, 1H), 2.06 – 1.96 (m, 1H), 1.90 (s, 1H); <sup>13</sup>C NMR (100 MHz, CDCl<sub>3</sub>) δ 176.8, 144.2, 130.0, 127.3, 126.0, 122.9, 116.7, 108.2, 85.3, 75.9, 75.8, 68.5, 32.5, 26.4, 23.6; HRMS (ESI) *m/z* calcd for C<sub>15</sub>H<sub>17</sub>NO<sub>5</sub> [M + Na]<sup>+</sup>: 314.0999; Found: 314.1003.

## Characterization of 20a

*N-(2-bromophenyl)-5-(3-((tert-butyldimethylsilyl)oxy)propyl)-N-methylfuran-2-carboxamid (20a)*

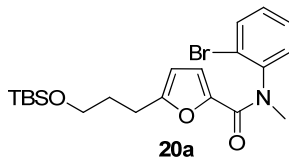

Yellow oil, (903 mg, 68%), IR (KBr) 2923, 2849, 1734, 1582, 1475, 1264, 1155, 969, 747 cm<sup>-1</sup>; <sup>1</sup>H NMR (400 MHz, CDCl<sub>3</sub>) δ 7.65 (d, *J* = 7.9 Hz, 1H), 7.34 (t, *J* = 7.5 Hz, 1H), 7.29 – 7.16 (m, 2H), 6.08 (s, 1H), 5.85 (s, 1H), 3.48 (t, *J* = 5.7 Hz, 2H), 3.33 (s, 3H), 2.50 (t, *J* = 6.9 Hz, 2H), 1.66 – 1.53 (m, 2H), 0.86 (s, 9H), 0.00 (s, 6H); <sup>13</sup>C NMR (100 MHz, CDCl<sub>3</sub>) δ 159.2, 158.6, 145.6, 143.3, 133.6, 130.0, 129.4, 128.6, 123.5, 117.4, 107.0, 61.8, 37.0, 30.2, 25.9, 24.4, 18.2, -5.3; HRMS (ESI) *m/z* calcd for C<sub>21</sub>H<sub>30</sub>BrNO<sub>3</sub>Si [M + Na]<sup>+</sup>: 474.1071; Found: 474.1058.

## Characterization of 21a

*5-(3-((tert-butyldimethylsilyl)oxy)propylidene)-1'-methyl-5H-spiro[furan-2,3'-indolin]-2'-one (21a)*



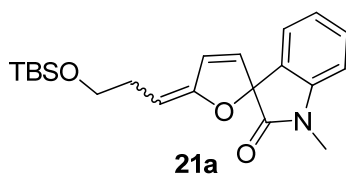

Yellow oil, (94 mg, 85%), IR (KBr) 2948, 2823, 1728, 1578, 1266, 945, 747  $\text{cm}^{-1}$ ;  $^1\text{H}$  NMR (400 MHz,  $\text{CDCl}_3$ )  $\delta$  7.38 (t,  $J = 7.7$  Hz, 1H), 7.21 (d,  $J = 7.2$  Hz, 1H), 7.09 (t,  $J = 7.4$  Hz, 1H), 6.87 (d,  $J = 7.7$  Hz, 1H), 6.50 (d,  $J = 5.6$  Hz, 1H), 5.91 (d,  $J = 5.6$  Hz, 1H), 4.65 (t,  $J = 7.4$  Hz, 1H), 3.67 (t,  $J = 5.7$  Hz, 2H), 3.23 (s, 3H), 2.48 – 2.35 (m, 2H), 0.90 (s, 9H), 0.06 (s, 6H);  $^{13}\text{C}$  NMR (100 MHz,  $\text{CDCl}_3$ )  $\delta$  173.1, 158.8, 143.6, 130.6, 129.9, 129.0, 126.8, 125.0, 123.2, 108.5, 96.7, 90.9, 62.8, 29.2, 26.5, 25.9, 18.3, -5.2; HRMS (ESI)  $m/z$  calcd for  $\text{C}_{21}\text{H}_{29}\text{NO}_3\text{Si}$  [ $\text{M} + \text{Na}$ ] $^+$ : 394.1809; Found: 394.1810.

## Characterization of 22a

*5-(3-hydroxypropylidene)-1'-methyl-5H-spiro[furan-2,3'-indolin]-2'-one (22a)*

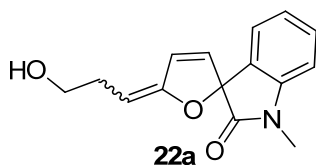

Yellow oil, (55 mg, 87%), IR (KBr) 2948, 2825, 1726, 1580, 1471, 1348, 1265, 944, 857, 750  $\text{cm}^{-1}$ ;  $^1\text{H}$  NMR (400 MHz,  $\text{CDCl}_3$ )  $\delta$  7.36 (t,  $J = 7.7$  Hz, 1H), 7.20 (d,  $J = 7.2$  Hz, 1H), 7.08 (t,  $J = 7.5$  Hz, 1H), 6.86 (d,  $J = 7.8$  Hz, 1H), 6.50 (d,  $J = 5.7$  Hz, 1H), 5.92 (d,  $J = 5.7$  Hz, 1H), 4.64 (t,  $J = 7.6$  Hz, 1H), 3.67 (t,  $J = 5.7$  Hz, 2H), 3.21 (s, 3H), 2.49 – 2.37 (m, 2H), 1.89 (s, 1H);  $^{13}\text{C}$  NMR (100 MHz,  $\text{CDCl}_3$ )  $\delta$  173.0, 159.8, 143.6, 130.8, 130.4, 128.9, 126.5, 125.0, 123.4, 108.7, 96.1, 91.0, 62.4, 29.1, 26.6; HRMS (ESI)  $m/z$  calcd for  $\text{C}_{15}\text{H}_{15}\text{NO}_3$  [ $\text{M} + \text{Na}$ ] $^+$ : 280.0944; Found: 280.0945.

## Characterization of 12

*Furan-2-carboxylic acid (2-bromo-phenyl)-ethyl-amide (12a)*

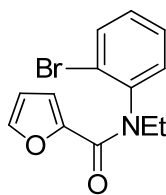

**12a**

White solid (747mg, 85%), m.p. = 70.3–72.8 °C, IR (KBr) 2986, 2833, 1730, 1620, 1453, 1260, 1020, 758  $\text{cm}^{-1}$ ;  $^1\text{H}$  NMR (400 MHz,  $\text{CDCl}_3$ )  $\delta$  7.60 (d,  $J = 7.9$  Hz, 1H), 7.33–7.28 (m, 1H), 7.19 (t,  $J = 7.7$  Hz, 3H), 6.12 (br, 1H), 5.78 (br, 1H), 4.17 - 4.08 (m, 1H), 3.46–3.41 (m, 1H), 1.14 (t,  $J = 7.1$  Hz, 3H);  $^{13}\text{C}$  NMR (101 MHz,  $\text{CDCl}_3$ )  $\delta$  158.7, 147.2, 144.4, 141.1, 133.8, 131.1, 129.7, 128.4, 124.1, 115.7, 111.0, 44.4, 12.5; HRMS (ESI)  $m/z$  calcd for  $\text{C}_{13}\text{H}_{12}\text{BrNO}_2$   $[\text{M}+\text{Na}]^+$ : 315.99585, Found: 315.99585.

***Furan-2-carboxylic acid (2-bromo-4-methyl-phenyl)-ethyl-amide(12b)***

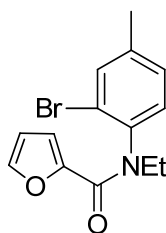

**12b**

White solid (810 mg, 88%), m.p. = 106.2–108.8 °C, IR (KBr) 2976, 1735, 1640, 1458, 1250, 880  $\text{cm}^{-1}$ ;  $^1\text{H}$  NMR (400 MHz,  $\text{CDCl}_3$ )  $\delta$  7.51 (s, 1H), 7.33 (s, 1H), 7.18–7.12 (m, 2H), 6.20 (br, 1H), 5.81 (br, 1H), 4.25–4.18 (m, 1H), 3.55–3.47 (m, 1H), 2.40 (s, 3H), 1.21 (t,  $J = 7.0$  Hz, 3H);  $^{13}\text{C}$  NMR (101 MHz,  $\text{CDCl}_3$ )  $\delta$  158.8, 147.1, 144.3, 140.2, 138.4, 134.2, 130.7, 129.2, 123.7, 115.6, 111.00, 44.4, 20.8, 12.6; HRMS (ESI)  $m/z$  calcd for  $\text{C}_{14}\text{H}_{14}\text{BrNO}_2$   $[\text{M}+\text{Na}]^+$ : 330.01151, Found: 330.01151.

***Furan-2-carboxylic acid (2-bromo-5-methyl-phenyl)-ethyl-amide (12c)***

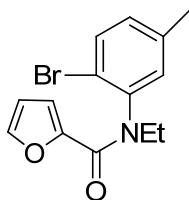

**12c**

White solid (801 mg, 87%), m.p. = 106.7–108.5 °C, IR (KBr) 2945, 1745, 1650, 1240, 1040, 885  $\text{cm}^{-1}$ ;  $^1\text{H}$  NMR (400 MHz,  $\text{CDCl}_3$ )  $\delta$  7.54 (d,  $J$  = 8.5 Hz, 1H), 7.32 (s, 1H), 7.08 (s, 2H), 6.20 (br, 1H), 5.81 (br, 1H), 4.21–4.12 (m, 1H), 3.57–3.52 (m, 6.8 Hz, 1H), 2.34 (s, 3H), 1.23 (t,  $J$  = 7.2 Hz, 3H);  $^{13}\text{C}$  NMR (101 MHz,  $\text{CDCl}_3$ )  $\delta$  158.7, 147.2, 144.3, 140.8, 138.8, 133.4, 131.6, 130.6, 120.6, 115.6, 111.0, 44.5, 20.8, 12.6; HRMS (ESI)  $m/z$  calcd for  $\text{C}_{14}\text{H}_{14}\text{BrNO}_2$   $[\text{M}+\text{Na}]^+$ : 330.01166, Found: 330.01169.

***Furan-2-carboxylic acid (2-bromo-4,6-dimethyl-phenyl)-ethyl-amide (12d)***

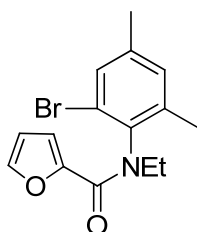

**12d**

White solid (869 mg, 90%), m.p. = 108.7–109.8 °C, IR (KBr) 2978, 1764, 1620, 1458, 1265, 1002. 865  $\text{cm}^{-1}$ ;  $^1\text{H}$  NMR (400 MHz,  $\text{CDCl}_3$ )  $\delta$  7.35 (s, 2H), 7.05 (s, 1H), 6.37–6.09 (m, 1H), 5.72 (d,  $J$  = 3.1 Hz, 1H), 3.90–3.95 (m, 1H), 3.74–3.79 (m, 1H), 2.35 (s, 3H), 2.20 (s, 3H), 1.24 (t,  $J$  = 7.2 Hz, 3H);  $^{13}\text{C}$  NMR (101 MHz,  $\text{CDCl}_3$ )  $\delta$  159.1, 147.3, 144.4, 139.9, 138.8, 137.4, 131.9, 131.2, 124.6, 114.8, 111.1, 44.6, 20.8, 18.8, 12.7; HRMS (ESI)  $m/z$  calcd for  $\text{C}_{15}\text{H}_{16}\text{BrNO}_2$   $[\text{M}+\text{Na}]^+$ : 344.02728, Found: 344.02728.

***Furan-2-carboxylic acid (2-bromo-4-tert-butyl-phenyl)-ethyl-amide (12e)***

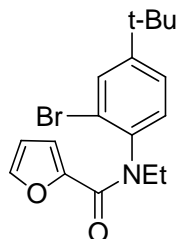

**12e**

White solid (932 mg, 89%), m.p. = 106.1–108.3 °C, IR (KBr) 2965, 1729, 1646, 1475, 1121, 1019, 931, 830  $\text{cm}^{-1}$ ;  $^1\text{H}$  NMR (400 MHz,  $\text{CDCl}_3$ )  $\delta$  7.67 (d,  $J$  = 2.1 Hz, 1H), 7.37 (dd,  $J$  = 8.2, 2.2 Hz, 1H), 7.32 (s, 1H), 7.17 (d,  $J$  = 8.2 Hz, 1H), 6.20 (br, 1H), 5.75 (br, 1H), 4.19–4.24 (m, 1H), 3.47–3.52 (m, 1H), 1.35 (s, 9H), 1.23 (t,  $J$  = 7.2 Hz, 3H);  $^{13}\text{C}$  NMR (101 MHz,  $\text{CDCl}_3$ )  $\delta$  158.8,

153.7, 147.3, 144.3, 138.4, 130.8, 130.5, 125.5, 123.7, 115.4, 111.0, 44.1, 34.8, 31.2, 12.7; HRMS (ESI)  $m/z$  calcd for  $C_{17}H_{20}BrNO_2 [M+Na]^+$ : 372.05856, Found: 372.05856.

***Furan-2-carboxylic acid (2-bromo-4-methoxy-phenyl)-ethyl-amide (12f)***

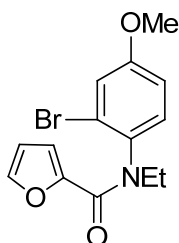

**12f**

White solid (853 mg, 88%), m.p. = 105.2–107.8 °C, IR (KBr) 2995, 1733, 1623, 1480, 1268, 1023, 872  $cm^{-1}$ ;  $^1H$  NMR (400 MHz,  $CDCl_3$ )  $\delta$  7.35 (s, 1H), 7.23 (s, 1H), 7.17 (d,  $J$  = 8.6 Hz, 1H), 6.91 (d,  $J$  = 8.5 Hz, 1H), 6.23 (br, 1H), 5.82 (br, 1H), 4.19–4.24 (m, 1H), 3.86 (s, 3H), 3.45–3.50 (m, 1H), 1.23 (t,  $J$  = 7.0 Hz, 3H);  $^{13}C$  NMR (101 MHz,  $CDCl_3$ )  $\delta$  159.8, 159.0, 147.3, 144.4, 133.8, 131.5, 124.6, 118.8, 115.5, 114.1, 111.0, 55.8, 44.4, 12.6; HRMS  $m/z$  (ESI) calcd for  $C_{14}H_{14}BrNO_3 [M+Na]^+$ : 346.00625, Found: 346.00625.

***Furan-2-carboxylic acid (2-bromo-4-fluoro-phenyl)-ethyl-amide (12g)***

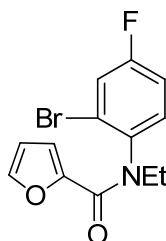

**12g**

White solid (774 mg, 83%), m.p. = 126.2–127.5 °C, IR (KBr) 2942, 1721, 1610, 1435, 1253, 1045, 875  $cm^{-1}$ ;  $^1H$  NMR (400 MHz,  $CDCl_3$ )  $\delta$  7.43 (d,  $J$  = 7.3 Hz, 1H), 7.29 (s, 1H), 7.27–7.23 (m, 1H), 7.10 (t,  $J$  = 8.1 Hz, 1H), 6.25 (br, 1H), 6.08 (br, 1H), 4.24–4.16 (m, 1H), 3.52–3.57 (m, 1H), 1.22 (t,  $J$  = 7.1 Hz, 3H);  $^{13}C$  NMR (101 MHz,  $CDCl_3$ )  $\delta$  161.6, 158.8, 147.3, 144.5, 137.6, 132.0, 124.7, 121.0, 116.0, 115.5, 111.1, 44.5, 12.6; HRMS (ESI)  $m/z$  calcd for  $C_{13}H_{11}BrFNO_2 [M+Na]^+$ : 333.98642, Found: 333.98654.

***Furan-2-carboxylic acid (2-bromo-5-fluoro-phenyl)-ethyl-amide (12h)***

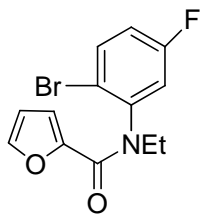

**12h**

White solid (784 mg, 84%), m.p. = 125.9–127.8 °C, IR (KBr) 2972, 1746, 1650, 1433, 1273, 885  $\text{cm}^{-1}$ ;  $^1\text{H}$  NMR (400 MHz,  $\text{CDCl}_3$ )  $\delta$  7.65–7.61 (m, 1H), 7.29 (s, 1H), 7.03 (dd,  $J = 5.6, 3.2$  Hz, 2H), 6.27 (br, 1H), 6.20 (br, 1H), 4.21–4.12 (m, 1H), 3.60–3.55 (m, 1H), 1.25 (d,  $J = 7.1$  Hz, 3H);  $^{13}\text{C}$  NMR (101 MHz,  $\text{CDCl}_3$ )  $\delta$  161.9, 158.5, 147.2, 144.6, 142.6, 134.5, 118.5, 118.3, 117.1, 116.5, 111.2, 44.6, 12.7; HRMS (ESI)  $m/z$  calcd for  $\text{C}_{13}\text{H}_{11}\text{BrFNO}_2$   $[\text{M}+\text{Na}]^+$ : 333.68957, Found: 333.68957.

## Characterization of 13

### *1'-Ethyl-5-methoxy-5H-spiro[furan-2,3'-indolin]-2'-one (13a)*

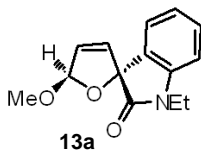

Yellow oil, (53 mg, 72%), IR (KBr) 2986, 2928, 1724, 1608, 1463, 1201, 943, 857, 757  $\text{cm}^{-1}$ ;  $^1\text{H}$  NMR (400 MHz,  $\text{CDCl}_3$ )  $\delta$  7.32 (t,  $J = 7.6$  Hz, 1H), 7.12 (d,  $J = 7.2$  Hz, 1H), 7.04 (t,  $J = 7.4$  Hz, 1H), 6.85 (d,  $J = 7.8$  Hz, 1H), 6.20 (s, 2H), 5.95 (d,  $J = 5.4$  Hz, 1H), 3.78–3.72 (m, 2H), 3.55 (s, 3H), 1.28 (t,  $J = 7.1$  Hz, 3H);  $^{13}\text{C}$  NMR (101 MHz,  $\text{CDCl}_3$ )  $\delta$  173.2, 143.0, 132.5, 130.3, 129.9, 127.7, 124.5, 122.9, 110.5, 108.7, 89.6, 54.1, 35.0, 12.5; HRMS  $m/z$  (ESI) calculated for  $\text{C}_{14}\text{H}_{15}\text{NO}_3$   $[\text{M}+\text{Na}]^+$ : 268.09558; Found: 268.09558.

### *1'-Ethyl-5-methoxy-5'-methyl-5H-spiro[furan-2,3'-indolin]-2'-one (13b)*

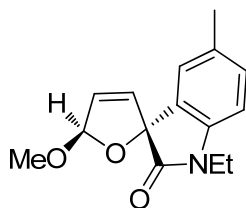

**13b**

Yellow oil, (54 mg, 70%), IR (KBr) 3087, 2977, 1726, 1615, 1494, 1372, 1210, 948, 875, 747  $\text{cm}^{-1}$ ;  $^1\text{H}$  NMR (400 MHz,  $\text{CDCl}_3$ )  $\delta$  7.11 (d,  $J = 7.9$  Hz, 1H), 6.95 (s, 1H), 6.74 (d,  $J = 7.9$  Hz, 1H), 6.19 (d,  $J = 7.1$  Hz, 2H), 5.94 (d,  $J = 5.7$  Hz, 1H), 3.75-3.70 (m, 2H), 3.55 (s, 3H), 2.30 (s, 3H), 1.27 (t,  $J = 7.1$  Hz, 3H);  $^{13}\text{C}$  NMR (101 MHz,  $\text{CDCl}_3$ )  $\delta$  173.1, 140.5, 132.7, 132.5, 130.5, 129.7, 127.6, 125.2, 110.5, 108.4, 89.7, 54.1, 35.0, 20.9, 12.5; HRMS  $m/z$  (ESI) calculated for  $\text{C}_{15}\text{H}_{17}\text{NO}_3$   $[\text{M}+\text{Na}]^+$ : 282.11124; Found: 282.11124.

***1'-Ethyl-5-methoxy-6'-methyl-5H-spiro[furan-2,3'-indolin]-2'-one (13c)***

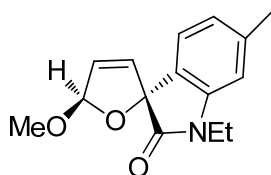

**13c**

Yellow oil, (47 mg, 60%), IR (KBr) 2977, 1727, 1619, 1455, 1203, 947, 816, 748  $\text{cm}^{-1}$ ;  $^1\text{H}$  NMR (400 MHz,  $\text{CDCl}_3$ )  $\delta$  7.00 (d,  $J = 7.4$  Hz, 1H), 6.85 (d,  $J = 7.5$  Hz, 1H), 6.67 (s, 1H), 6.18 (s, 2H), 5.93 (d,  $J = 5.8$  Hz, 1H), 3.76-3.70 (m, 2H), 3.54 (s, 3H), 2.38 (s, 3H), 1.28 (t,  $J = 7.1$  Hz, 3H);  $^{13}\text{C}$  NMR (101 MHz,  $\text{CDCl}_3$ )  $\delta$  173.5, 143.1, 140.7, 132.7, 129.7, 124.7, 124.2, 123.3, 110.4, 109.5, 89.5, 54.1, 34.9, 21.9, 12.6; HRMS  $m/z$  (ESI) calculated for  $\text{C}_{15}\text{H}_{17}\text{NO}_3$   $[\text{M}+\text{Na}]^+$ : 282.11108; Found: 282.11115.

***1'-Ethyl-5,5'-dimethoxy-5H-spiro[furan-2,3'-indolin]-2'-one (13d)***

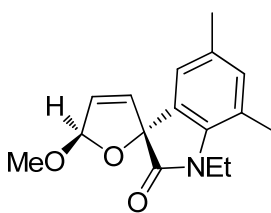

**13d**

Yellow oil, (41 mg, 50%), IR (KBr) 2985, 2925, 1722, 1645, 1473, 1342, 1266, 1224, 949, 862  $\text{cm}^{-1}$ ;  $^1\text{H}$  NMR (400 MHz,  $\text{CDCl}_3$ )  $\delta$  6.87 (s, 1H), 6.77 (s, 1H), 6.25 – 6.08 (m, 2H), 5.91 (d,  $J = 5.5$  Hz, 1H), 3.98-3.92 (m, 2H), 3.55 (s, 3H), 2.47 (s, 3H), 2.25 (s, 3H), 1.28 (t,  $J = 7.2$  Hz, 3H);  $^{13}\text{C}$  NMR (101 MHz,  $\text{CDCl}_3$ )  $\delta$  174.2, 138.3, 134.5, 133.0, 132.4, 129.4, 128.5, 123.0, 119.4, 110.4, 89.3, 54.0, 36.8, 20.5, 18.6, 14.6; HRMS  $m/z$  (ESI) Calculated for  $\text{C}_{16}\text{H}_{19}\text{NO}_3$   $[\text{M}+\text{Na}]^+$ : 296.12686; Found: 296.12692.

**5'-(Tert-butyl)-1'-ethyl-5-methoxy-5H-spiro[furan-2,3'-indolin]-2'-one (13e)**

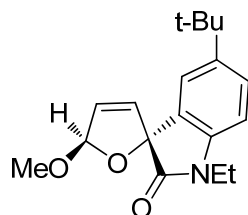

**13e**

Yellow oil, (58 mg, 64%), IR (KBr) 2962, 2915, 1728, 1619, 1494, 1372, 1206, 948, 876, 744  $\text{cm}^{-1}$ ;  $^1\text{H}$  NMR (400 MHz,  $\text{CDCl}_3$ )  $\delta$  7.35-7.33 (m, 1H), 7.14 (d,  $J = 1.9$  Hz, 1H), 6.78 (d,  $J = 8.2$  Hz, 1H), 6.21 (d,  $J = 5.6$  Hz, 2H), 5.96 (d,  $J = 5.4$  Hz, 1H), 3.75-3.72 (m, 2H), 3.56 (s, 3H), 1.29 (d,  $J = 8.2$  Hz, 12H);  $^{13}\text{C}$  NMR (101 MHz,  $\text{CDCl}_3$ )  $\delta$  173.3, 146.2, 140.6, 132.8, 129.8, 127.2, 127.0, 121.5, 110.5, 108.2, 89.9, 54.3, 35.0, 34.5, 31.5, 12.6; HRMS  $m/z$  (ESI) calculated for  $\text{C}_{18}\text{H}_{23}\text{NO}_3$   $[\text{M}+\text{Na}]^+$ : 324.15839; Found: 324.15839.

**1'-Ethyl-5-methoxy-5',7'-dimethyl-5H-spiro[furan-2,3'-indolin]-2'-one and (13f)**

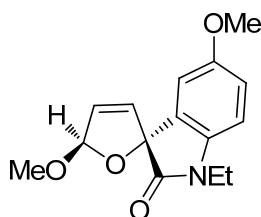

**13f**

Yellow oil, (52 mg, 63%), IR (KBr) 2936, 2836, 1723, 1603, 1492, 1344, 1279, 1103, 1031, 946, 862, 703, 627  $\text{cm}^{-1}$ ;  $^1\text{H}$  NMR (400 MHz,  $\text{CDCl}_3$ )  $\delta$  6.86-6.83 (m, 1H), 6.76 (d,  $J = 8.5$  Hz, 1H), 6.73 (d,  $J = 2.5$  Hz, 1H), 6.20-6.19 (m, 2H), 5.96-5.94 (m, 1H), 3.77 (s, 3H), 3.77-3.71 (m, 2H), 3.55 (s, 3H), 1.27 (t,  $J = 7.2$  Hz, 3H);  $^{13}\text{C}$  NMR (101 MHz,  $\text{CDCl}_3$ )  $\delta$  172.9, 156.3, 136.2, 132.6, 129.8, 128.9, 115.0, 111.4, 110.6, 109.2, 89.9, 55.9, 54.2, 35.1, 12.5; HRMS  $m/z$  (ESI) calculated for  $\text{C}_{15}\text{H}_{17}\text{NO}_4$   $[\text{M}+\text{Na}]^+$ : 298.10620; Found: 298.10617.

**1'-Ethyl-5'-fluoro-5-methoxy-5H-spiro[furan-2,3'-indolin]-2'-one (13g)**

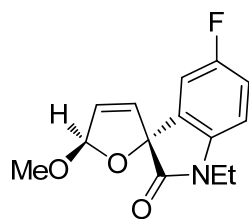

**13g**

Yellow oil, (52 mg, 66%), IR (KBr) 3086, 2936, 1728, 1615, 1489, 1343, 1266, 1102, 1024, 946, 878, 734  $\text{cm}^{-1}$ ;  $^1\text{H}$  NMR (400 MHz,  $\text{CDCl}_3$ )  $\delta$  7.02 (t,  $J = 8.8$  Hz, 1H), 6.87 (d,  $J = 7.4$  Hz, 1H), 6.80-6.77 (m, 1H), 6.26-6.17 (m, 2H), 5.94 (d,  $J = 5.8$  Hz, 1H), 3.73-3.75 (m, 2H), 3.55 (s, 3H), 1.28 (t,  $J = 6.8$  Hz, 3H);  $^{13}\text{C}$  NMR (101 MHz,  $\text{CDCl}_3$ )  $\delta$  173.0, 159.3, 138.8, 132.1, 130.27, 129.38, 116.5, 112.6, 110.66, 109.3, 89.5, 54.2, 35.2, 12.4; HRMS  $m/z$  (ESI) calculated for  $\text{C}_{14}\text{H}_{14}\text{FNO}_3$   $[\text{M}+\text{Na}]^+$ : 286.08615; Found: 286.08606.

***1'-Ethyl-6'-fluoro-5-methoxy-5H-spiro[furan-2,3'-indolin]-2'-one (13h)***

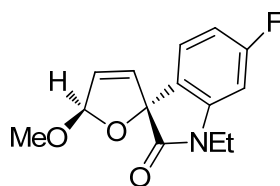

**13h**

Yellow oil, (57 mg, 72%), IR (KBr) 2980, 2937, 1733, 1614, 1499, 1545, 1374, 1200, 953, 830, 742  $\text{cm}^{-1}$ ;  $^1\text{H}$  NMR (400 MHz,  $\text{CDCl}_3$ )  $\delta$  7.13 – 7.03 (m, 1H), 6.72 (t,  $J = 8.8$  Hz, 1H), 6.59 (d,  $J = 8.9$  Hz, 1H), 6.21 (d,  $J = 5.8$  Hz, 1H), 6.17 (s, 1H), 5.92 (d,  $J = 5.8$  Hz, 1H), 3.71-3.75 (m, 2H), 3.54 (s, 3H), 1.28 (t,  $J = 7.2$  Hz, 3H);  $^{13}\text{C}$  NMR (101 MHz,  $\text{CDCl}_3$ )  $\delta$  173.5, 163.13, 144.64, 132.23, 130.15, 125.9, 122.97, 110.50, 108.9, 97.6, 89.1, 54.3, 35.3, 12.5; HRMS  $m/z$  (ESI) calculated for  $\text{C}_{14}\text{H}_{14}\text{FNO}_3$   $[\text{M}+\text{Na}]^+$ : 286.08618; Found: 286.08615.

***5-Ethoxy-1'-ethyl-5H-spiro[furan-2,3'-indolin]-2'-one (13i)***

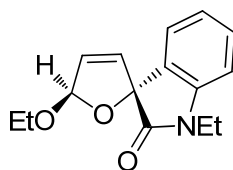

**13i**



Yellow oil, (54 mg, 69%), IR (KBr) 2977, 2932, 1728, 1611, 1463, 1359, 1290, 940, 859, 753  $\text{cm}^{-1}$ ;  $^1\text{H}$  NMR (400 MHz,  $\text{CDCl}_3$ )  $\delta$  7.31 (t,  $J = 7.3$  Hz, 1H), 7.12 (d,  $J = 7.1$  Hz, 1H), 7.04 (t,  $J = 7.3$  Hz, 1H), 6.84 (d,  $J = 7.7$  Hz, 1H), 6.26 (s, 1H), 6.21 (d,  $J = 5.6$  Hz, 1H), 5.93 (d,  $J = 5.6$  Hz, 1H), 3.88-3.83 (dd,  $J = 13.4, 6.7$  Hz, 2H), 3.75 (q,  $J = 7.1$  Hz, 2H), 1.28 (t,  $J = 7.0$  Hz, 6H);  $^{13}\text{C}$  NMR (101 MHz,  $\text{CDCl}_3$ )  $\delta$  173.2, 143.0, 132.2, 130.2, 130.2, 127.8, 124.5, 122.8, 109.6, 108.6, 89.6, 62.6, 35.0, 15.4, 12.6; HRMS  $m/z$  (ESI) calculated for  $\text{C}_{15}\text{H}_{17}\text{NO}_3$   $[\text{M}+\text{Na}]^+$ : 282.11115, Found: 282.11121.

**5-Ethoxy-1'-ethyl-5'-methyl-5H-spiro[furan-2,3'-indolin]-2'-one (13j)**

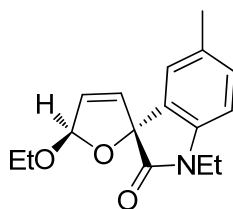

**13j**

Yellow oil, (44 mg 54%), IR (KBr) 2978, 2930, 1728, 1633, 1493, 1372, 1251, 1105, 943, 812, 738  $\text{cm}^{-1}$ ;  $^1\text{H}$  NMR (400 MHz,  $\text{CDCl}_3$ )  $\delta$  7.11 (d,  $J = 7.9$  Hz, 1H), 6.94 (s, 1H), 6.73 (d,  $J = 7.9$  Hz, 1H), 6.26 (s, 1H), 6.19 (d,  $J = 5.8$  Hz, 1H), 5.92 (d,  $J = 5.8$  Hz, 1H), 3.86-3.83 (m, 2H), 3.76-3.70 (m, 2H), 2.30 (s, 3H), 1.29-1.25 (m, 6H);  $^{13}\text{C}$  NMR (101 MHz,  $\text{CDCl}_3$ )  $\delta$  173.2, 140.5, 132.4, 130.4, 130.0, 128.3, 127.7, 125.2, 109.6, 108.4, 89.7, 62.5, 35.0, 20.9, 15.4, 12.6; HRMS  $m/z$  (ESI) calculated for  $\text{C}_{16}\text{H}_{19}\text{NO}_3$   $[\text{M}+\text{Na}]^+$ : 296.12701; Found: 296.12695.

**5-Ethoxy-1'-ethyl-6'-methyl-5H-spiro[furan-2,3'-indolin]-2'-one (13k)**

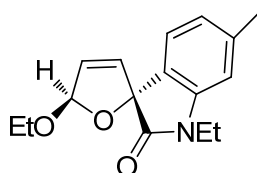

**13k**

Yellow oil, (46 mg, 56%), IR (KBr) 2977, 2930, 1728, 1619, 1452, 1212, 1024, 944, 833, 752  $\text{cm}^{-1}$ ;  $^1\text{H}$  NMR (400 MHz,  $\text{CDCl}_3$ )  $\delta$  7.00 (d,  $J = 7.5$  Hz, 1H), 6.84 (d,  $J = 7.5$  Hz, 1H), 6.66 (s, 1H), 6.24 (s, 1H), 6.18 (d,  $J = 5.8$  Hz, 1H), 5.91 (d,  $J = 5.8$  Hz, 1H), 3.85-3.83 (m, 2H), 3.73 (q,  $J$

= 7.1 Hz, 2H), 2.38 (s, 3H), 1.27 (t,  $J = 7.1$  Hz, 6H);  $^{13}\text{C}$  NMR (101 MHz,  $\text{CDCl}_3$ )  $\delta$  173.5, 143.1, 140.6, 132.4, 130.0, 124.8, 124.2, 123.3, 109.5, 109.5, 89.5, 62.5, 34.9, 22.0, 15.4, 12.6; HRMS  $m/z$  (ESI) calculated for  $\text{C}_{16}\text{H}_{19}\text{NO}_3$   $[\text{M}+\text{Na}]^+$ : 296.12689; Found: 296.12704.

**5-Ethoxy-1'-ethyl-5',7'-dimethyl-5H-spiro[furan-2,3'-indolin]-2'-one (13l)**

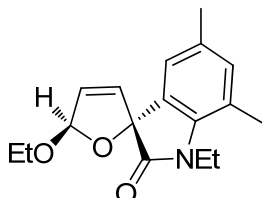

**13l**

Yellow oil, (35 mg, 40%), IR (KBr) 2979, 2933, 1730, 1619, 1488, 1266, 1020, 942, 879, 758  $\text{cm}^{-1}$ ;  $^1\text{H}$  NMR (400 MHz,  $\text{CDCl}_3$ )  $\delta$  6.86 (s, 1H), 6.77 (s, 1H), 6.25 (s, 1H), 6.17 (d,  $J = 6.0$  Hz, 1H), 5.89 (d,  $J = 5.8$  Hz, 1H), 3.97-3.90 (m, 2H), 3.88 – 3.68 (m, 2H), 2.47 (s, 3H), 2.25 (s, 3H), 1.27 (t,  $J = 7.0$  Hz, 6H);  $^{13}\text{C}$  NMR (101 MHz,  $\text{CDCl}_3$ )  $\delta$  174.3, 138.3, 134.5, 132.7, 132.4, 129.7, 128.6, 123.0, 119.4, 109.6, 89.3, 62.5, 36.8, 20.5, 18.6, 15.4, 14.6; HRMS  $m/z$  (ESI) calculated for  $\text{C}_{17}\text{H}_{21}\text{NO}_3$   $[\text{M}+\text{Na}]^+$ : 310.10264; Found: 310.10274.

**5'-(Tert-butyl)-5-ethoxy-1'-ethyl-5H-spiro[furan-2,3'-indolin]-2'-one (13m)**

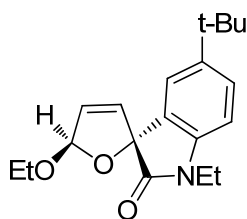

**13m**

Yellow oil, (54 mg, 57%), IR (KBr) 2977, 2934, 1724, 1639, 1494, 1275, 1209, 1030, 942, 878, 742  $\text{cm}^{-1}$ ;  $^1\text{H}$  NMR (400 MHz,  $\text{CDCl}_3$ )  $\delta$  7.33 (d,  $J = 8.2$  Hz, 1H), 7.13 (s, 1H), 6.78 (d,  $J = 8.2$  Hz, 1H), 6.28 (s, 1H), 6.21 (d,  $J = 5.8$  Hz, 1H), 5.94 (d,  $J = 5.8$  Hz, 1H), 3.87-3.83 (m, 2H), 3.73 (q,  $J = 7.1$  Hz, 2H), 1.28 (d,  $J = 10.4$  Hz, 15H);  $^{13}\text{C}$  NMR (101 MHz,  $\text{CDCl}_3$ )  $\delta$  173.3, 146.2, 140.6, 132.5, 130.1, 127.3, 126.9, 121.5, 109.6, 108.1, 89.9, 62.7, 35.0, 34.5, 31.5, 15.4, 12.6; HRMS  $m/z$  (ESI) calculated for  $\text{C}_{19}\text{H}_{25}\text{NO}_3$   $[\text{M}+\text{Na}]^+$ : 338.17411; Found: 338.17440.

**5-Ethoxy-1'-ethyl-5'-methoxy-5H-spiro[furan-2,3'-indolin]-2'-one (13n)**

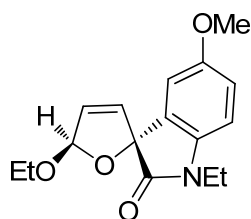

**13n**

Yellow oil, (49 mg, 56%), IR (KBr) 2975, 2928, 1723, 1649, 1540, 1472, 1266, 1017, 946, 863, 740  $\text{cm}^{-1}$ ;  $^1\text{H}$  NMR (400 MHz,  $\text{CDCl}_3$ )  $\delta$  6.88-6.85 (m, 1H), 6.80 – 6.66 (m, 3H), 6.28 (s, 1H), 6.22 (t,  $J = 4.6$  Hz, 1H), 5.95 (d,  $J = 5.8$  Hz, 1H), 3.89-3.86 (m, 2H), 3.79 (s, 3H), 3.78-3.71 (m, 2H), 1.32-1.27 (m, 6H);  $^{13}\text{C}$  NMR (101 MHz,  $\text{CDCl}_3$ )  $\delta$  173.0, 156.3, 136.3, 132.3, 130.1, 129.0, 115.0, 111.4, 109.7, 109.1, 89.9, 62.5, 55.9, 35.1, 15.4, 12.6; HRMS  $m/z$  (ESI) calculated for  $\text{C}_{16}\text{H}_{19}\text{NO}_4$   $[\text{M}+\text{Na}]^+$ : 312.12216; Found: 312.12238.

**5-Ethoxy-1'-ethyl-5'-fluoro-5H-spiro[furan-2,3'-indolin]-2'-one (13o)**

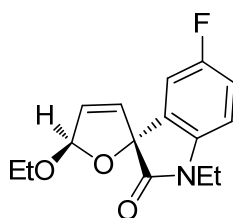

**13o**

Yellow oil, (60 mg, 72%), IR (KBr) 2979, 2936, 1734, 1614, 1498, 1375, 1202, 949, 831, 741  $\text{cm}^{-1}$ ;  $^1\text{H}$  NMR (400 MHz,  $\text{CDCl}_3$ )  $\delta$  7.06-7.00 (m, 1H), 6.90-6.88 (m, 1H), 6.80-6.78 (m, 1H), 6.27 (s, 1H), 6.25 (d,  $J = 5.9$  Hz, 1H), 5.95-5.93 (m, 1H), 3.87-3.83 (m, 2H), 3.77-3.74 (m, 2H), 1.31-1.27 (m, 6H);  $^{13}\text{C}$  NMR (101 MHz,  $\text{CDCl}_3$ )  $\delta$  173.5, 165.4, 144.7, 131.92, 130.45, 125.8, 123.1, 109.3, 108.8, 97.4, 89.04, 62.72, 35.21, 15.37, 12.46; HRMS  $m/z$  (ESI) calculated for  $\text{C}_{15}\text{H}_{16}\text{FNO}_3$   $[\text{M}+\text{Na}]^+$ : 300.10196; Found: 300.10202.

**5-Ethoxy-1'-ethyl-5'-fluoro-5H-spiro[furan-2,3'-indolin]-2'-one (13p)**

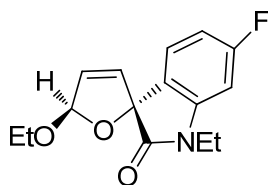

**13p**

Yellow oil, (62 mg, 74%), IR (KBr) 3086, 2979, 2936, 1734, 1614, 1498, 1375, 1202, 949, 831, 741  $\text{cm}^{-1}$ ;  $^1\text{H}$  NMR (400 MHz,  $\text{CDCl}_3$ )  $\delta$  7.01 (t,  $J = 8.8$  Hz, 1H), 6.87 (d,  $J = 7.3$  Hz, 1H), 6.78-6.75 (m, 1H), 6.26 – 6.22 (m, 2H), 5.92 (d,  $J = 5.8$  Hz, 1H), 3.85-3.83 (m, 2H), 3.74 (q,  $J = 7.2$  Hz, 2H), 1.27 (t,  $J = 6.9$  Hz, 6H);  $^{13}\text{C}$  NMR (101 MHz,  $\text{CDCl}_3$ )  $\delta$  173.0, 159.3, 138.8, 131.8, 130.6, 129.4, 116.4, 112.5, 109.8, 109.2, 89.5, 62.7, 35.1, 15.4, 12.5; HRMS  $m/z$  (ESI) calculated for  $\text{C}_{15}\text{H}_{16}\text{FNO}_3$   $[\text{M}+\text{Na}]^+$ : 300.10205; Found: 300.10196.

***1'-Ethyl-5-propoxy-5H-spiro[furan-2,3'-indolin]-2'-one (13q)***

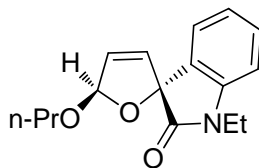

**13q**

Yellow oil, (37 mg, 45%), IR (KBr) 3082, 2976, 2884, 1727, 1613, 1466, 1356, 1279, 1146, 940, 850, 745  $\text{cm}^{-1}$ ;  $^1\text{H}$  NMR (400 MHz,  $\text{CDCl}_3$ )  $\delta$  7.31 (t,  $J = 7.6$  Hz, 1H), 7.12 (d,  $J = 7.3$  Hz, 1H), 7.04 (t,  $J = 7.4$  Hz, 1H), 6.84 (d,  $J = 7.8$  Hz, 1H), 6.25 (s, 1H), 6.21 (d,  $J = 5.8$  Hz, 1H), 5.93 (d,  $J = 5.8$  Hz, 1H), 3.77-3.72 (m, 4H), 1.72-1.63 (m, 2H), 1.28 (t,  $J = 7.2$  Hz, 3H), 0.96 (t,  $J = 7.4$  Hz, 3H);  $^{13}\text{C}$  NMR (101 MHz,  $\text{CDCl}_3$ )  $\delta$  173.2, 143.0, 132.2, 130.2, 130.2, 127.8, 124.5, 122.8, 109.9, 108.6, 89.6, 68.9, 35.0, 23.1, 12.6, 10.6; HRMS  $m/z$  (ESI) Calculated for  $\text{C}_{16}\text{H}_{19}\text{NO}_3$   $[\text{M}+\text{Na}]^+$ : 296.12714; Found: 296.12708.

***1'-Ethyl-5-isopropoxy-5H-spiro[furan-2,3'-indolin]-2'-one (13r)***

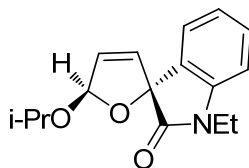

**13r**

Yellow oil, (39 mg, 47%), IR (KBr) 2972, 2921, 1730, 1649, 1525, 1486, 1364, 1209, 1107, 1022, 938, 850, 749  $\text{cm}^{-1}$ ;  $^1\text{H}$  NMR (400 MHz,  $\text{CDCl}_3$ )  $\delta$  7.31 (d,  $J = 7.4$  Hz, 1H), 7.12 (d,  $J = 7.2$  Hz, 1H), 7.03 (t,  $J = 7.5$  Hz, 1H), 6.83 (d,  $J = 7.7$  Hz, 1H), 6.29 (s, 1H), 6.18 (d,  $J = 5.8$  Hz, 1H), 5.91 (d,  $J = 5.7$  Hz, 1H), 4.21-4.15 (m, 1H), 3.77-3.73 (m, 2H), 1.28 (s, 3H), 1.26-1.20 (m, 6H);  $^{13}\text{C}$  NMR (101 MHz,  $\text{CDCl}_3$ )  $\delta$  173.2, 143.1, 131.9, 130.5, 130.2, 127.8, 124.4, 122.7, 108.5, 108.5, 89.6, 69.9, 35.0, 23.7, 22.5, 12.6; HRMS  $m/z$  (ESI) calculated for  $\text{C}_{16}\text{H}_{19}\text{NO}_3$   $[\text{M}+\text{Na}]^+$ : 296.12686; Found: 296.12686.

X-Ray crystal structure of **2r** (CCDC 1476097):

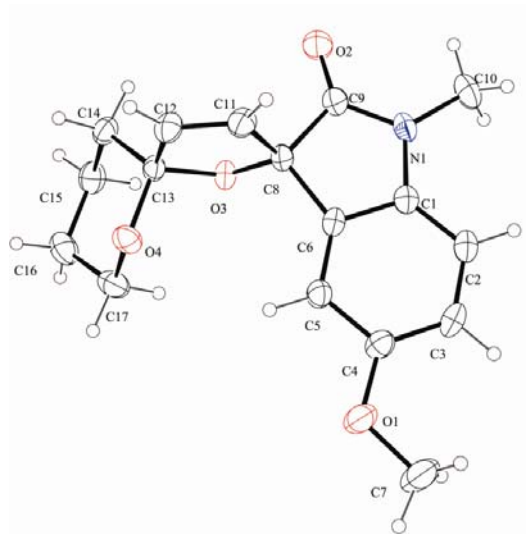

**Table S1. Crystal data and structure refinement for sad1.**

|                                   |                                                                                                                       |
|-----------------------------------|-----------------------------------------------------------------------------------------------------------------------|
| Identification code               | sad1                                                                                                                  |
| Empirical formula                 | C <sub>17</sub> H <sub>19</sub> NO <sub>4</sub>                                                                       |
| Formula weight                    | 301.33                                                                                                                |
| Temperature                       | 571(2) K                                                                                                              |
| Wavelength                        | 0.71073 Å                                                                                                             |
| Crystal system, space group       | Monoclinic, P2(1)/n                                                                                                   |
| Unit cell dimensions              | a = 14.349(3) Å    alpha = 90 deg.<br>b = 7.2477(14) Å    beta = 105.12(3) deg.<br>c = 14.692(3) Å    gamma = 90 deg. |
| Volume                            | 1475.1(5) Å <sup>3</sup>                                                                                              |
| Z, Calculated density             | 4, 1.357 Mg/m <sup>3</sup>                                                                                            |
| Absorption coefficient            | 0.097 mm <sup>-1</sup>                                                                                                |
| F(000)                            | 640                                                                                                                   |
| Crystal size                      | 0.26 x 0.20 x 0.18 mm                                                                                                 |
| Theta range for data collection   | 3.16 to 27.47 deg.                                                                                                    |
| Limiting indices                  | -18<=h<=18, -9<=k<=9, -19<=l<=19                                                                                      |
| Reflections collected / unique    | 13577 / 3358 [R(int) = 0.1194]                                                                                        |
| Completeness to theta = 27.47     | 99.4 %                                                                                                                |
| Max. and min. transmission        | 0.9828 and 0.9753                                                                                                     |
| Refinement method                 | Full-matrix least-squares on F <sup>2</sup>                                                                           |
| Data / restraints / parameters    | 3358 / 0 / 199                                                                                                        |
| Goodness-of-fit on F <sup>2</sup> | 0.845                                                                                                                 |
| Final R indices [I>2sigma(I)]     | R <sub>1</sub> = 0.0476, wR <sub>2</sub> = 0.0894                                                                     |
| R indices (all data)              | R <sub>1</sub> = 0.1560, wR <sub>2</sub> = 0.1202                                                                     |
| Largest diff. peak and hole       | 0.203 and -0.237 e.Å <sup>-3</sup>                                                                                    |

X-Ray crystal structure of **13h** (CCDC 1476096):

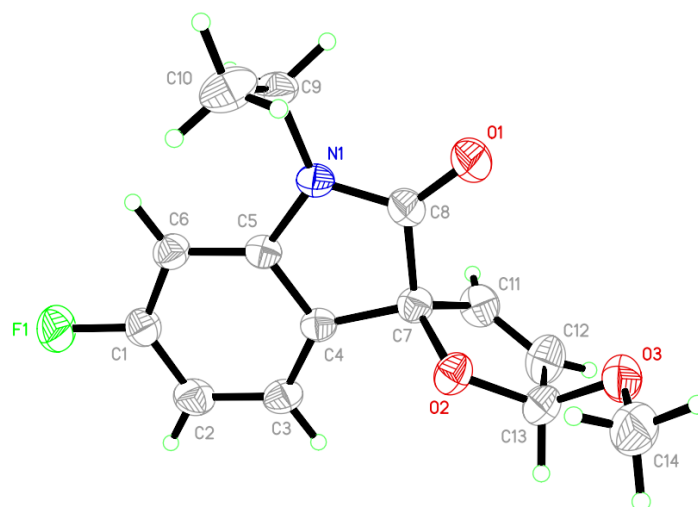

**Table S2. Crystal data and structure refinement for sad.**

|                                   |                                                                                                                |
|-----------------------------------|----------------------------------------------------------------------------------------------------------------|
| Identification code               | sad                                                                                                            |
| Empirical formula                 | C <sub>14</sub> H <sub>14</sub> FNO <sub>3</sub>                                                               |
| Formula weight                    | 263.26                                                                                                         |
| Temperature                       | 293(2) K                                                                                                       |
| Wavelength                        | 0.71073 Å                                                                                                      |
| Crystal system, space group       | Orthorhombic, P2(1)2(1)2(1)                                                                                    |
| Unit cell dimensions              | a = 8.2754(17) Å    alpha = 90 deg.<br>b = 12.082(2) Å    beta = 90 deg.<br>c = 13.332(3) Å    gamma = 90 deg. |
| Volume                            | 1333.0(5) Å <sup>3</sup>                                                                                       |
| Z, Calculated density             | 4, 1.312 Mg/m <sup>3</sup>                                                                                     |
| Absorption coefficient            | 0.102 mm <sup>-1</sup>                                                                                         |
| F(000)                            | 552                                                                                                            |
| Crystal size                      | 0.25 x 0.20 x 0.20 mm                                                                                          |
| Theta range for data collection   | 3.06 to 27.45 deg.                                                                                             |
| Limiting indices                  | -10<math>\leq h \leq 10</math>, -15<math>\leq k \leq 15</math>, -15<math>\leq l \leq 17</math>                 |
| Reflections collected / unique    | 12993 / 3044 [R(int) = 0.0433]                                                                                 |
| Completeness to theta = 27.45     | 99.5 %                                                                                                         |
| Max. and min. transmission        | 0.9800 and 0.9751                                                                                              |
| Refinement method                 | Full-matrix least-squares on F <sup>2</sup>                                                                    |
| Data / restraints / parameters    | 3044 / 0 / 173                                                                                                 |
| Goodness-of-fit on F <sup>2</sup> | 1.008                                                                                                          |
| Final R indices [I > 2sigma(I)]   | R <sub>1</sub> = 0.0330, wR <sub>2</sub> = 0.0777                                                              |
| R indices (all data)              | R <sub>1</sub> = 0.0513, wR <sub>2</sub> = 0.0902                                                              |
| Absolute structure parameter      | -0.1(9)                                                                                                        |
| Extinction coefficient            | 0.0069(19)                                                                                                     |
| Largest diff. peak and hole       | 0.139 and -0.120 e.Å <sup>-3</sup>                                                                             |

Spectra of all the new compounds

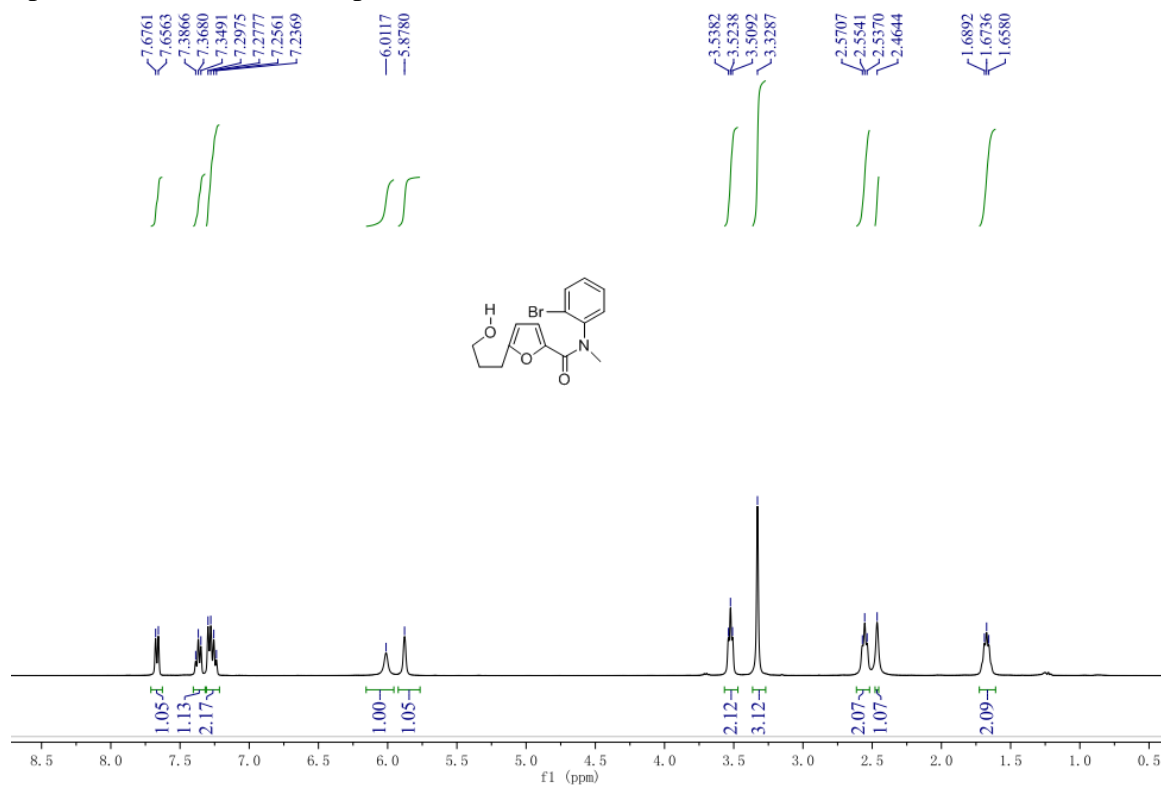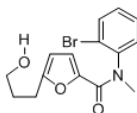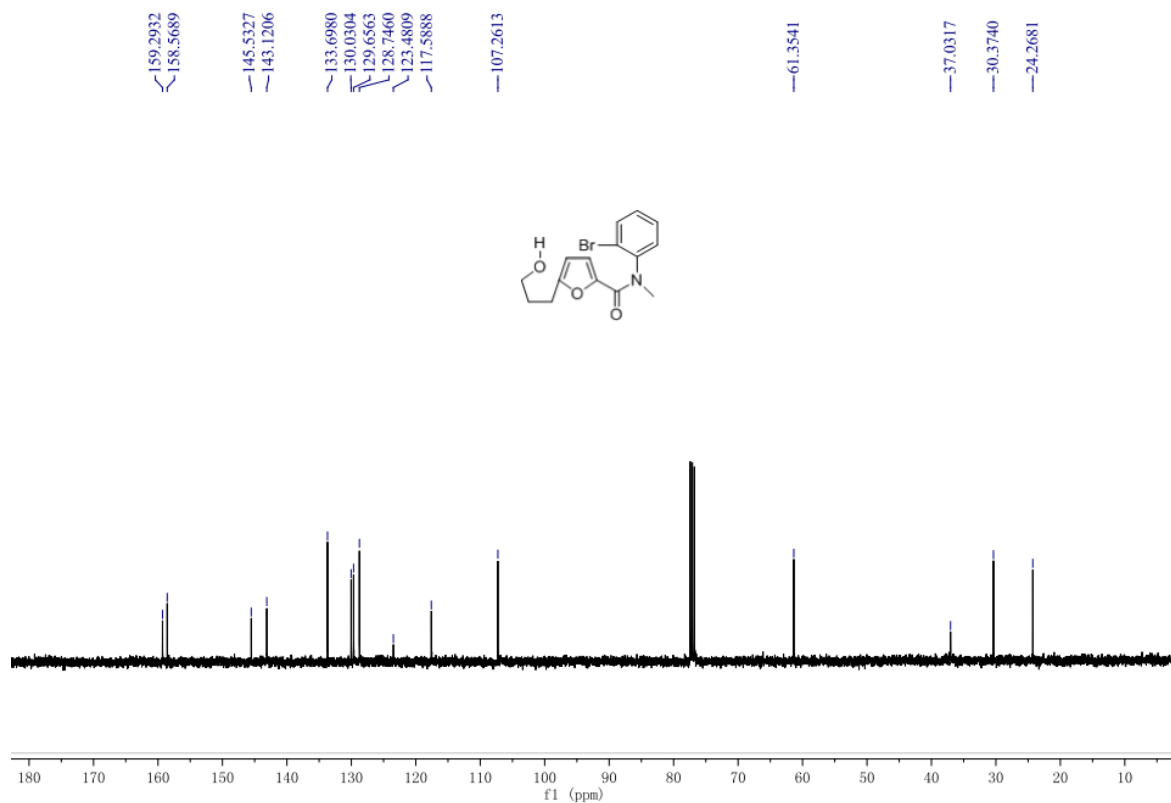



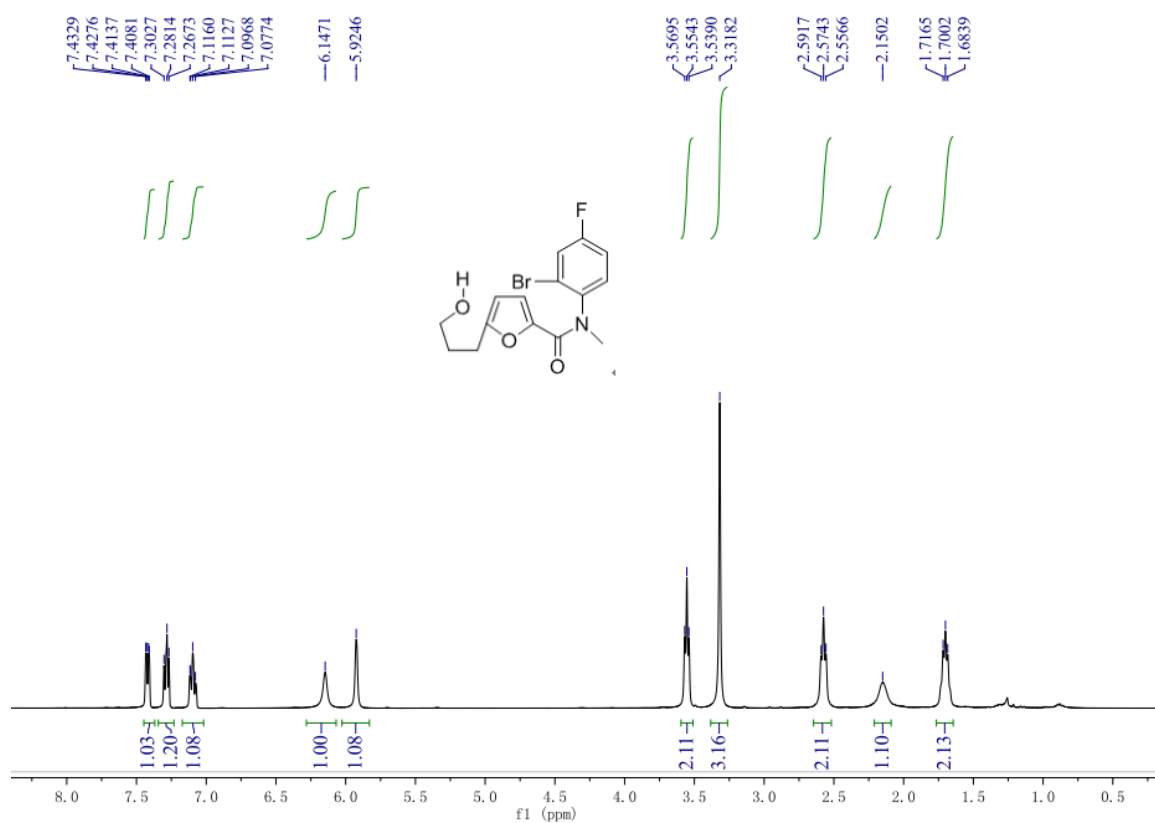

<sup>1</sup>H NMR spectrum of **1b**

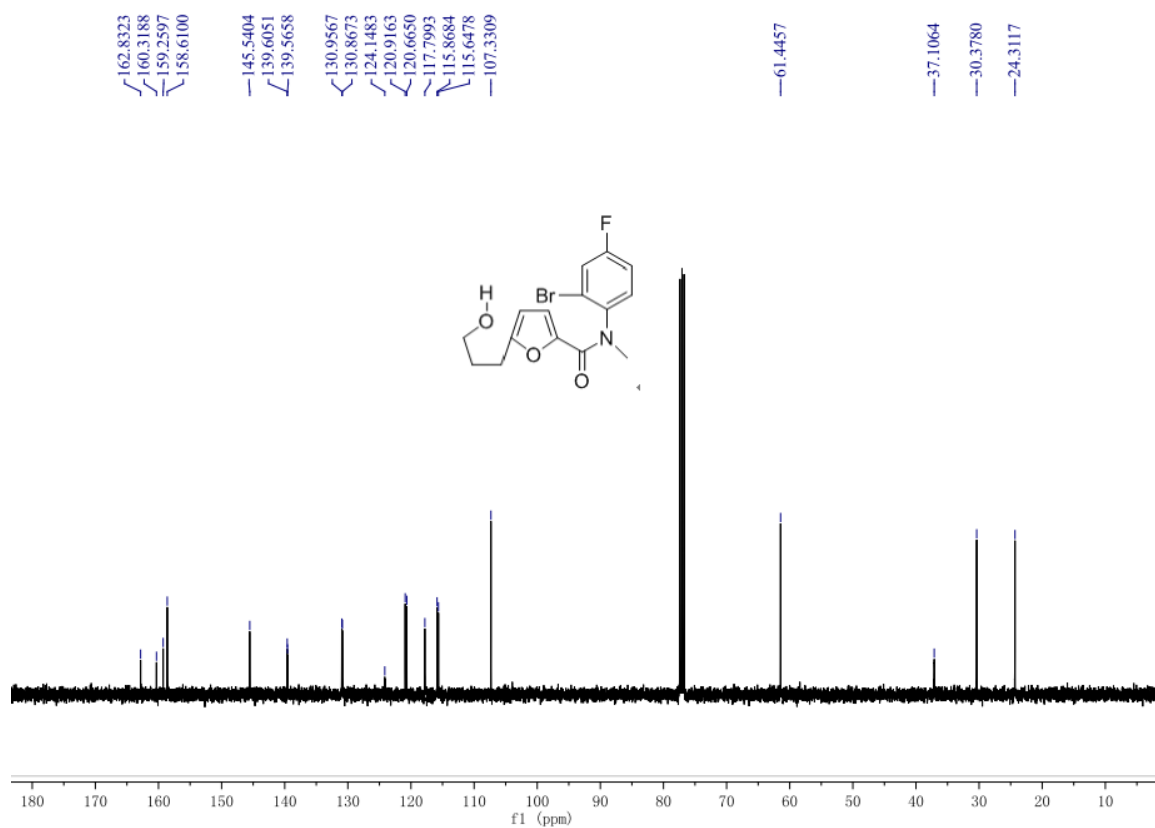

$^{13}\text{C}$  NMR spectrum of **1b**

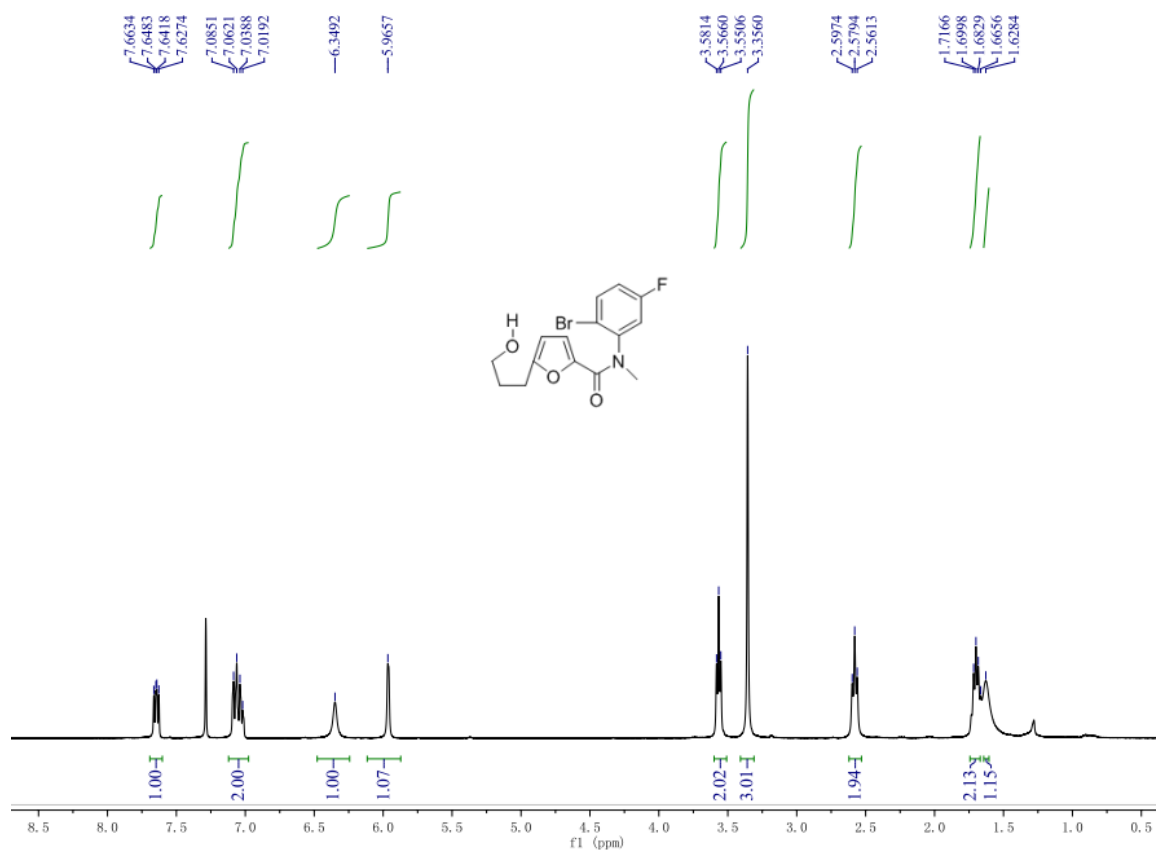

$^1\text{H}$  NMR spectrum of **1c**

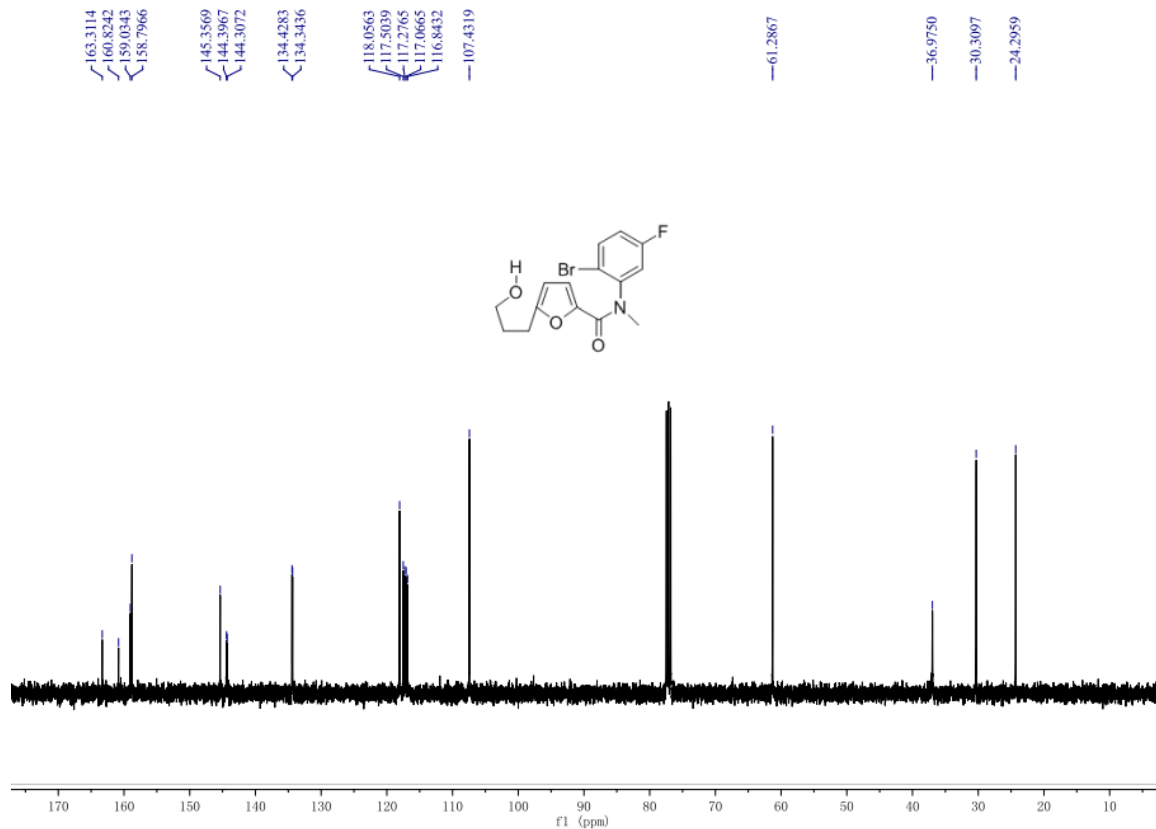

$^{13}\text{C}$  NMR spectrum of **1c**

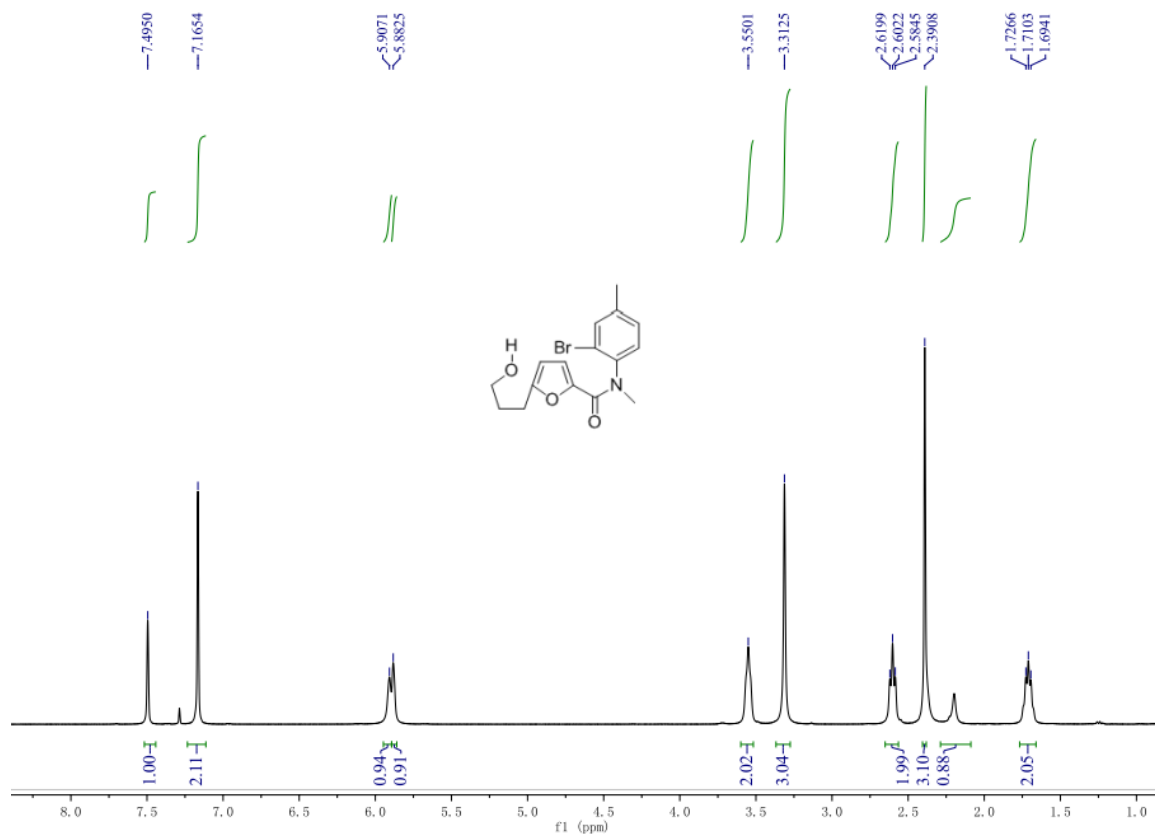

<sup>1</sup>H NMR spectrum of **1d**

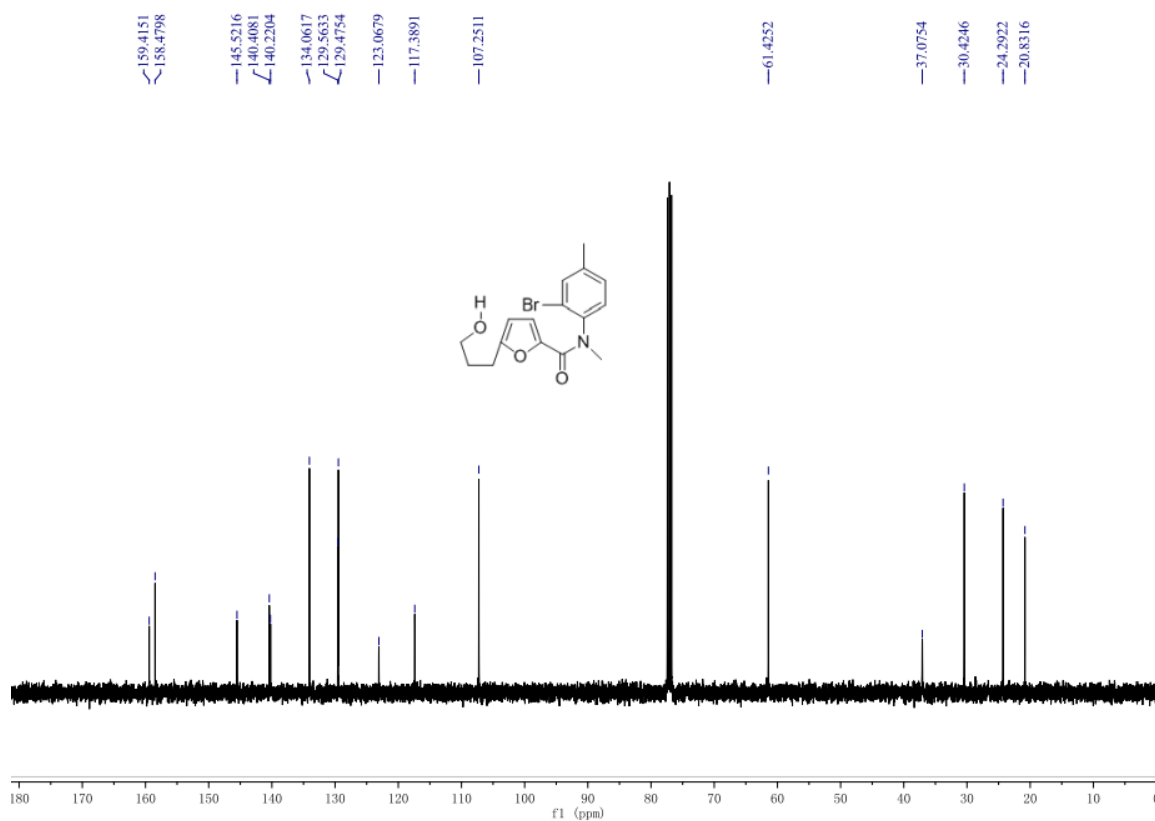

<sup>13</sup>C NMR spectrum of **1d**

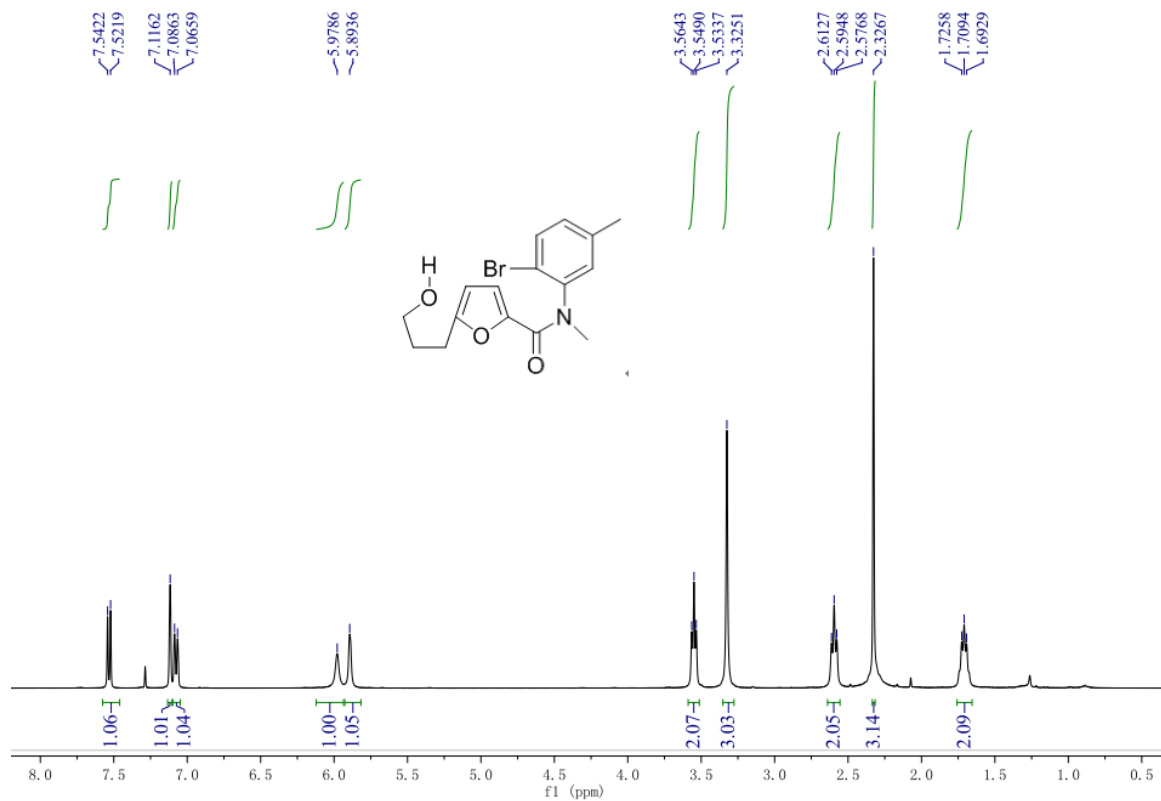

<sup>1</sup>H NMR spectrum of **1e**

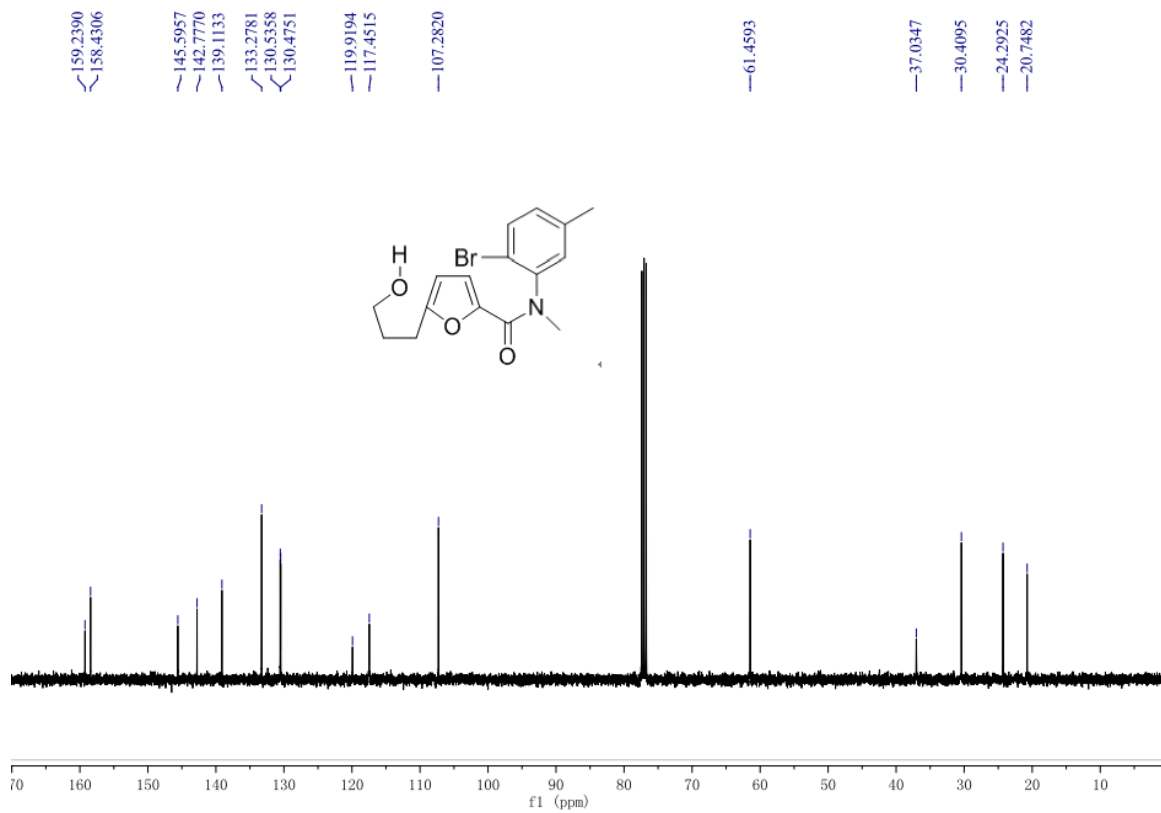

<sup>13</sup>C NMR spectrum of **1e**

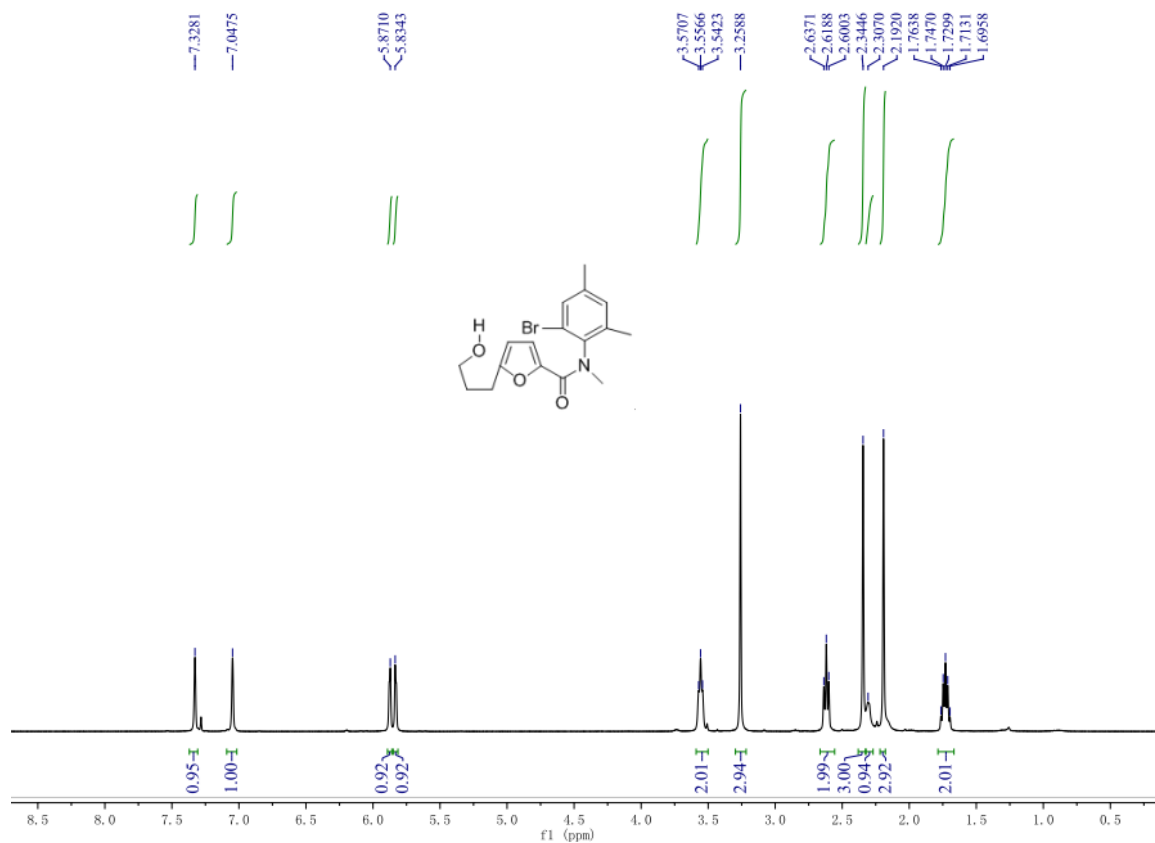

<sup>1</sup>H NMR spectrum of **1f**

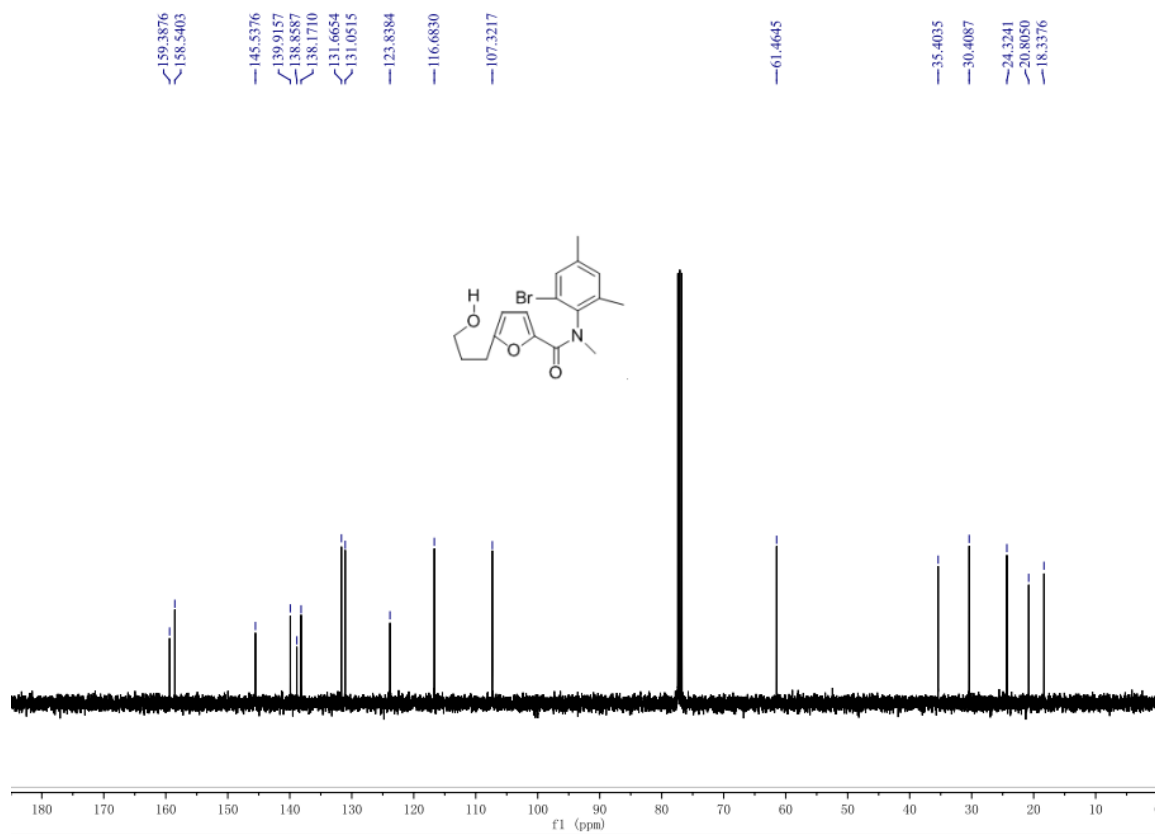

<sup>13</sup>C NMR spectrum of **1f**

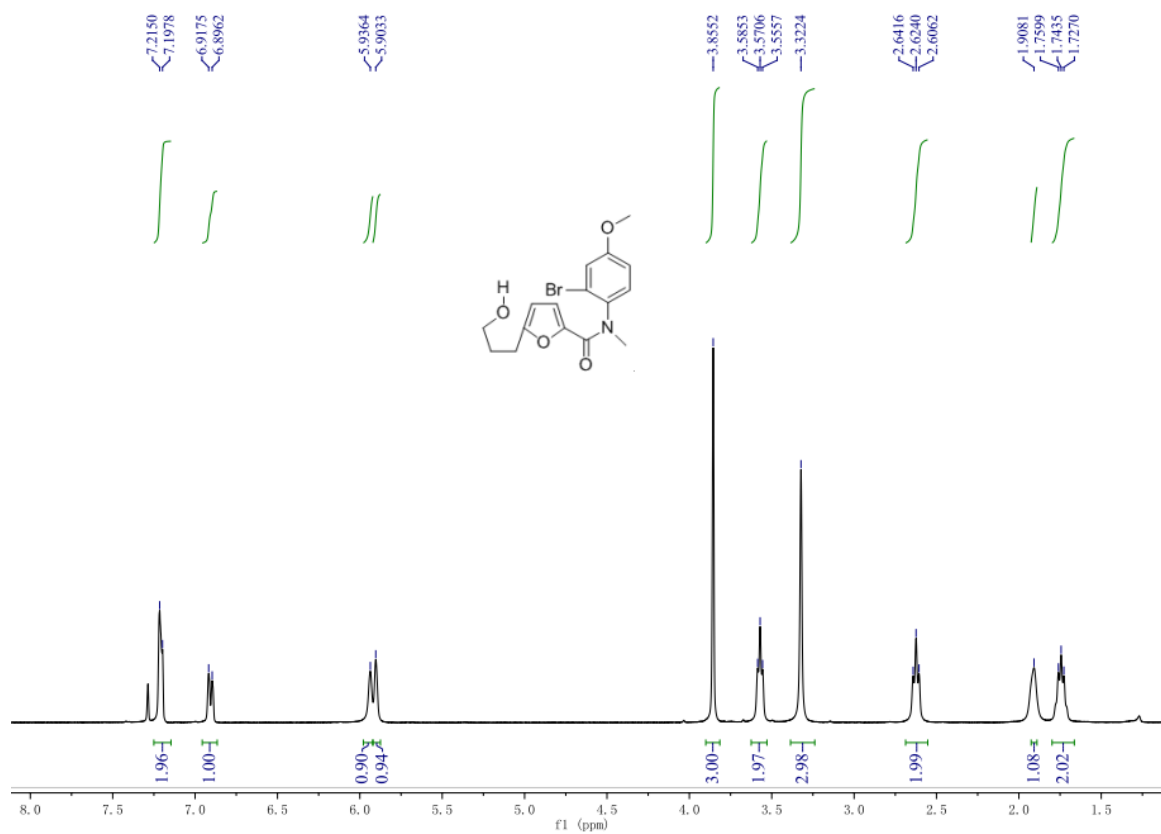

<sup>1</sup>H NMR spectrum of **1g**

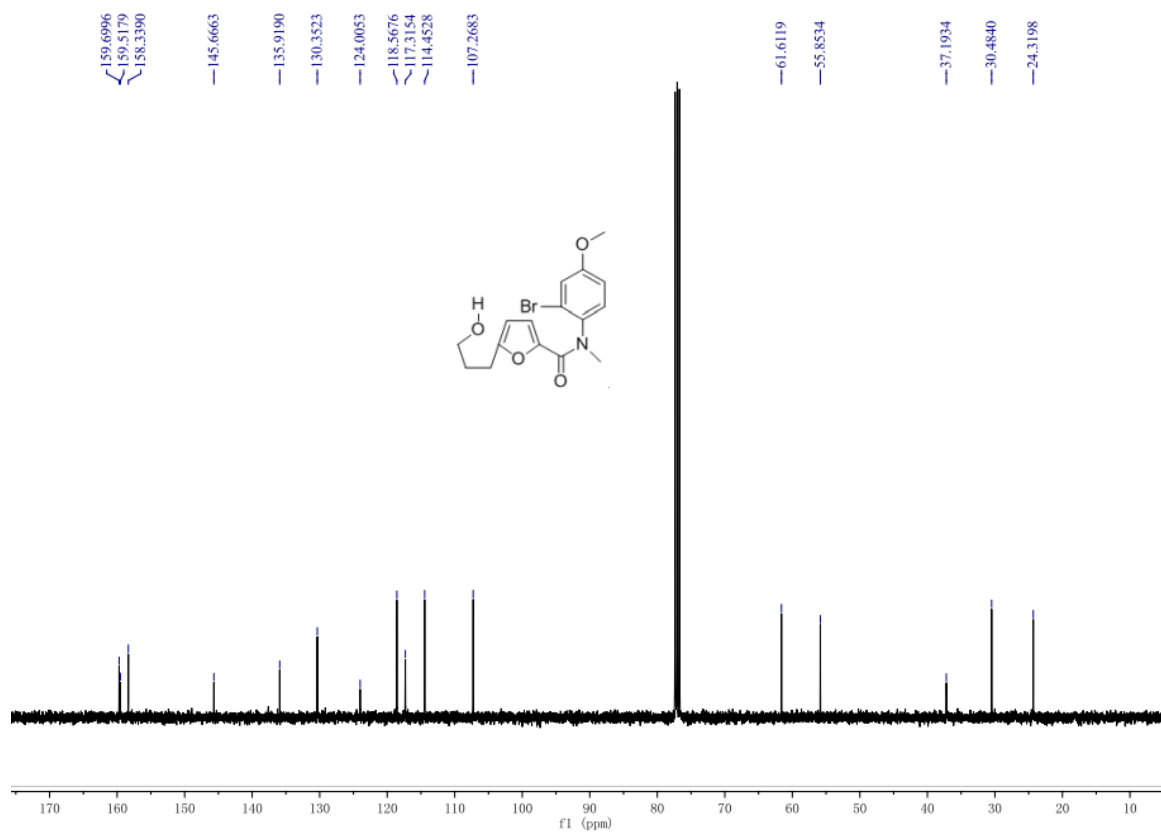

<sup>13</sup>C NMR spectrum of **1g**

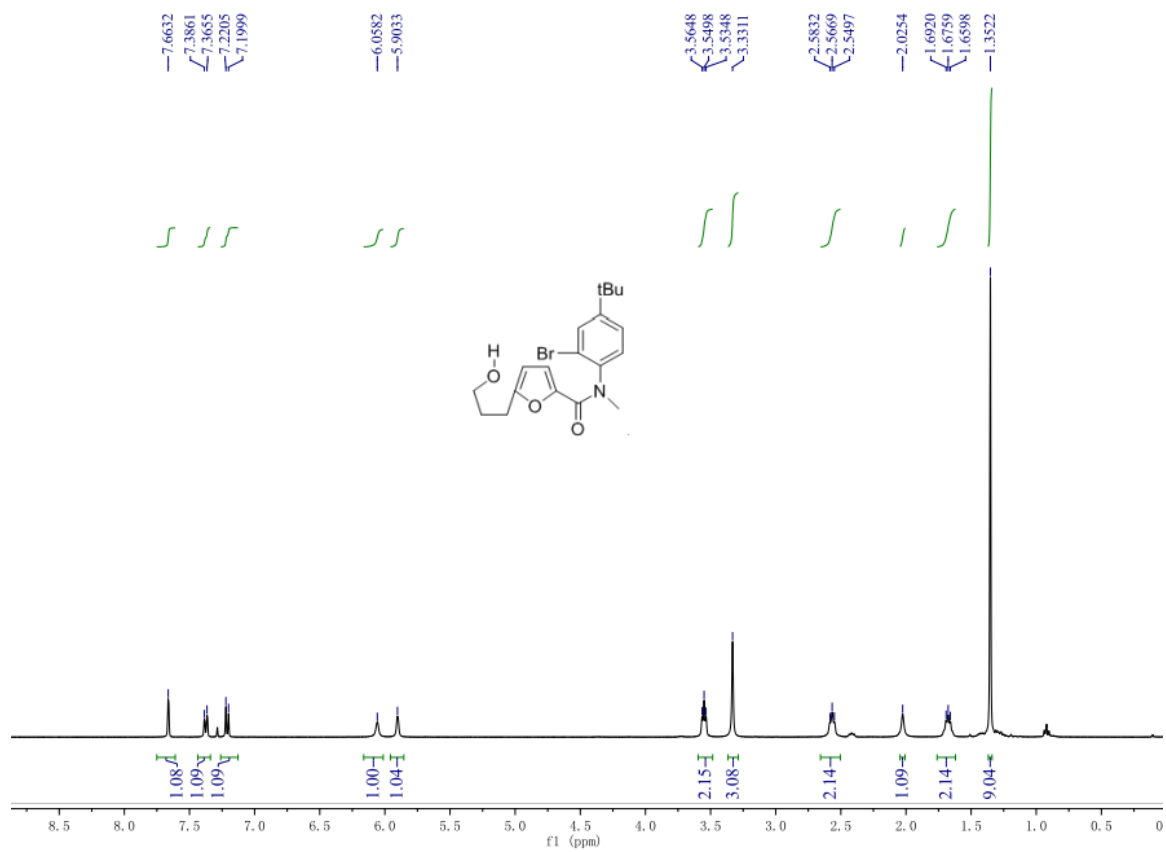

$^1\text{H}$  NMR spectrum of **1h**

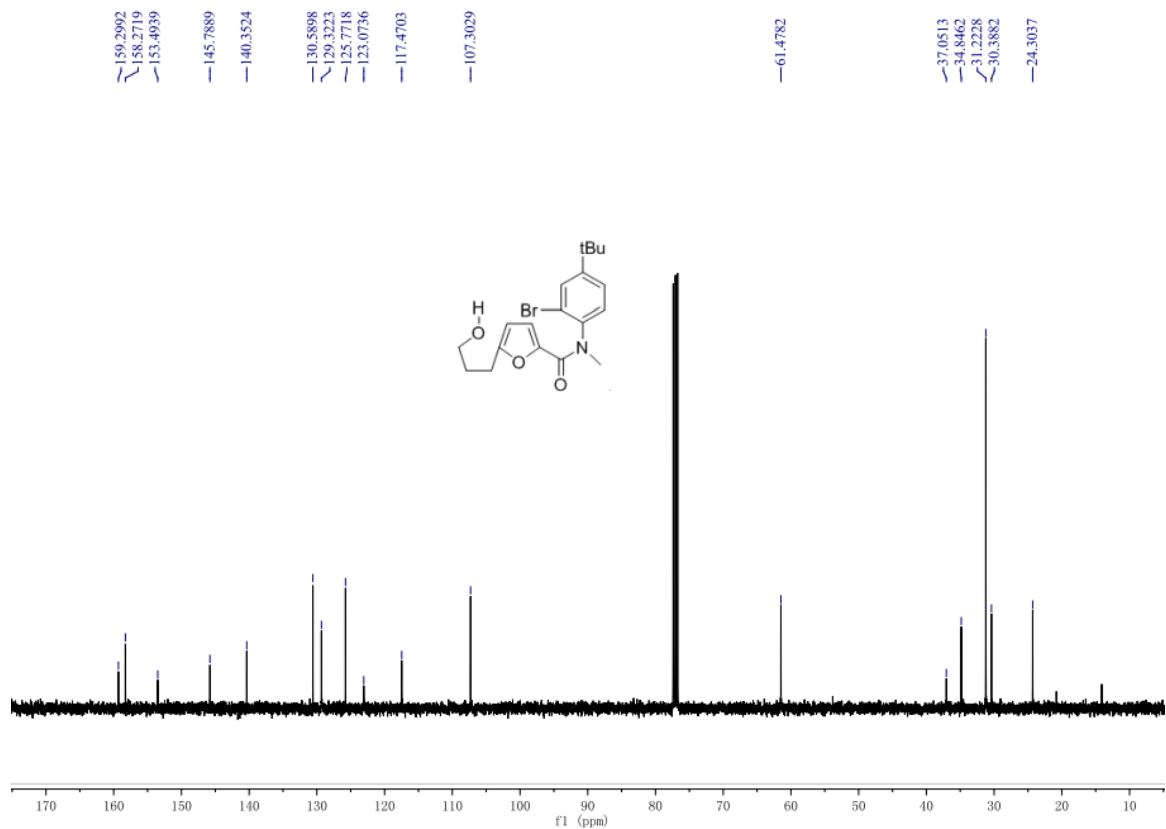

$^{13}\text{C}$  NMR spectrum of **1h**

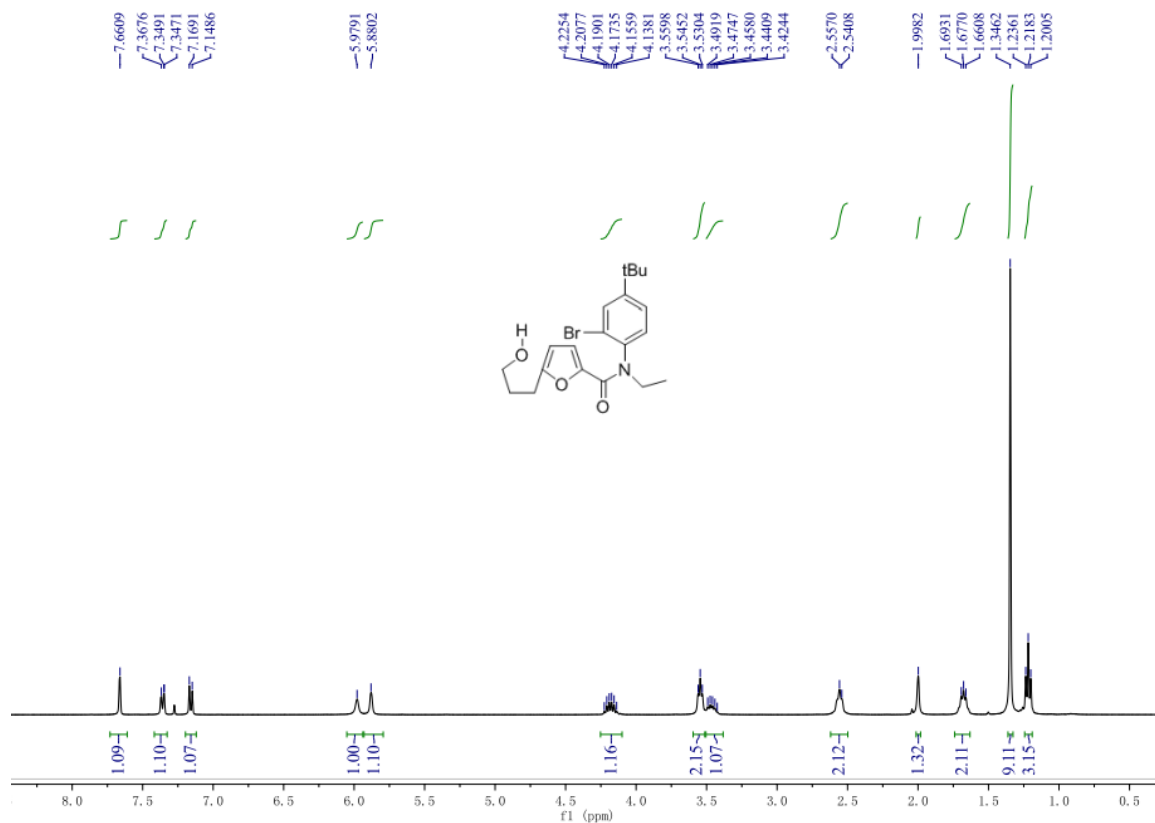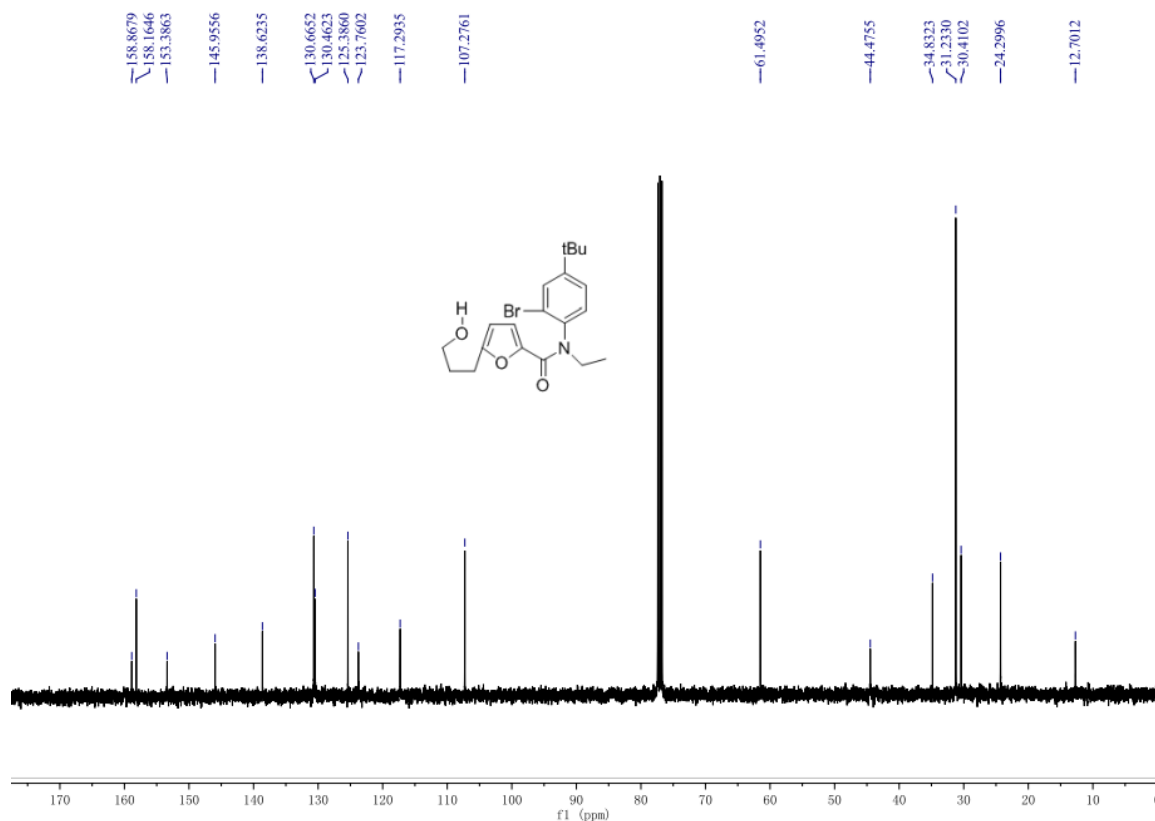



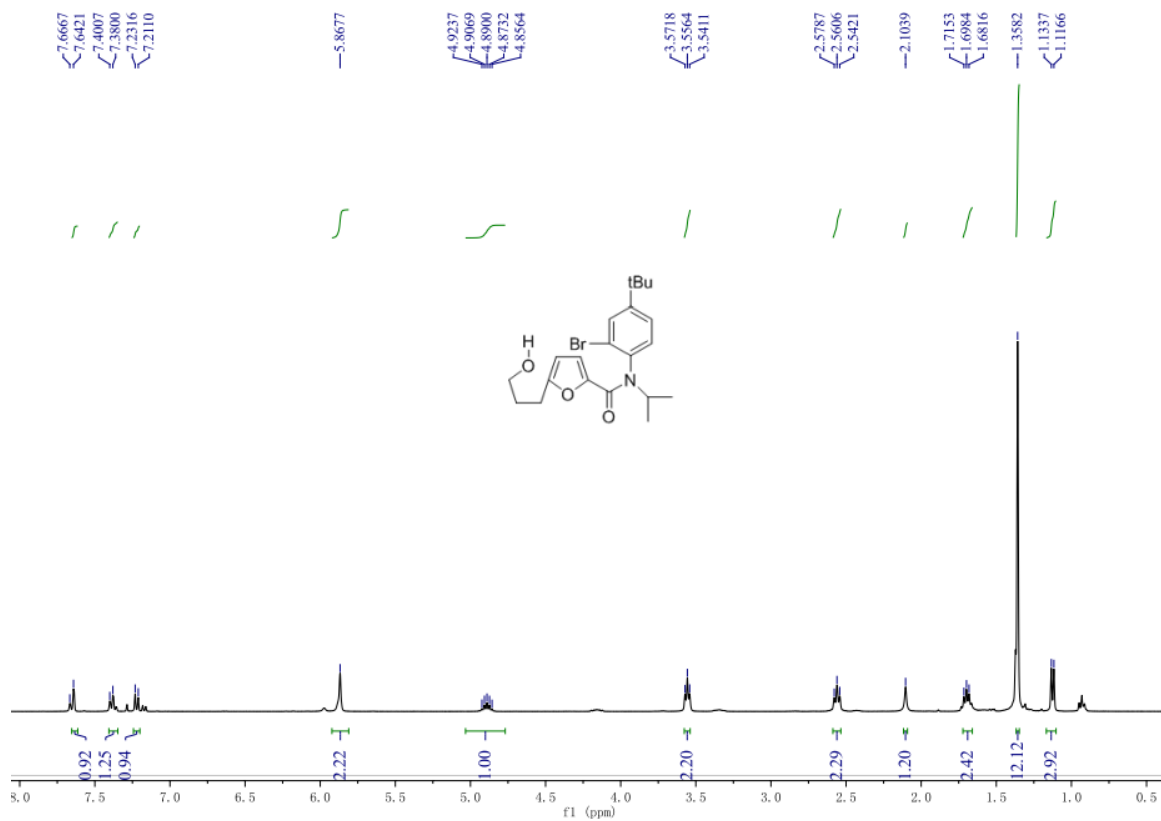

<sup>1</sup>H NMR spectrum of **1k**

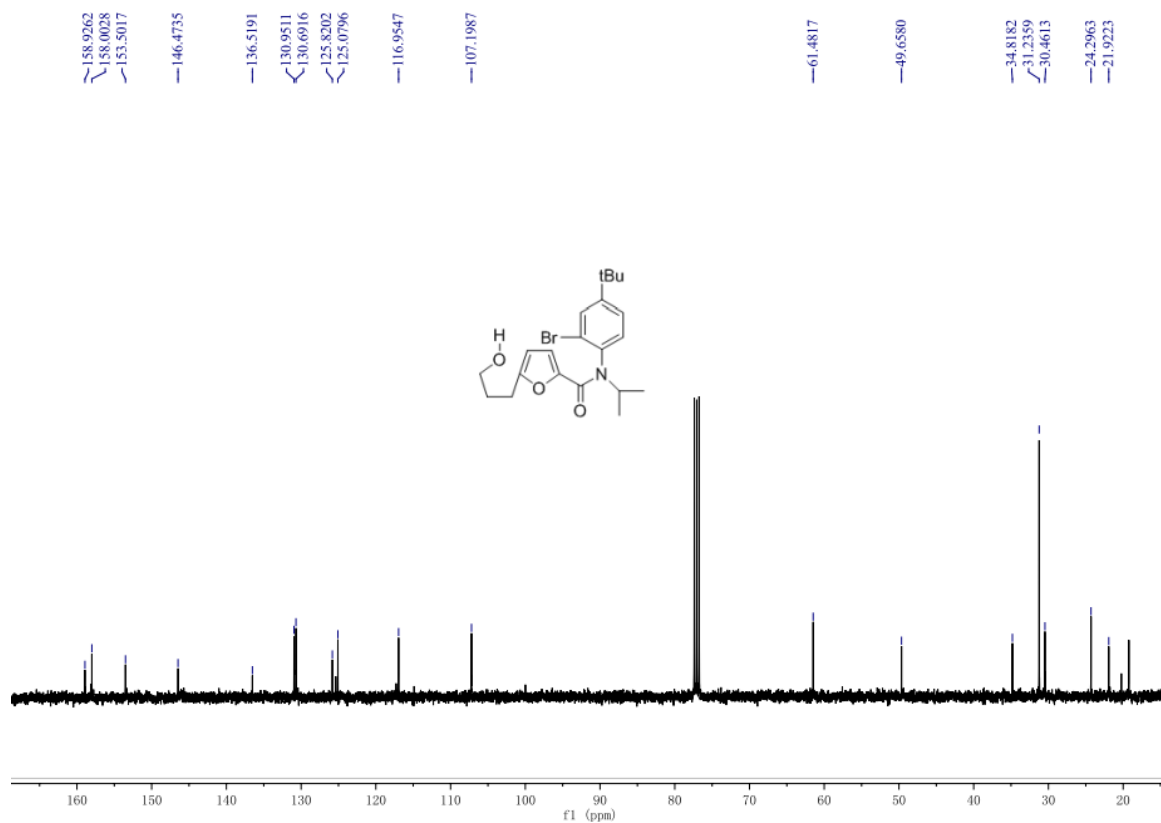

<sup>13</sup>C NMR spectrum of **1k**

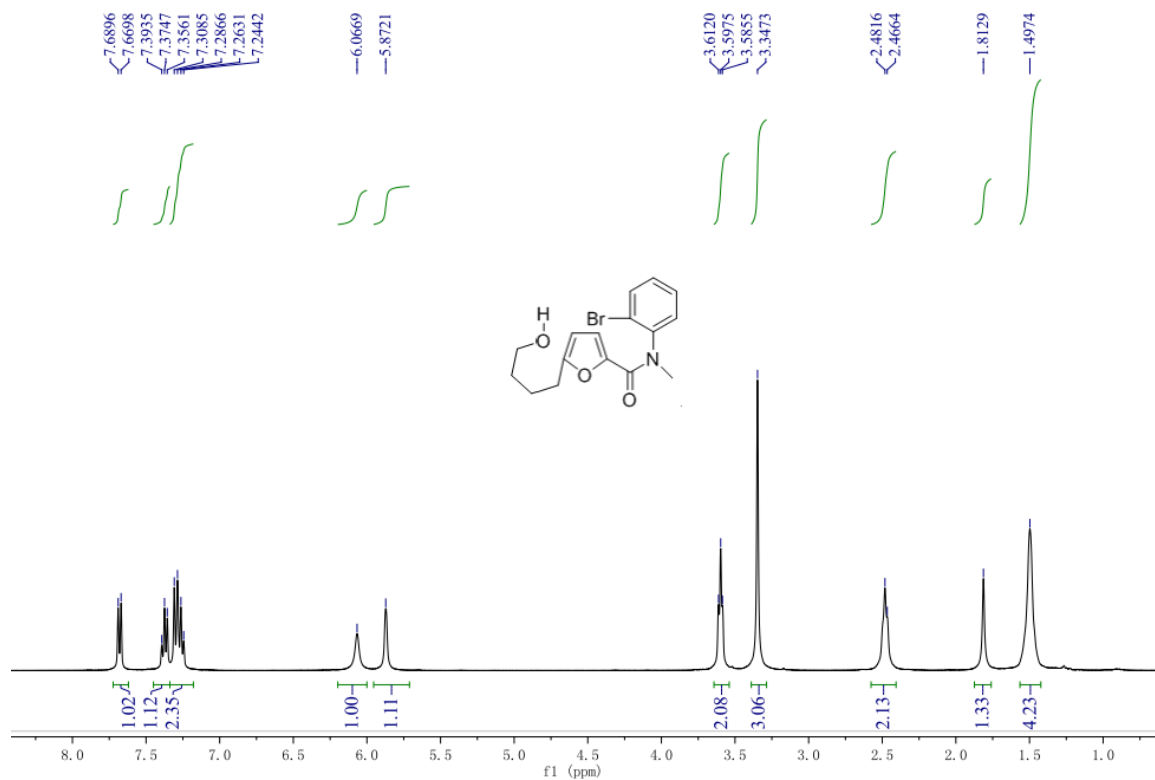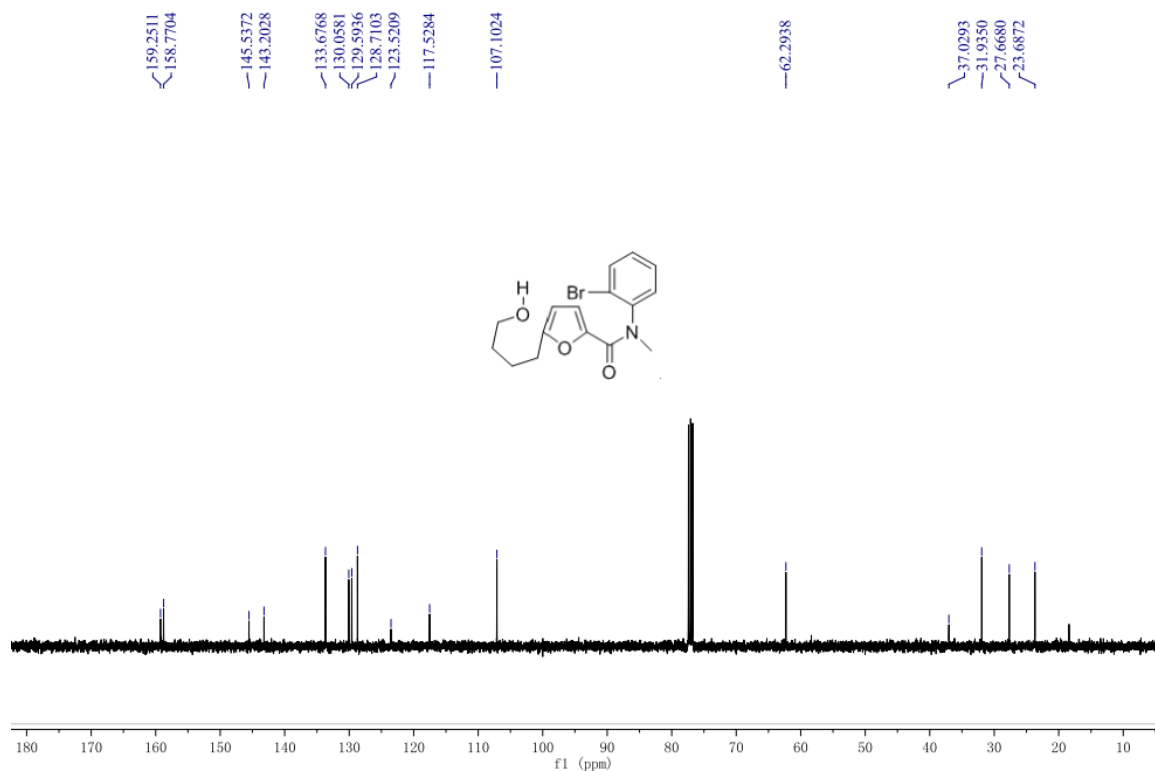

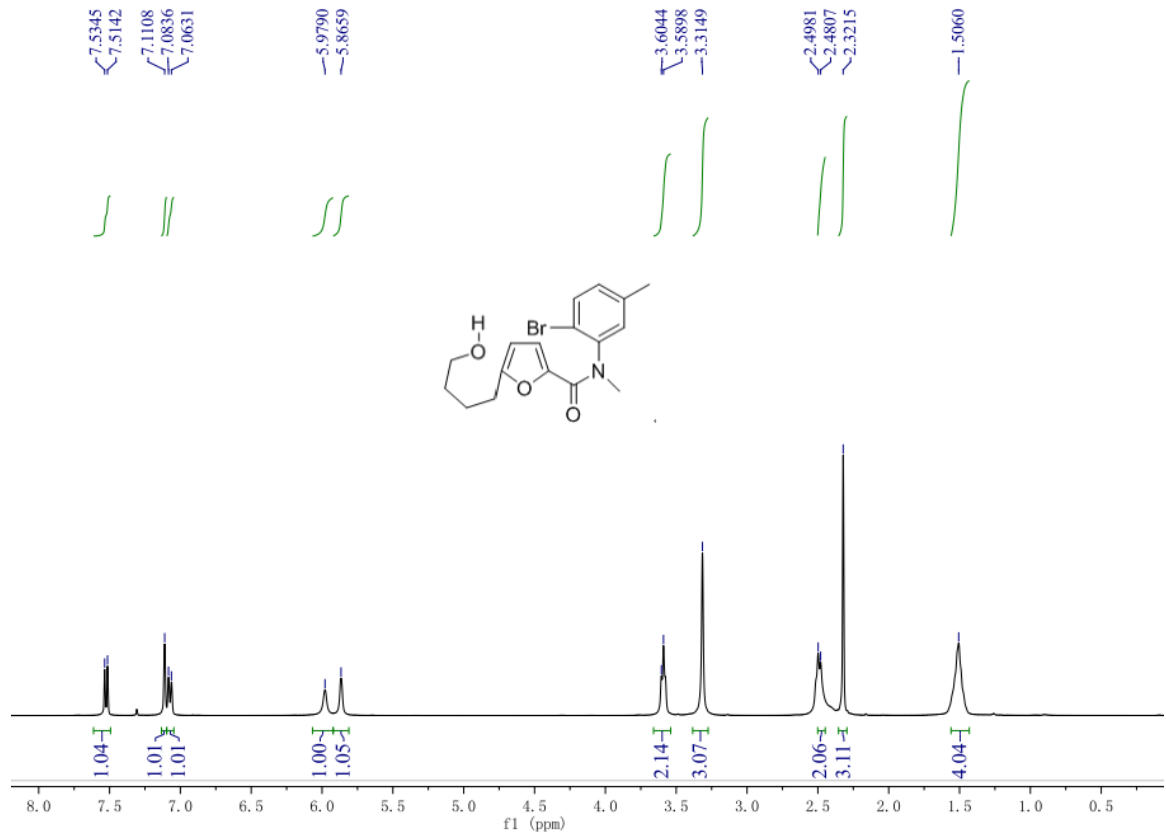

<sup>1</sup>H NMR spectrum of **1m**

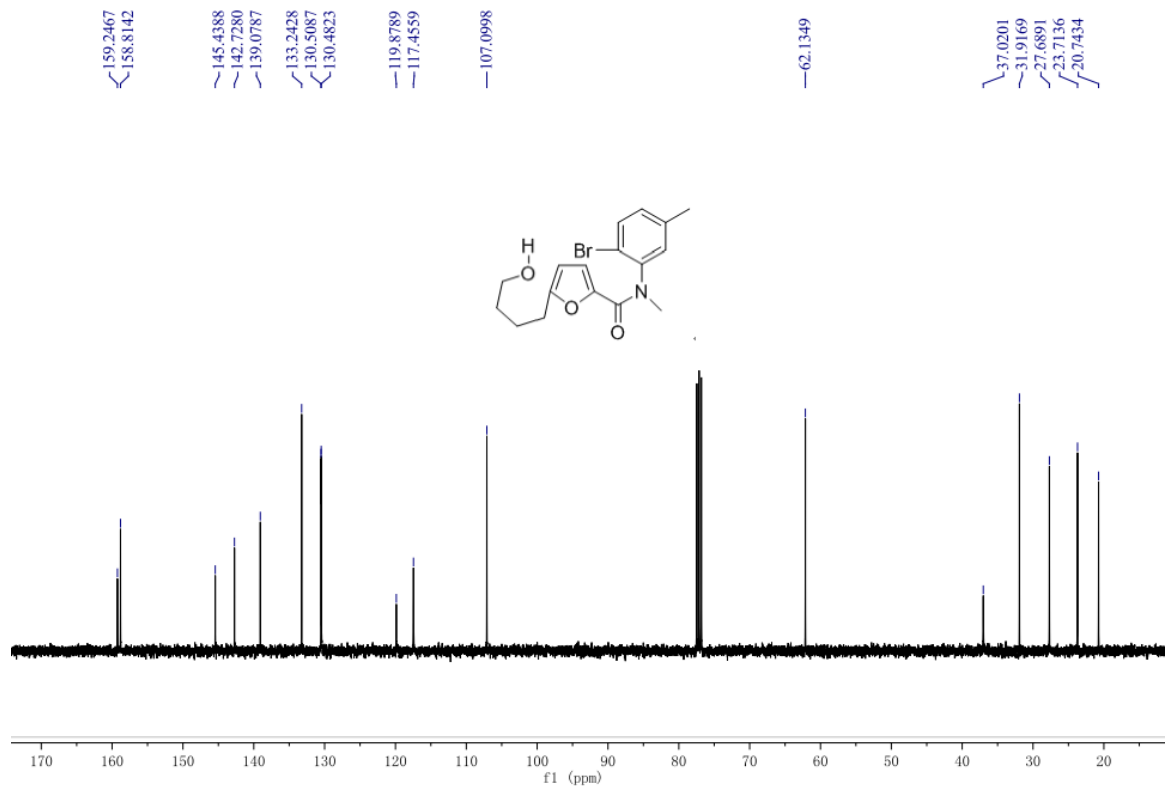

<sup>13</sup>C NMR spectrum of **1m**

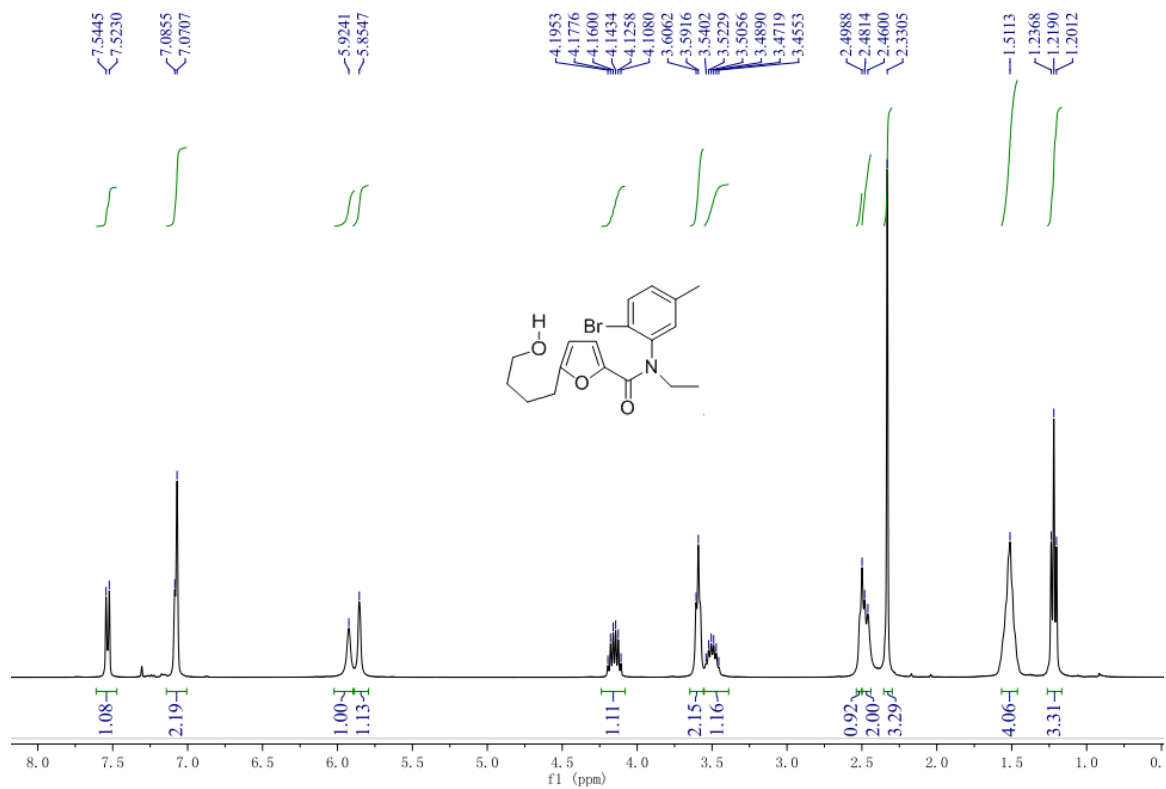

<sup>1</sup>H NMR spectrum of **1n**

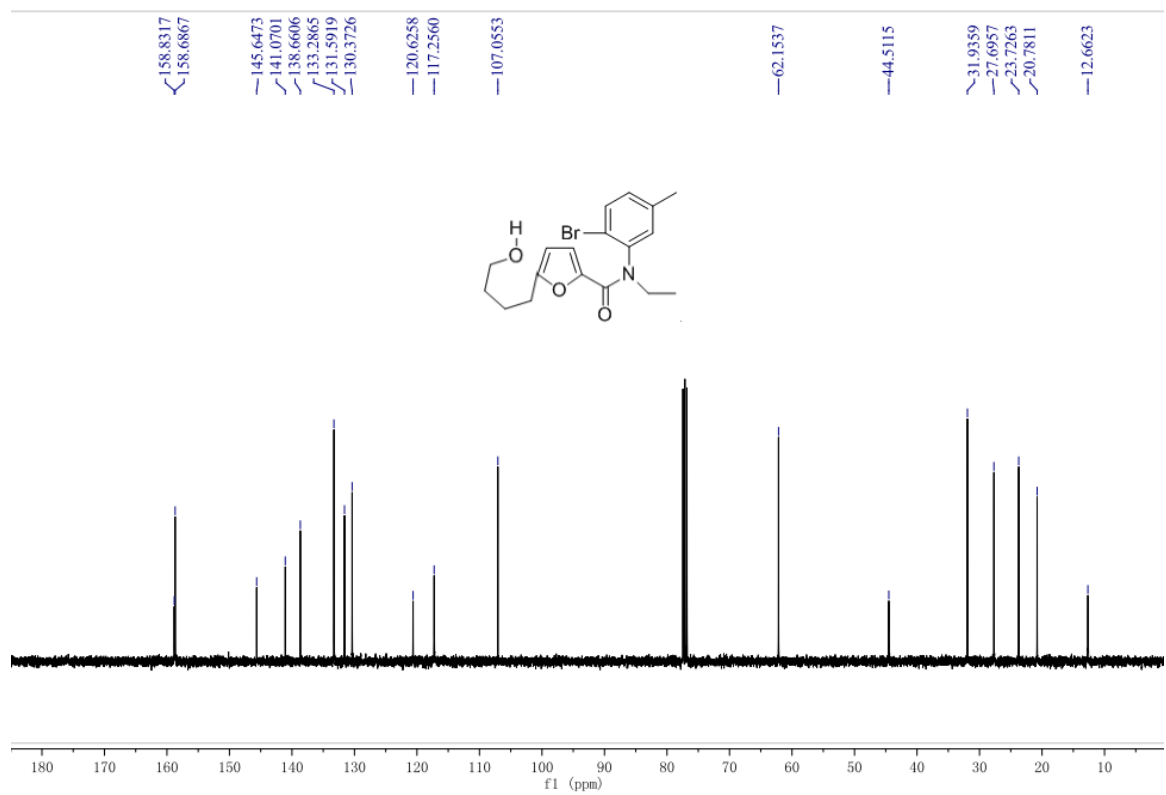

<sup>13</sup>C NMR spectrum of **1n**

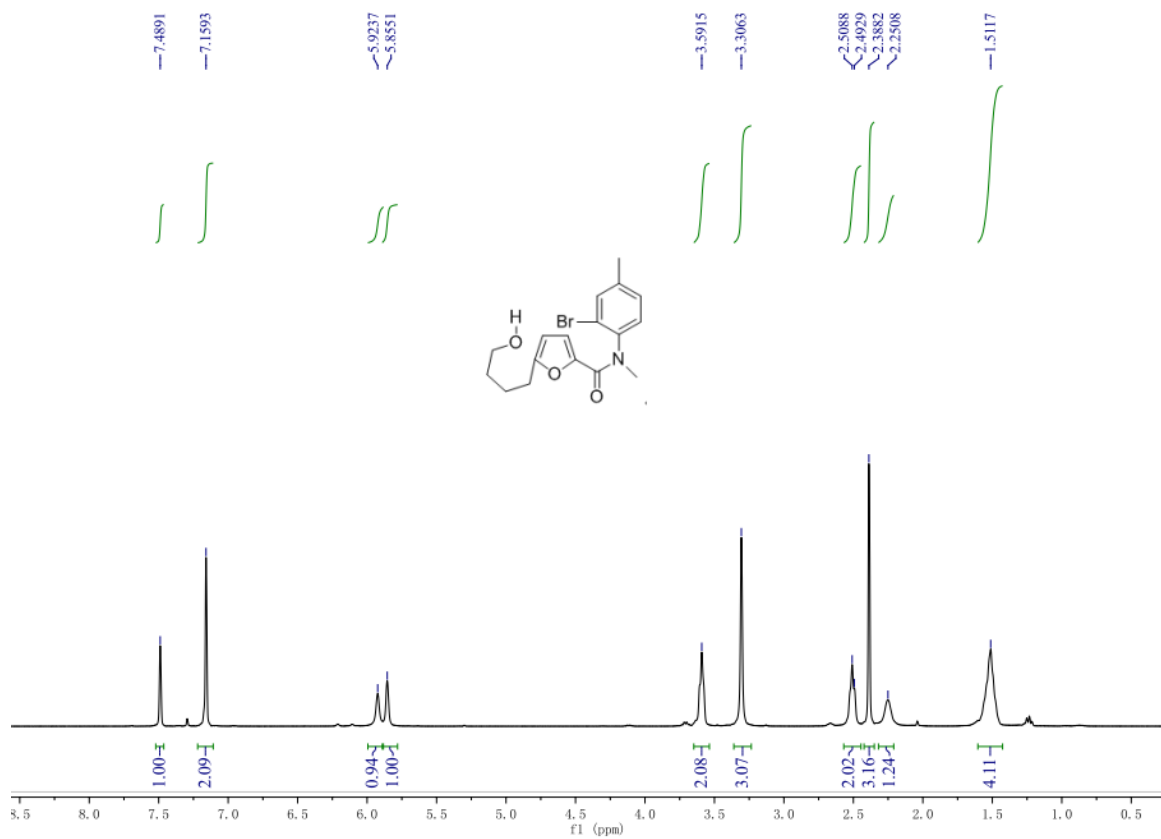

<sup>1</sup>H NMR spectrum of **10**

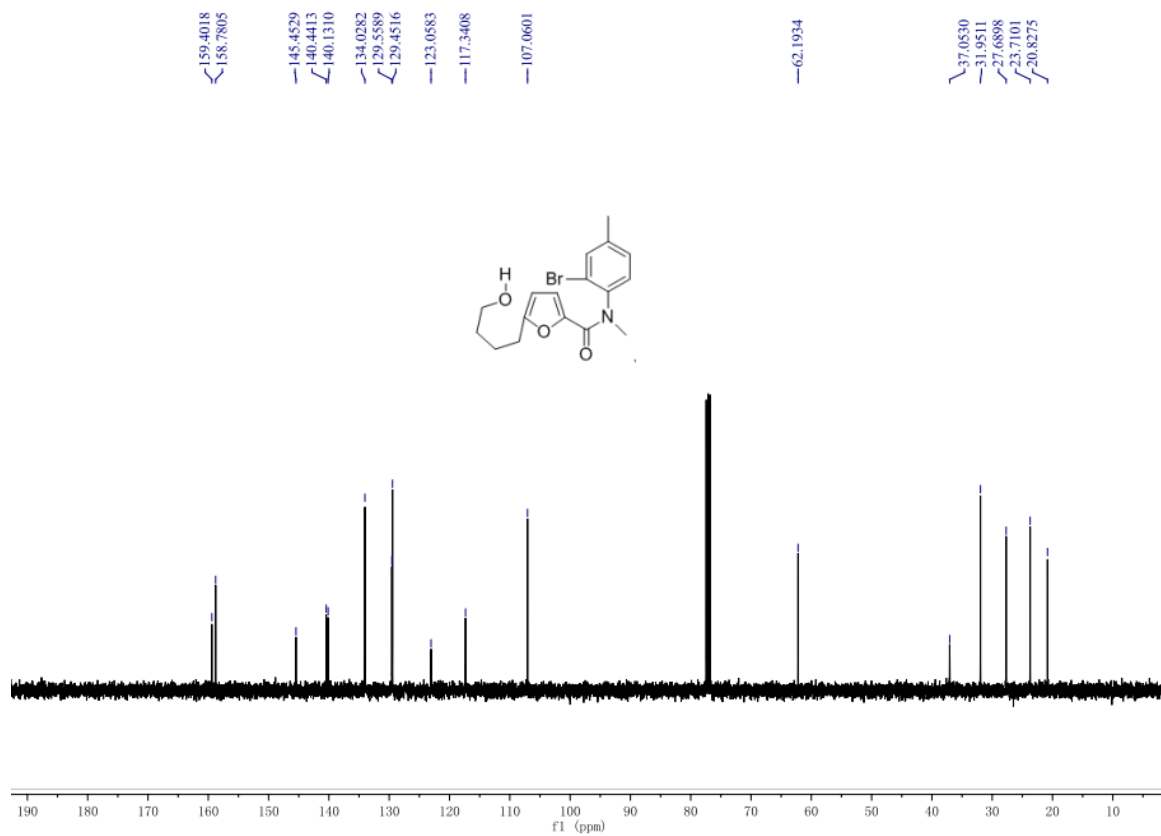

<sup>13</sup>C NMR spectrum of **10**

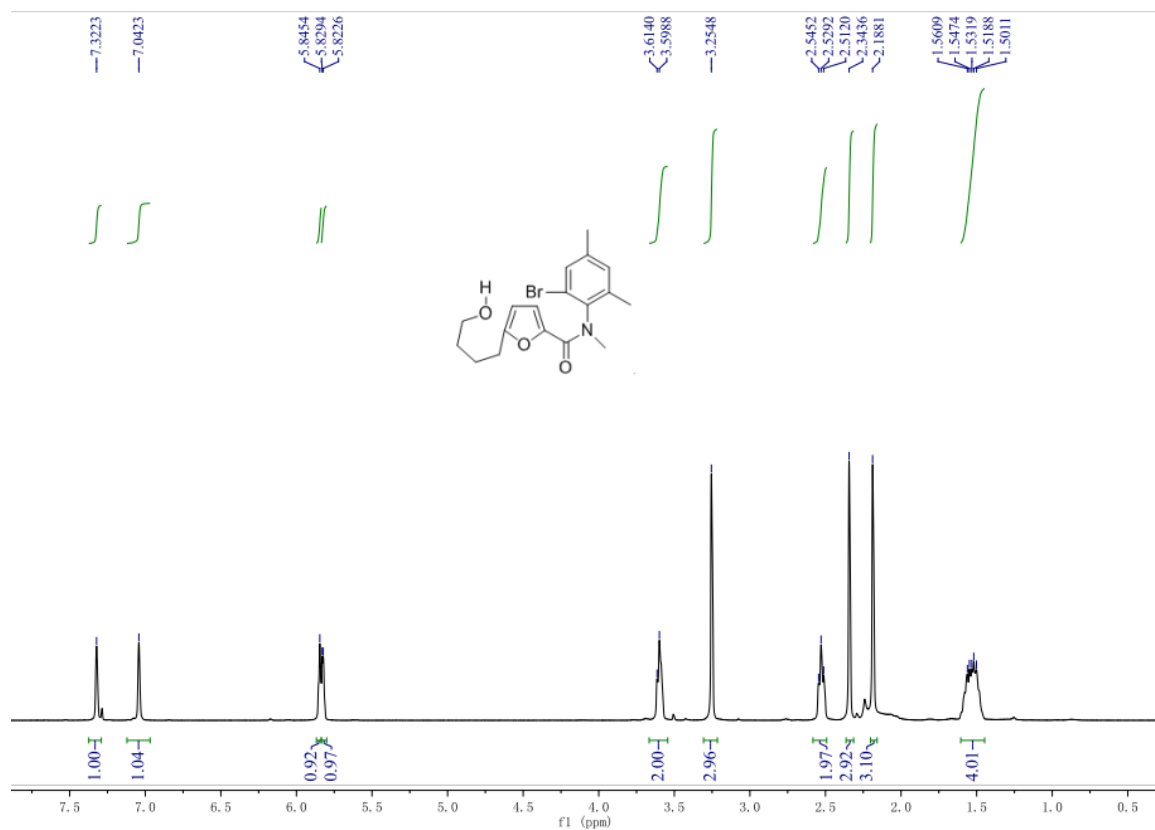

$^1\text{H}$  NMR spectrum of **1p**

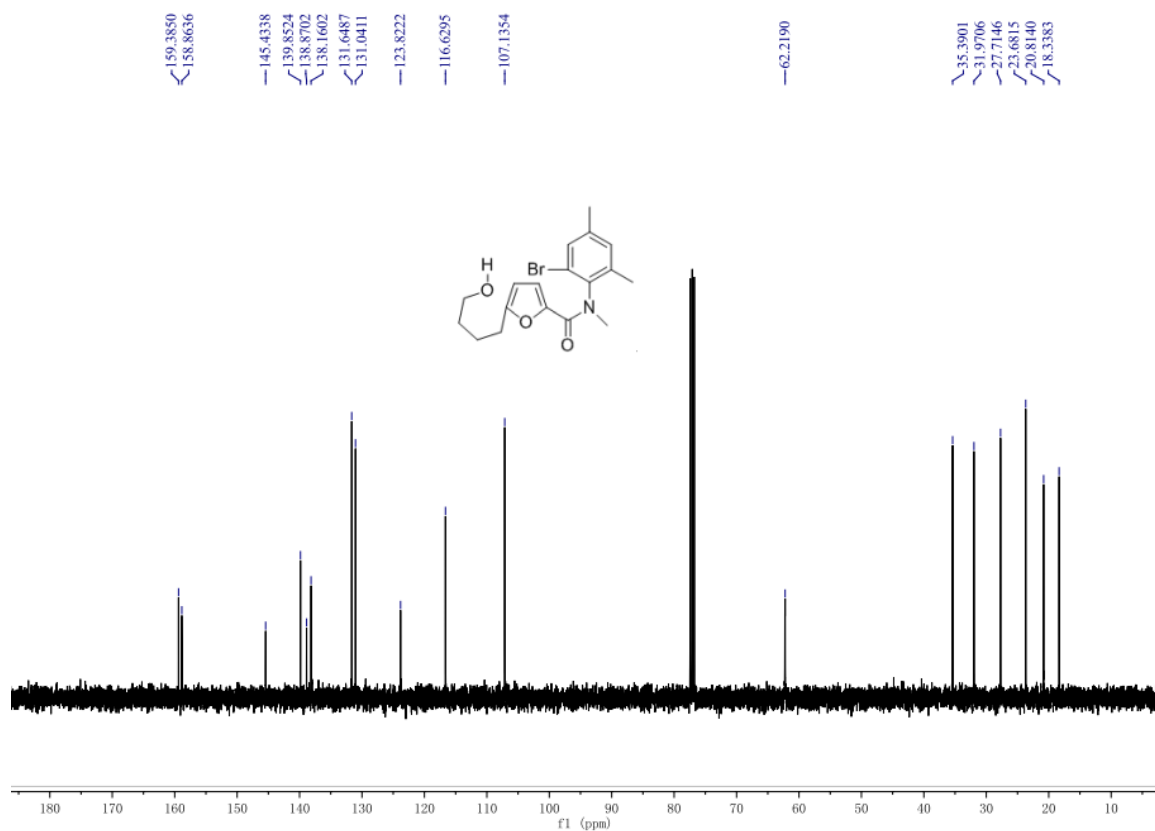

$^{13}\text{C}$  NMR spectrum of **1p**

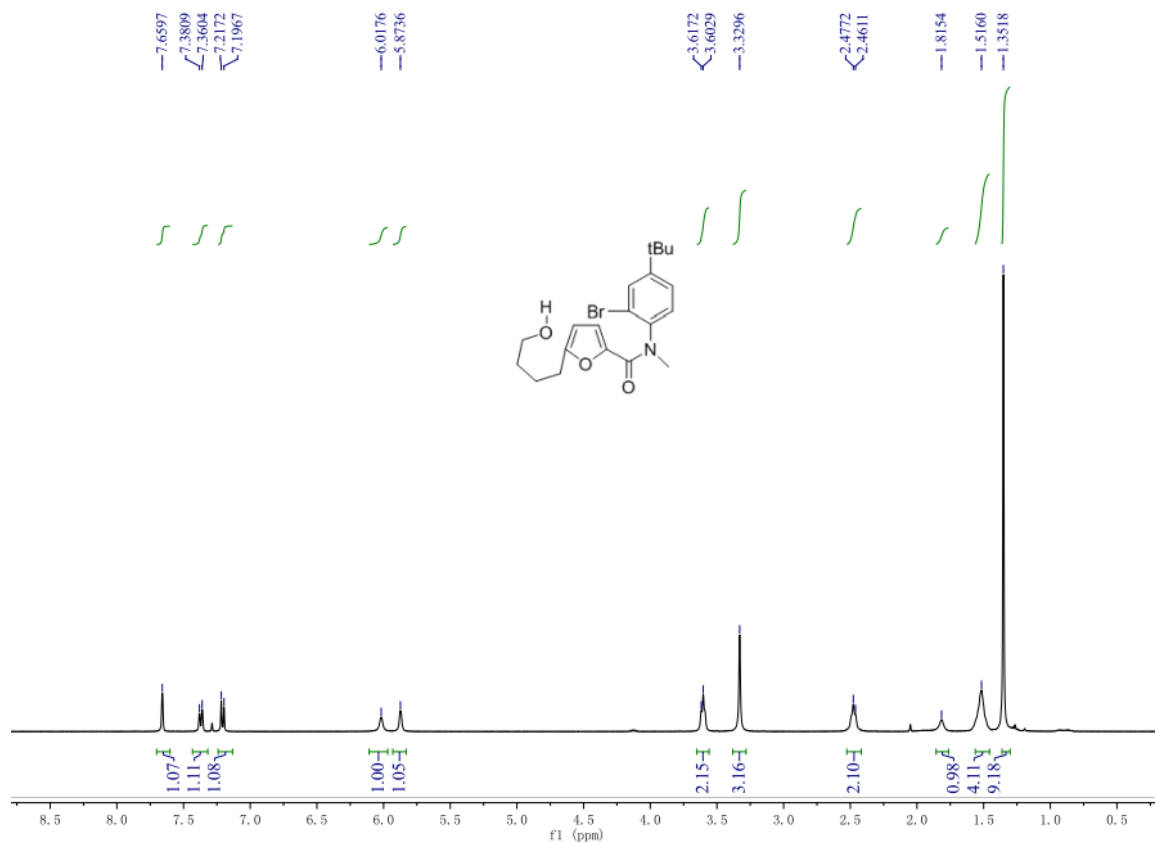

$^1\text{H}$  NMR spectrum of **1q**

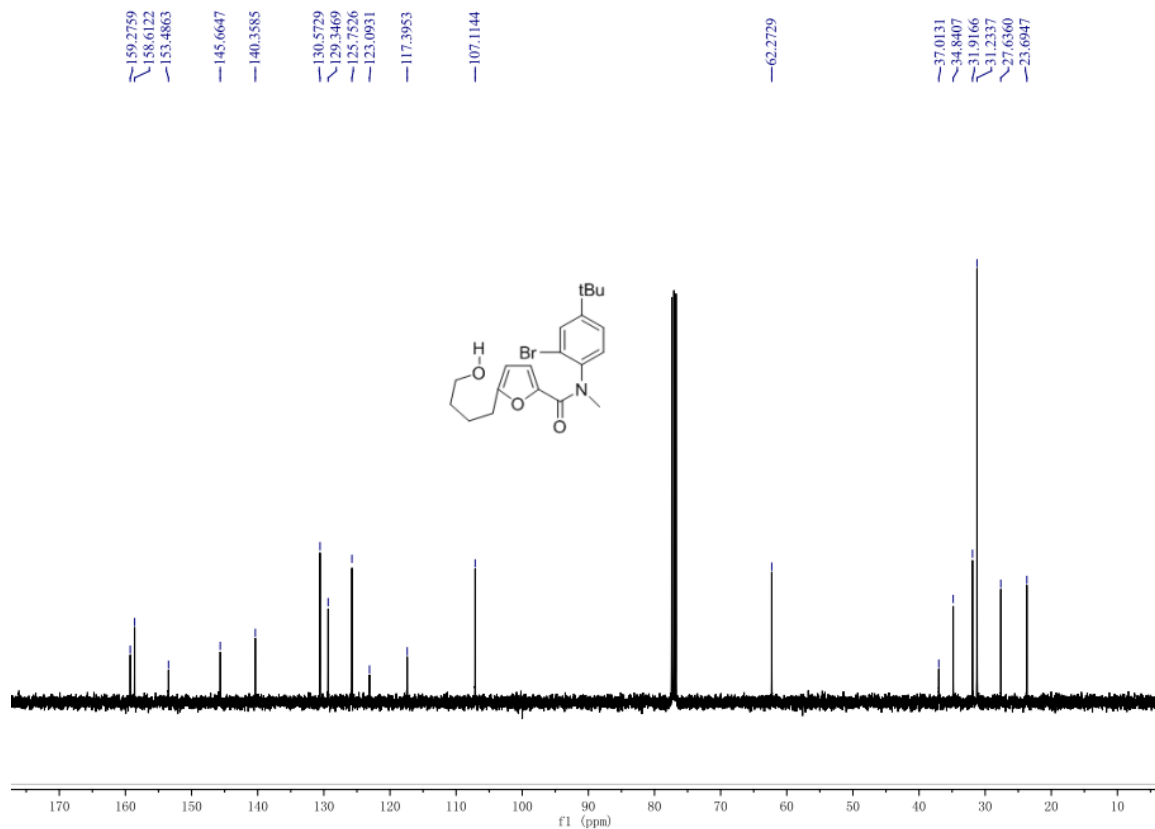

$^{13}\text{C}$  NMR spectrum of **1q**

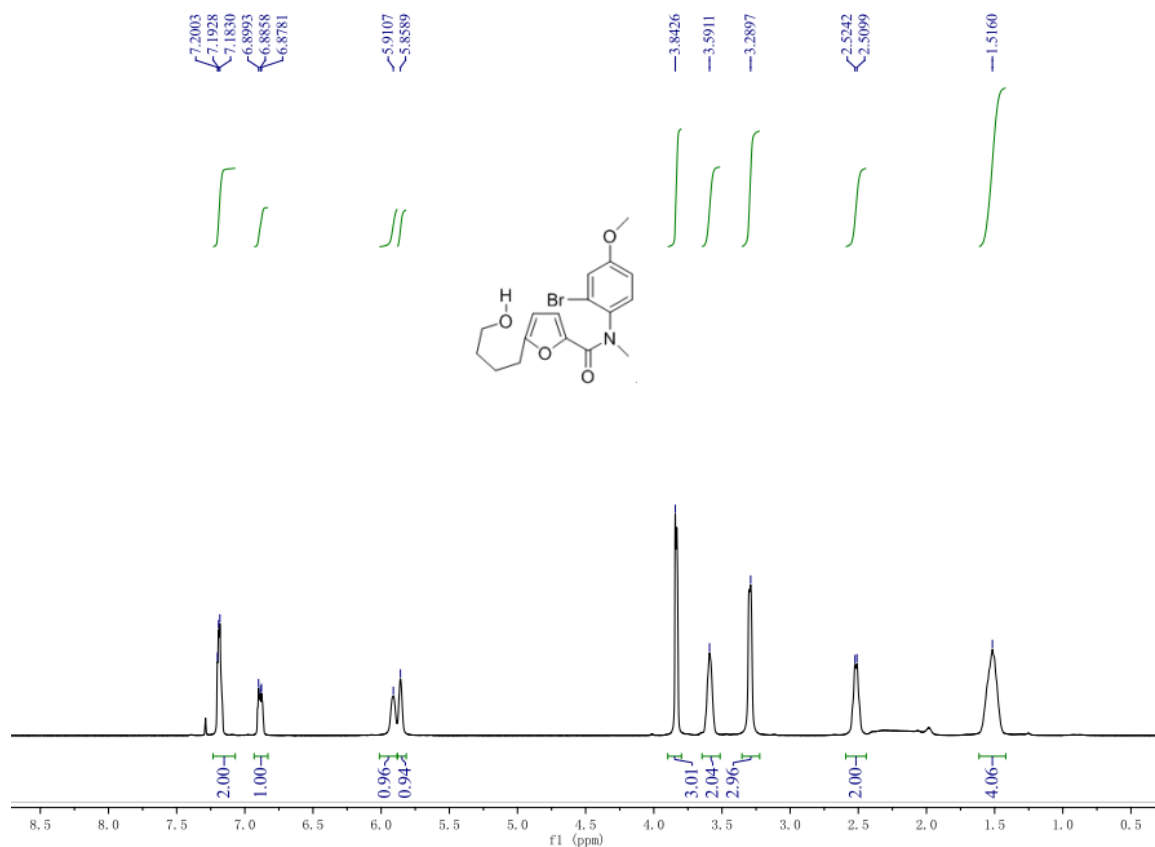

<sup>1</sup>H NMR spectrum of **1r**

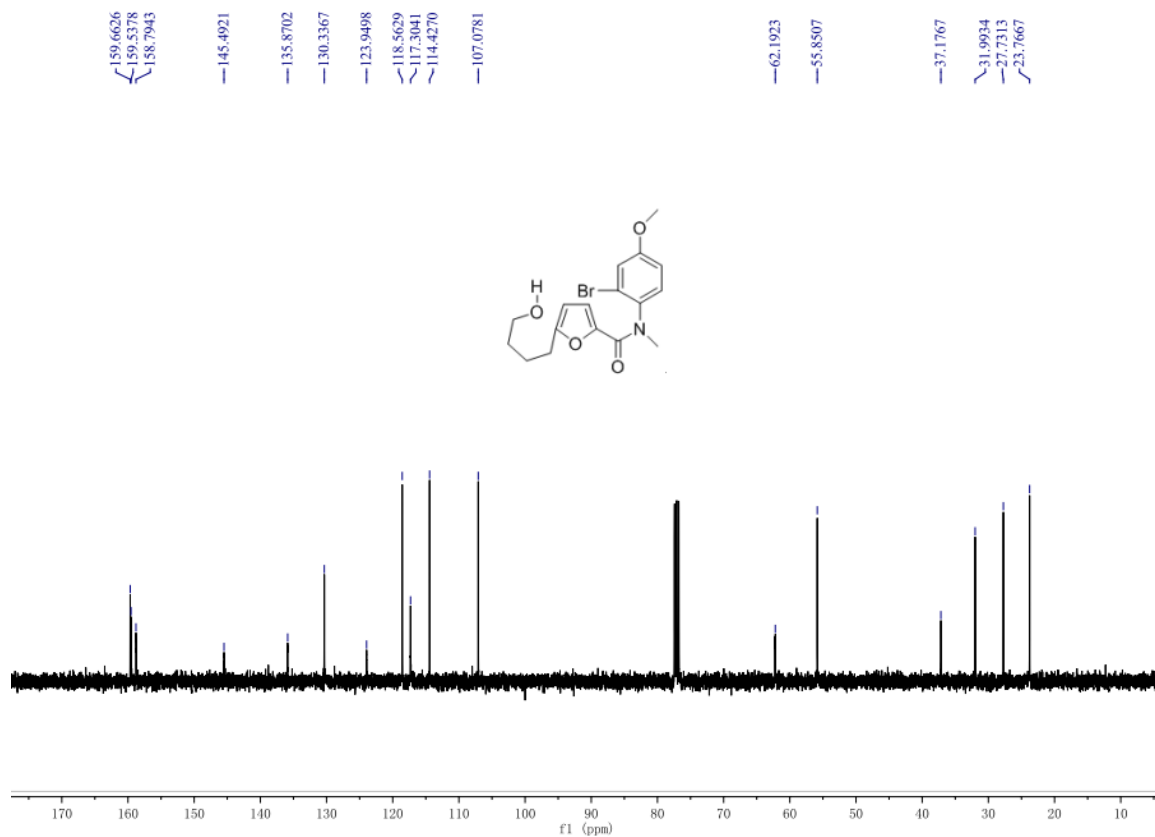

<sup>13</sup>C NMR spectrum of **1r**



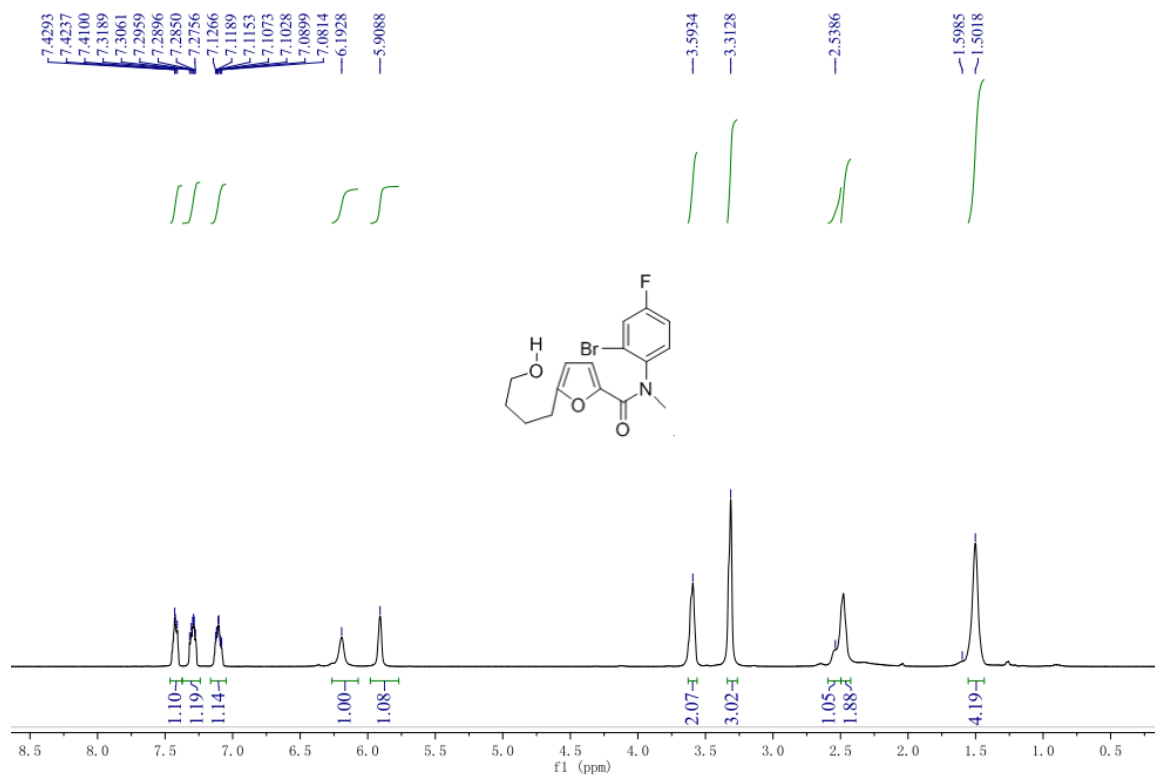

<sup>1</sup>H NMR spectrum of **1s**

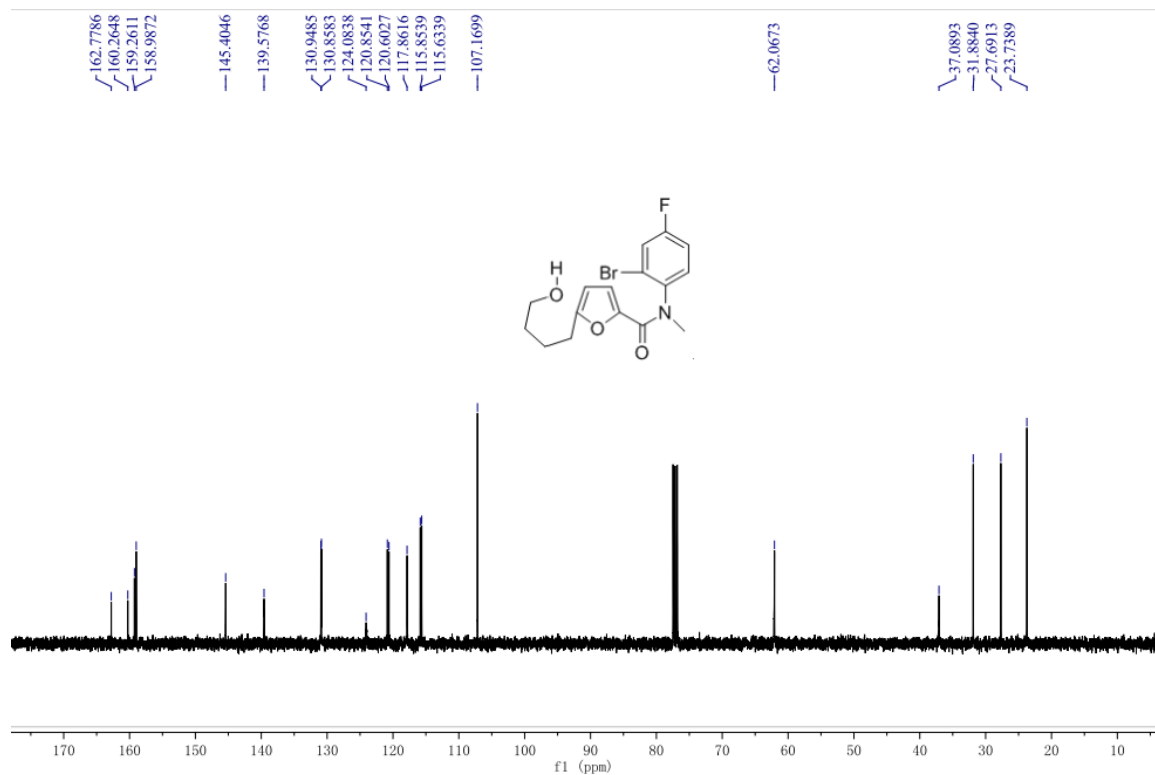

<sup>13</sup>C NMR spectrum of **1s**

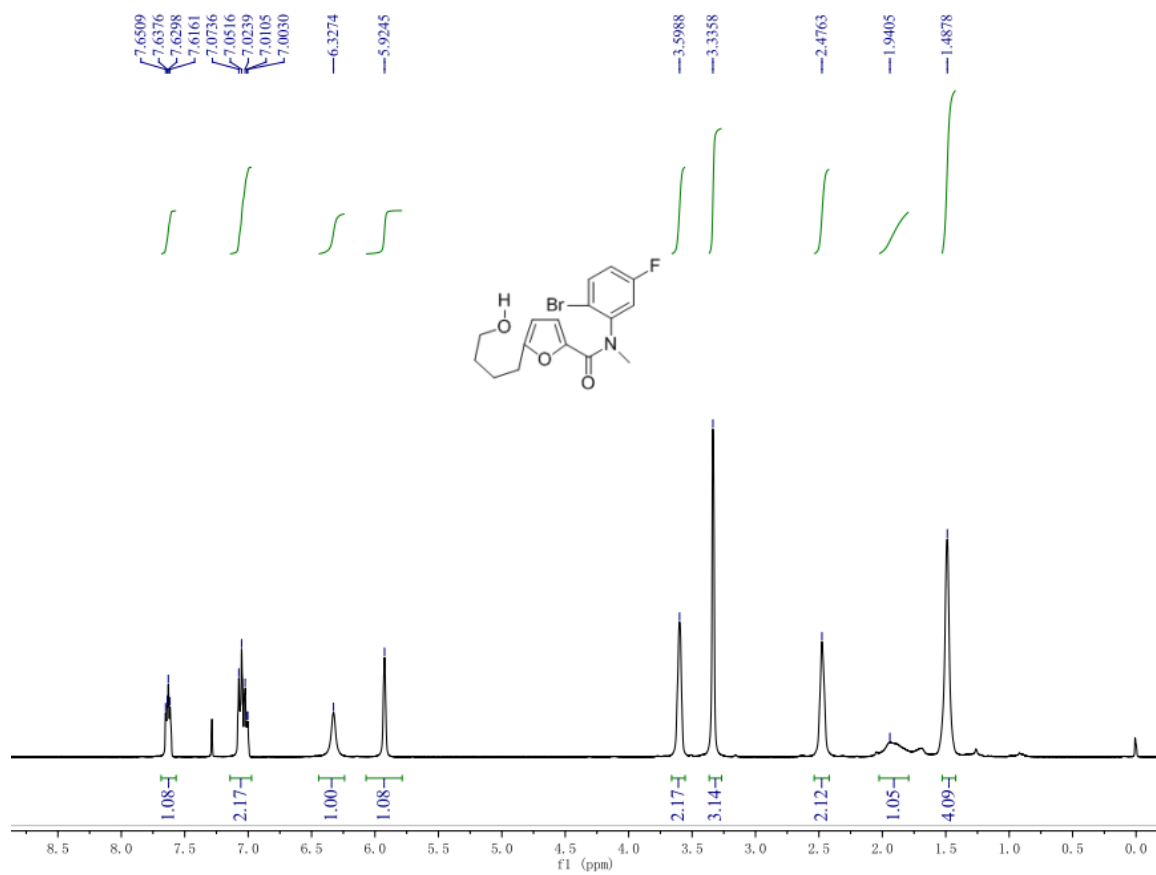

<sup>1</sup>H NMR spectrum of **1t**

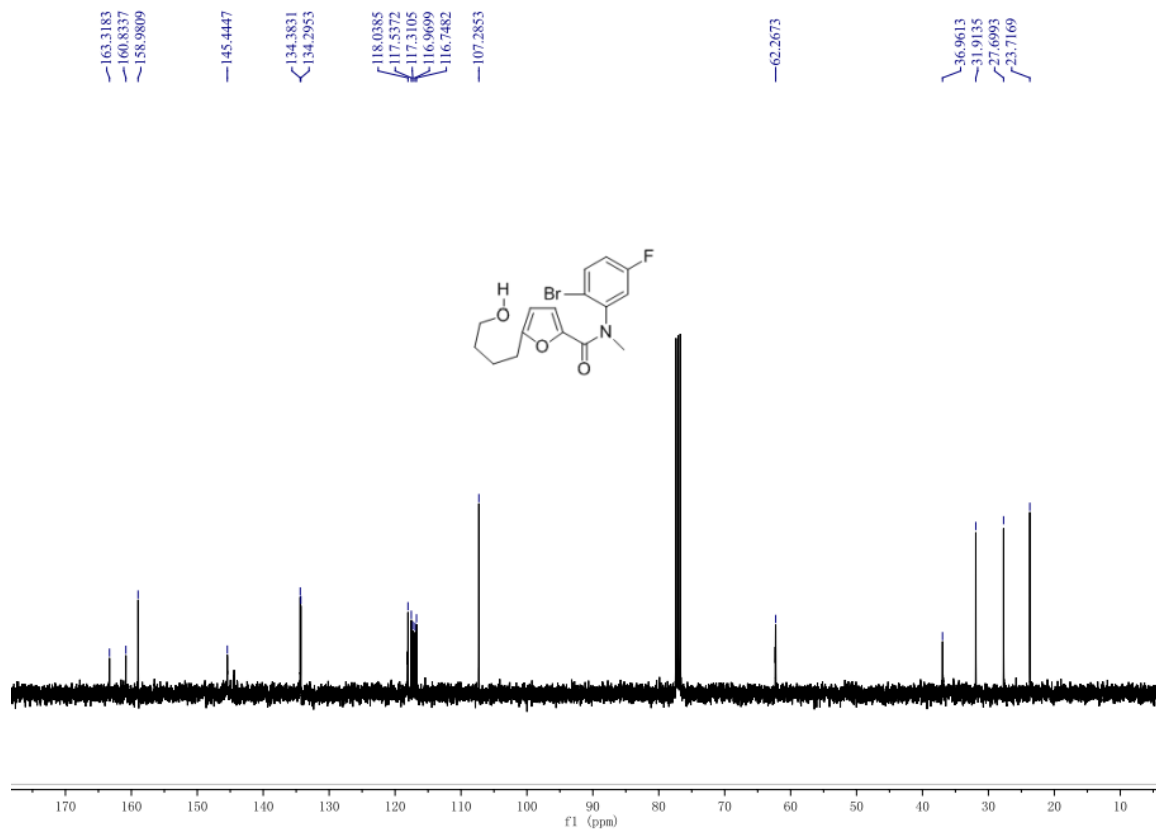

<sup>13</sup>C NMR spectrum of **1t**

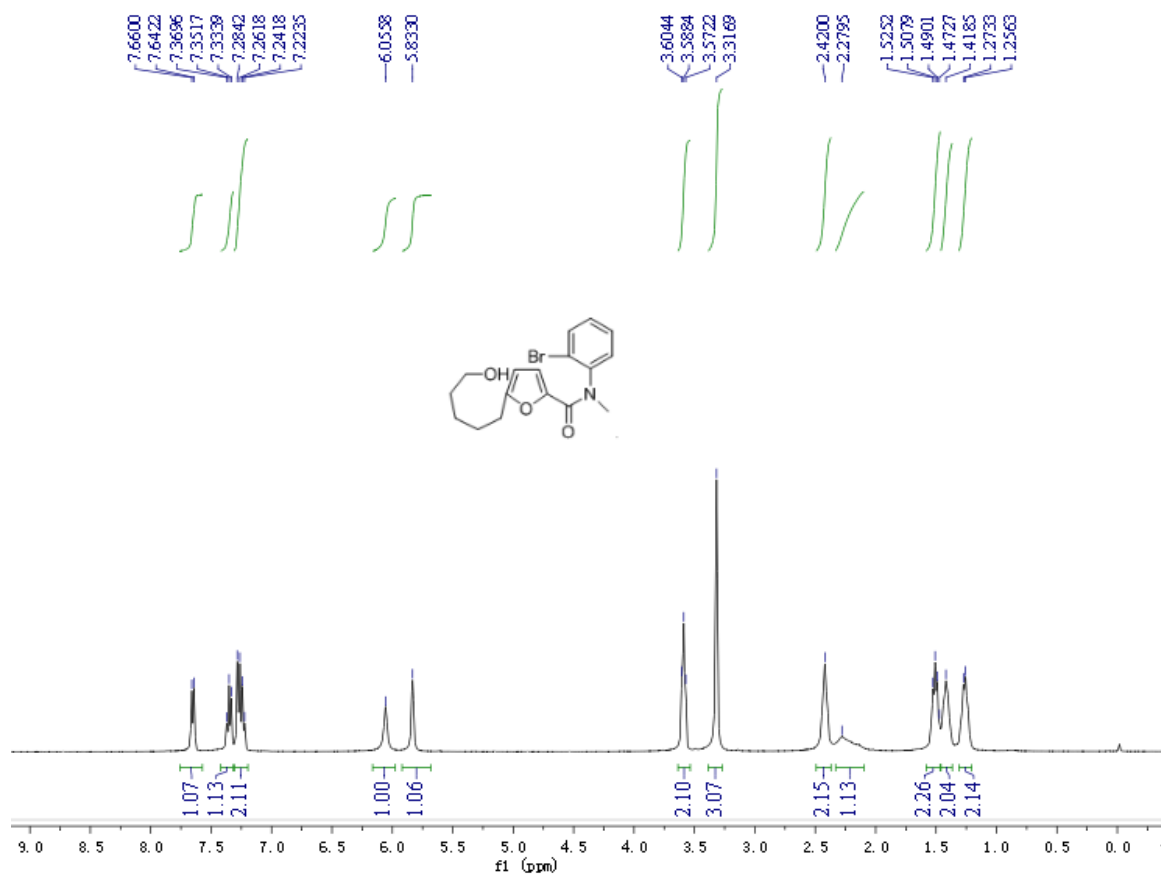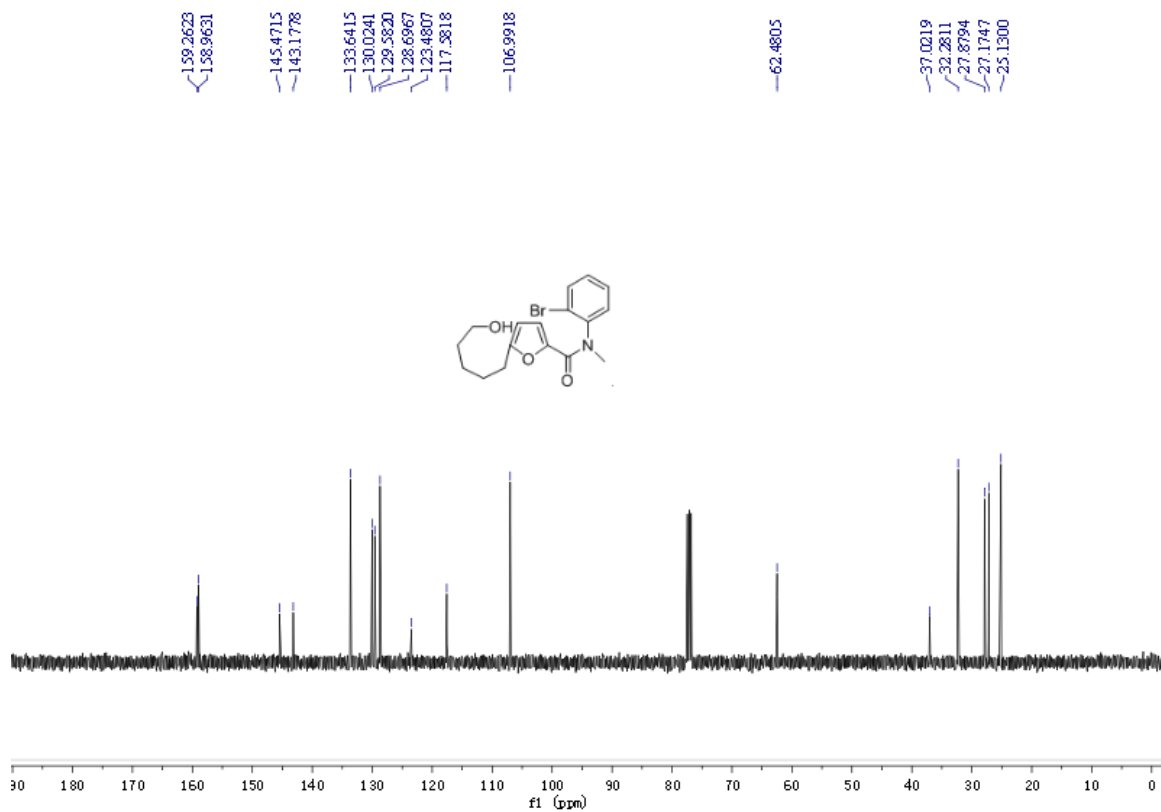

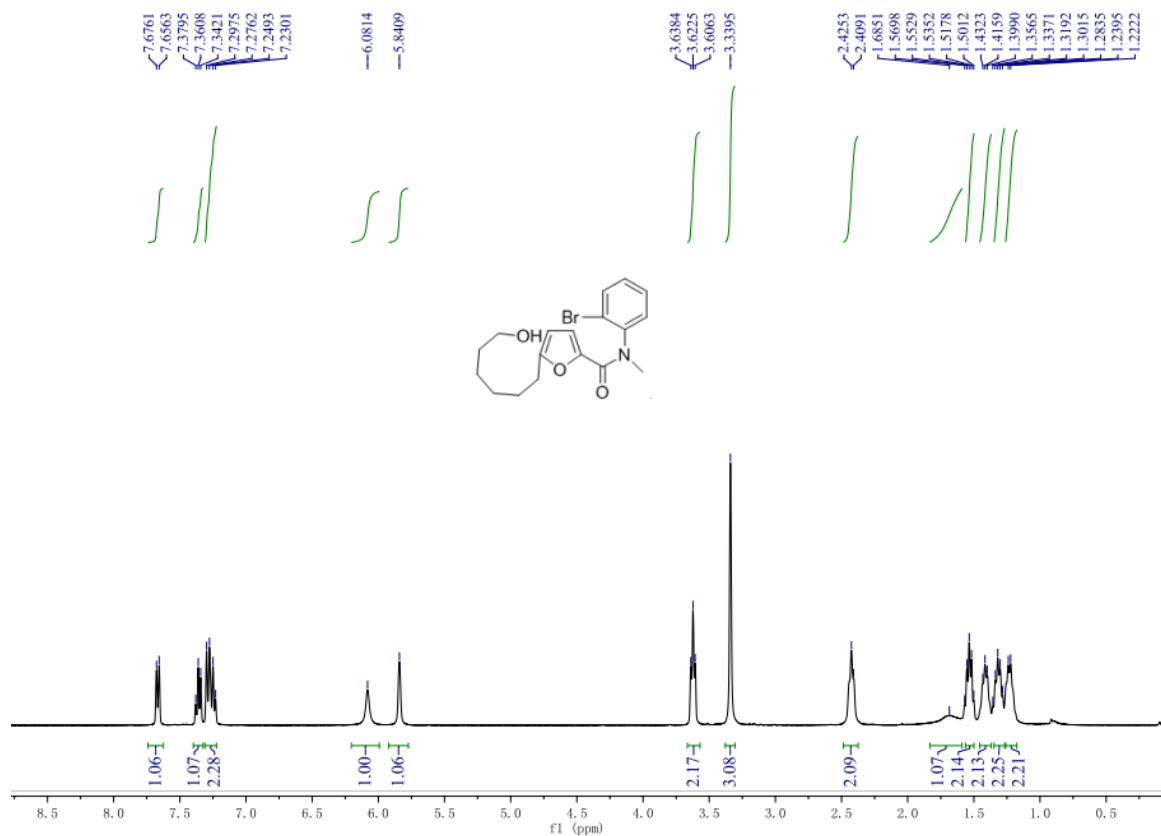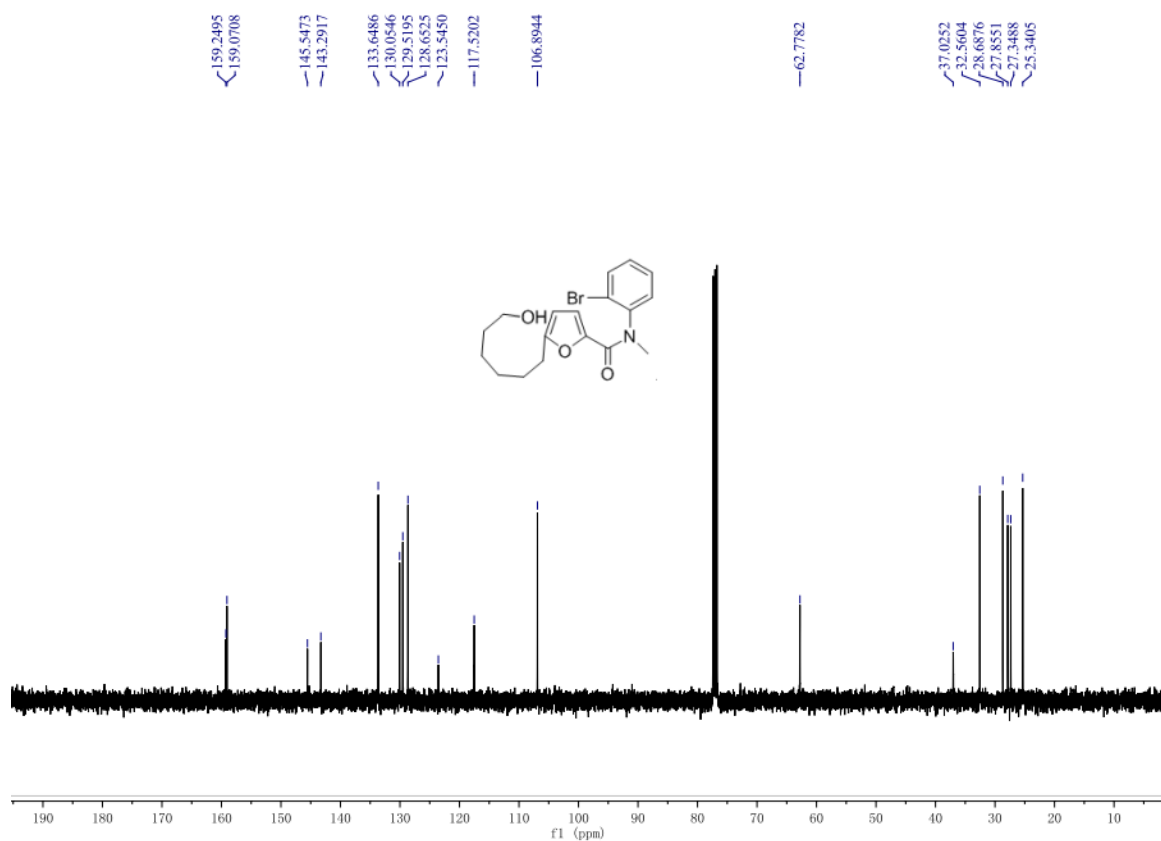

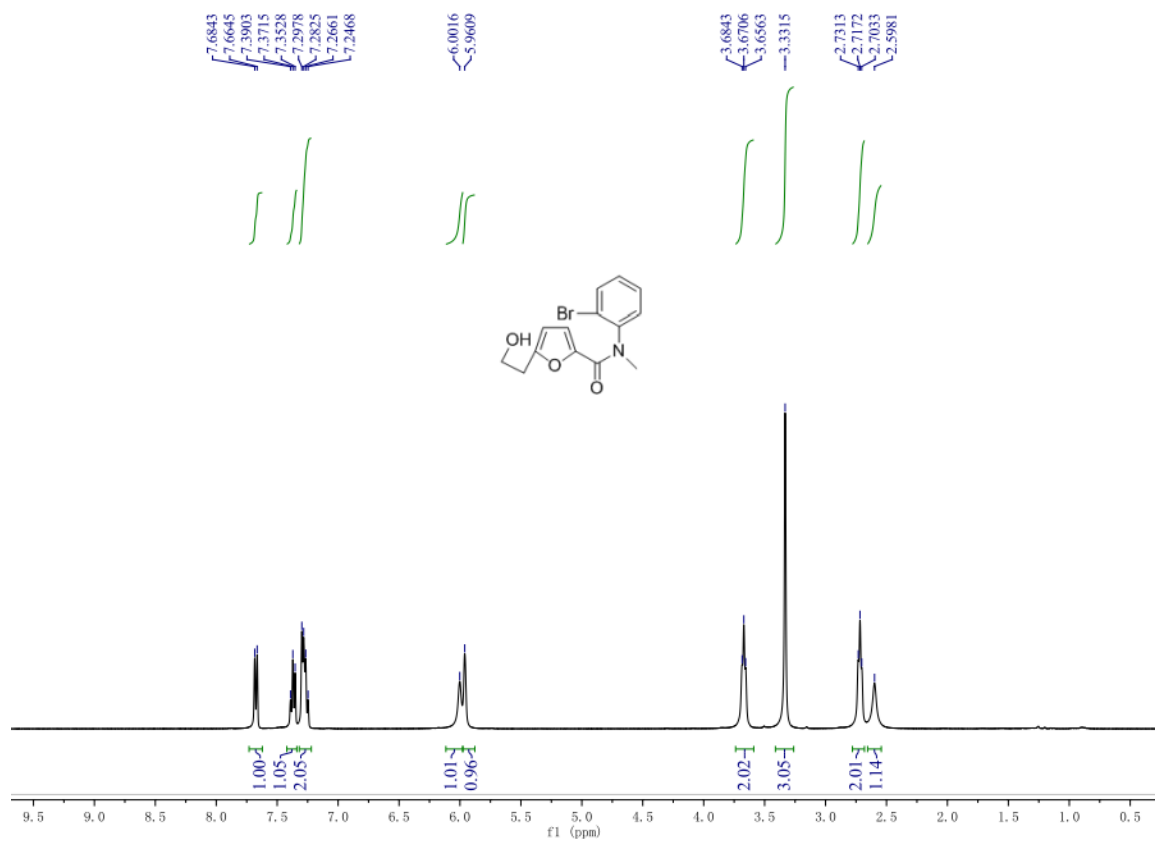

<sup>1</sup>H NMR spectrum of **1w**

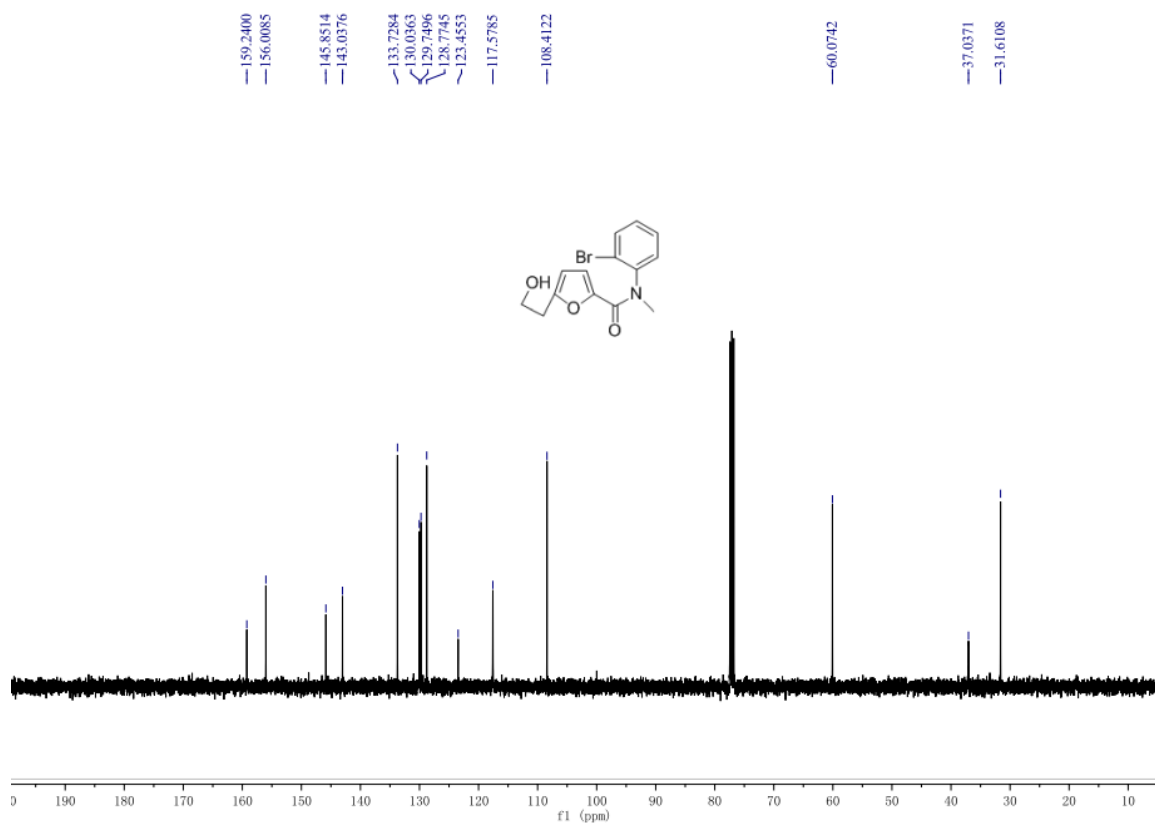

<sup>13</sup>C NMR spectrum of **1w**

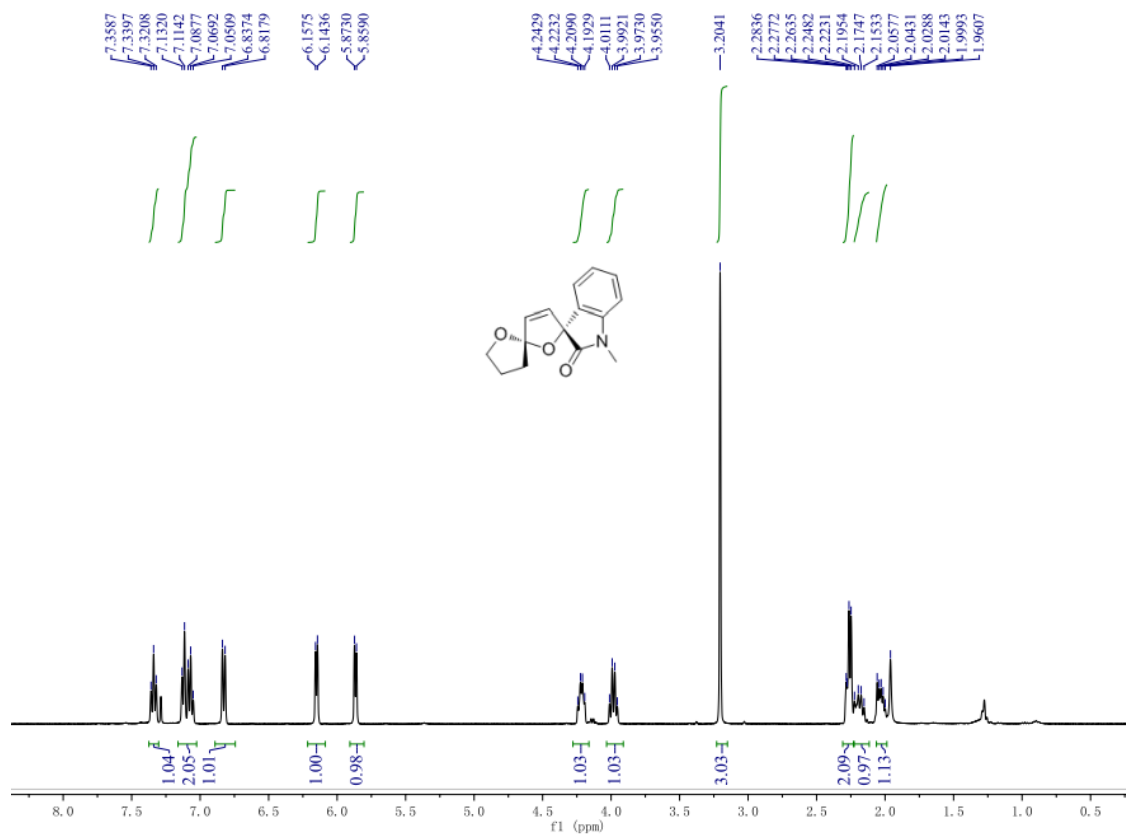

<sup>1</sup>H NMR spectrum of **2a**

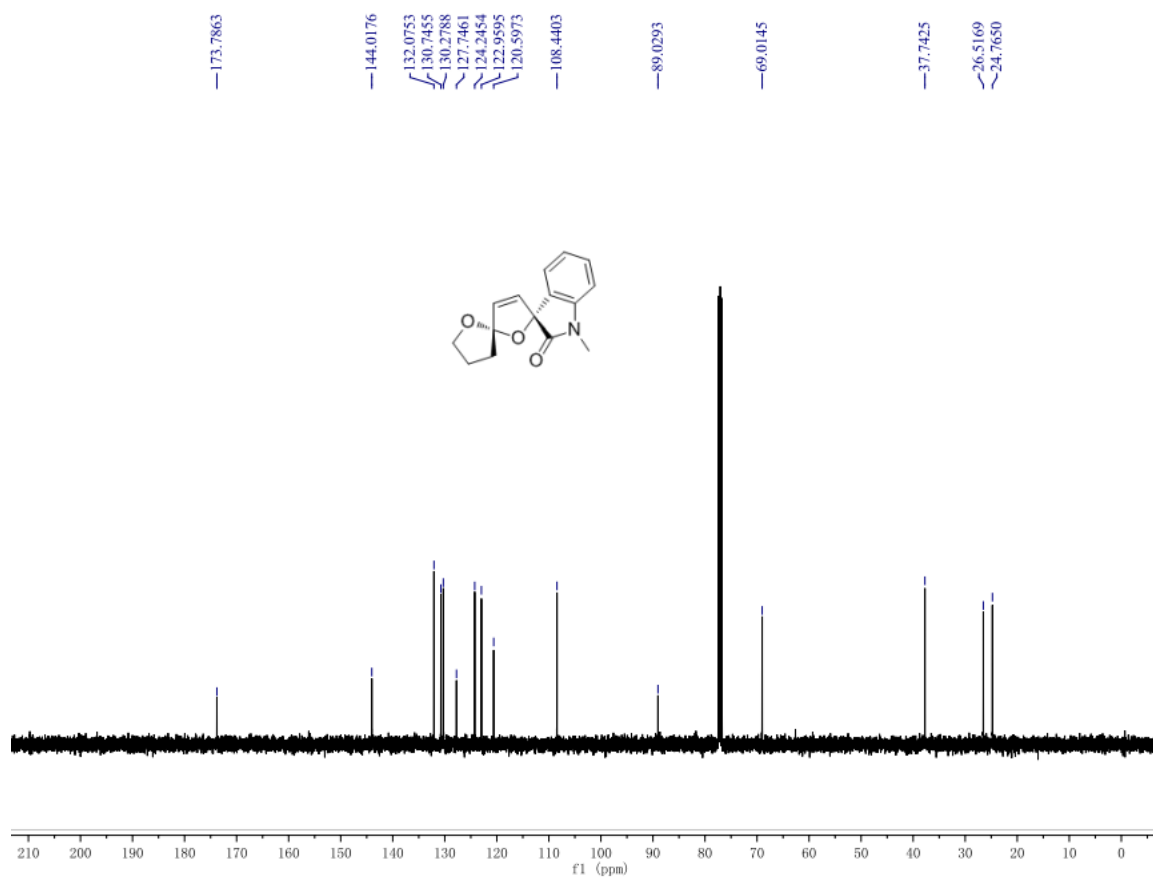

<sup>13</sup>C NMR spectrum of **2a**

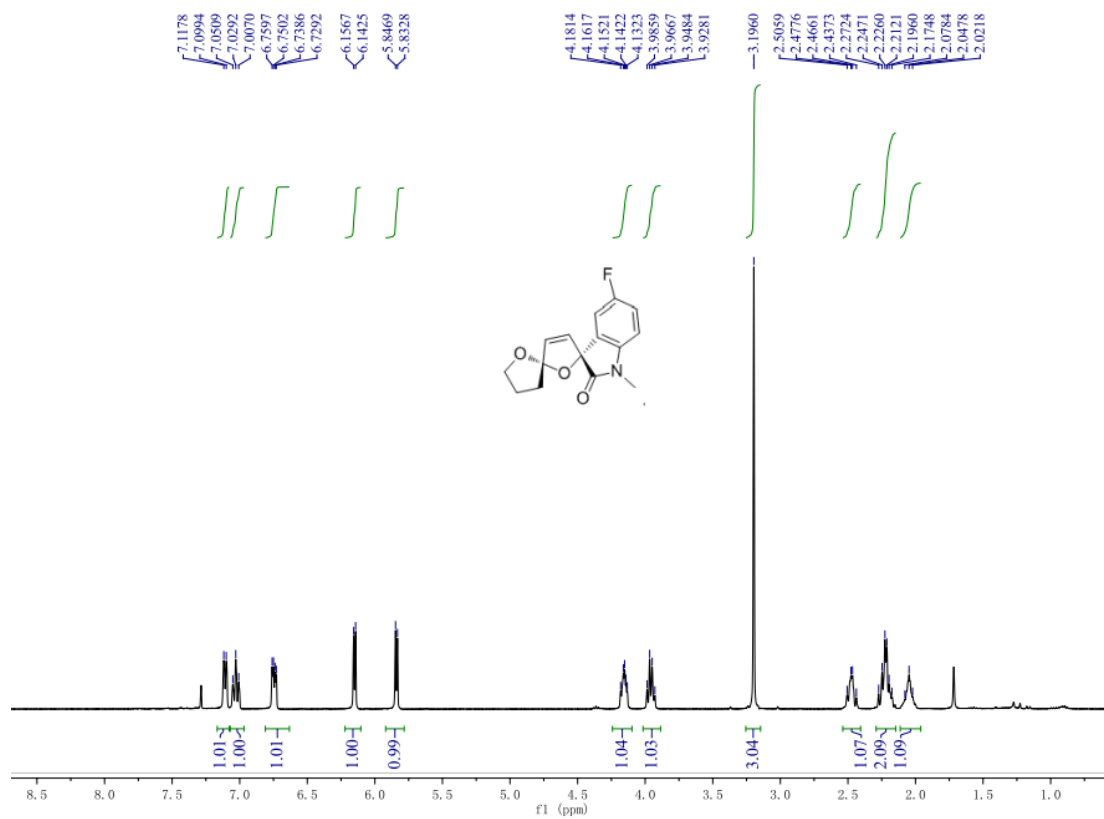

<sup>1</sup>H NMR spectrum of **2b**

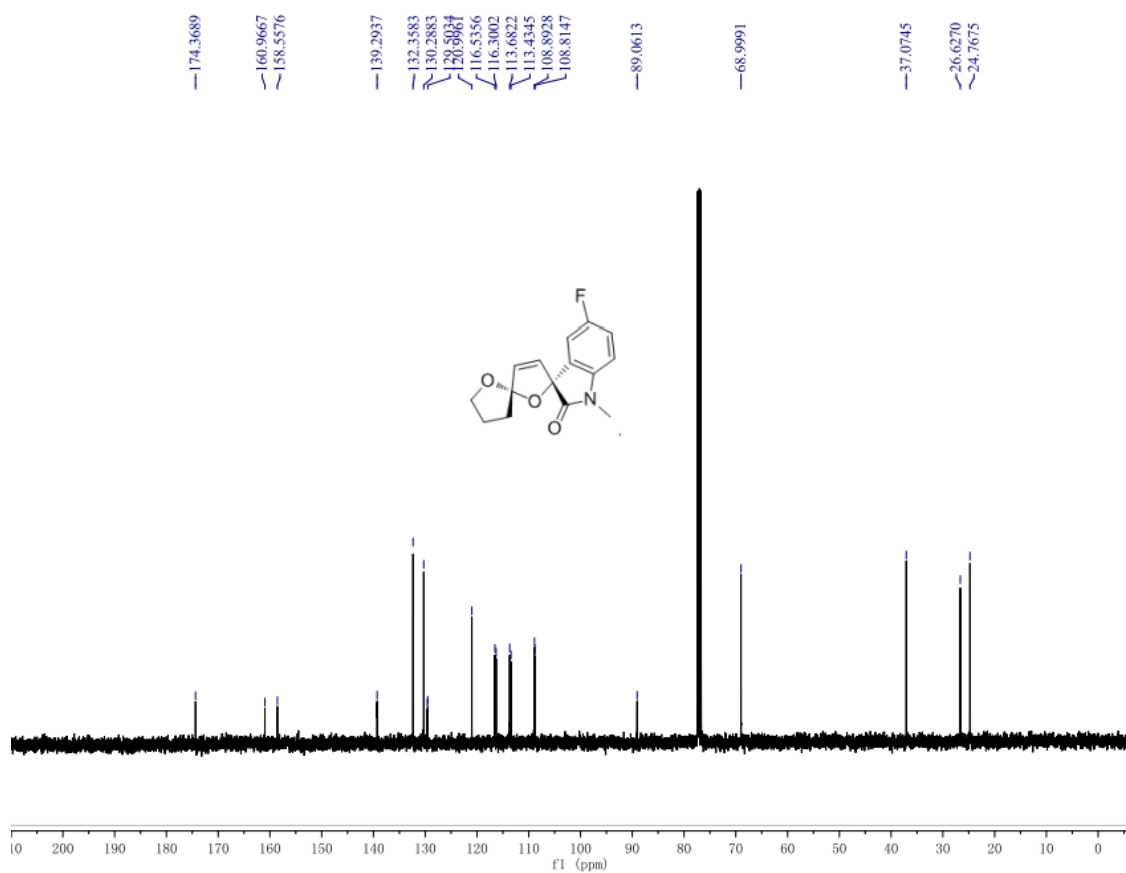

<sup>13</sup>C NMR spectrum of **2b**

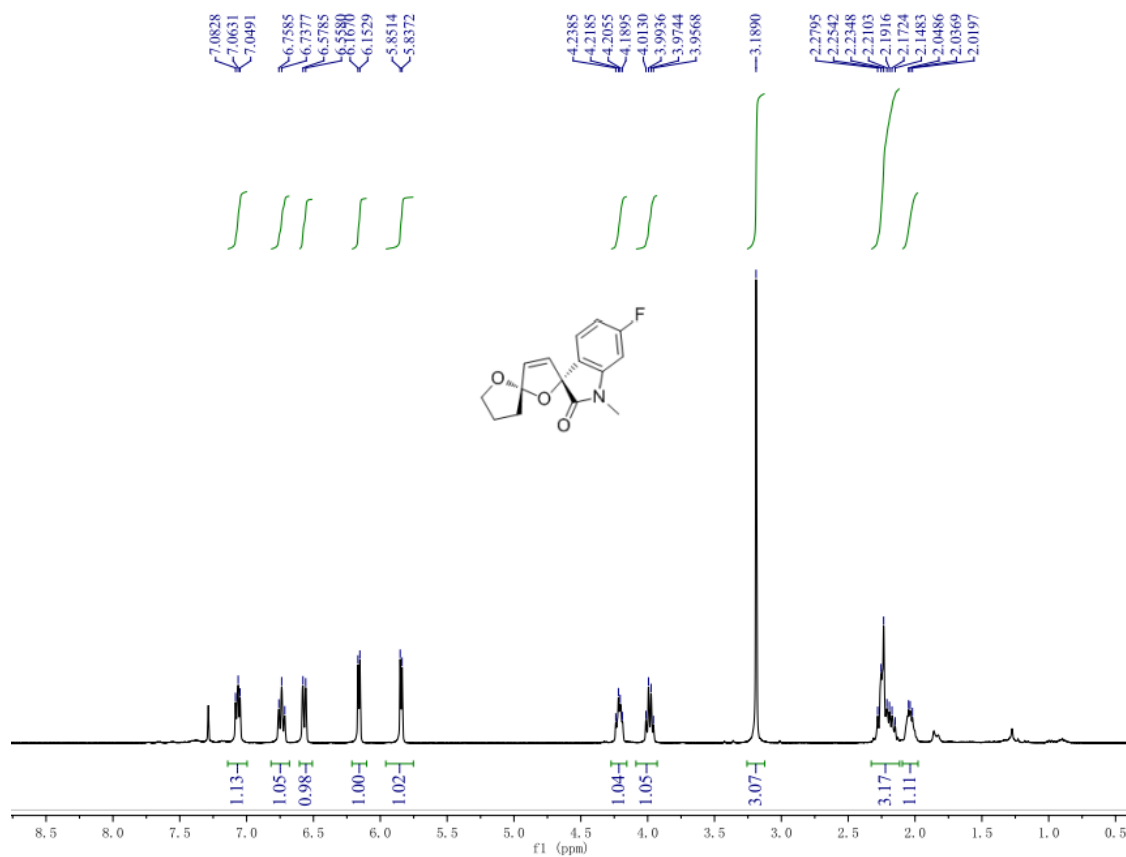

<sup>1</sup>H NMR spectrum of 2c

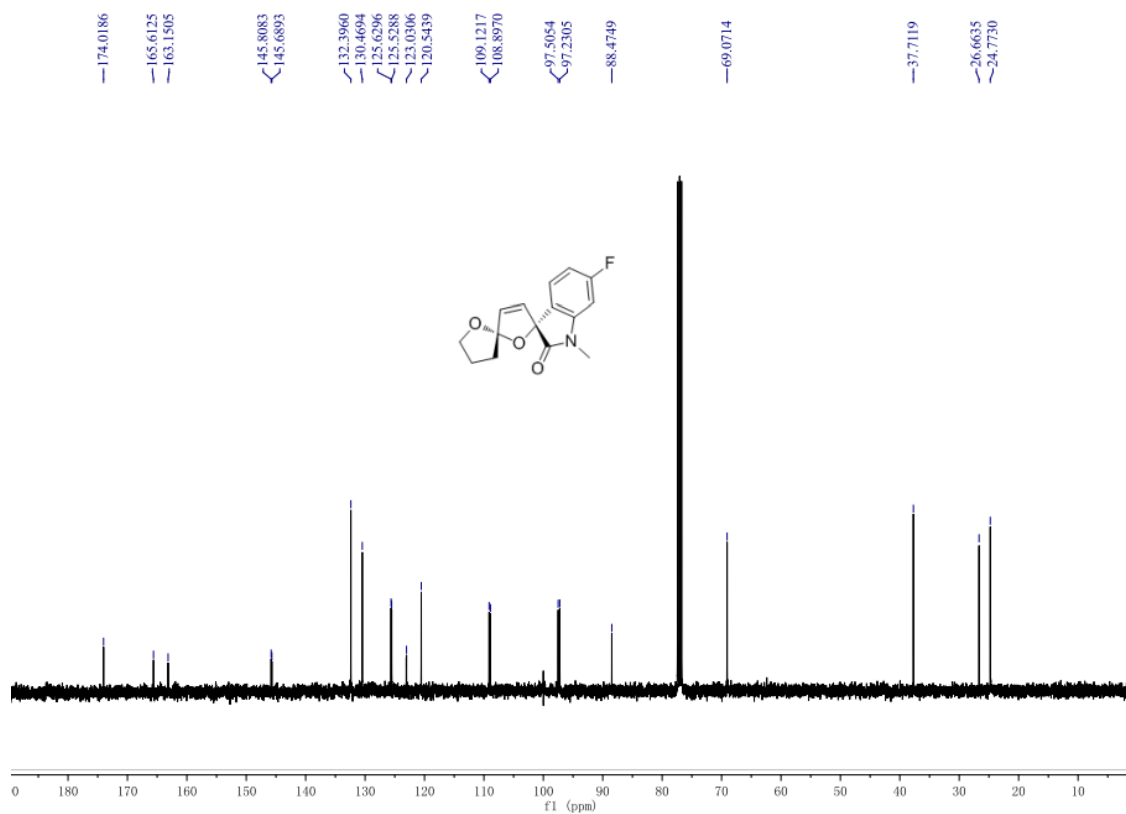

<sup>13</sup>C NMR spectrum of 2c



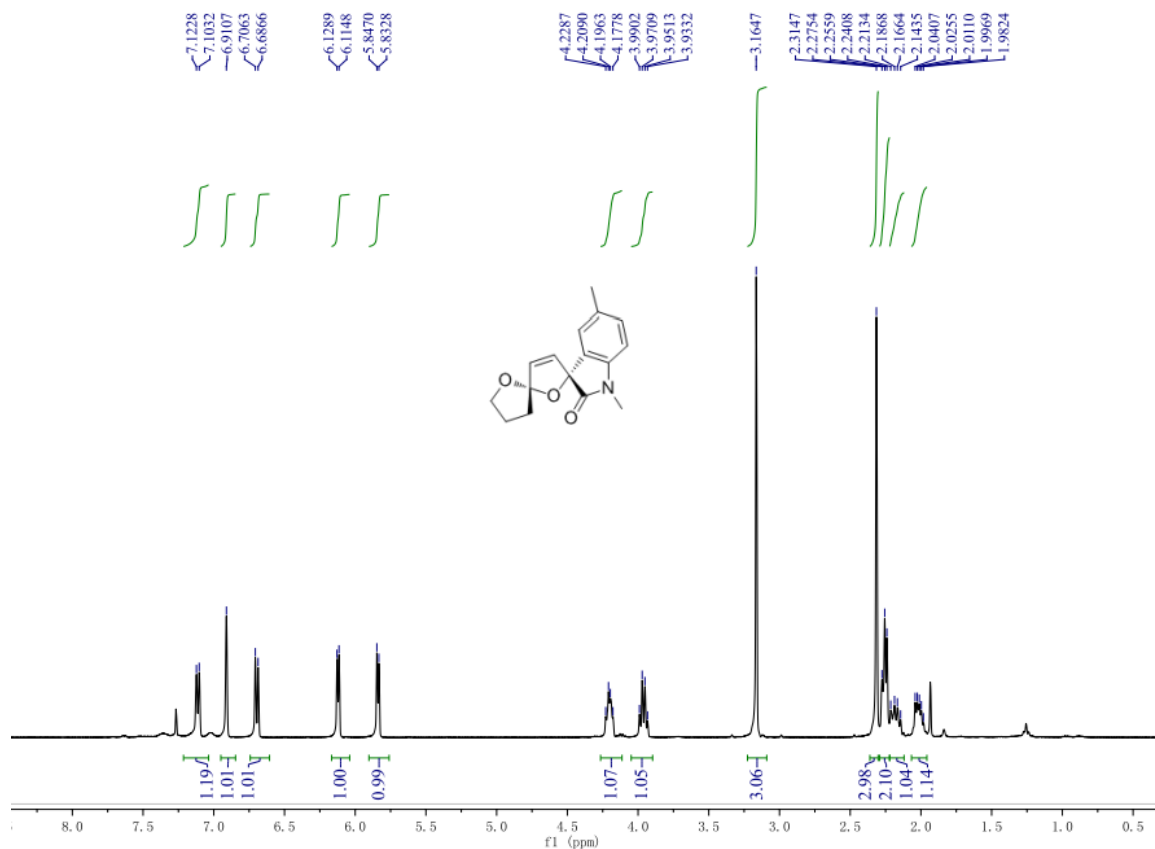

$^1\text{H}$  NMR spectrum of **2d**

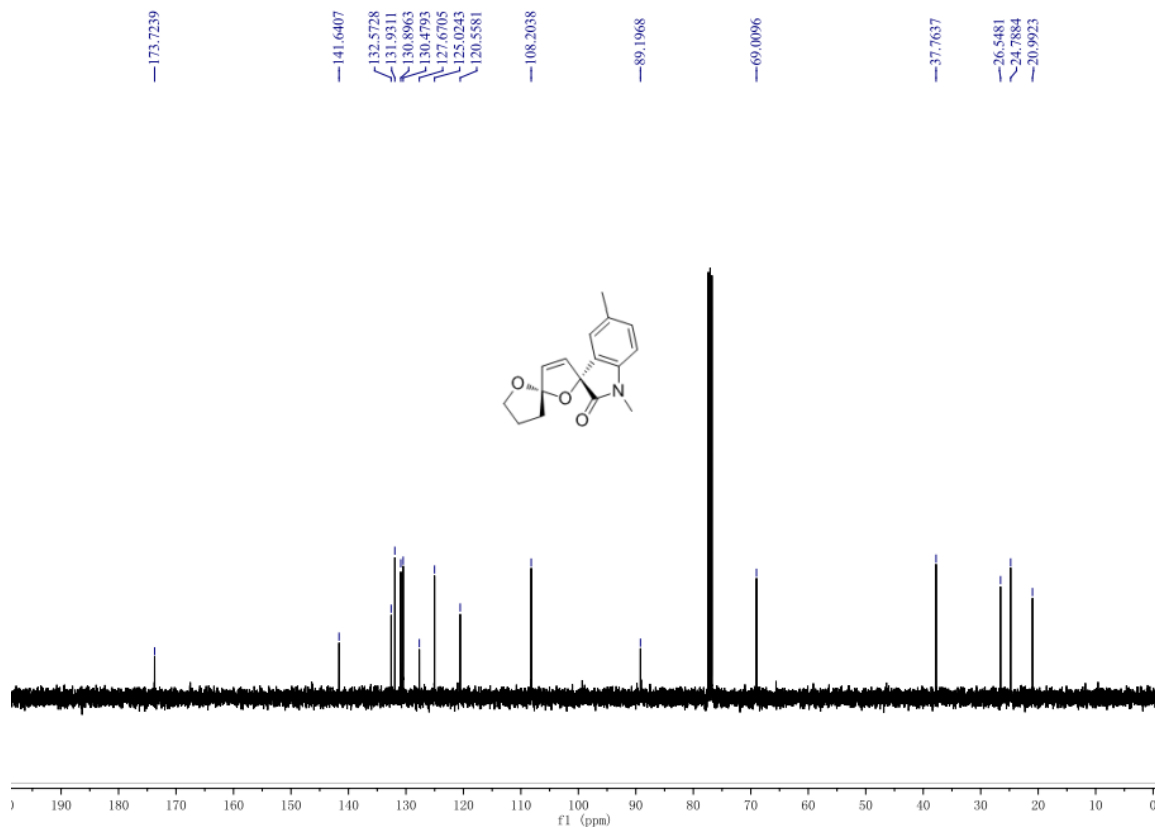

$^{13}\text{C}$  NMR spectrum of **2d**

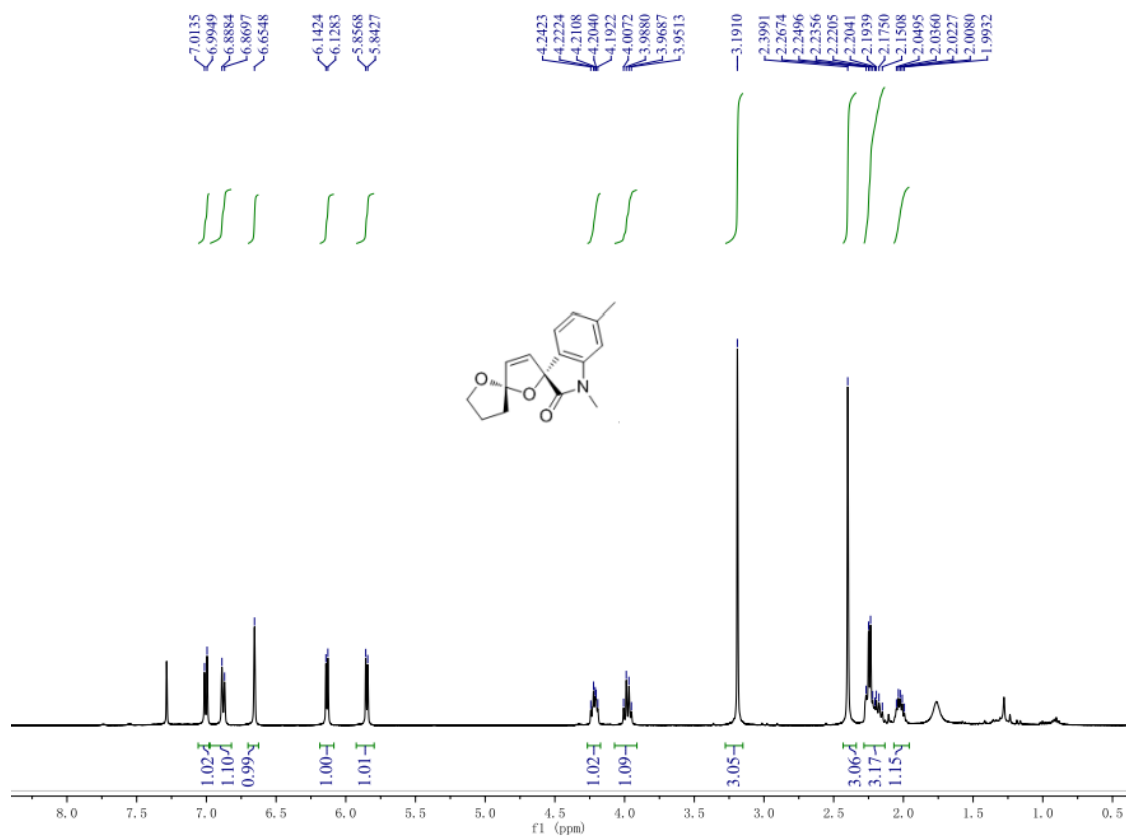

<sup>1</sup>H NMR spectrum of **2e**

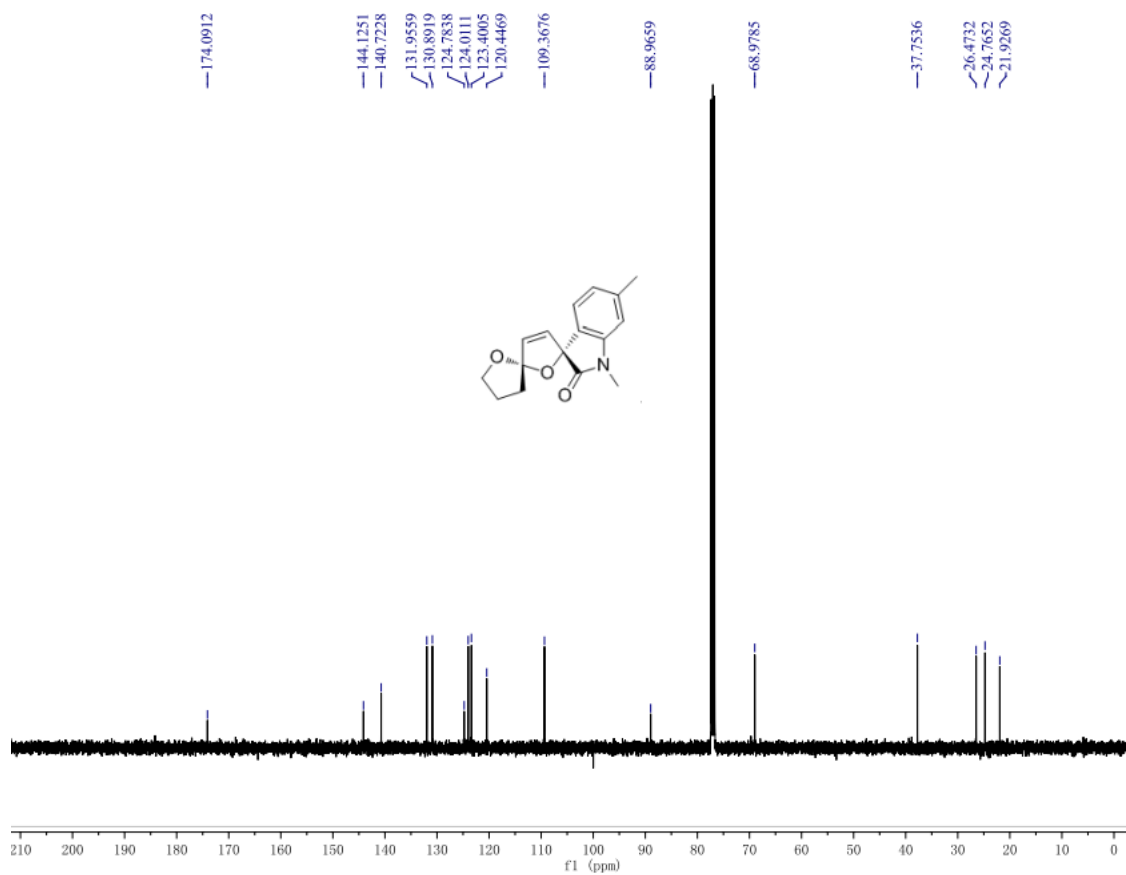

<sup>13</sup>C NMR spectrum of **2e**

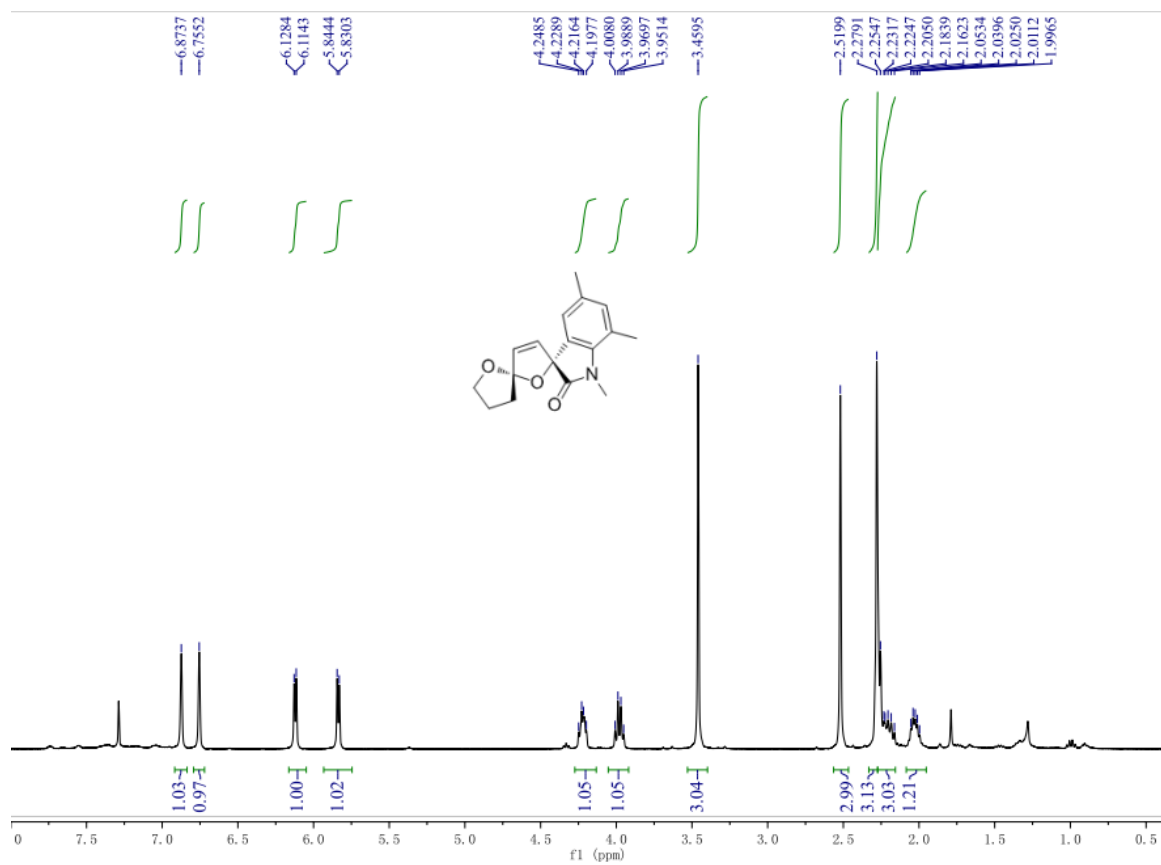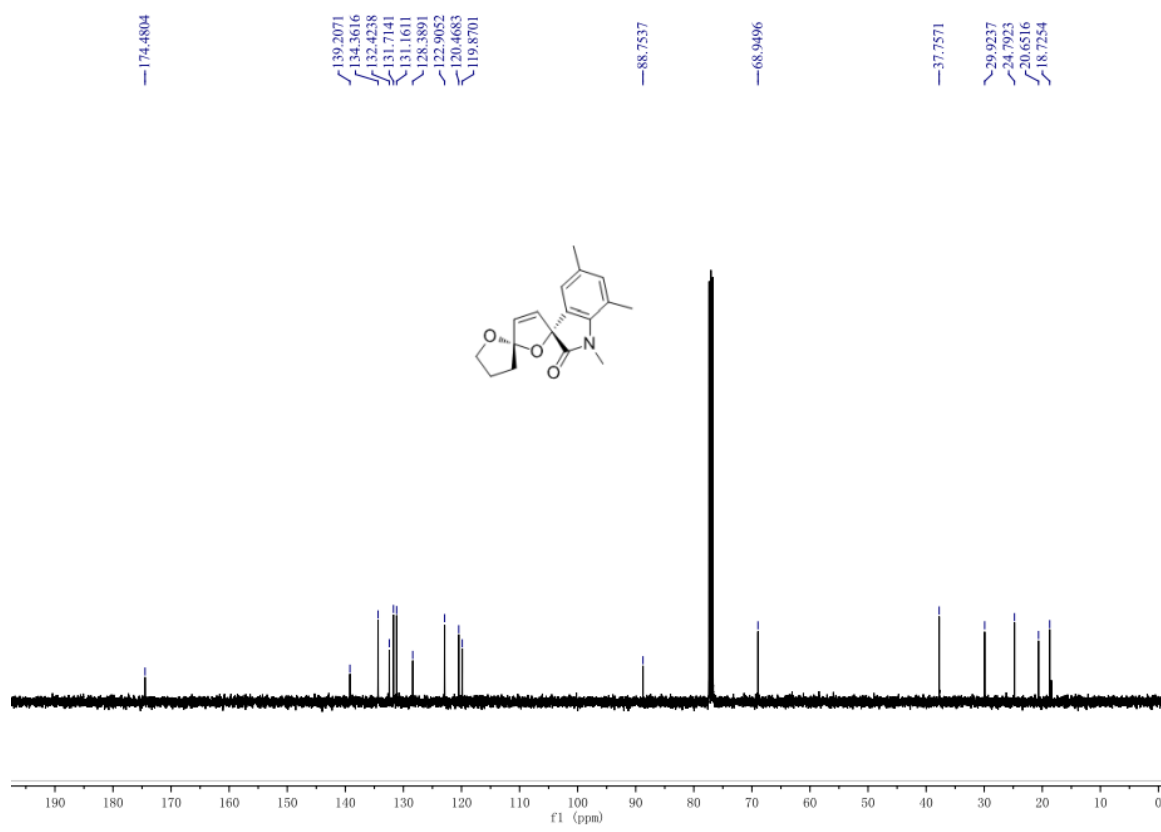

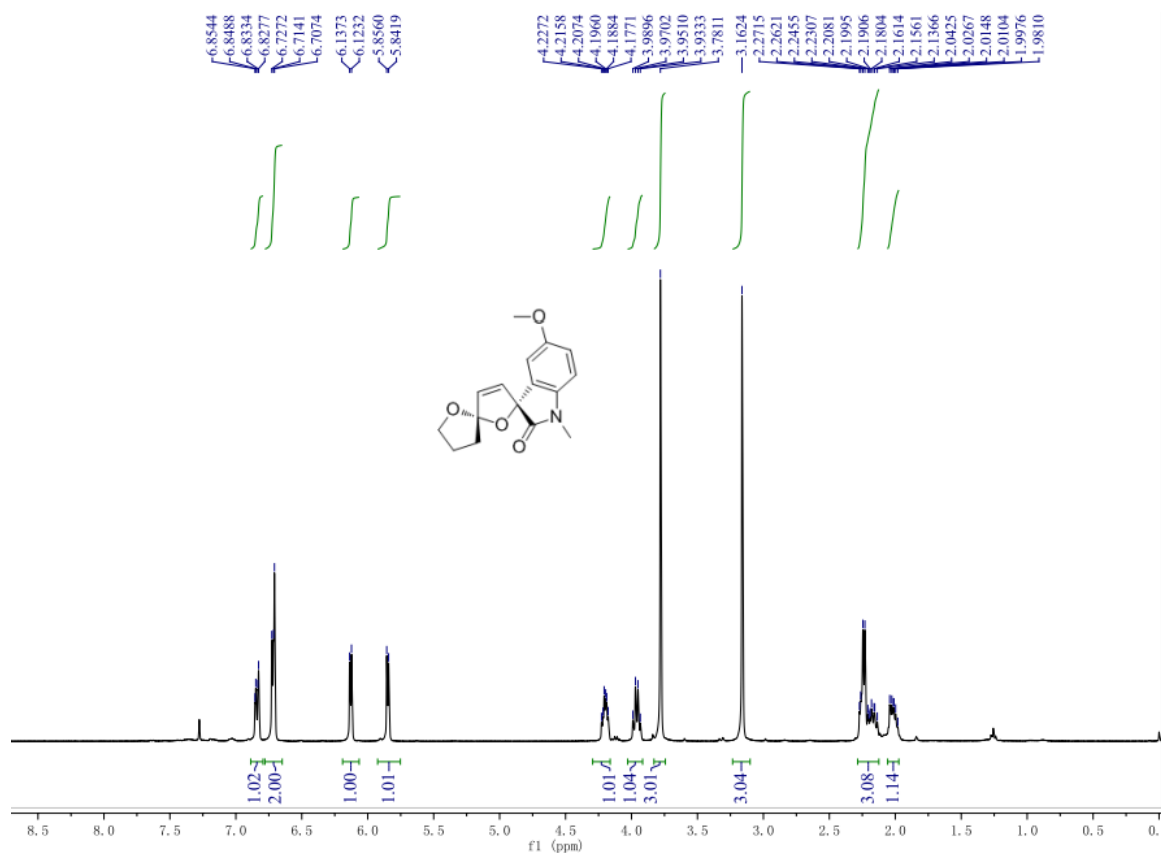

<sup>1</sup>H NMR spectrum of 2g

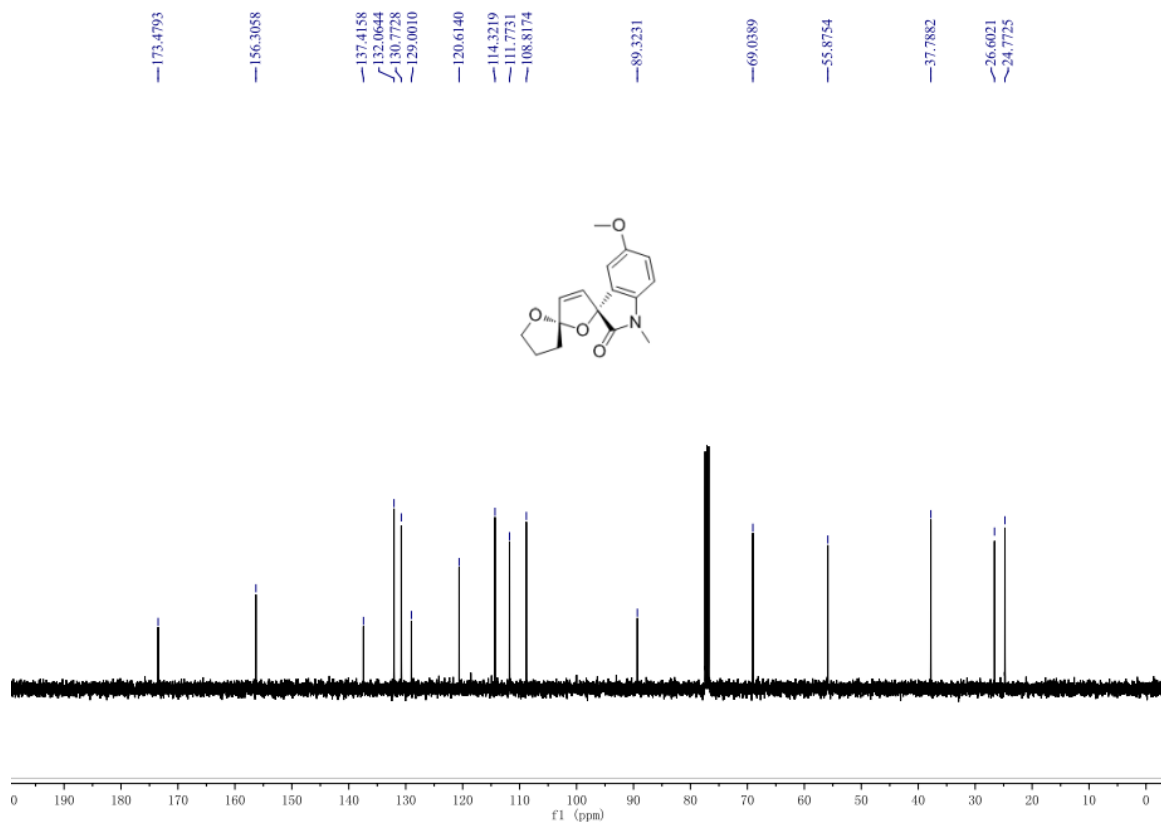

<sup>13</sup>C NMR spectrum of 2g

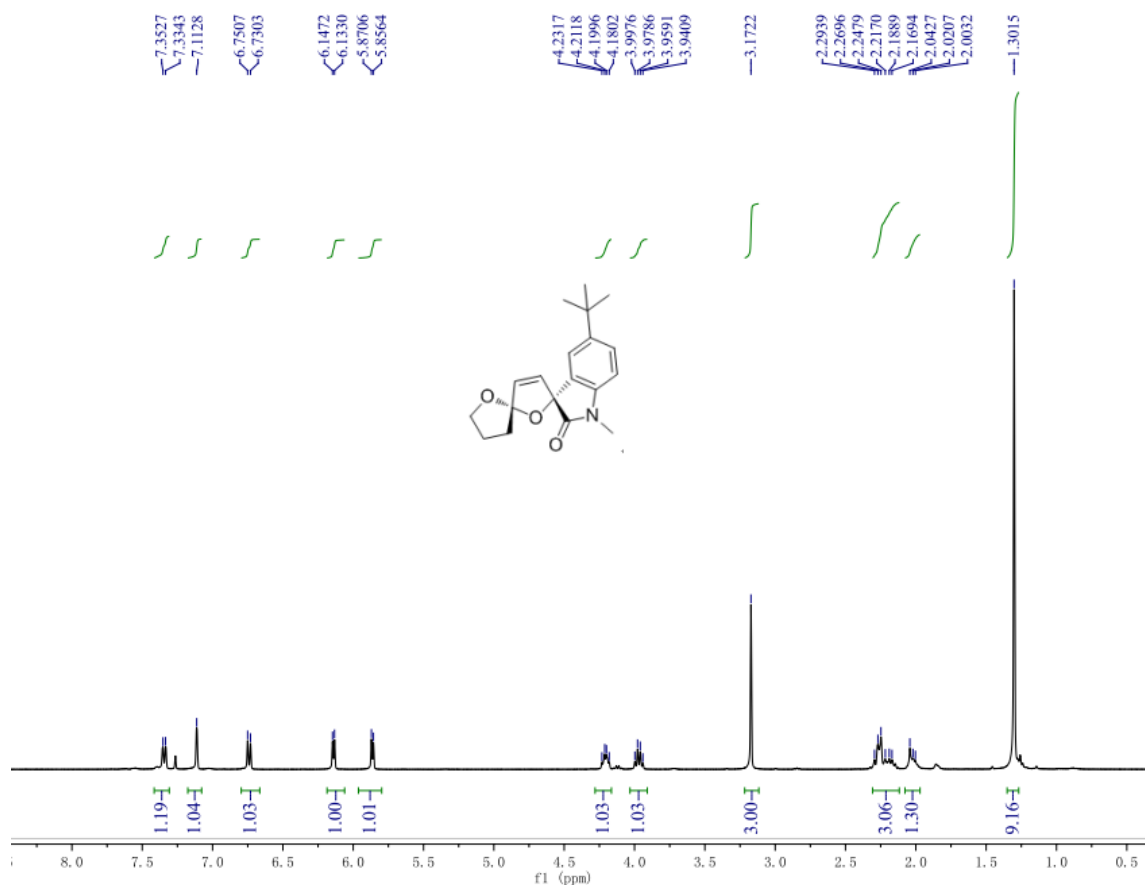

**<sup>1</sup>H NMR spectrum of 2h**

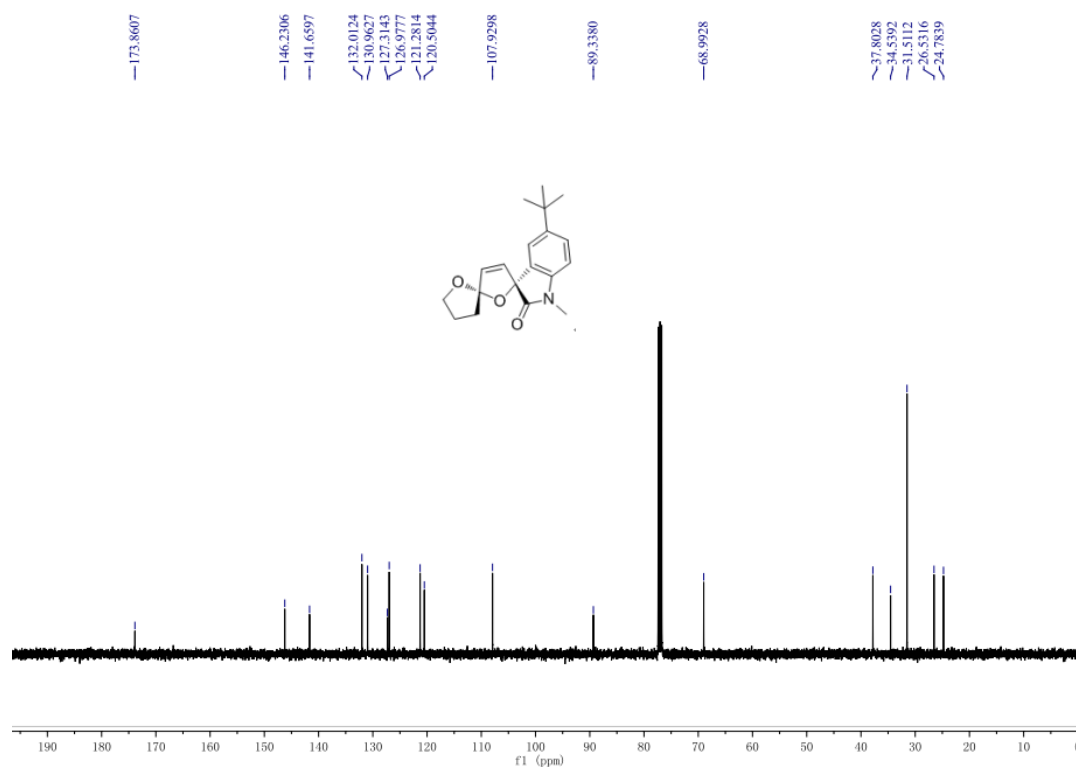

**<sup>13</sup>C NMR spectrum of 2h**

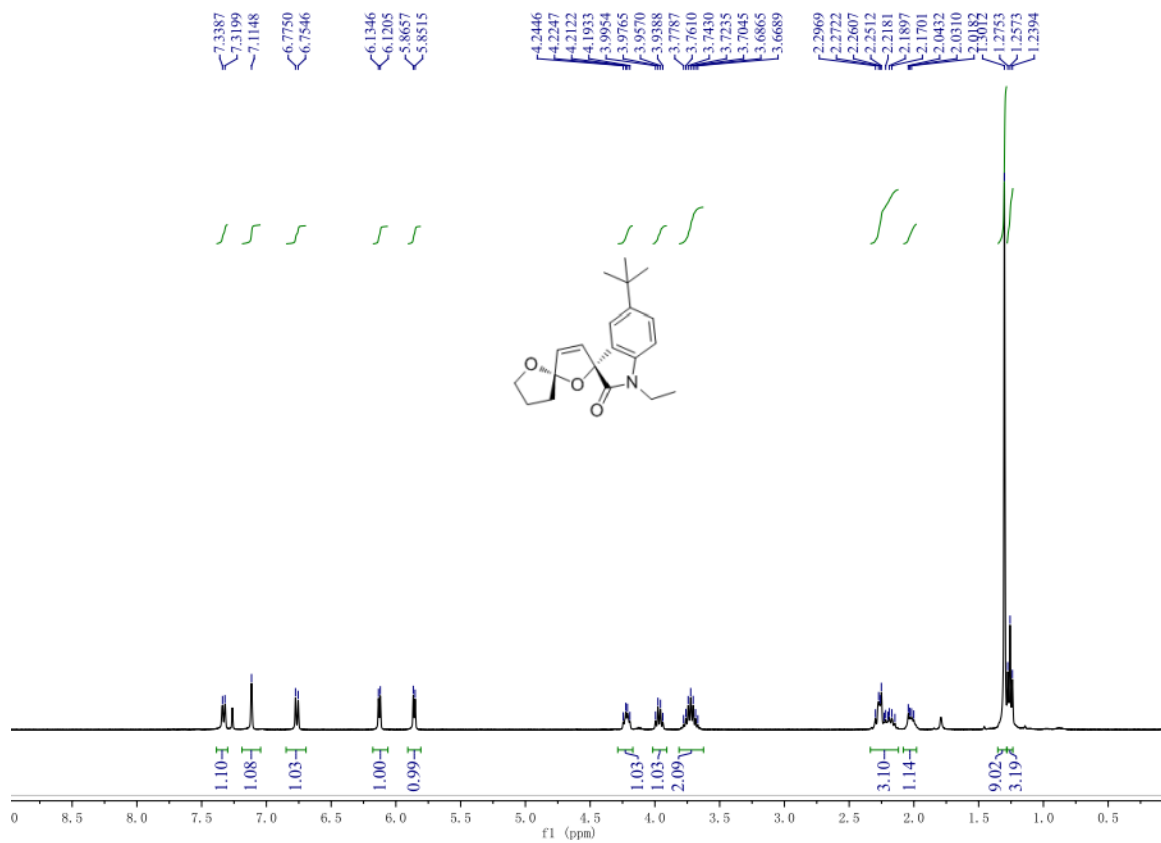

<sup>1</sup>H NMR spectrum of **2i**

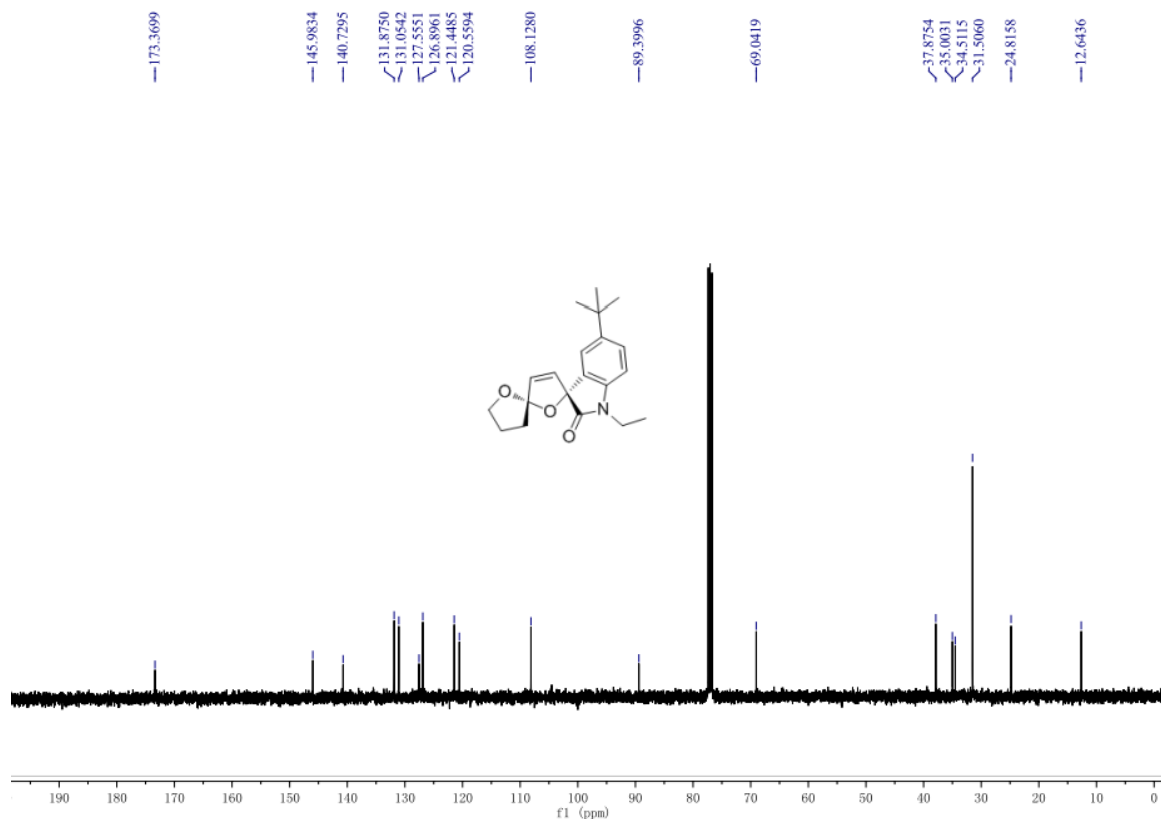

<sup>13</sup>C NMR spectrum of **2i**

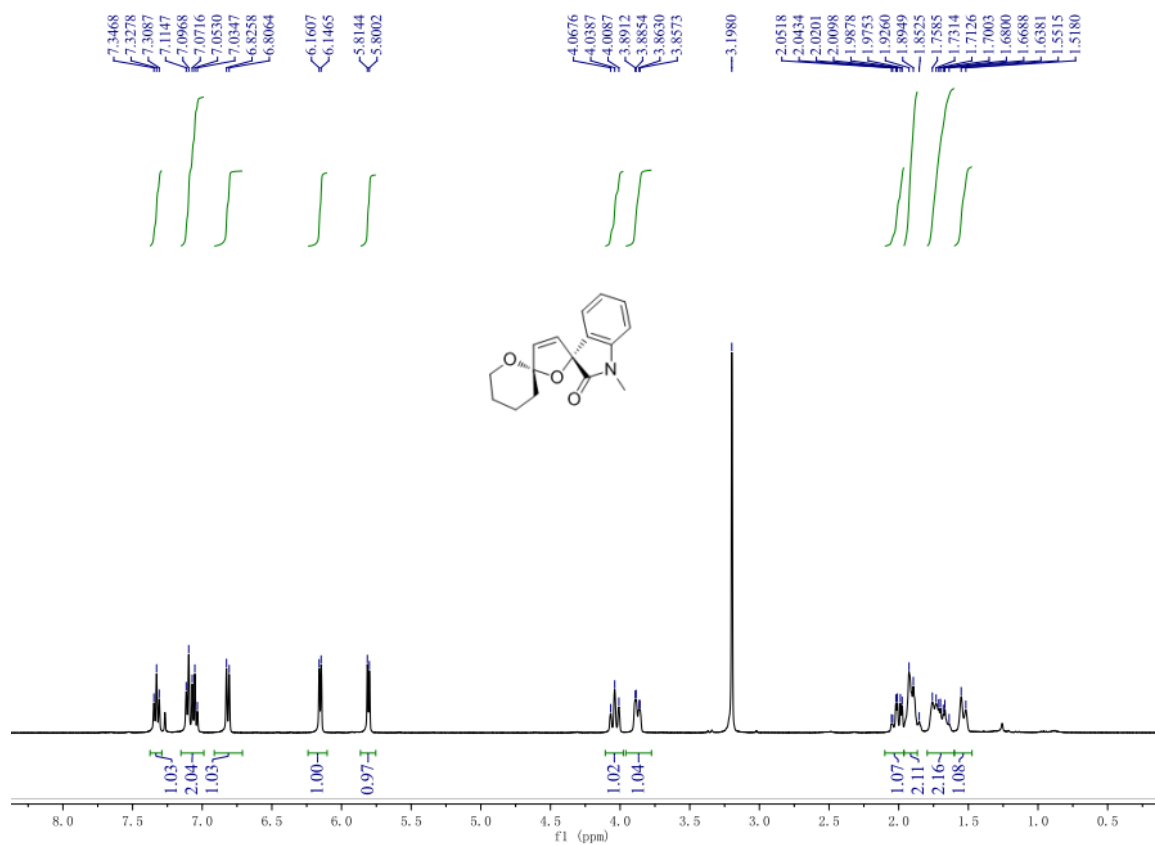

<sup>1</sup>H NMR spectrum of **2l**

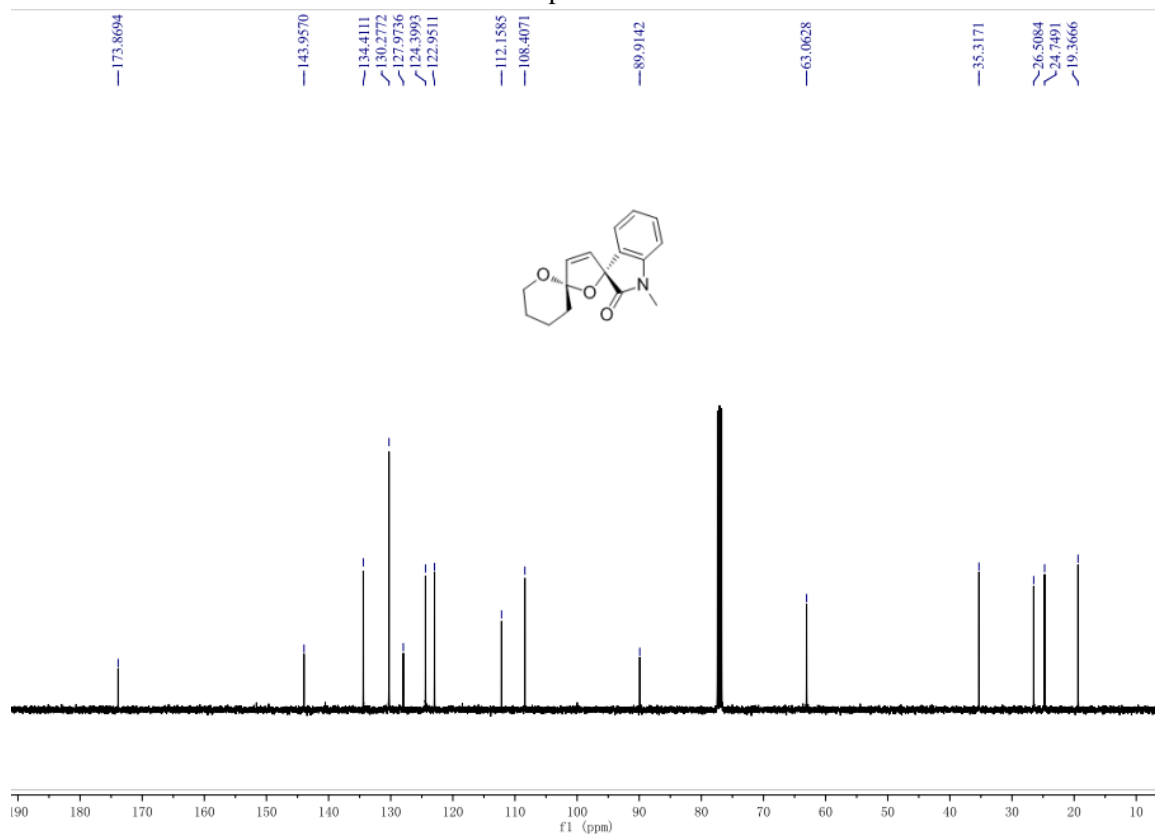

<sup>13</sup>C NMR spectrum of **2l**

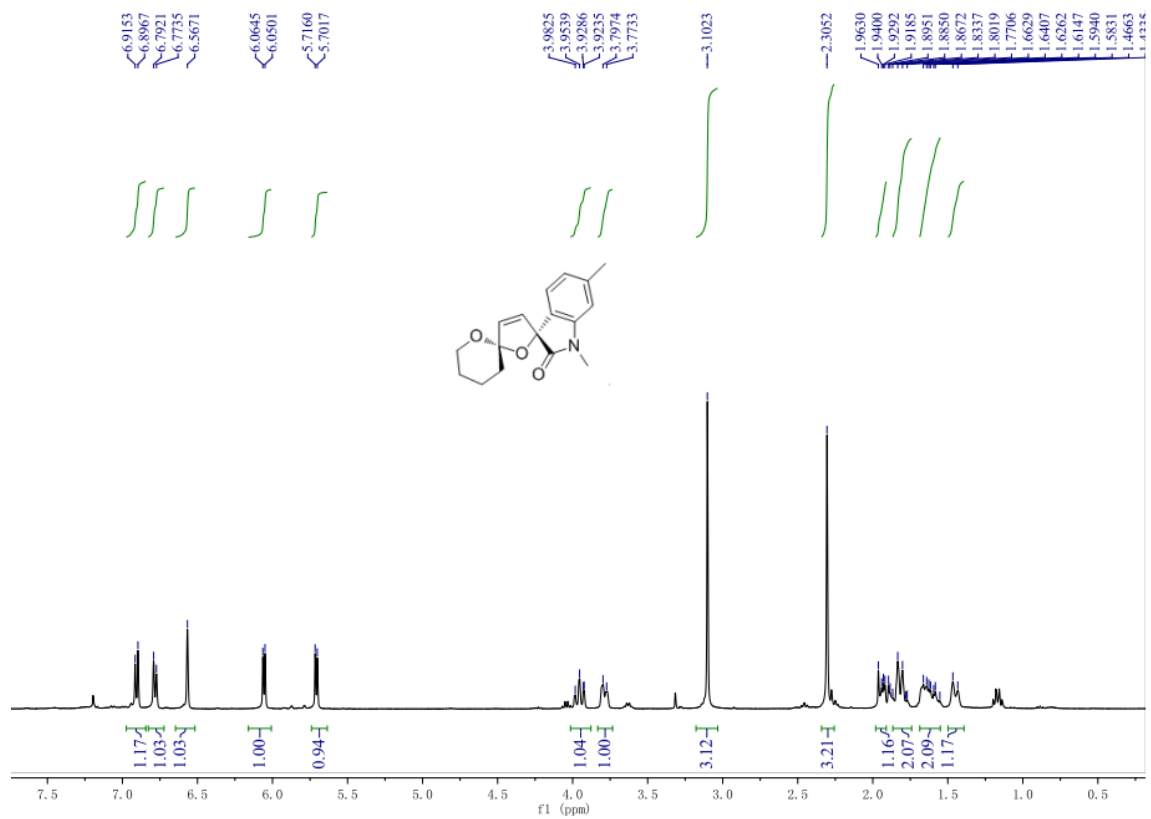

**<sup>1</sup>H NMR spectrum of 2m**

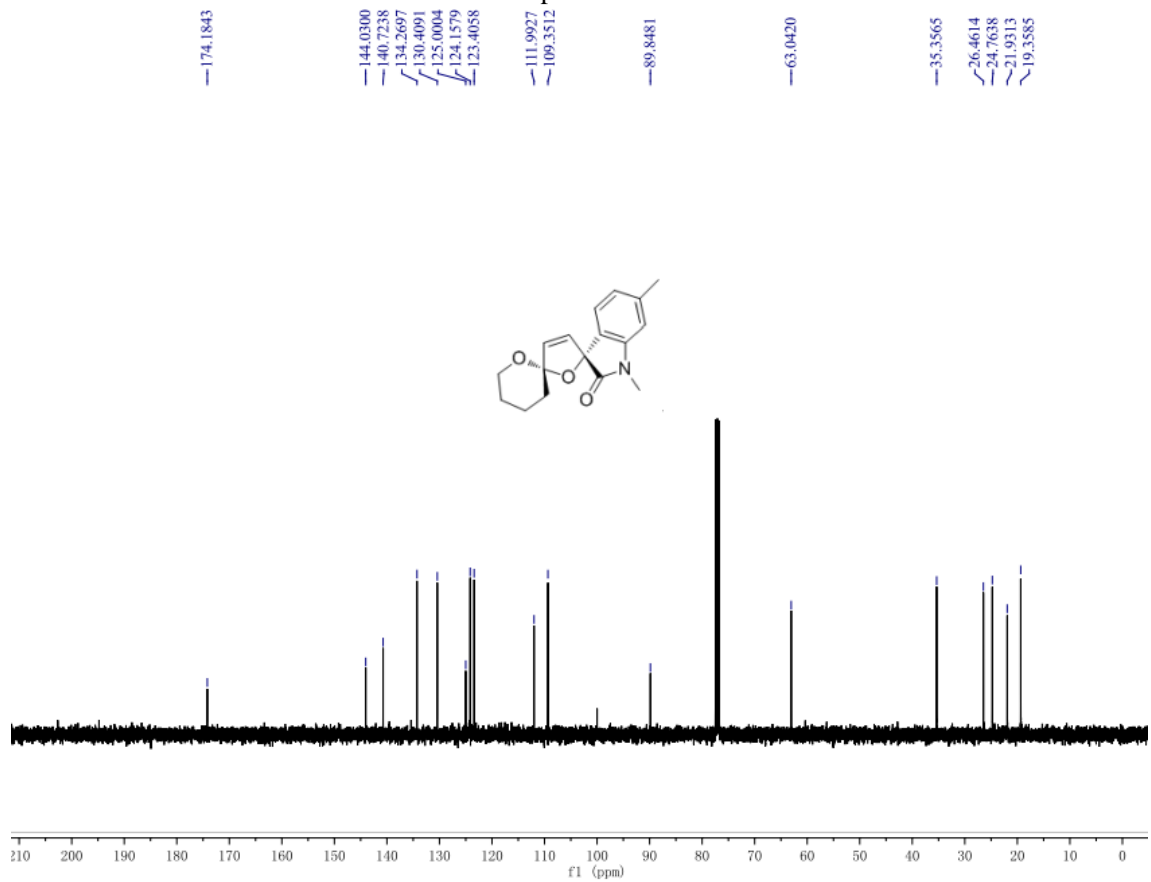

**<sup>13</sup>C NMR spectrum of 2m**



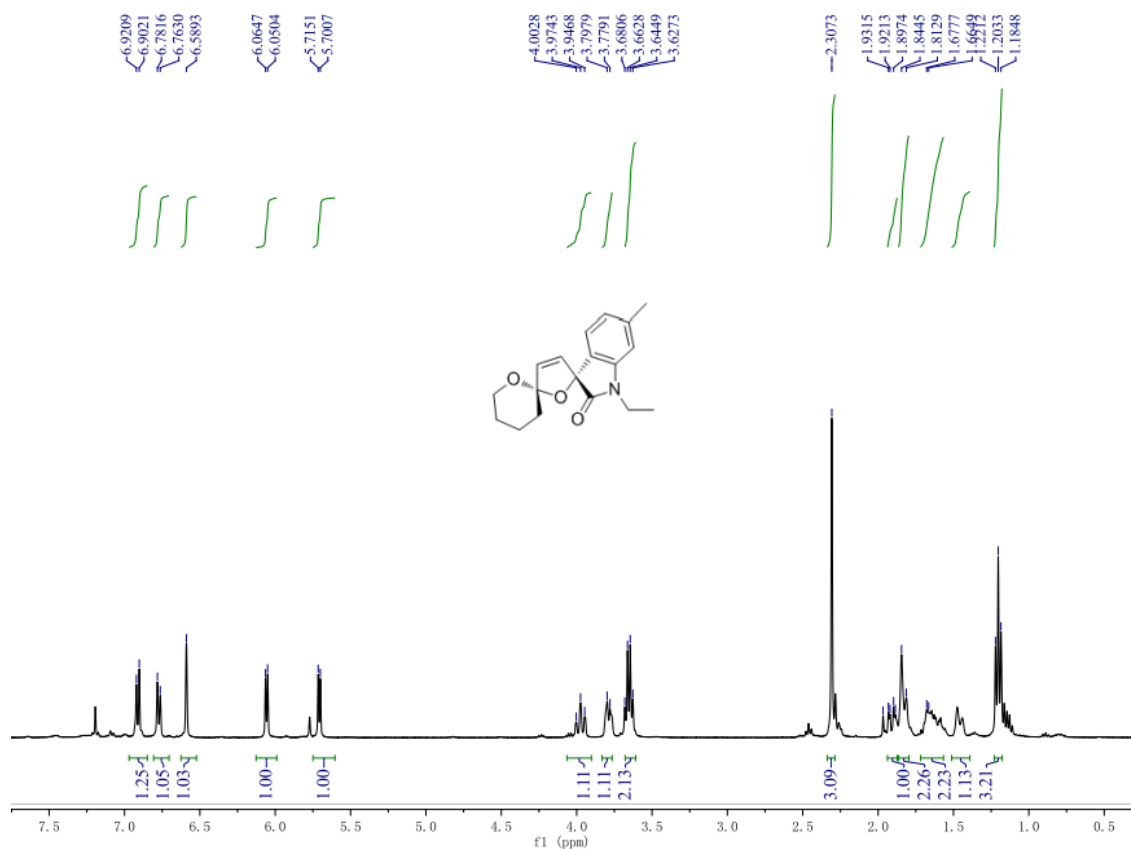

<sup>1</sup>H NMR spectrum of **2n**

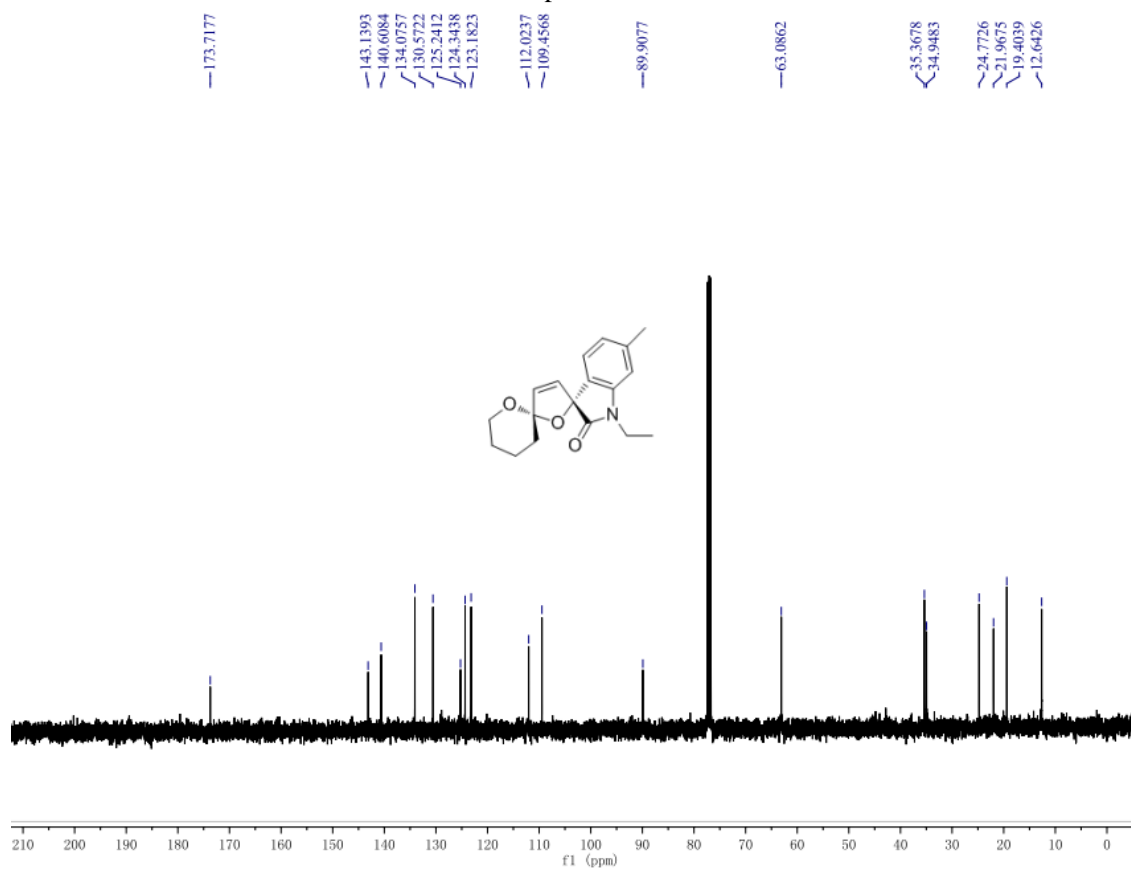

<sup>13</sup>C NMR spectrum of **2n**

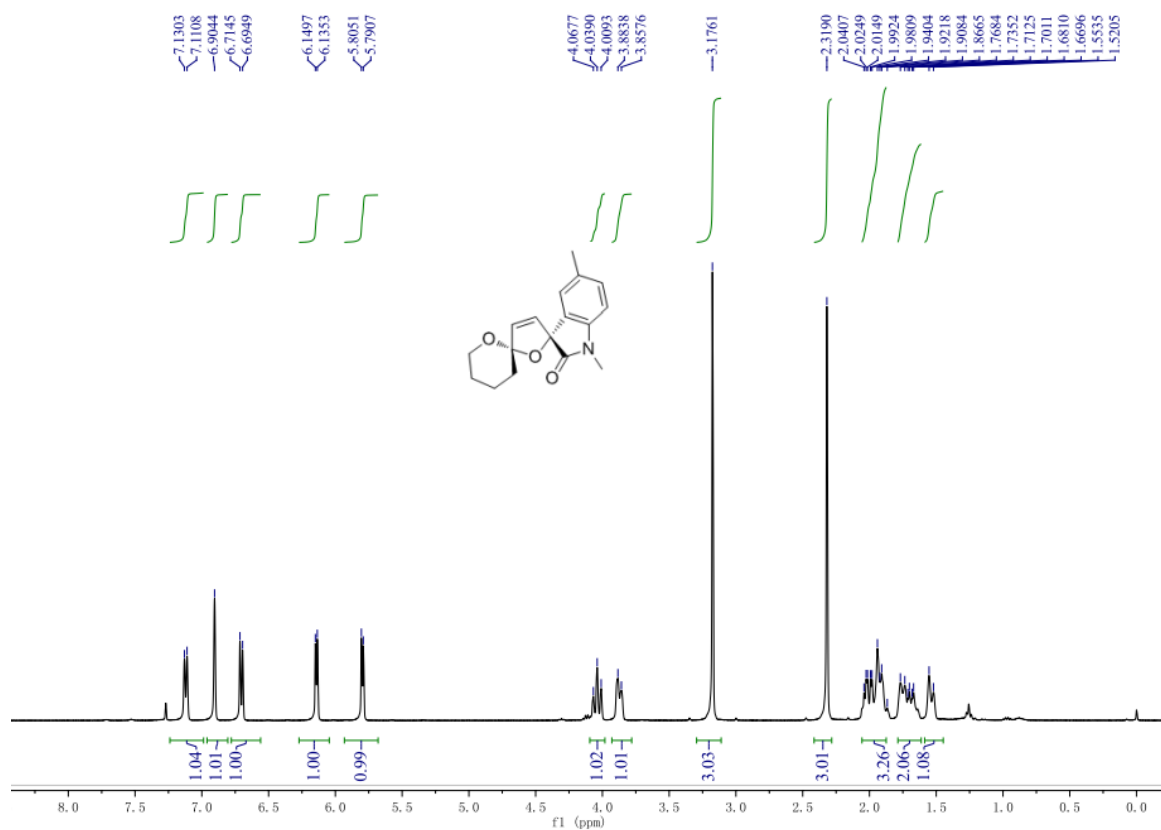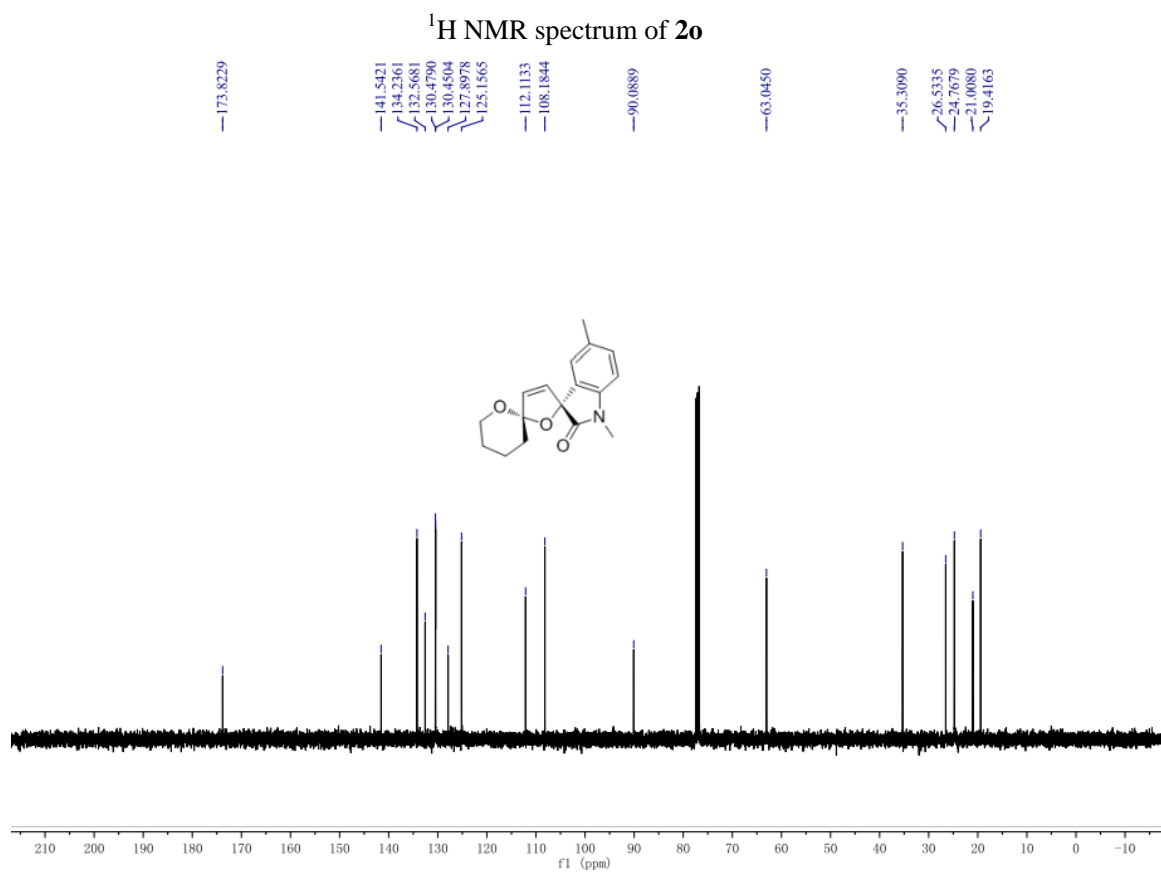

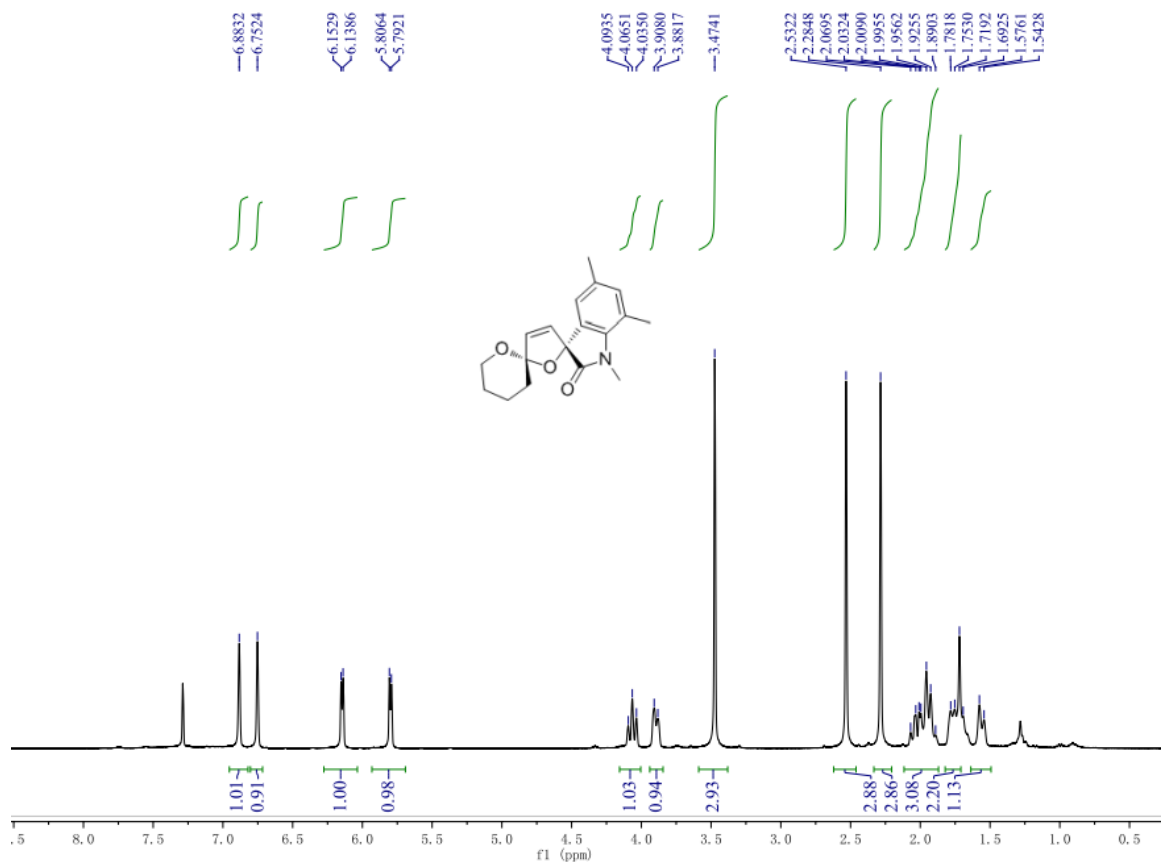

**<sup>1</sup>H NMR spectrum of 2p**

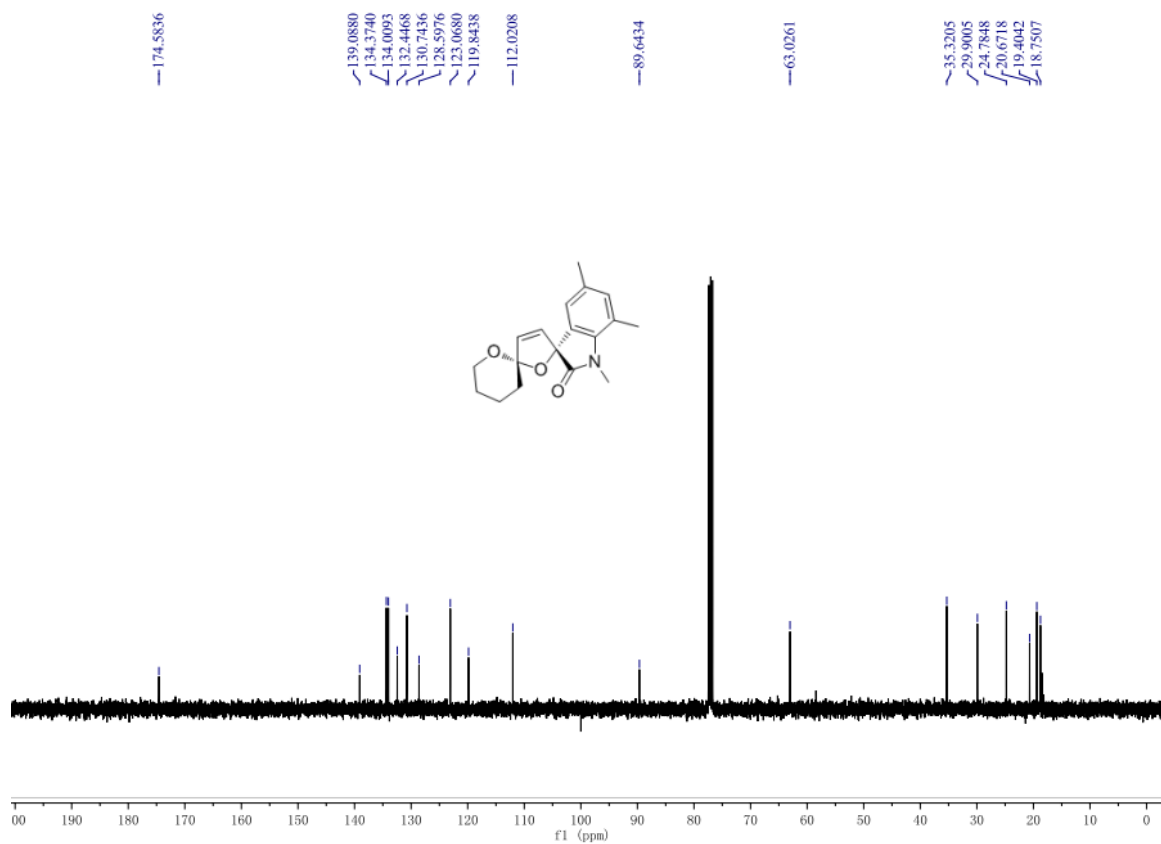

**<sup>13</sup>C NMR spectrum of 2p**

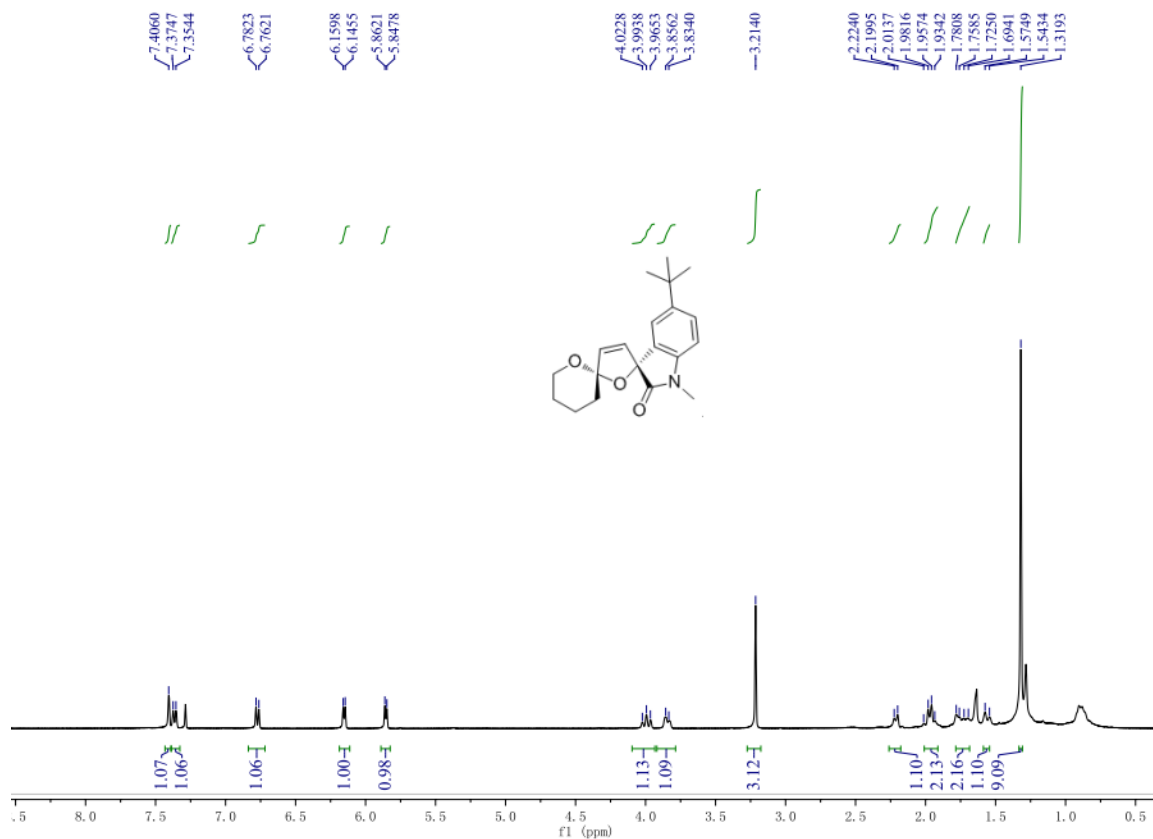

<sup>1</sup>H NMR spectrum of 2q

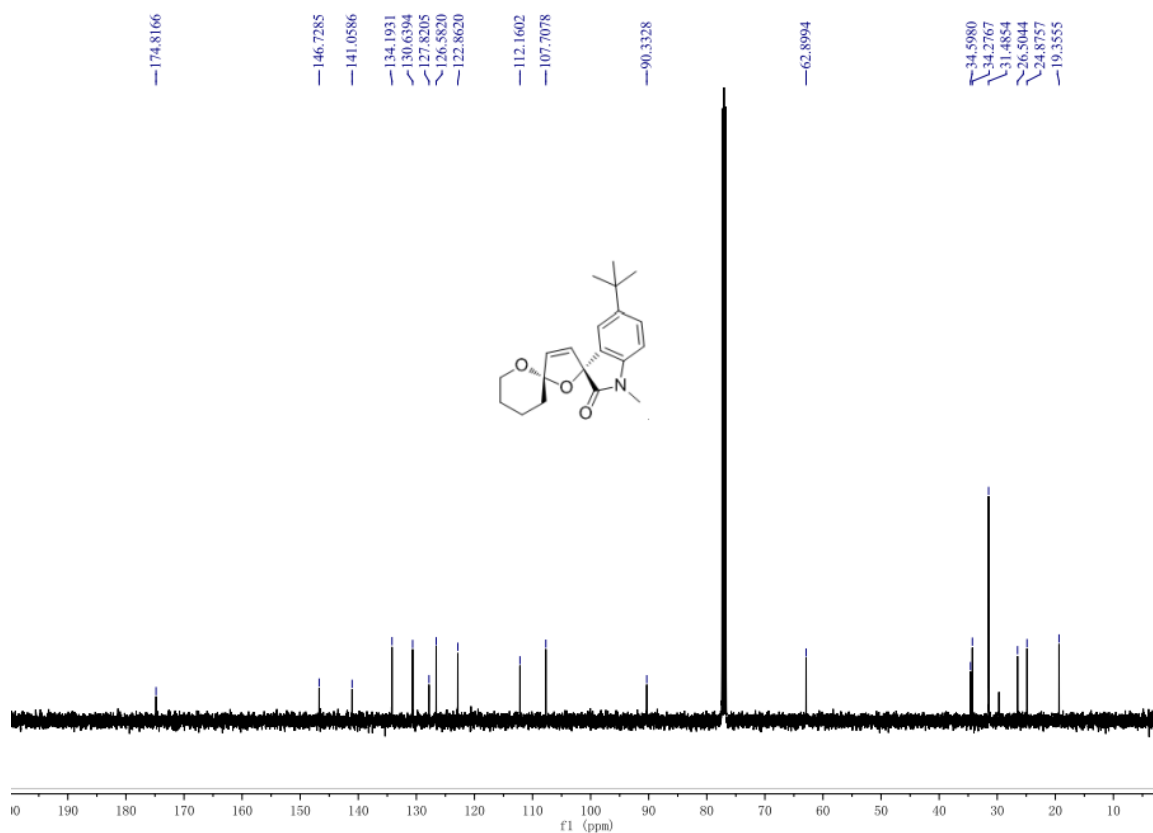

<sup>13</sup>C NMR spectrum of 2q

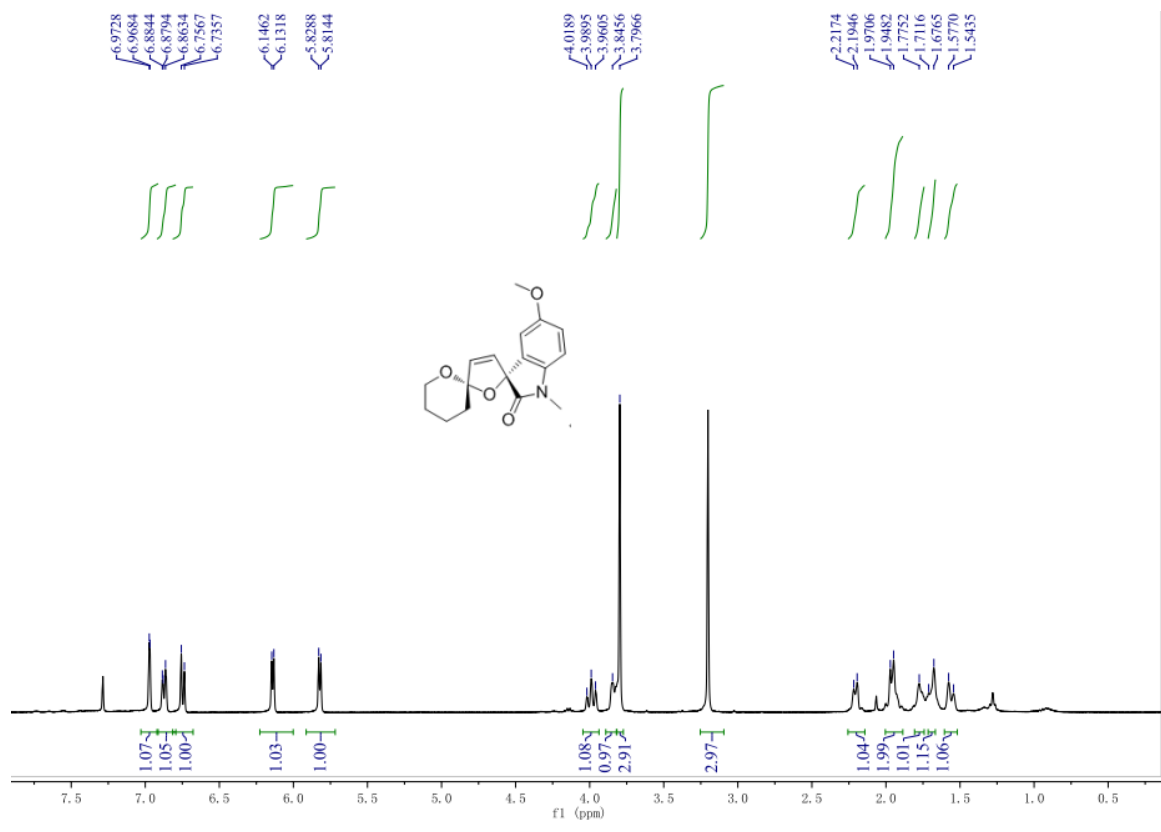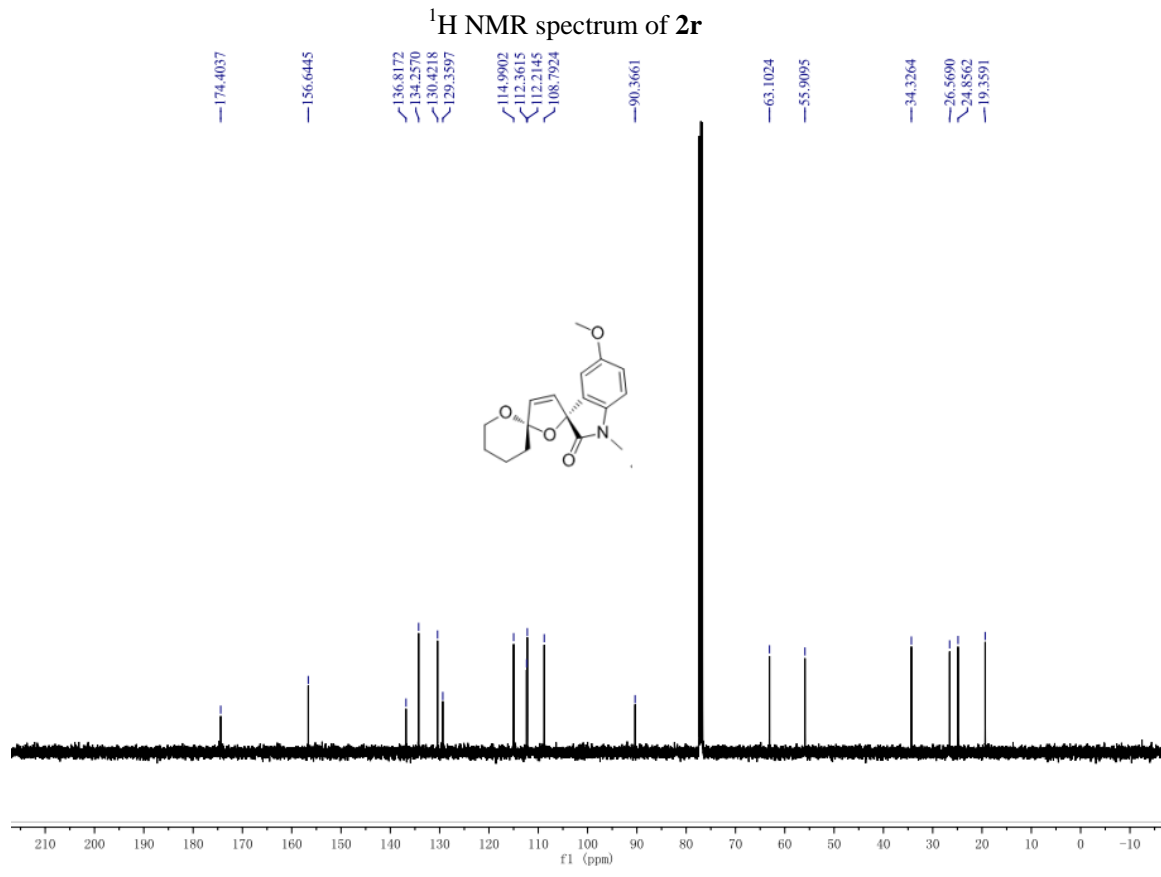

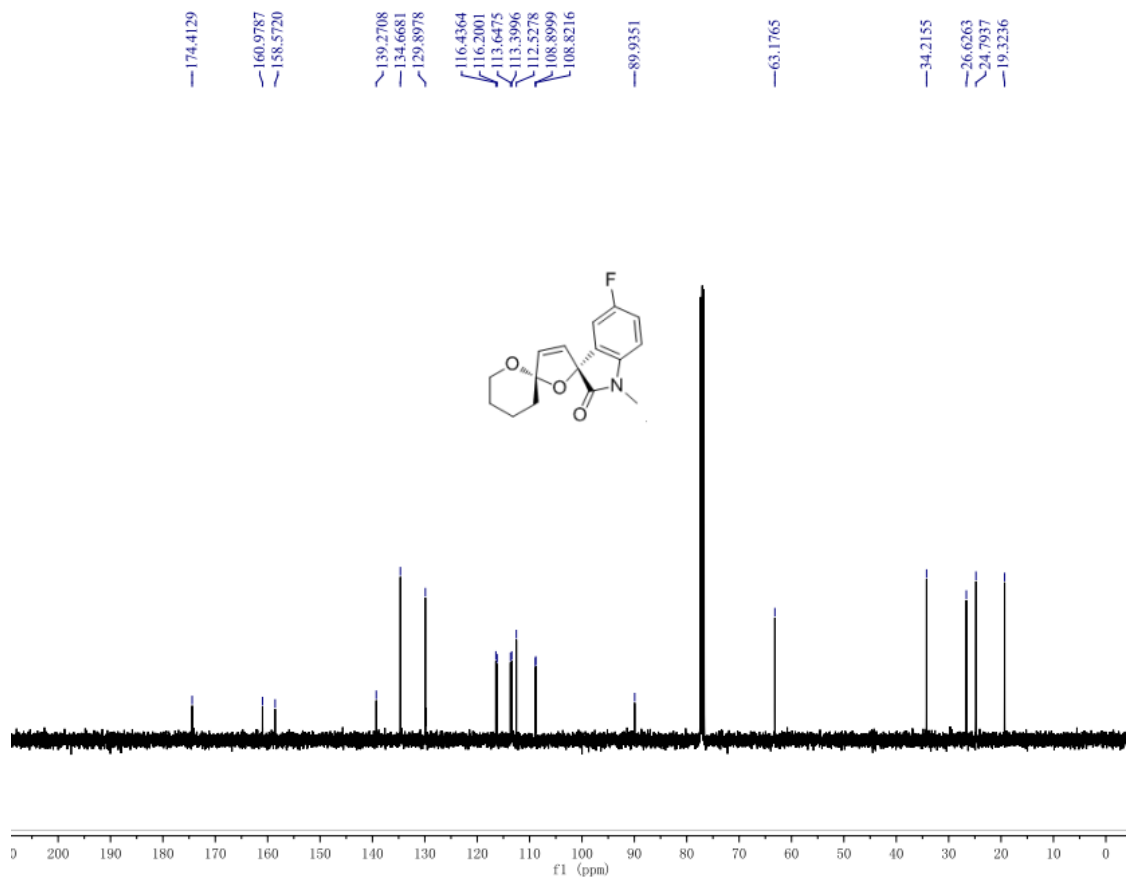

<sup>1</sup>H NMR spectrum of 2s

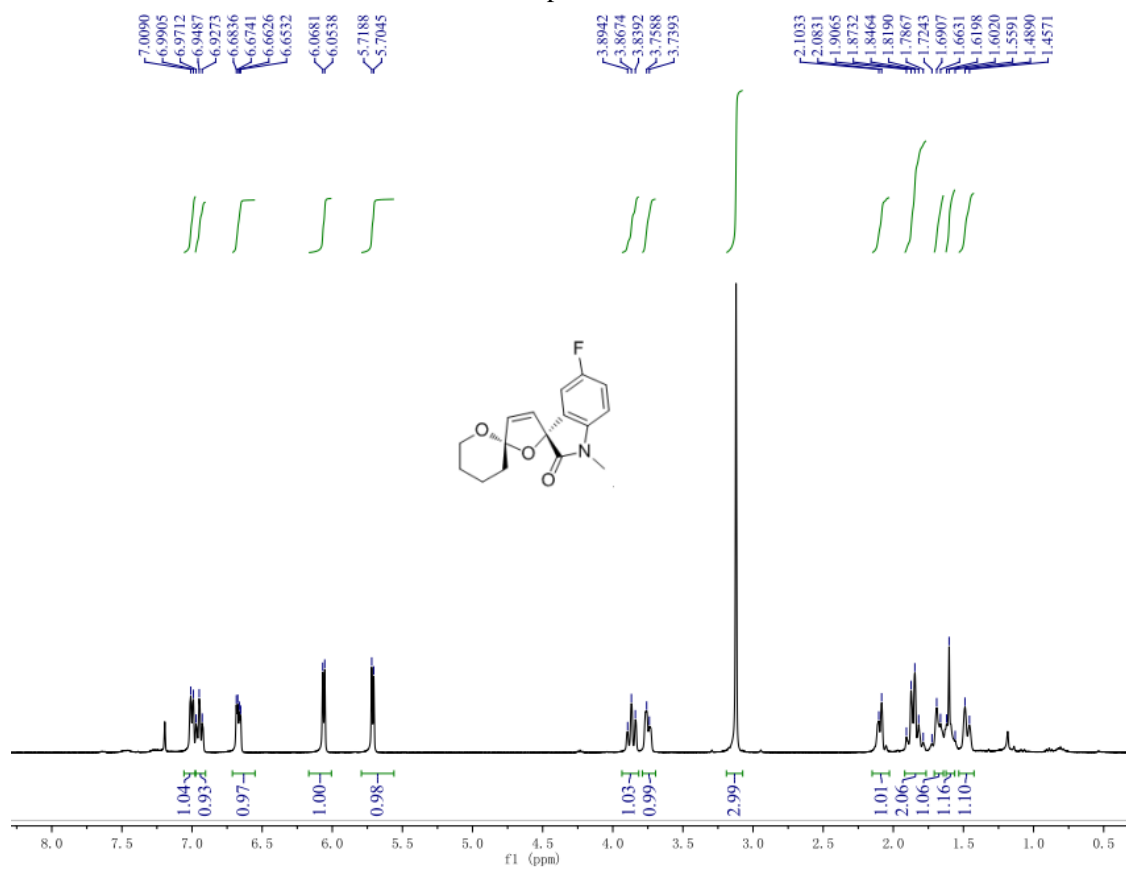

<sup>13</sup>C NMR spectrum of 2s

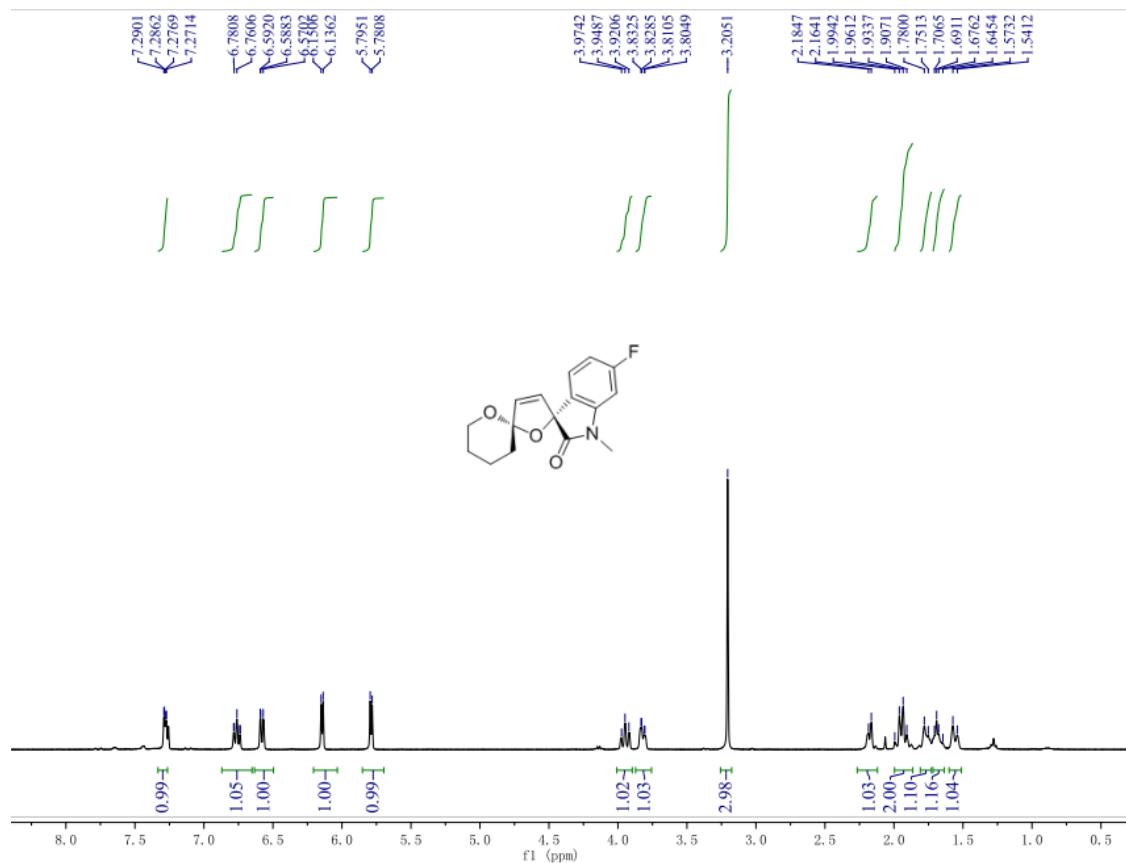

<sup>1</sup>H NMR spectrum of 2t

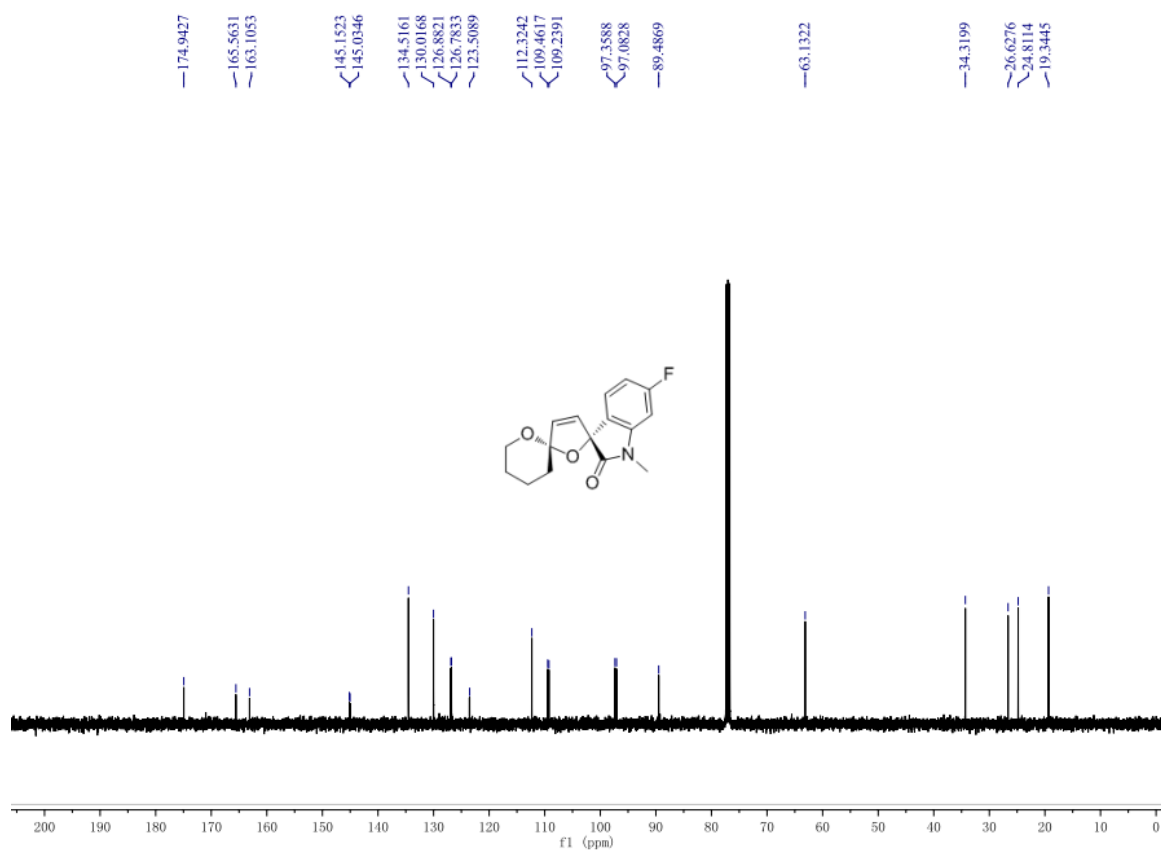

<sup>13</sup>C NMR spectrum of 2t

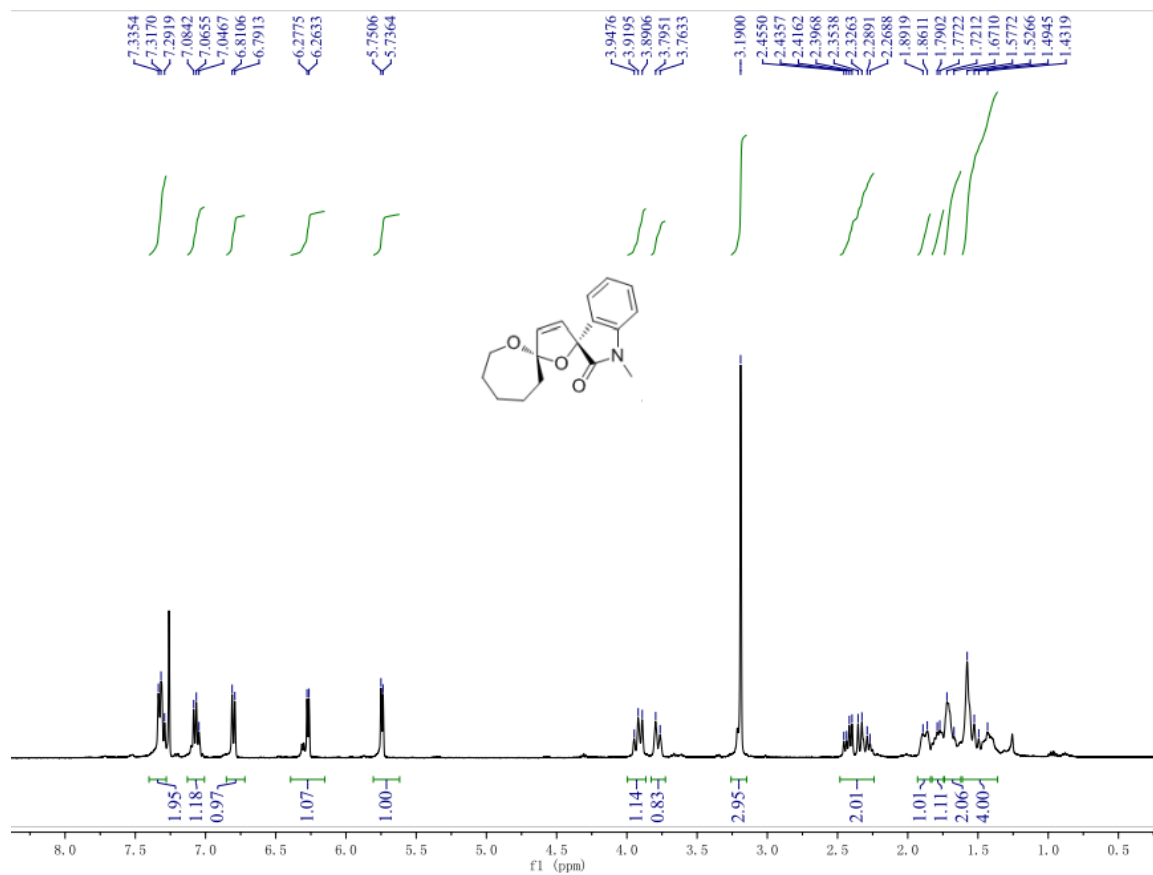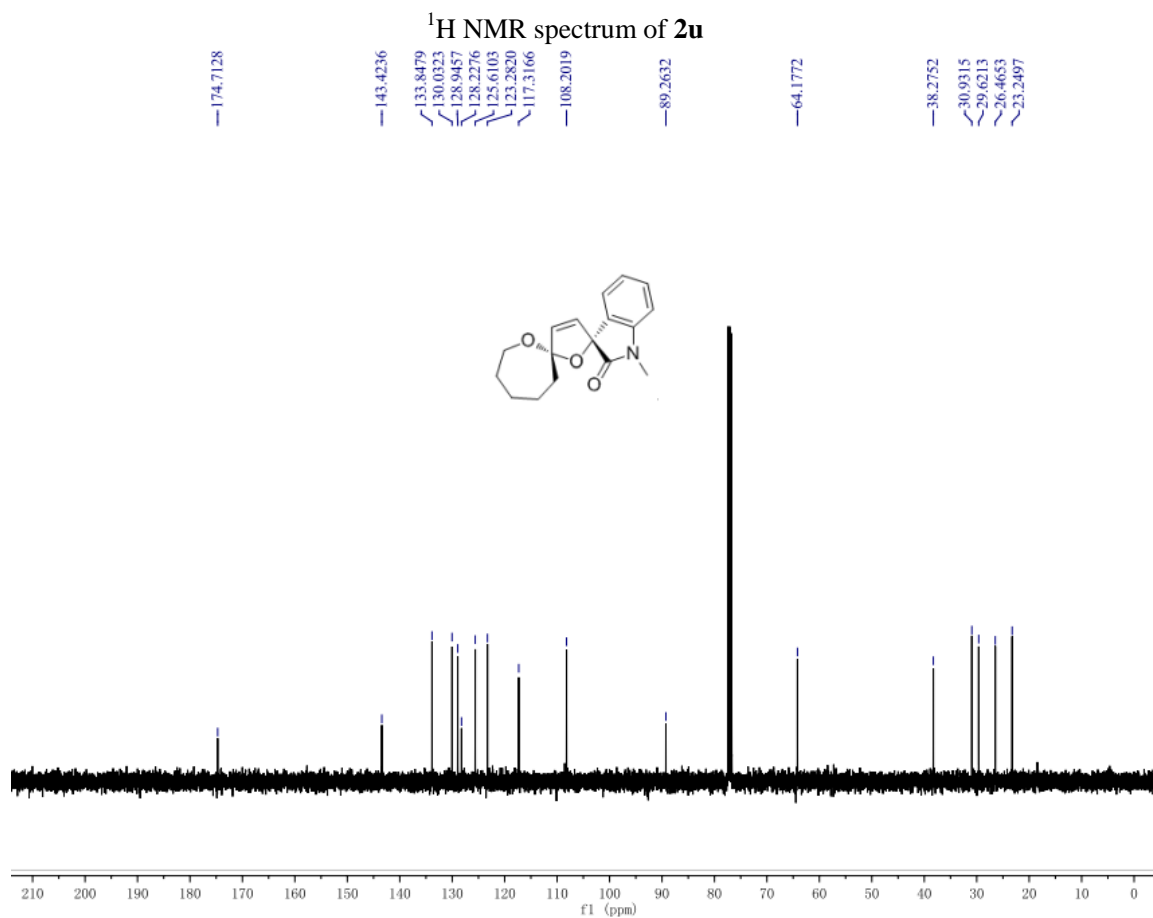



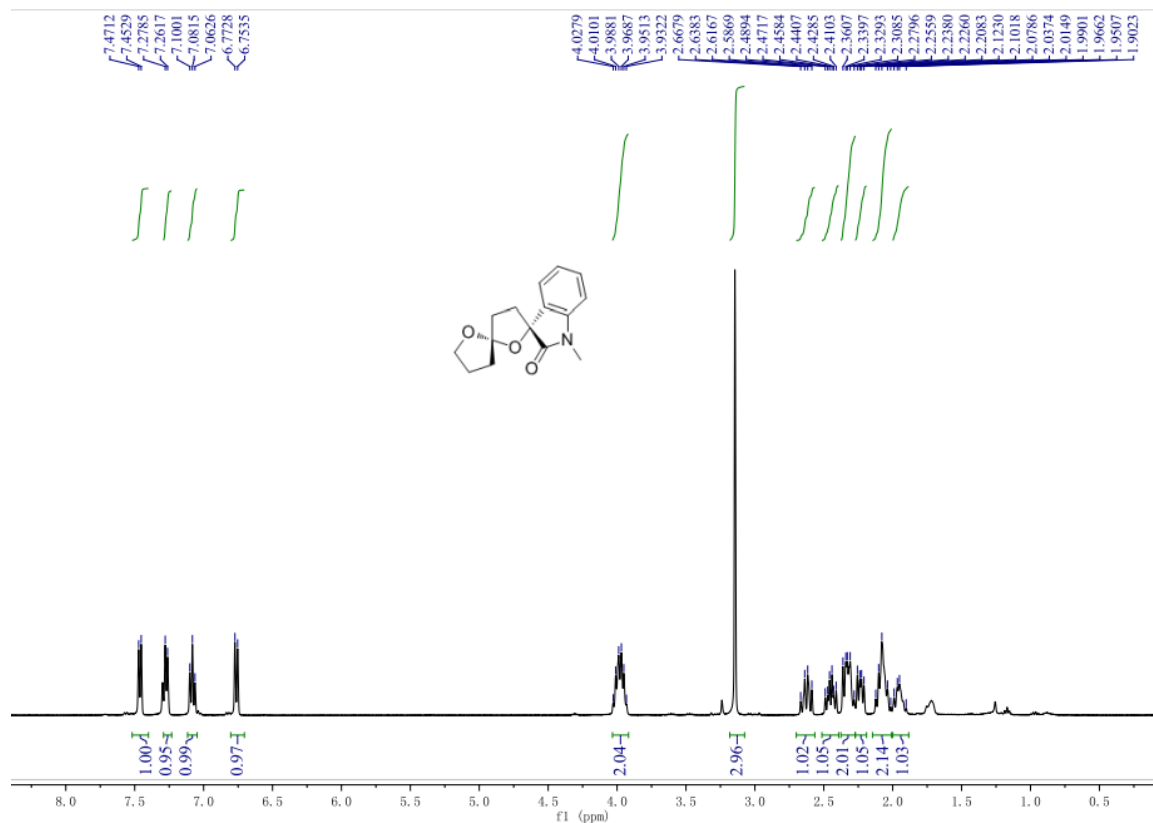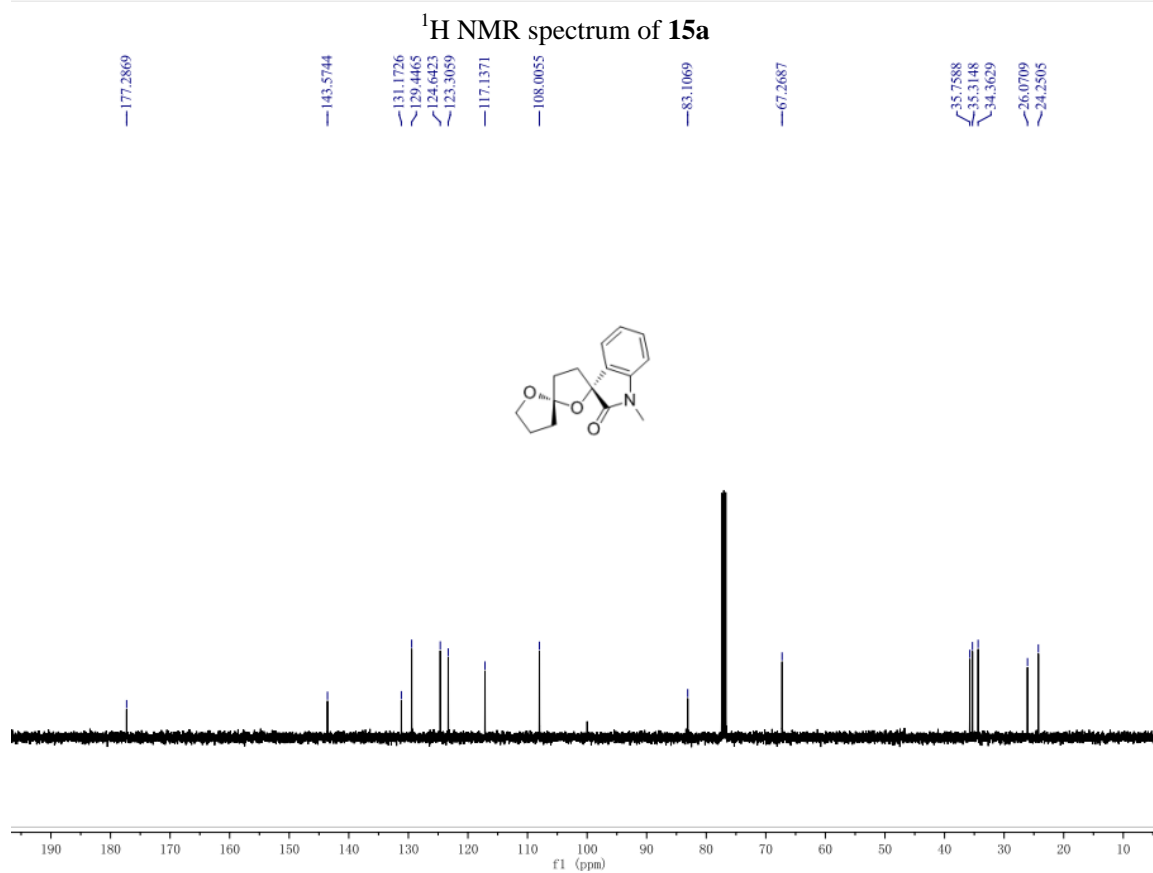

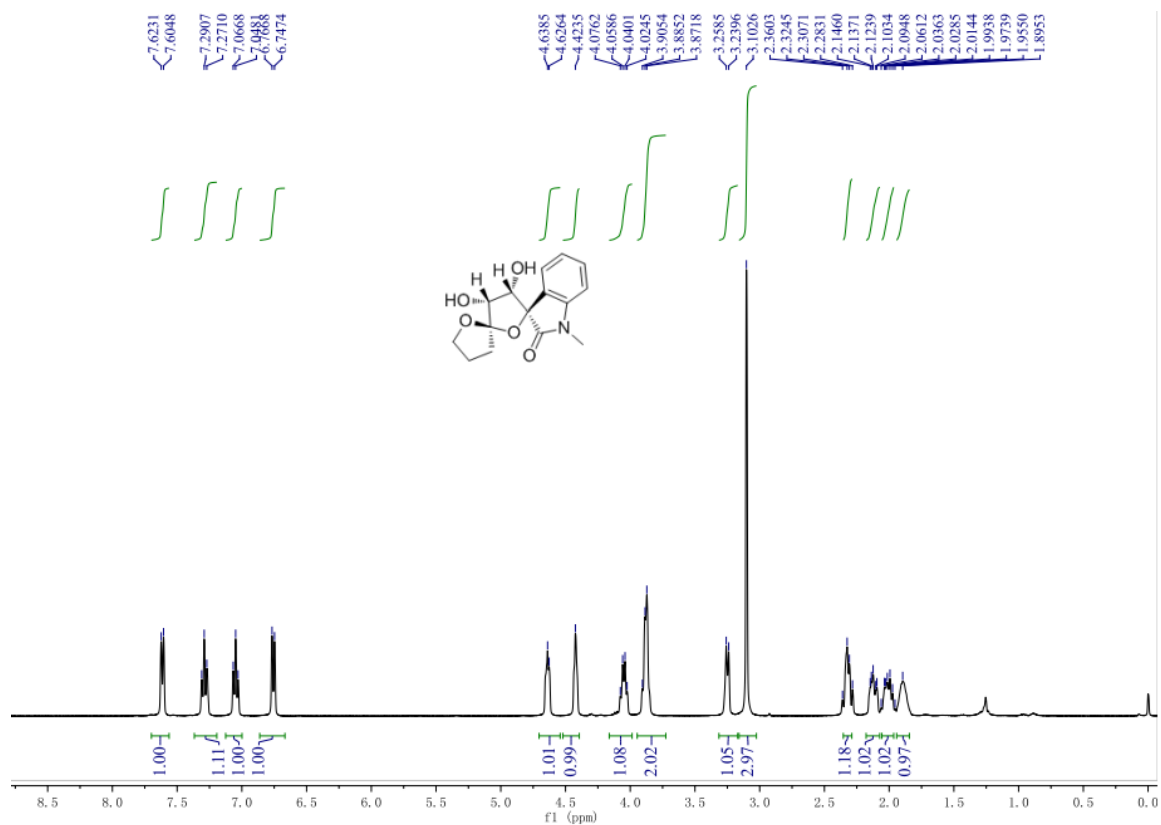

**<sup>1</sup>H NMR spectrum of 16a**

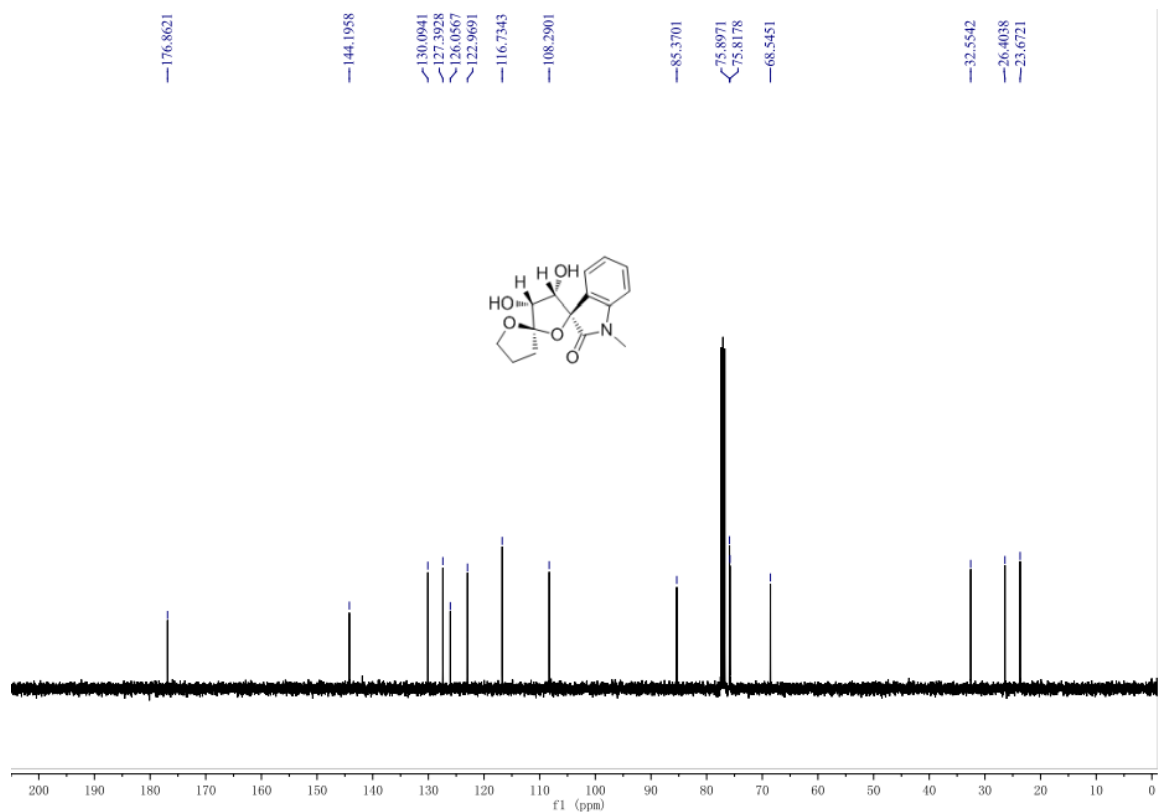

**<sup>13</sup>C NMR spectrum of 16a**

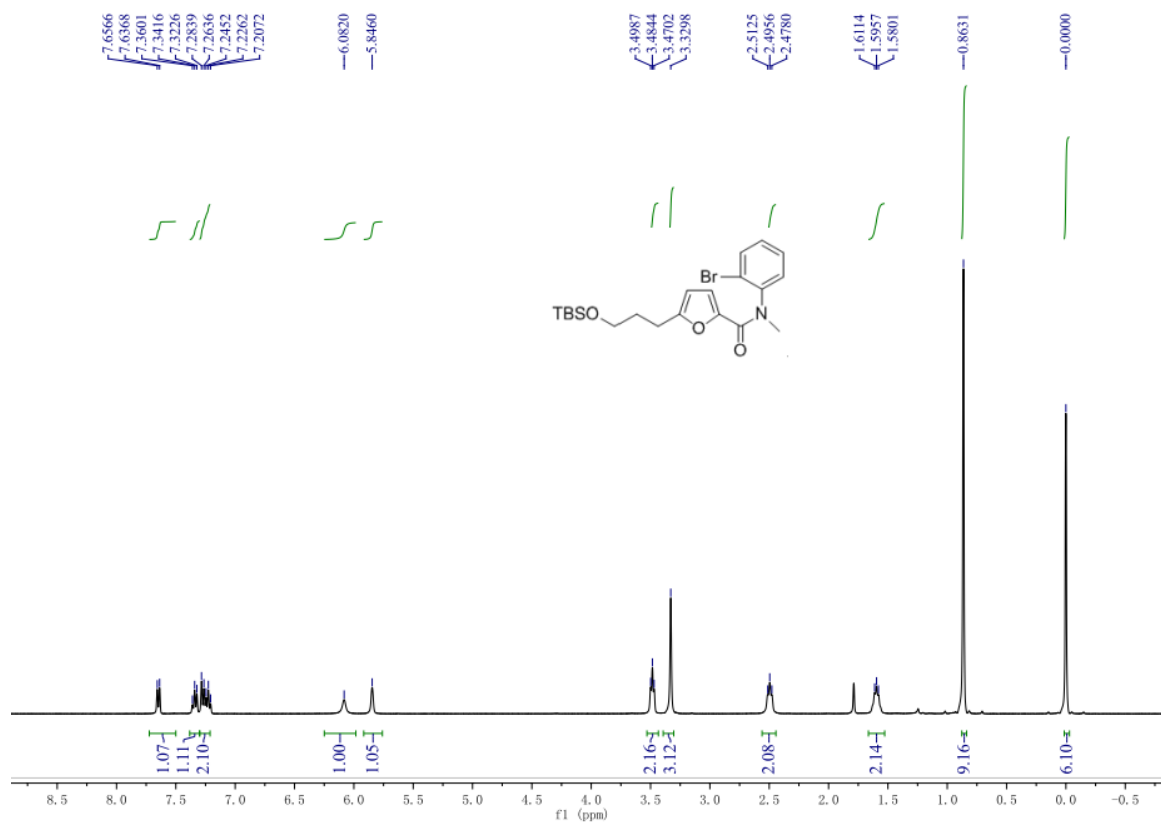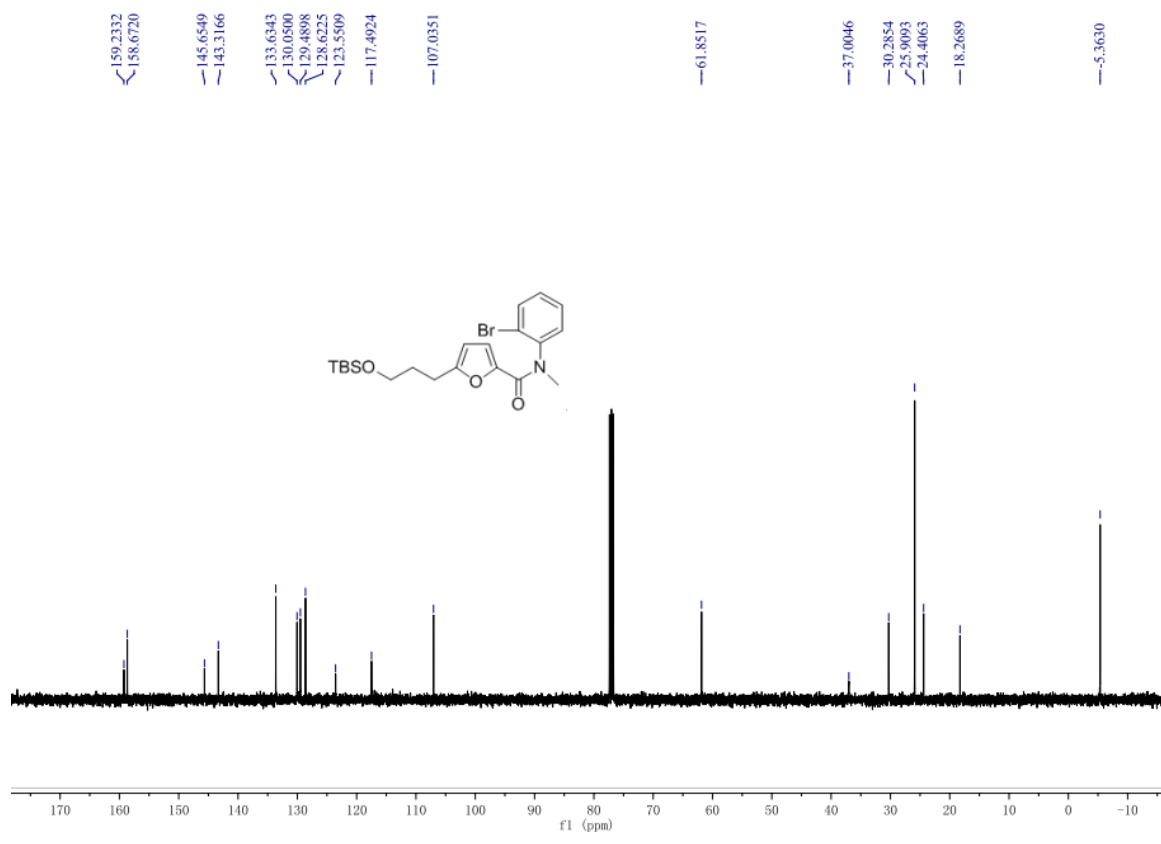

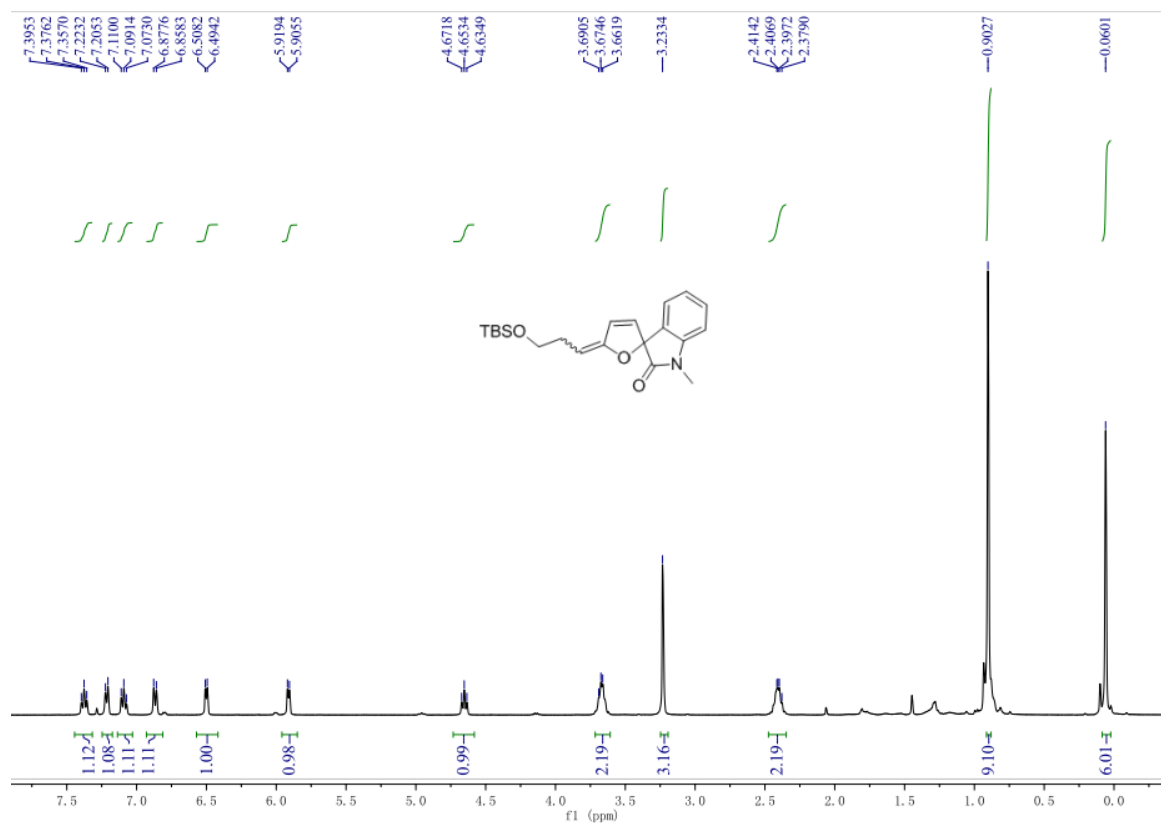

<sup>1</sup>H NMR spectrum of 18a

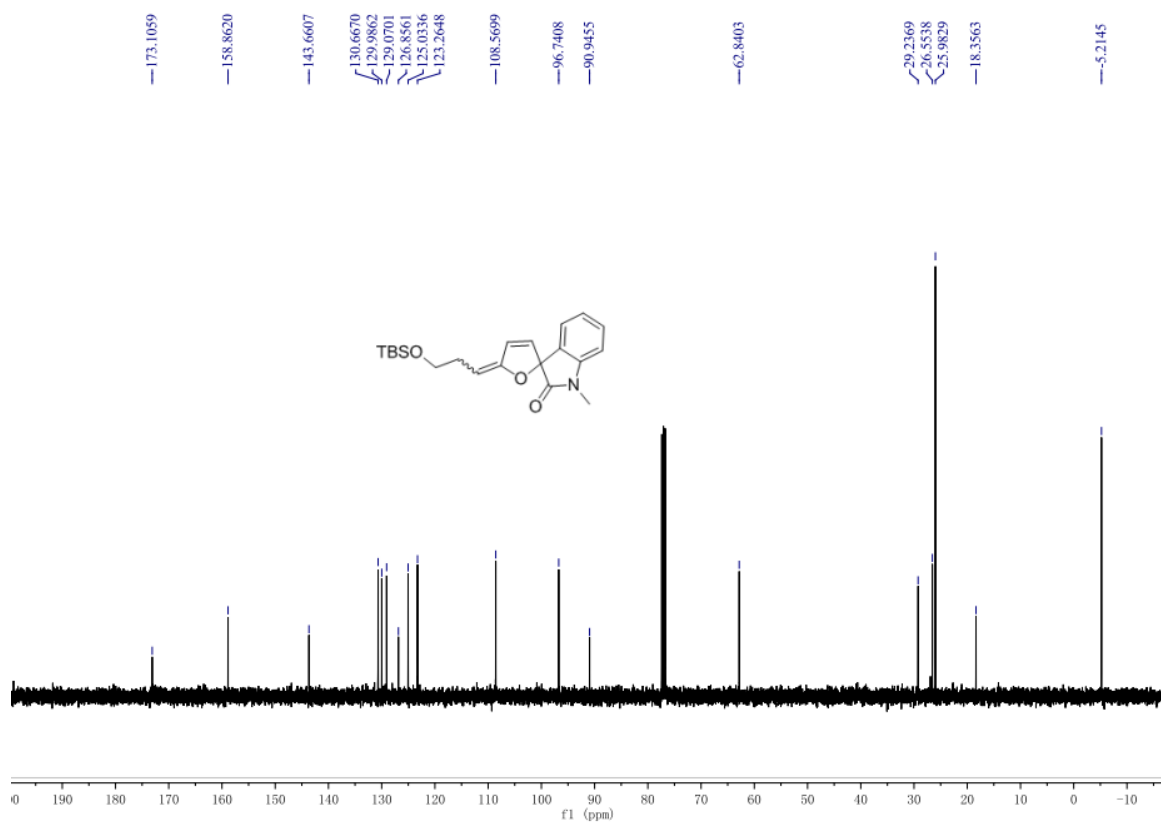

<sup>13</sup>C NMR spectrum of 18a

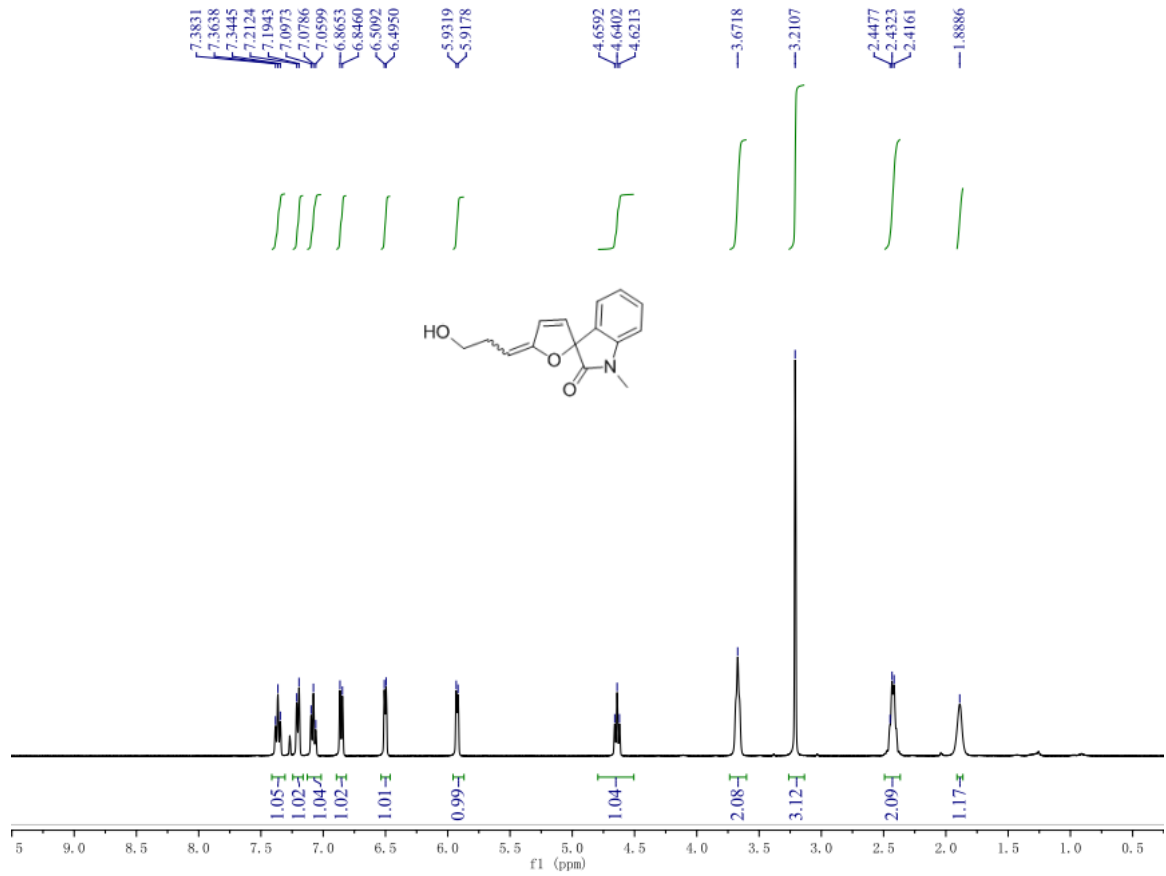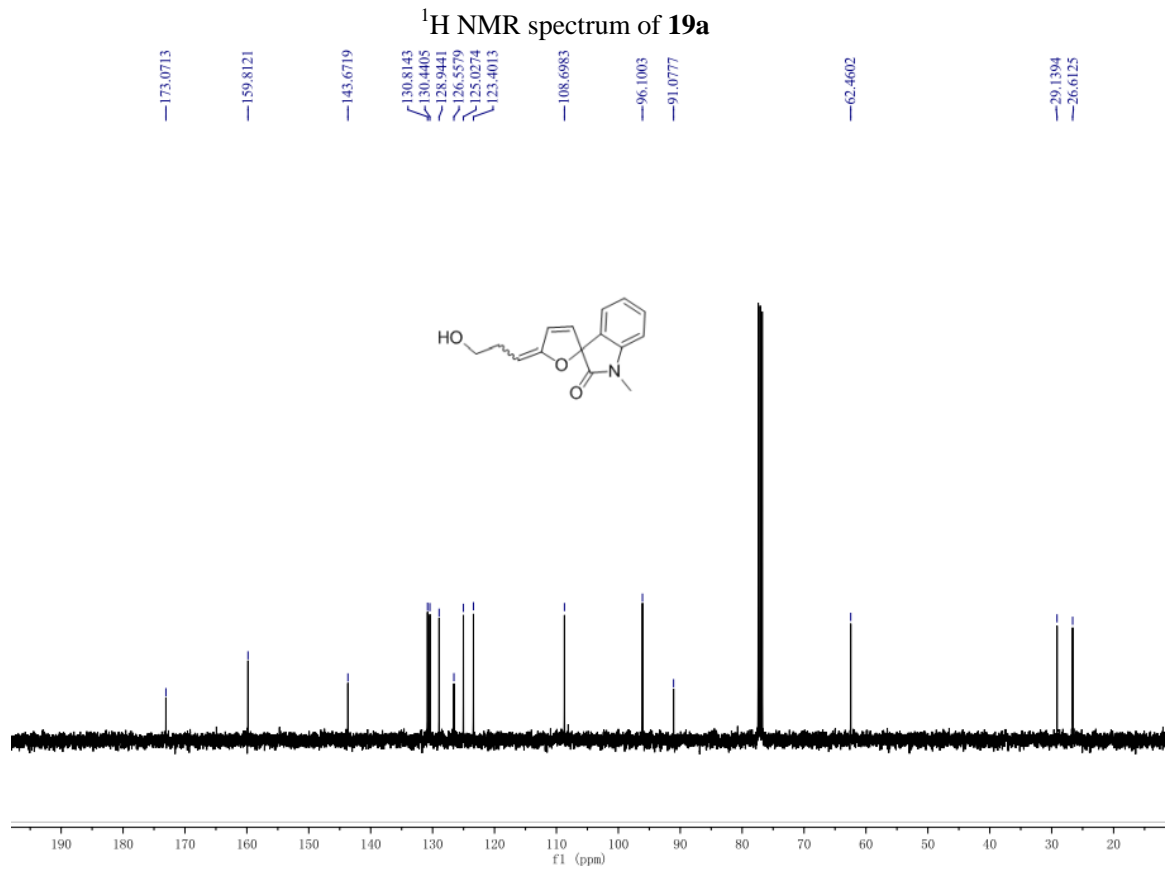

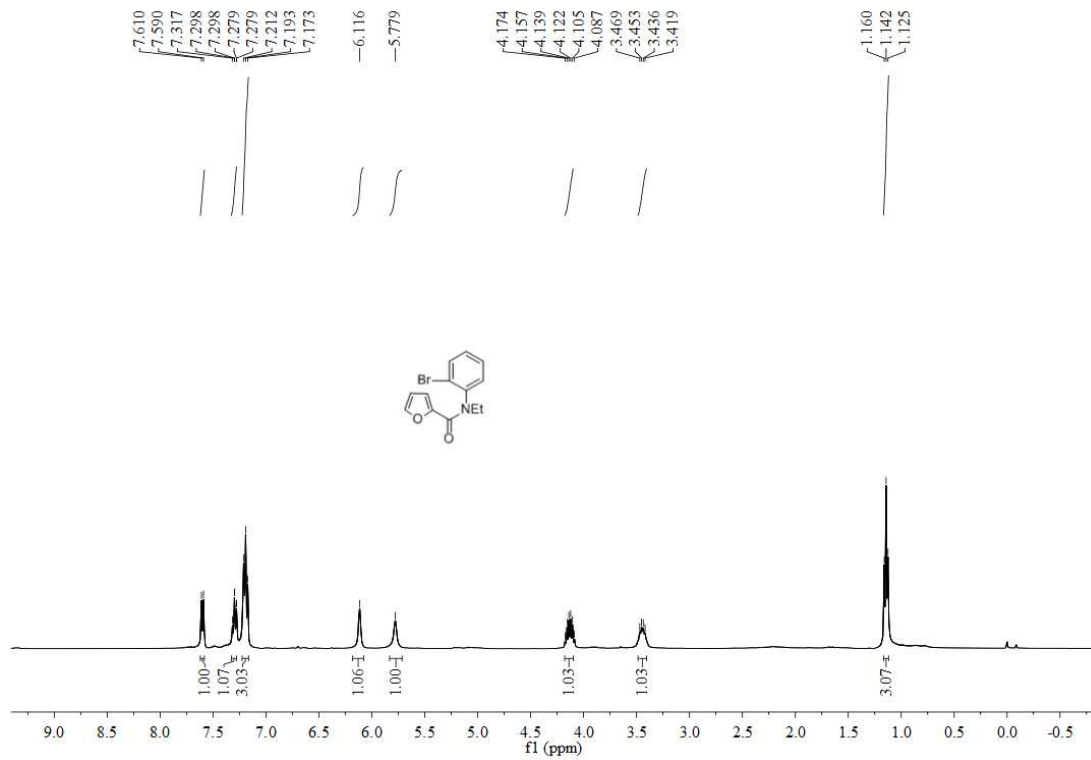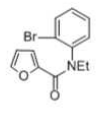

<sup>1</sup>H NMR spectrum of **12a**

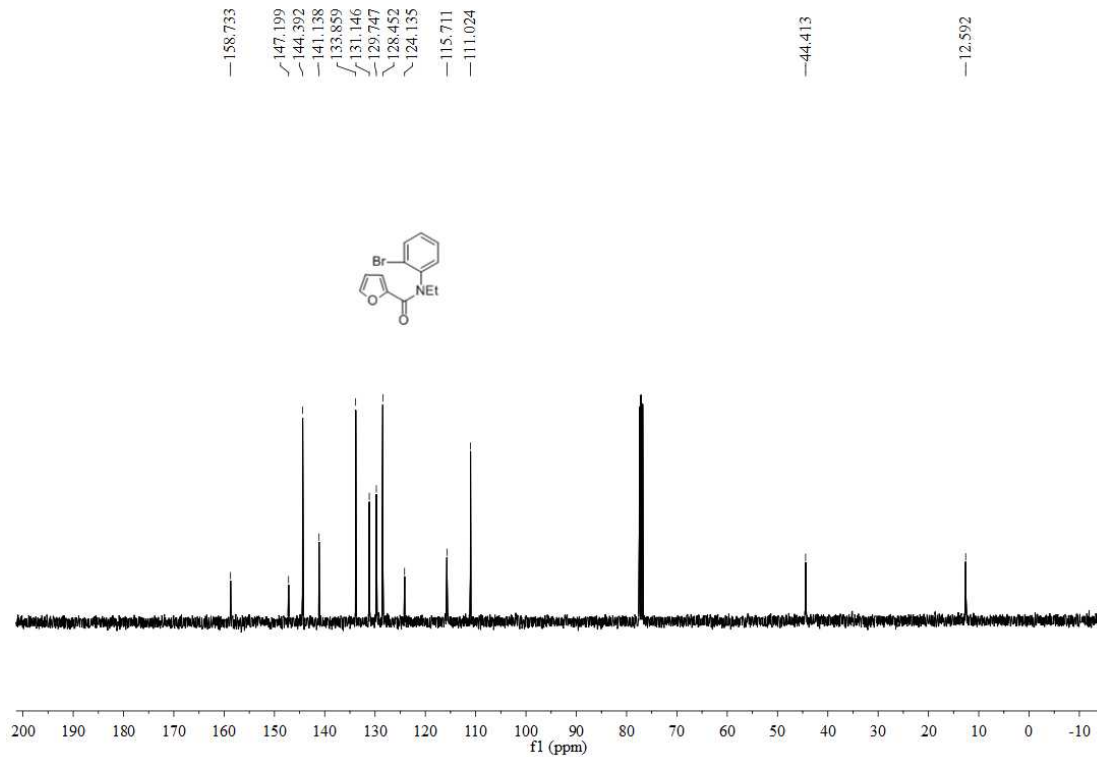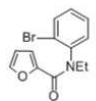

<sup>13</sup>C NMR spectrum of **12a**

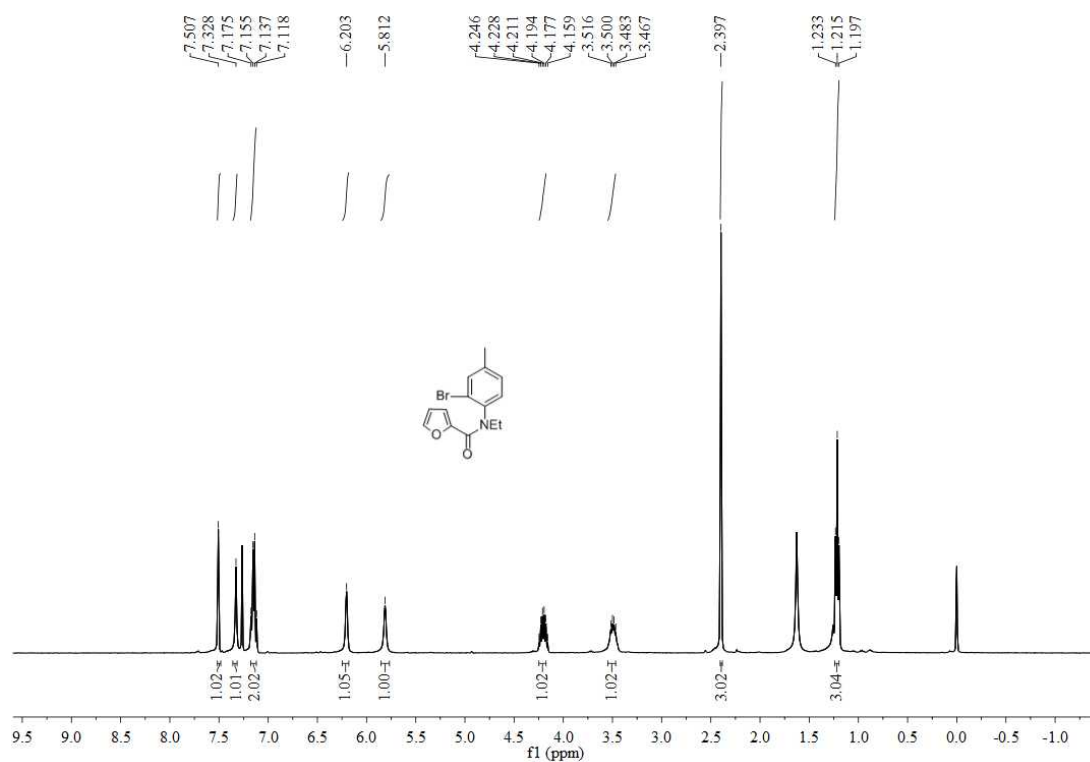

<sup>1</sup>H NMR spectrum of **12b**

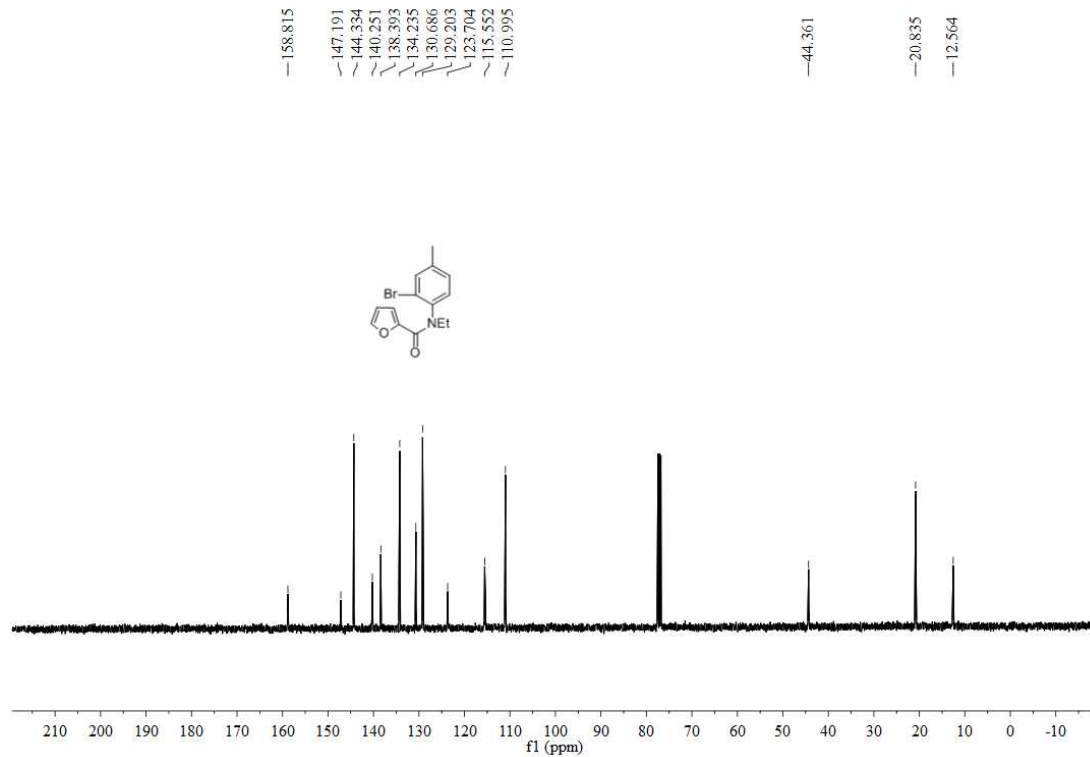

<sup>13</sup>C NMR spectrum of **12b**

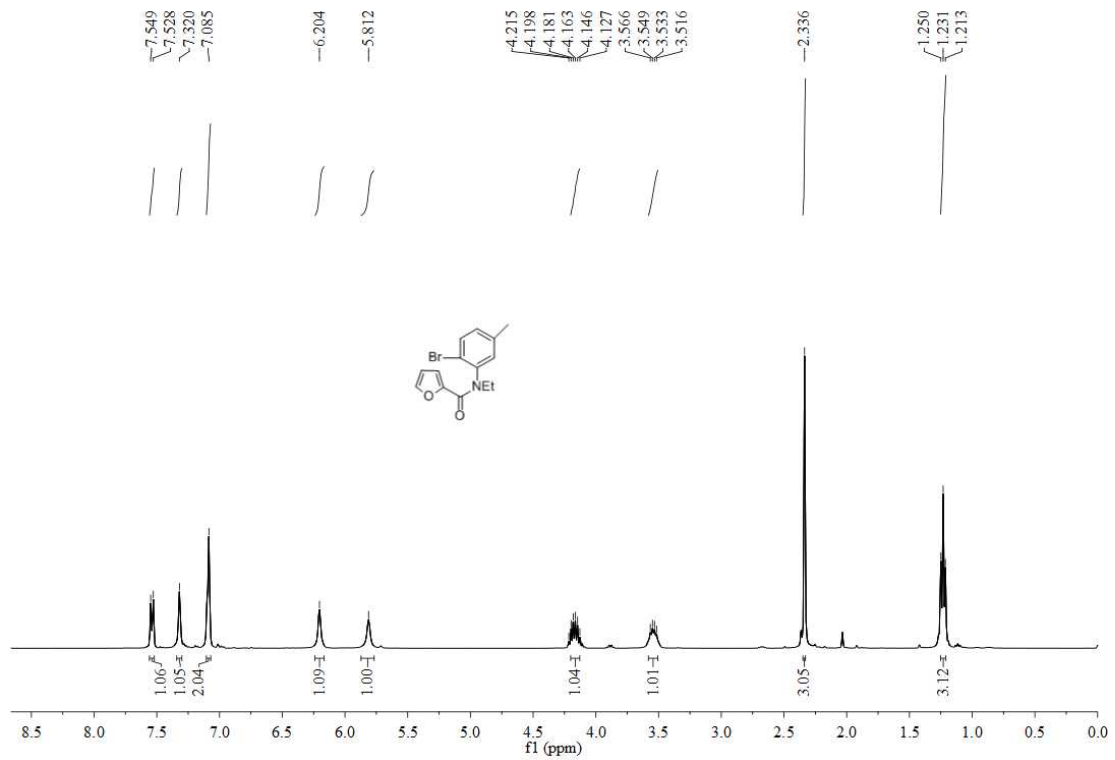

<sup>1</sup>H NMR spectrum of 12c

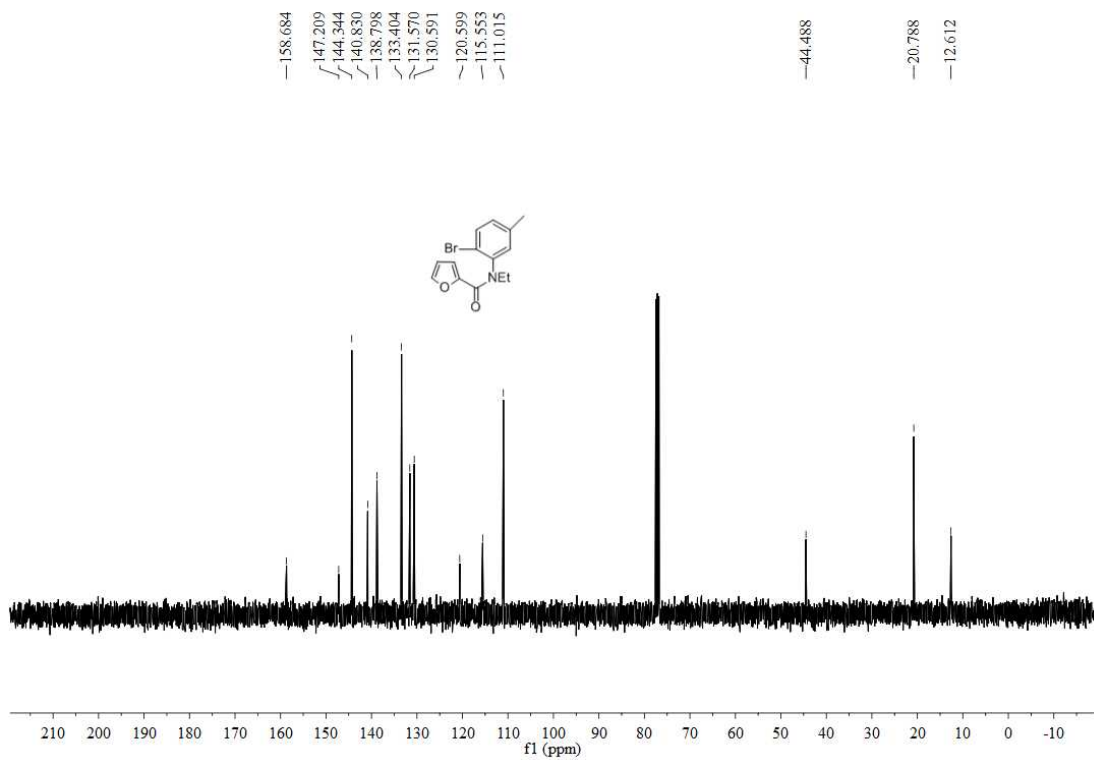

<sup>13</sup>C NMR spectrum of 12c



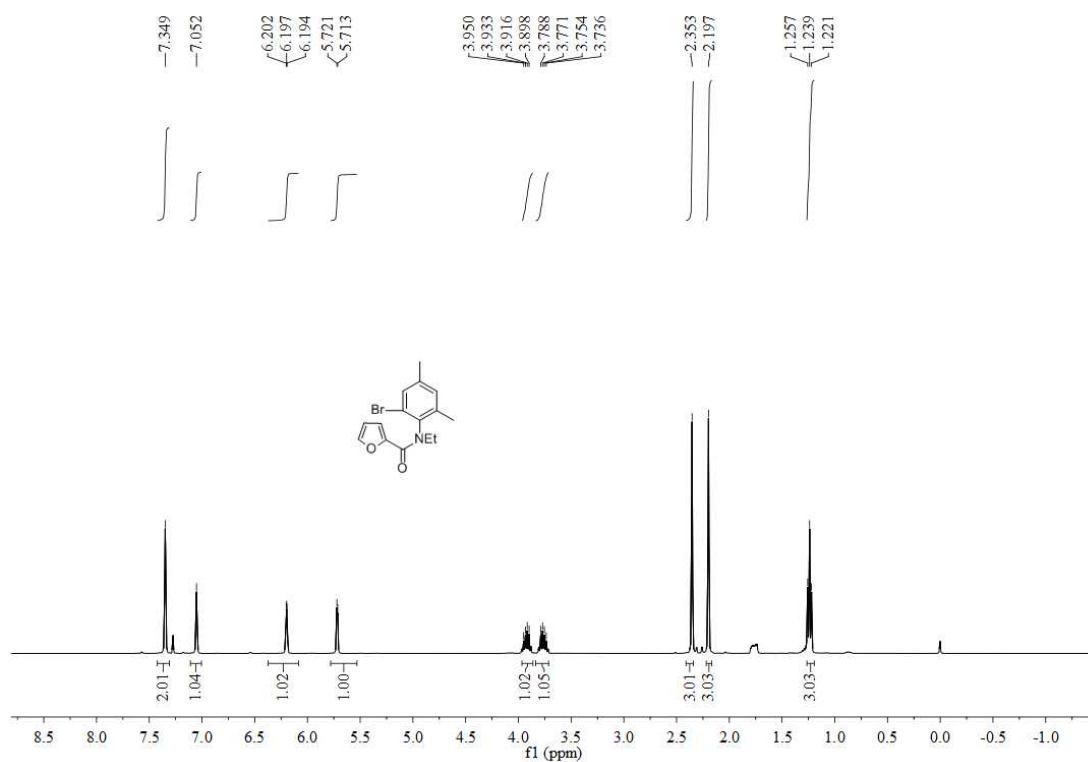

<sup>1</sup>H NMR spectrum of 12d

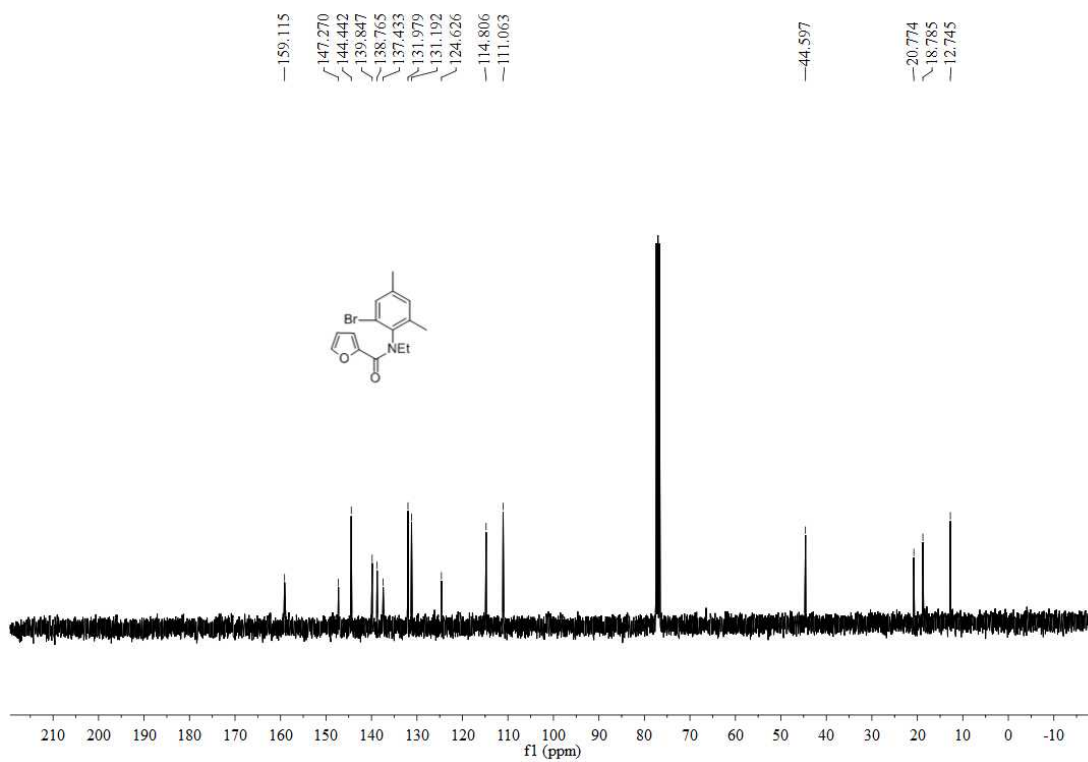

<sup>13</sup>C NMR spectrum of 12d

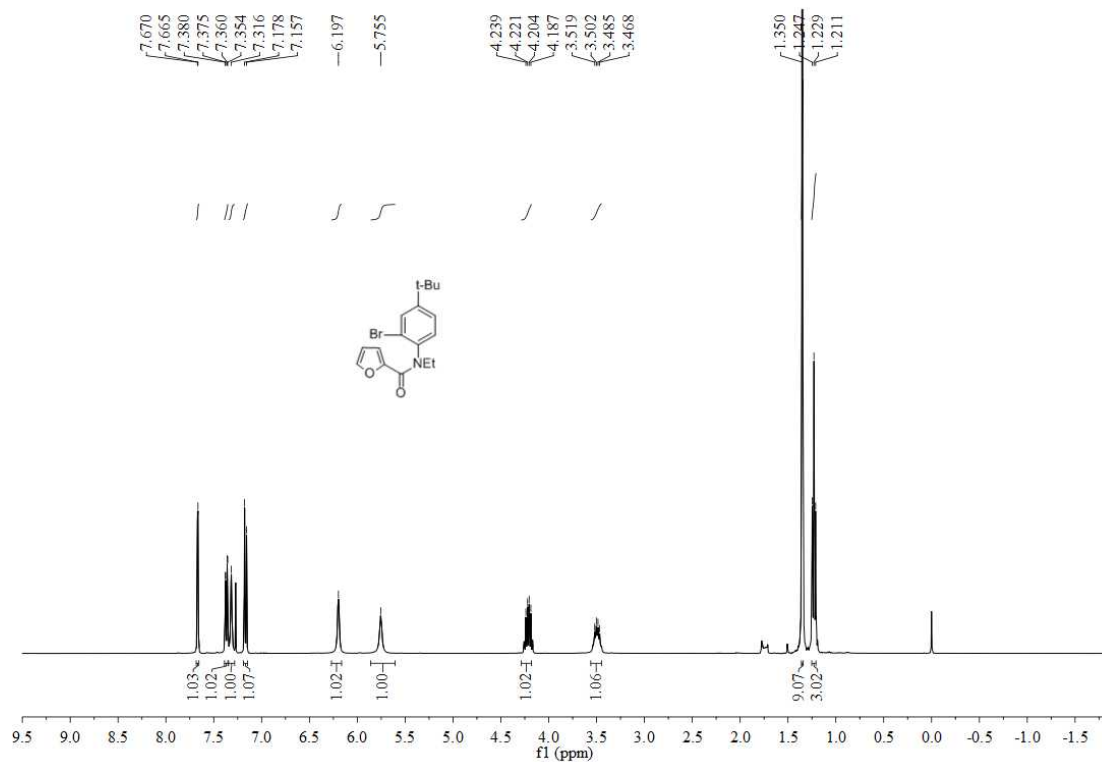

<sup>1</sup>H NMR spectrum of 12e

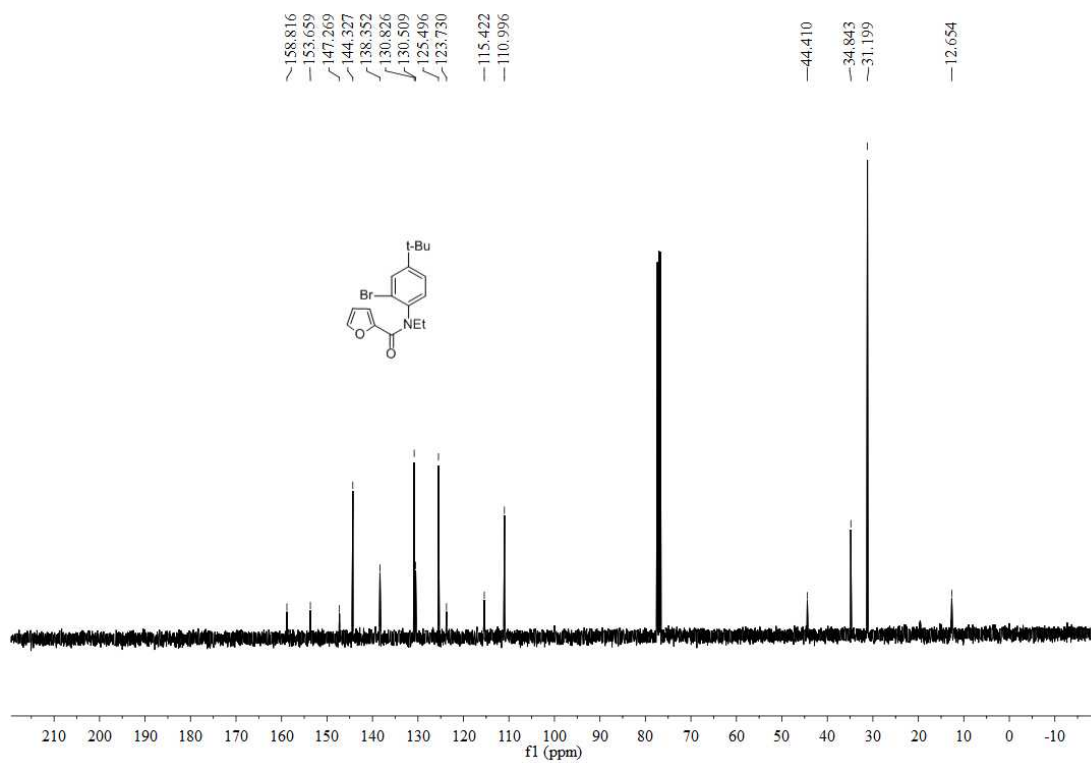

<sup>13</sup>C NMR spectrum of 12e

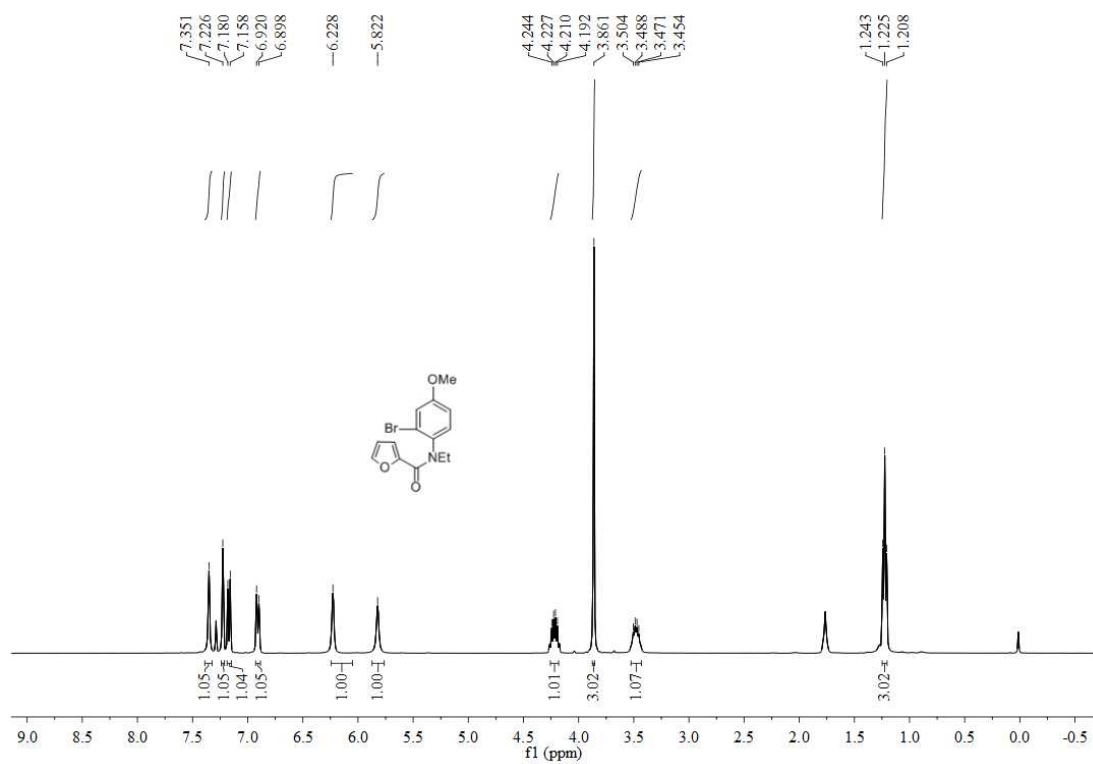

<sup>1</sup>H NMR spectrum of 12f

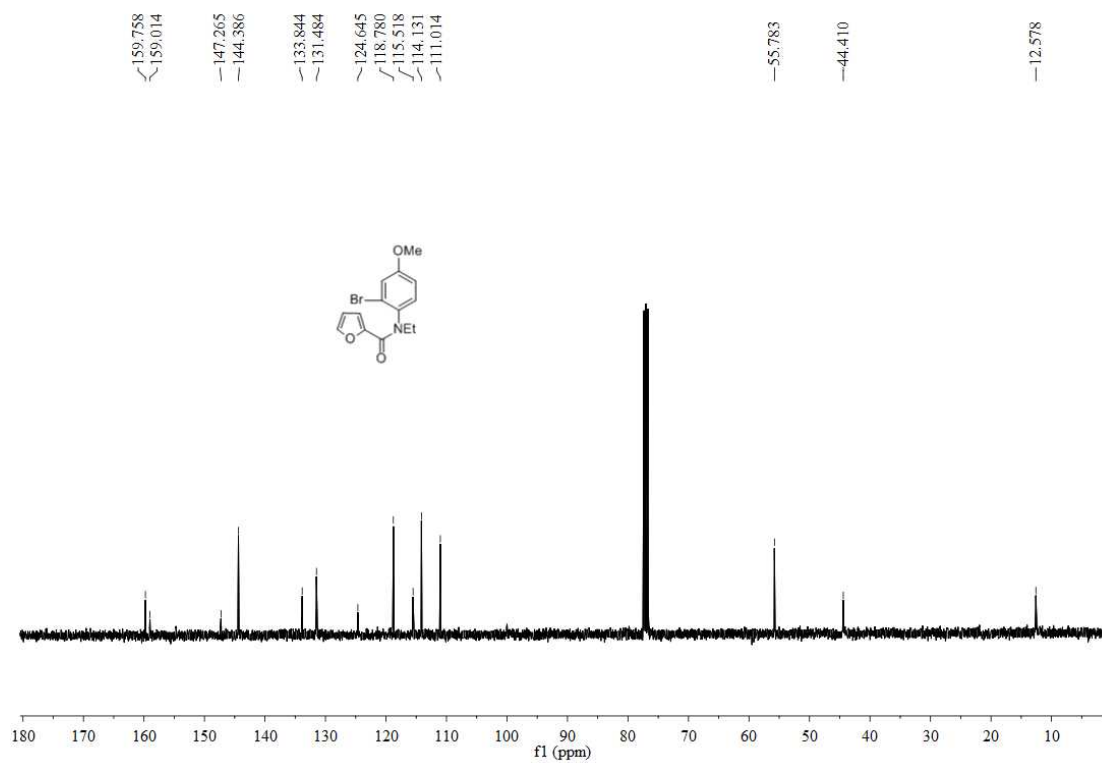

<sup>13</sup>C NMR spectrum of 12f

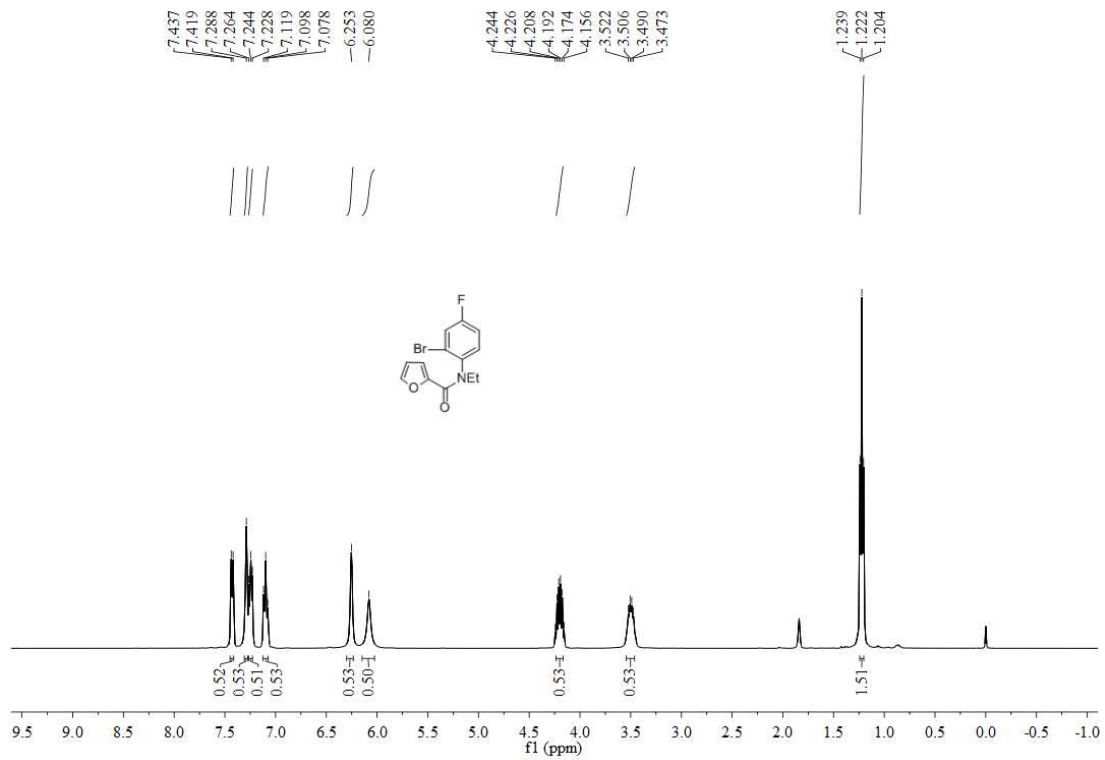

$^1\text{H}$  NMR spectrum of **12g**

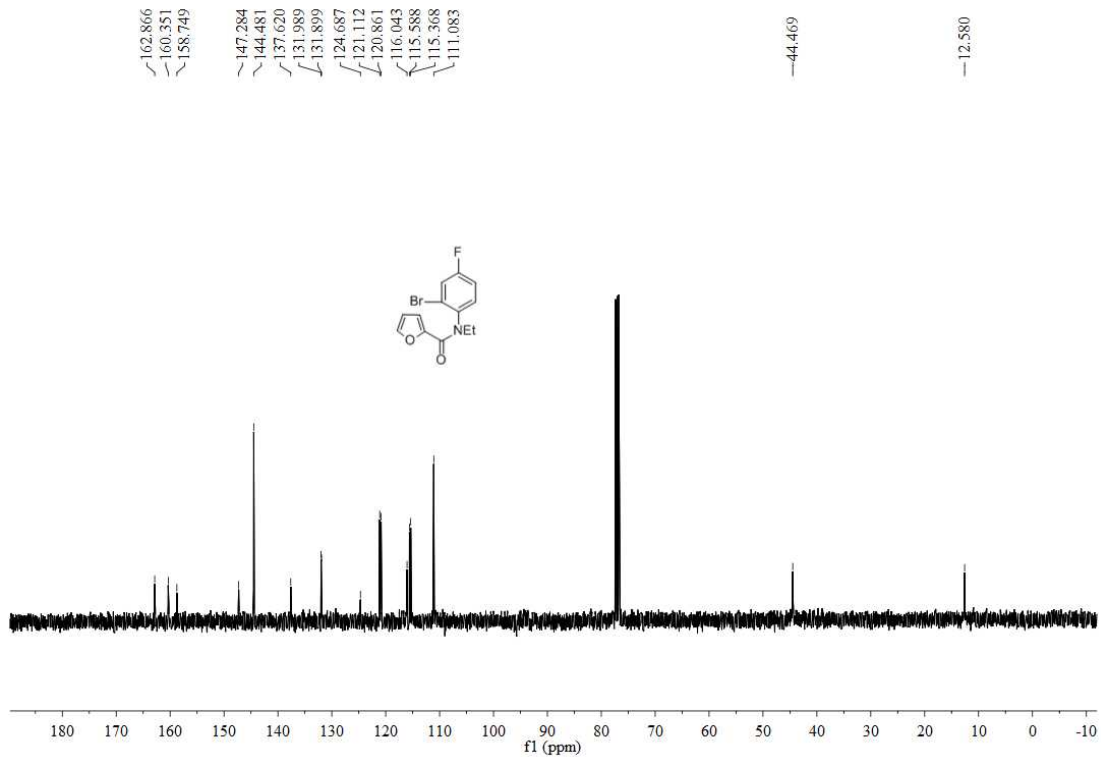

$^{13}\text{C}$  NMR spectrum of **12g**

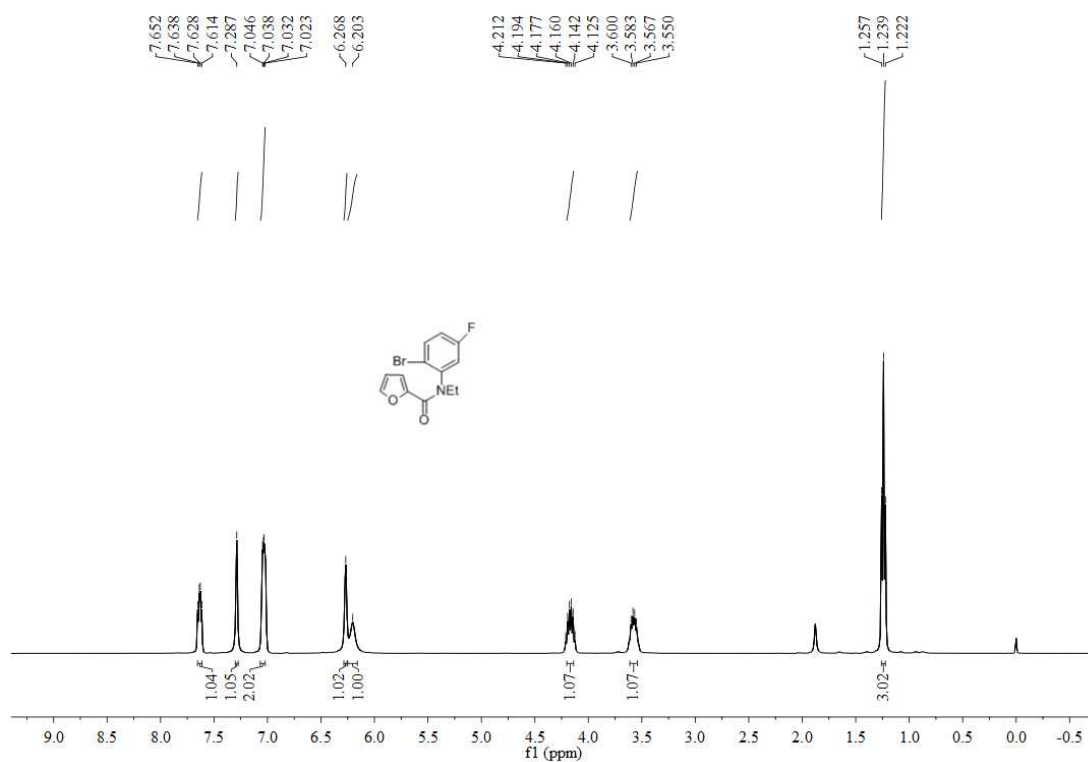

<sup>1</sup>H NMR spectrum of 12h

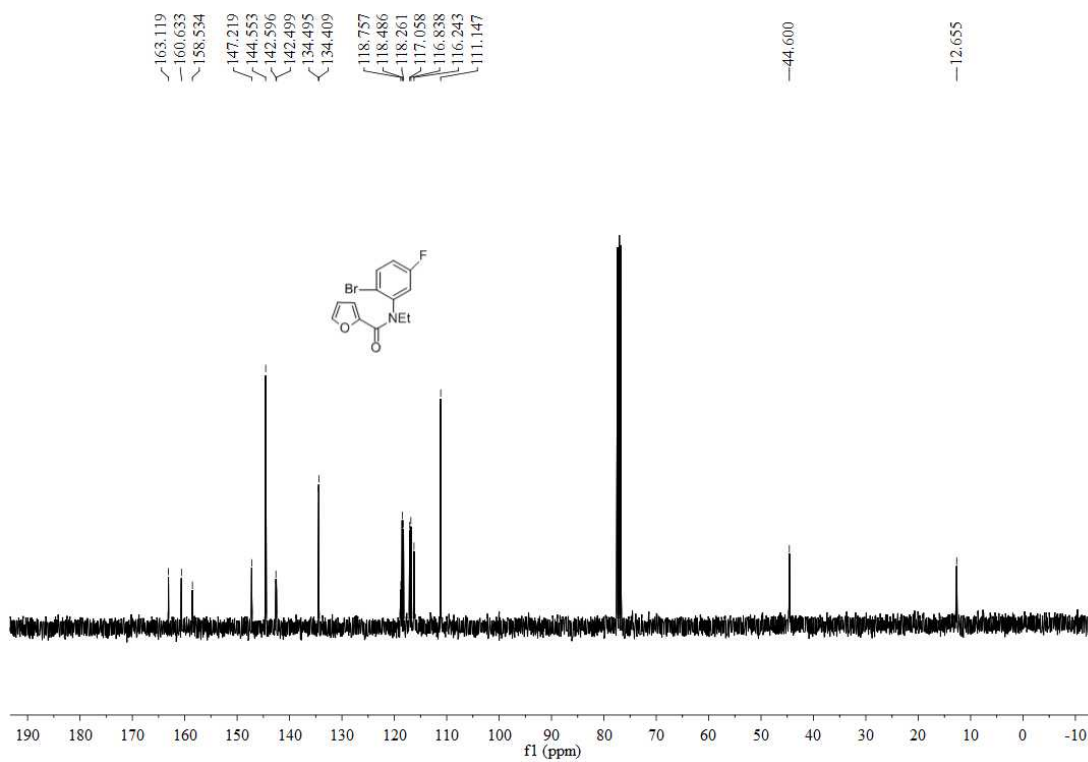

<sup>13</sup>C NMR spectrum of 12h

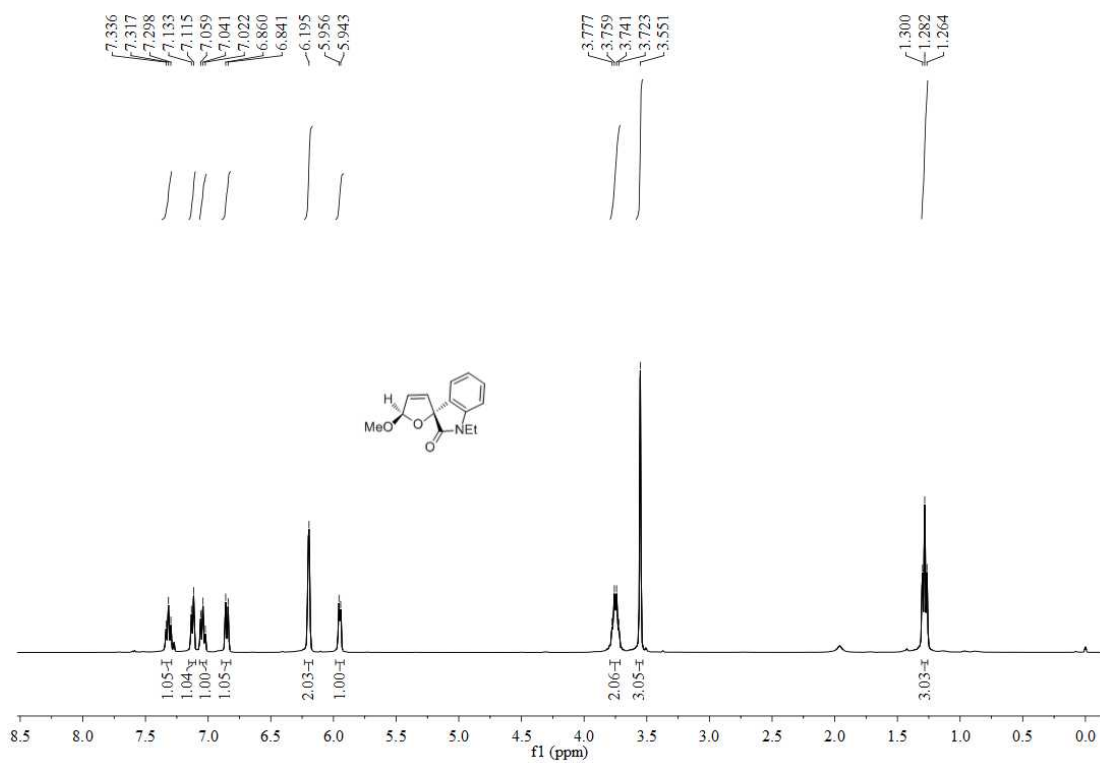

<sup>1</sup>H NMR spectrum of 13a

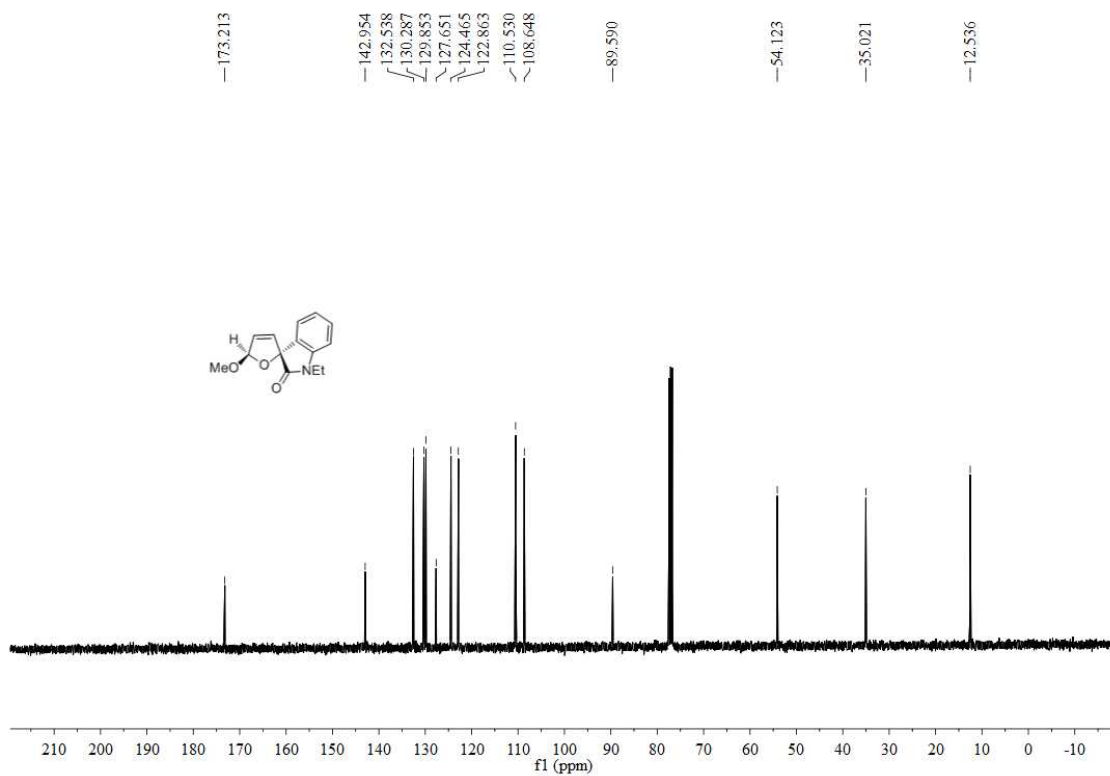

<sup>13</sup>C NMR spectrum of 13a

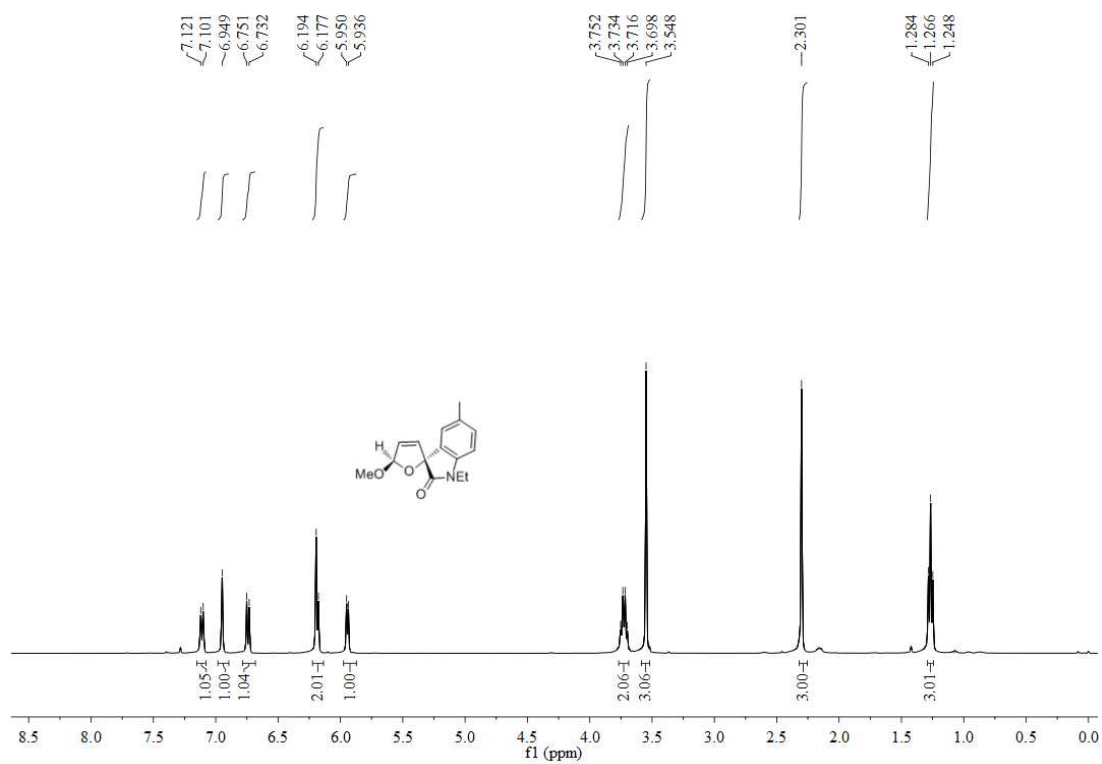

<sup>1</sup>H NMR spectrum of **13b**

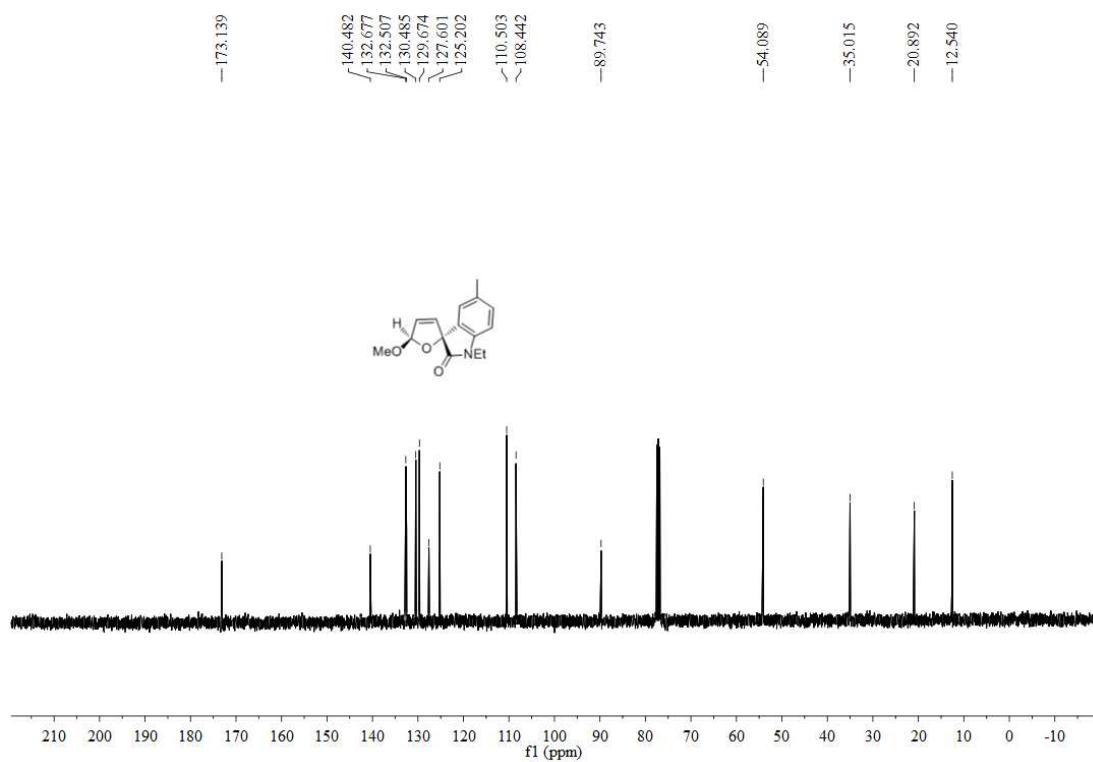

<sup>13</sup>C NMR spectrum of **13b**

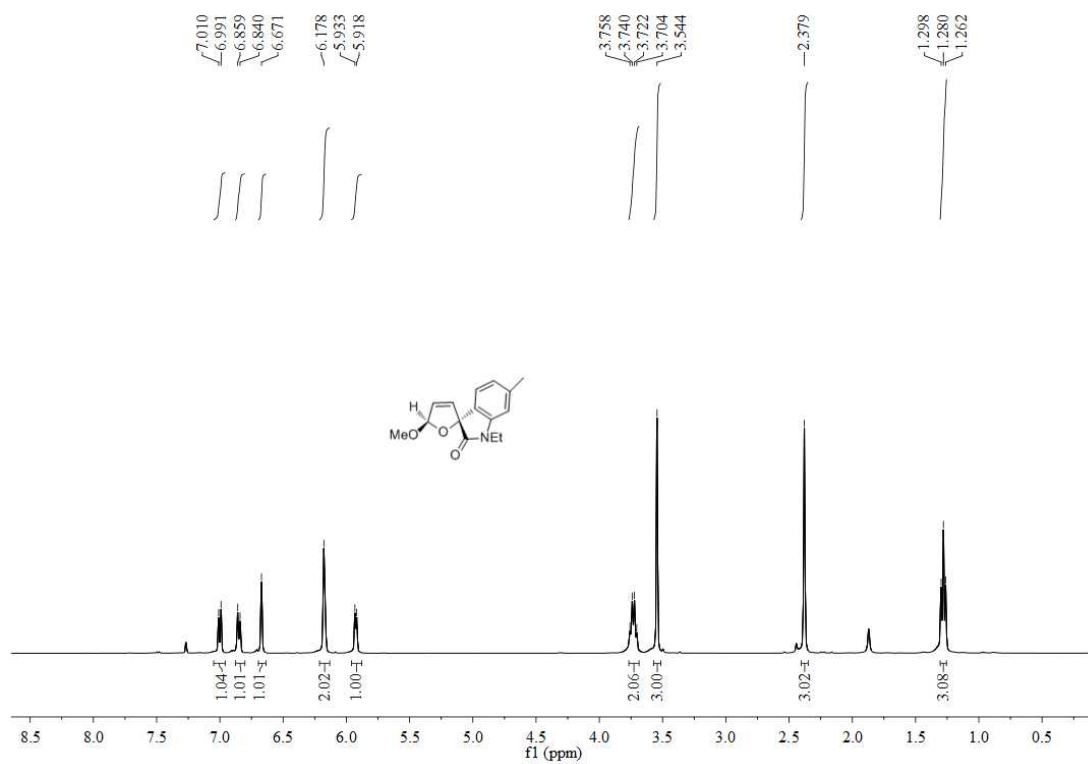

<sup>1</sup>H NMR spectrum of 13c

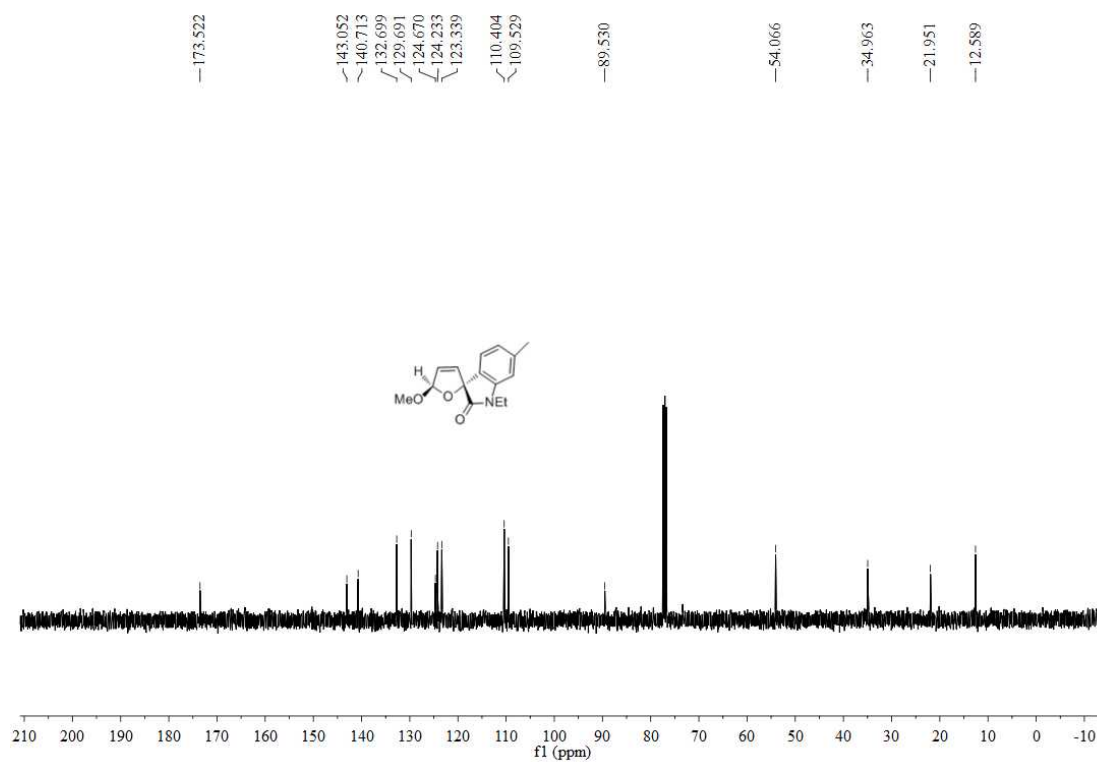

<sup>13</sup>C NMR spectrum of 13c



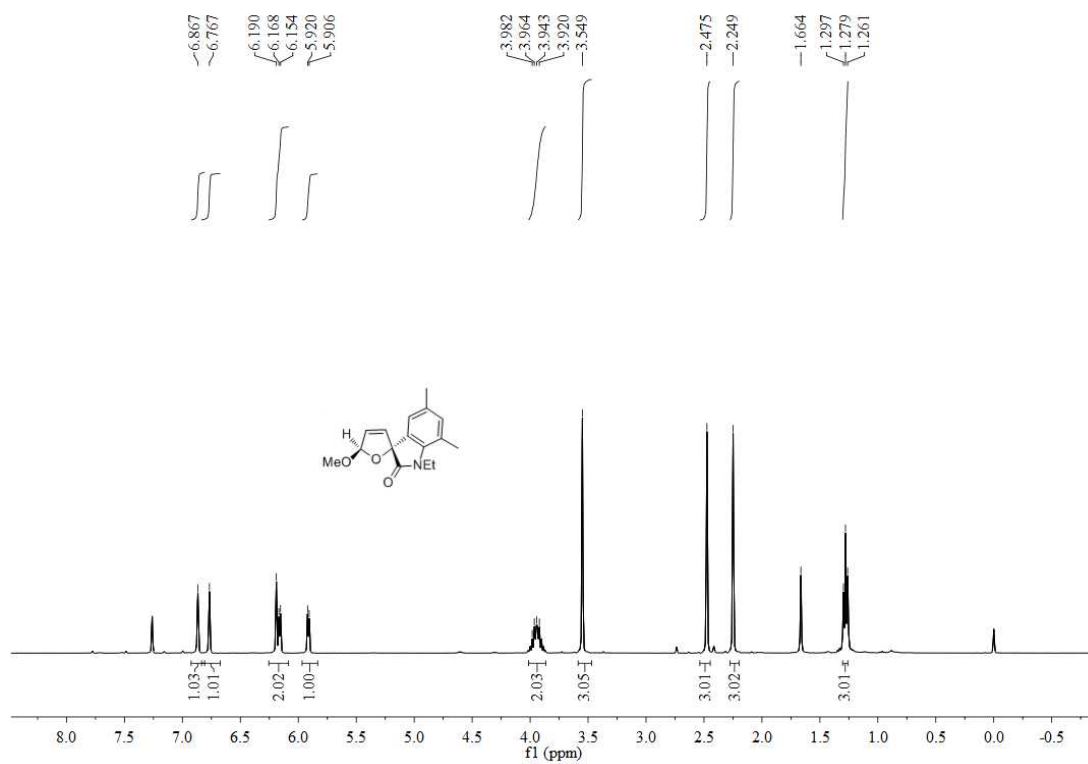

<sup>1</sup>H NMR spectrum of 13d

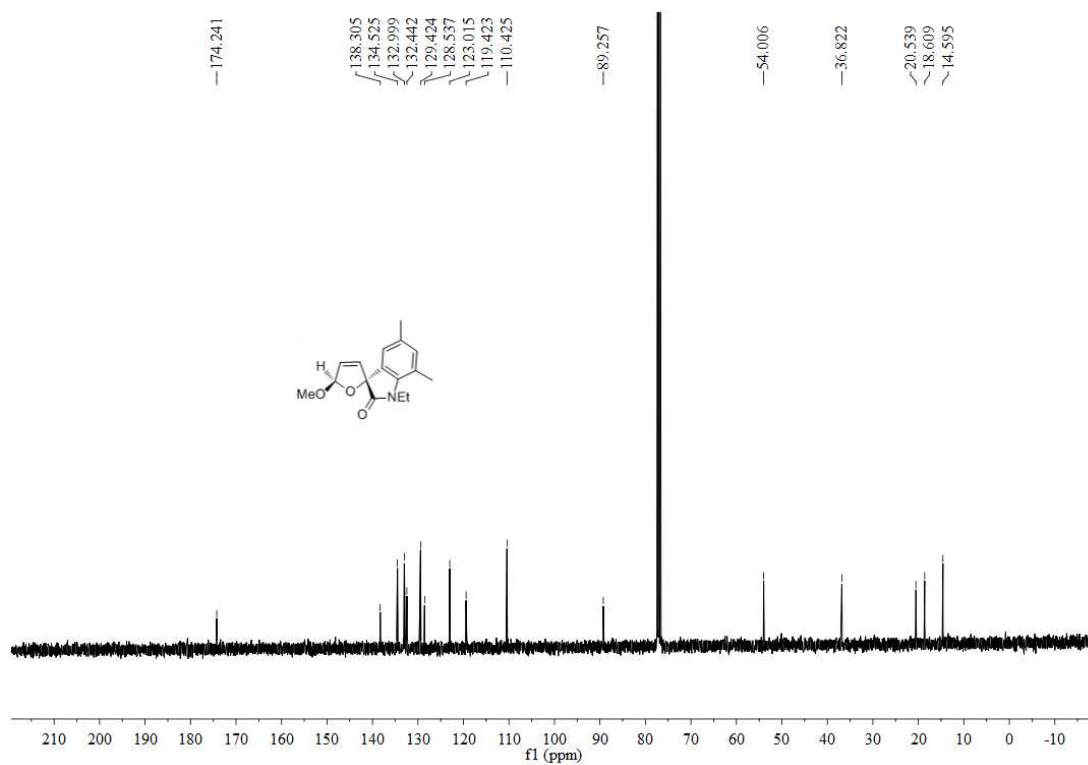

<sup>13</sup>C NMR spectrum of 13d

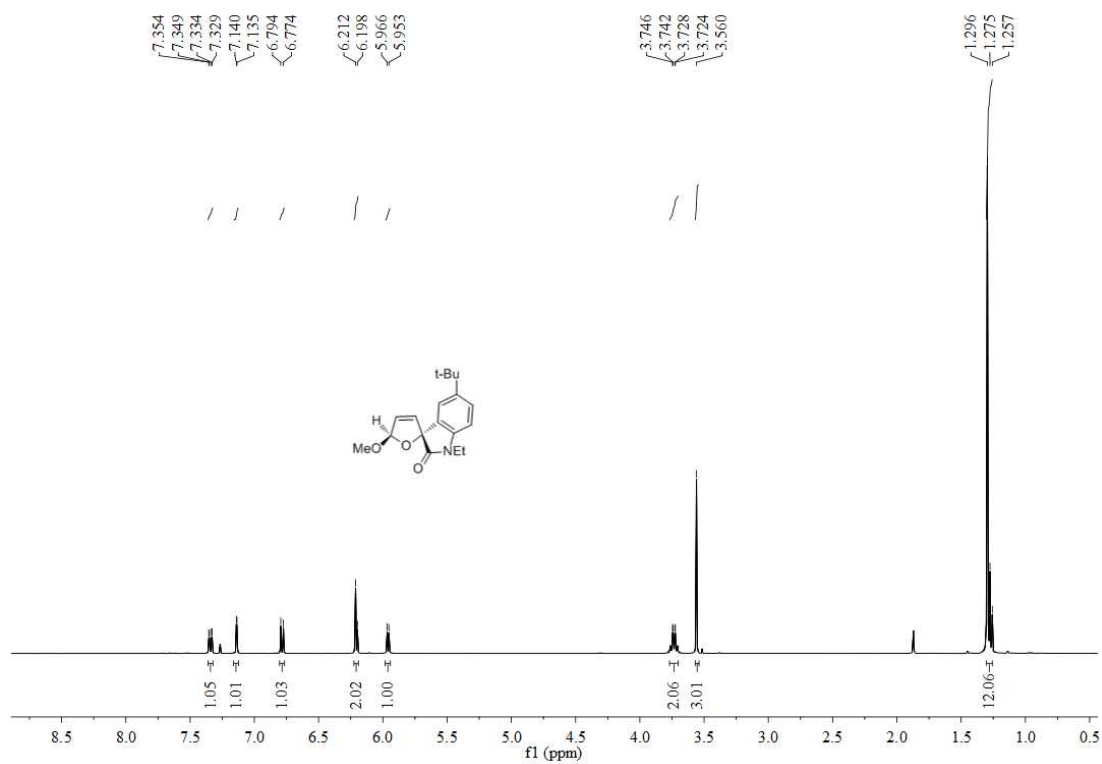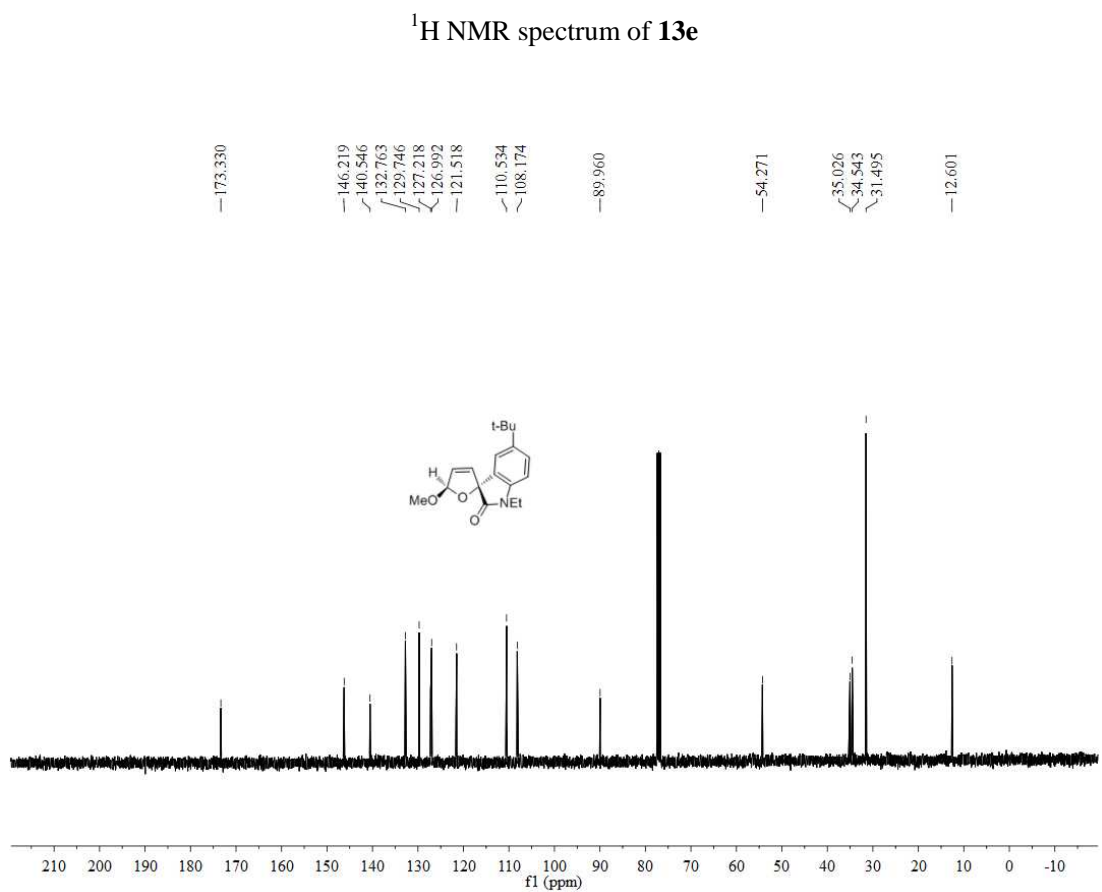

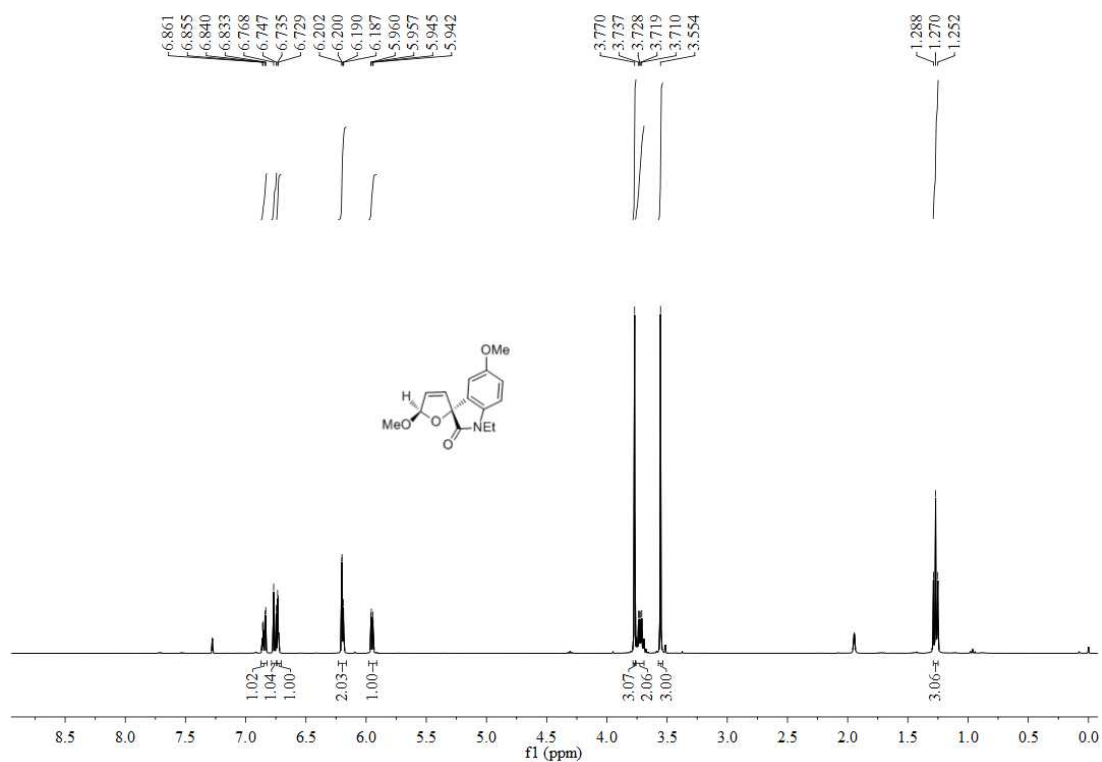

<sup>1</sup>H NMR spectrum of **13f**

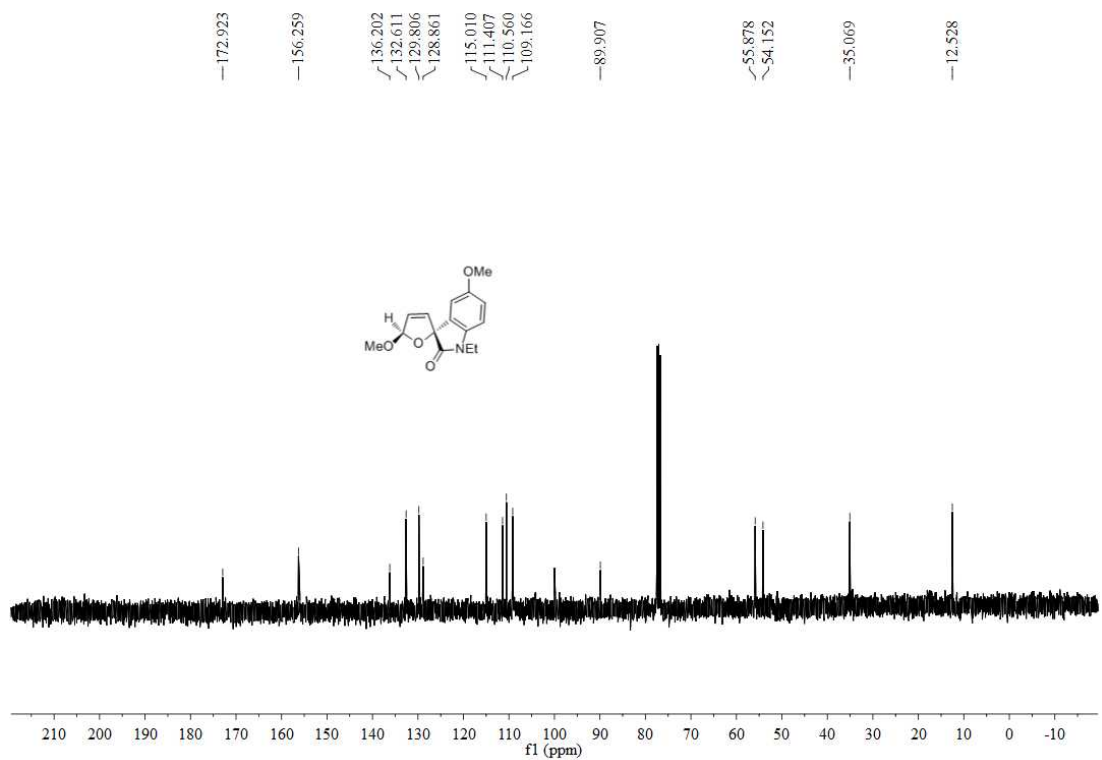

<sup>13</sup>C NMR spectrum of **13f**

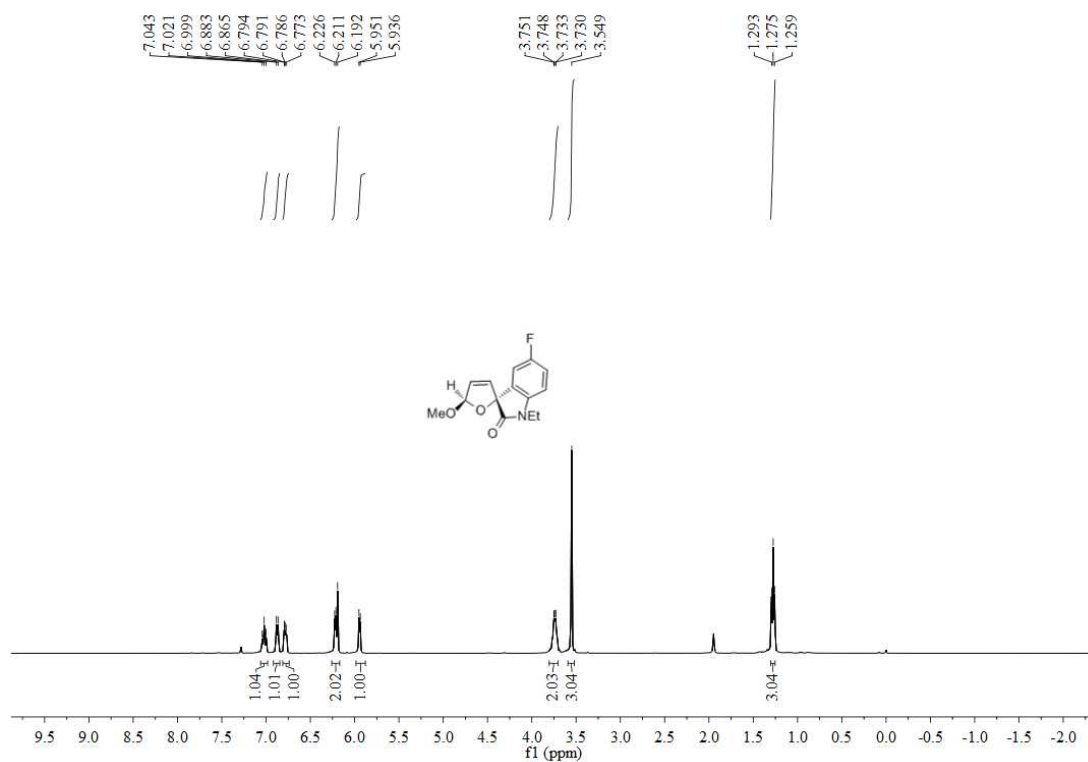

<sup>1</sup>H NMR spectrum of **13g**

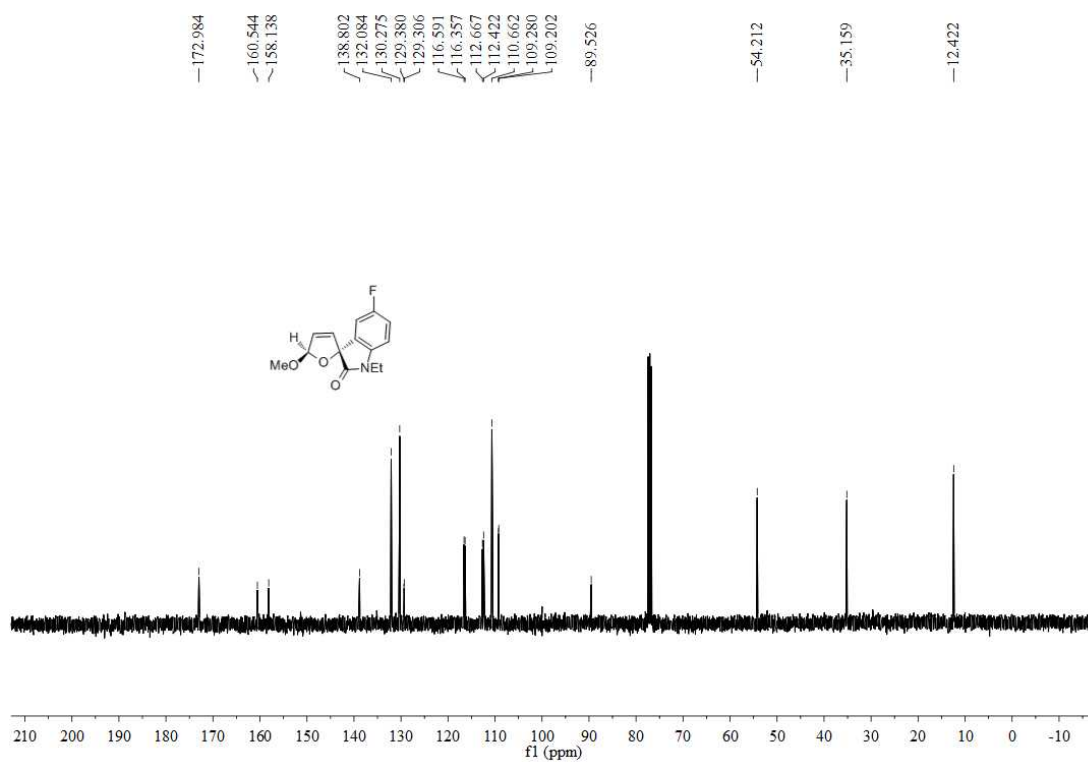

<sup>13</sup>C NMR spectrum of **13g**

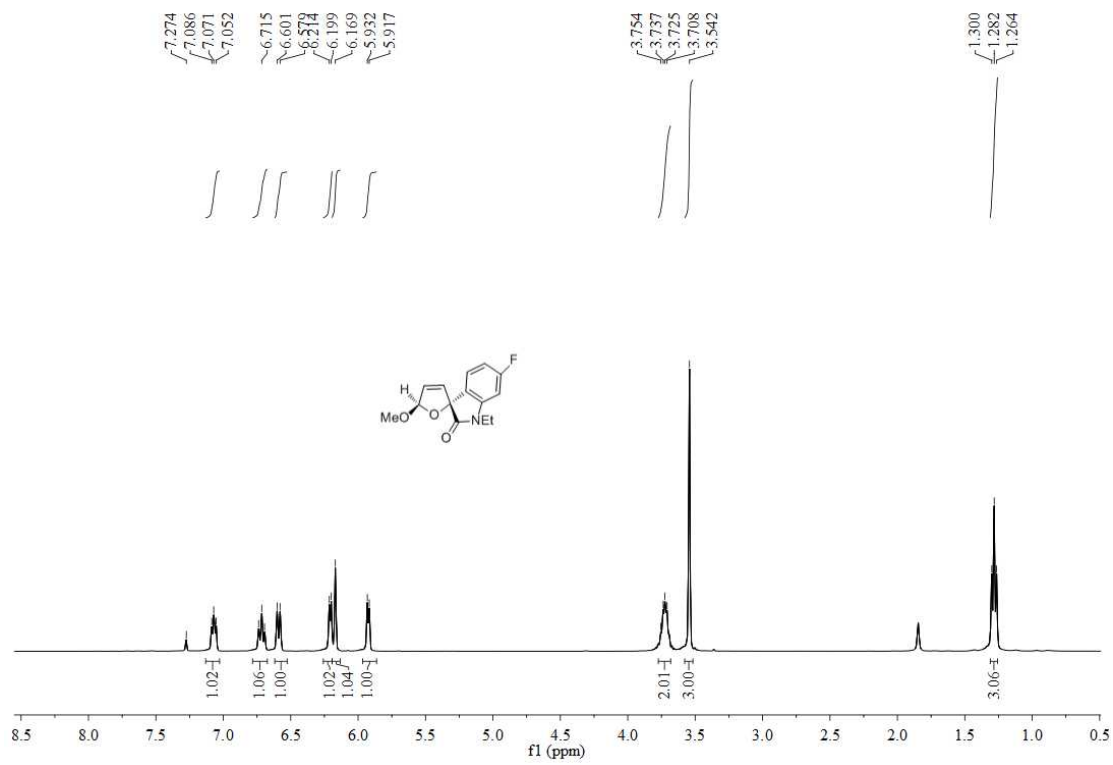

<sup>1</sup>H NMR spectrum of 13h

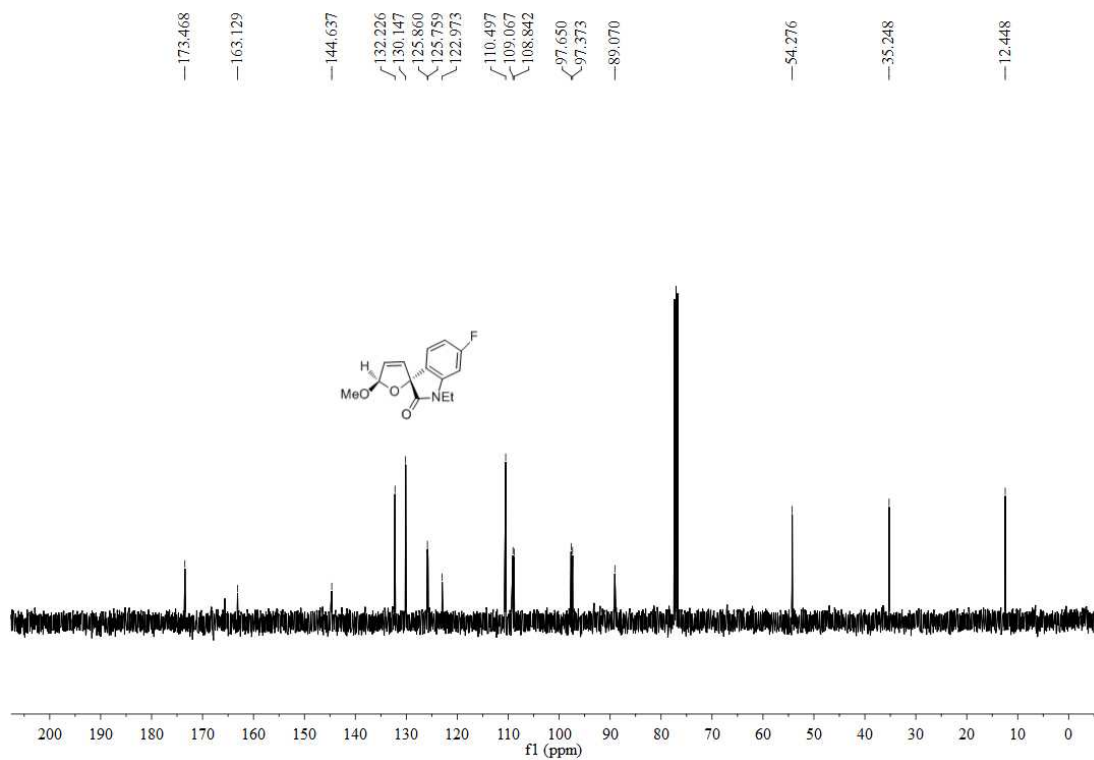

<sup>13</sup>C NMR spectrum of 13h

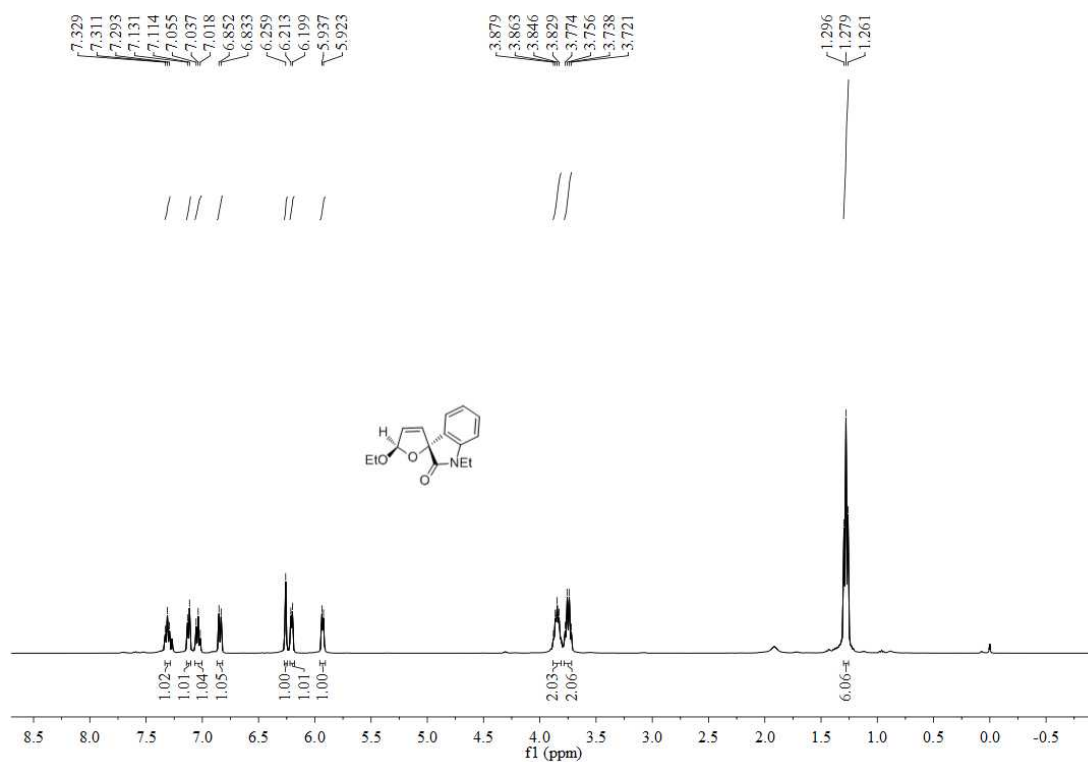

<sup>1</sup>H NMR spectrum of **13i**

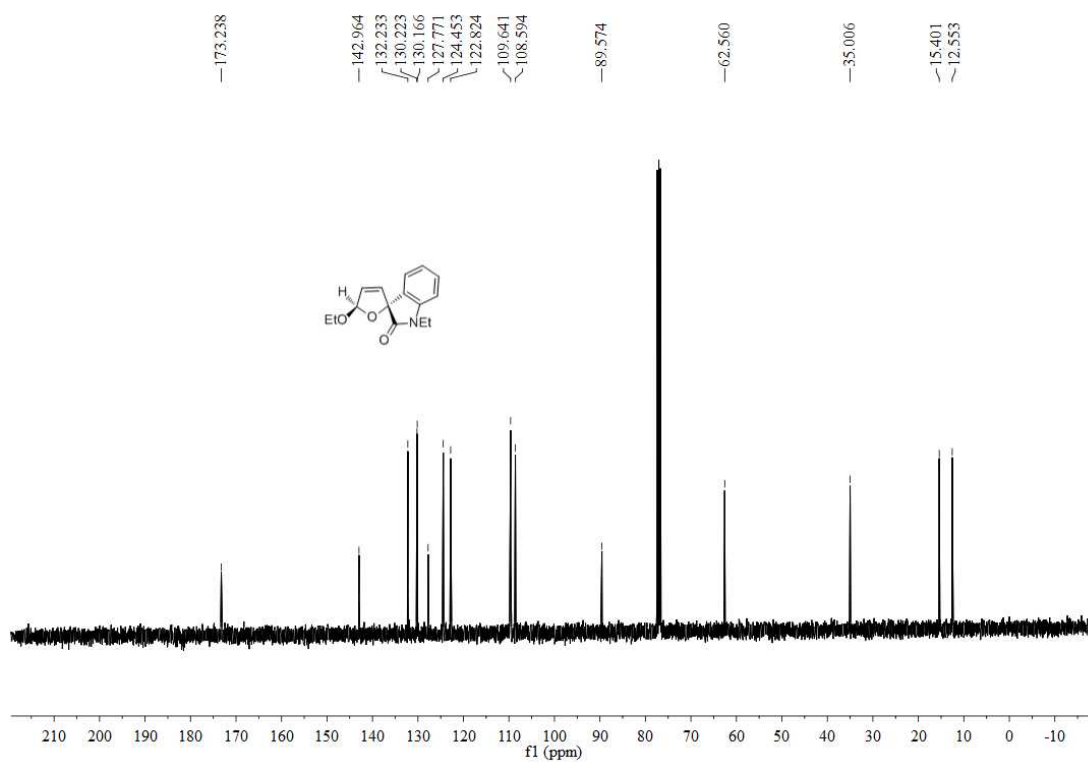

<sup>13</sup>C NMR spectrum of **13i**

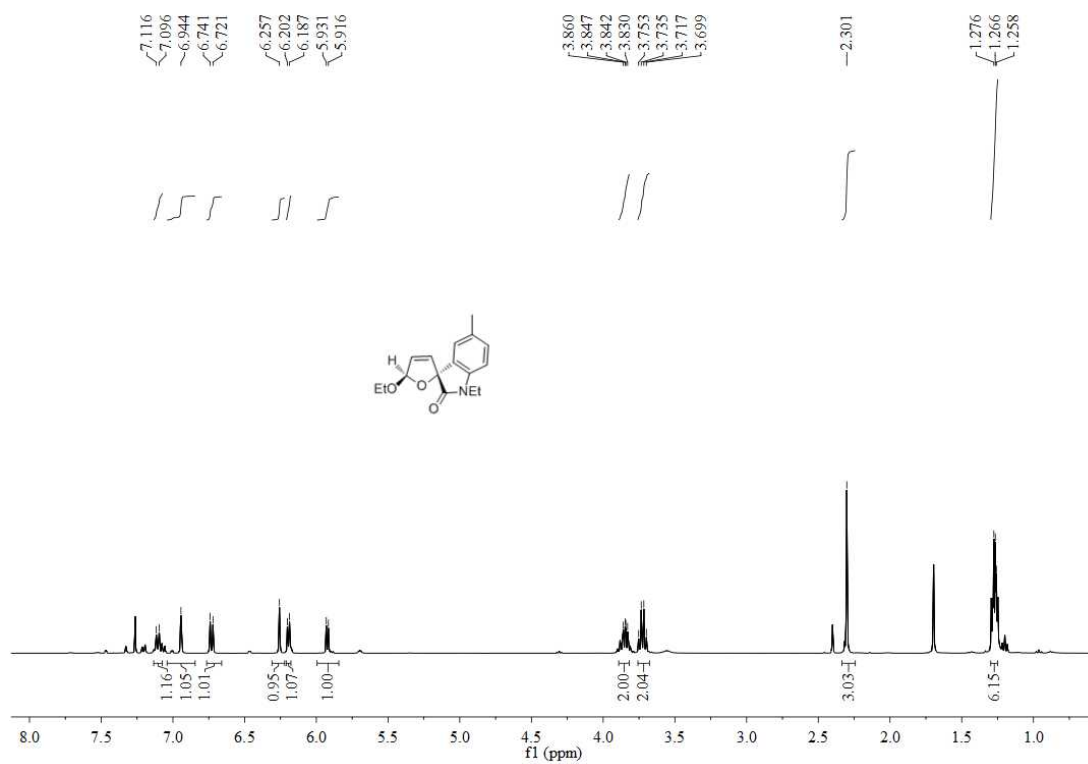

<sup>1</sup>H NMR spectrum of 13j

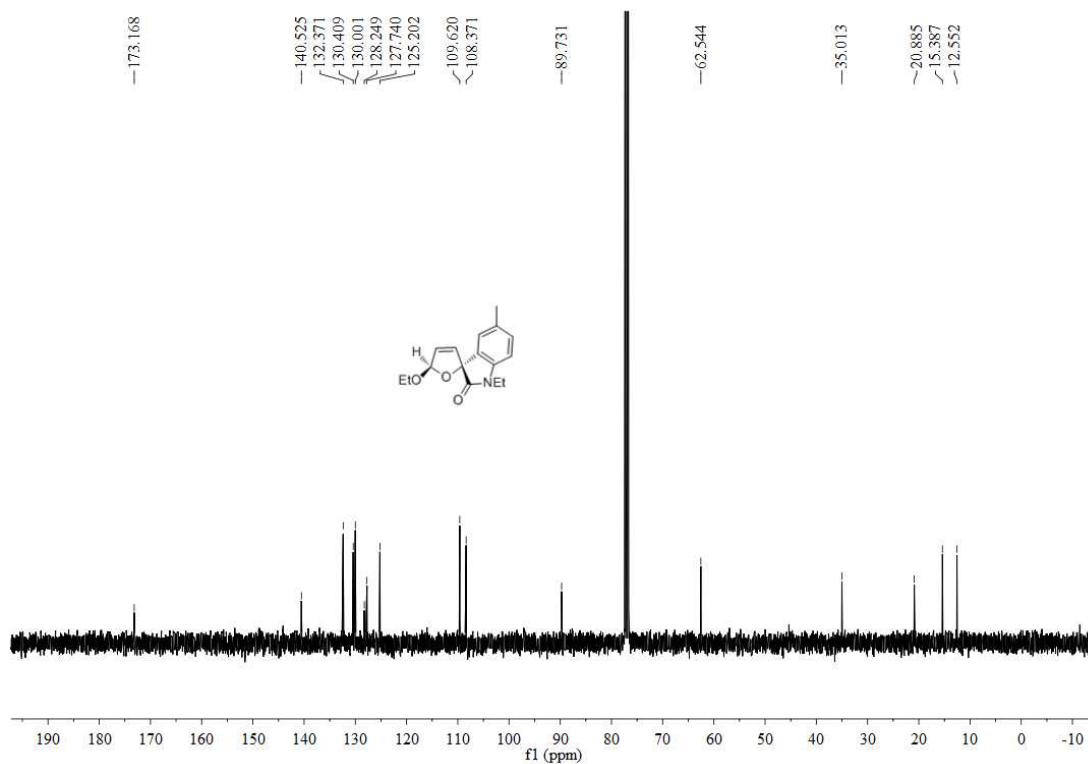

<sup>13</sup>C NMR spectrum of 13j

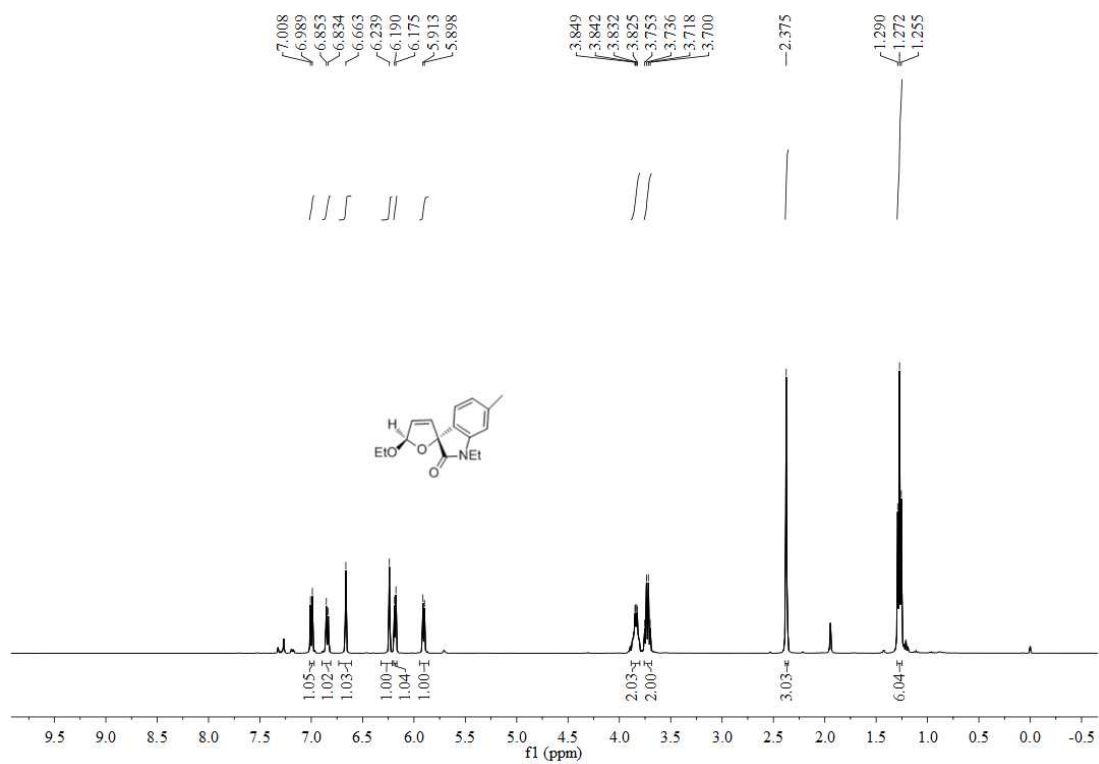

<sup>1</sup>H NMR spectrum of **13k**

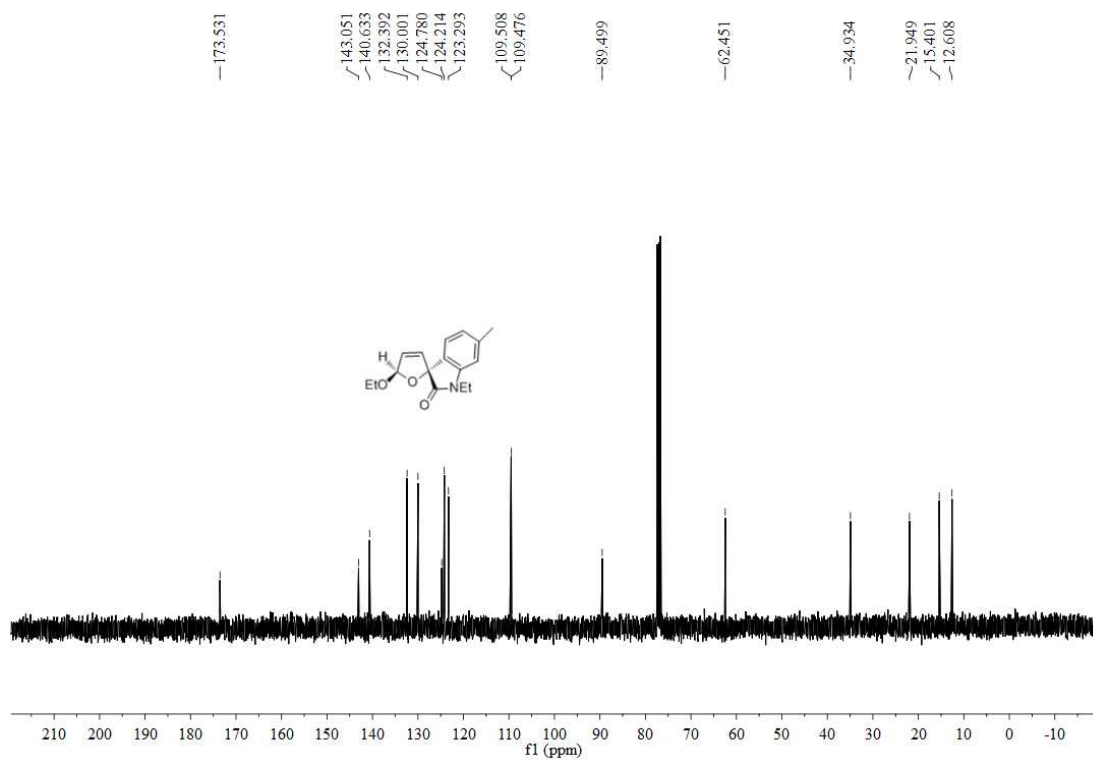

<sup>13</sup>C NMR spectrum of **13k**



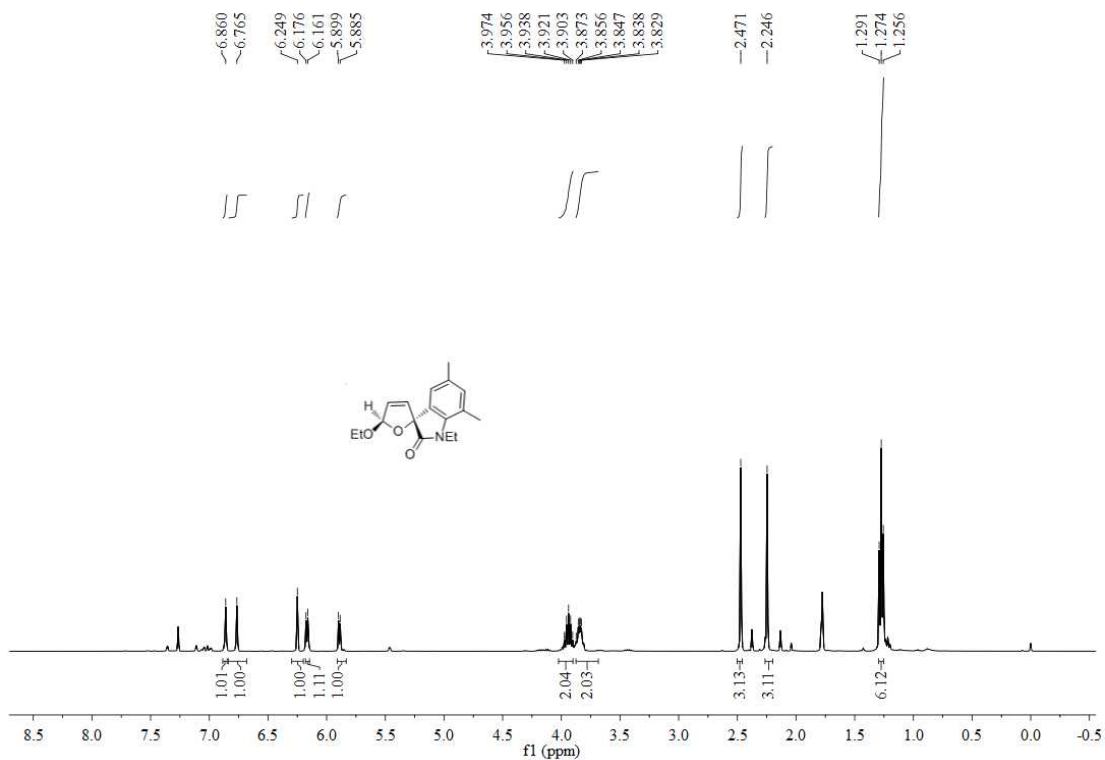

<sup>1</sup>H NMR spectrum of **131**

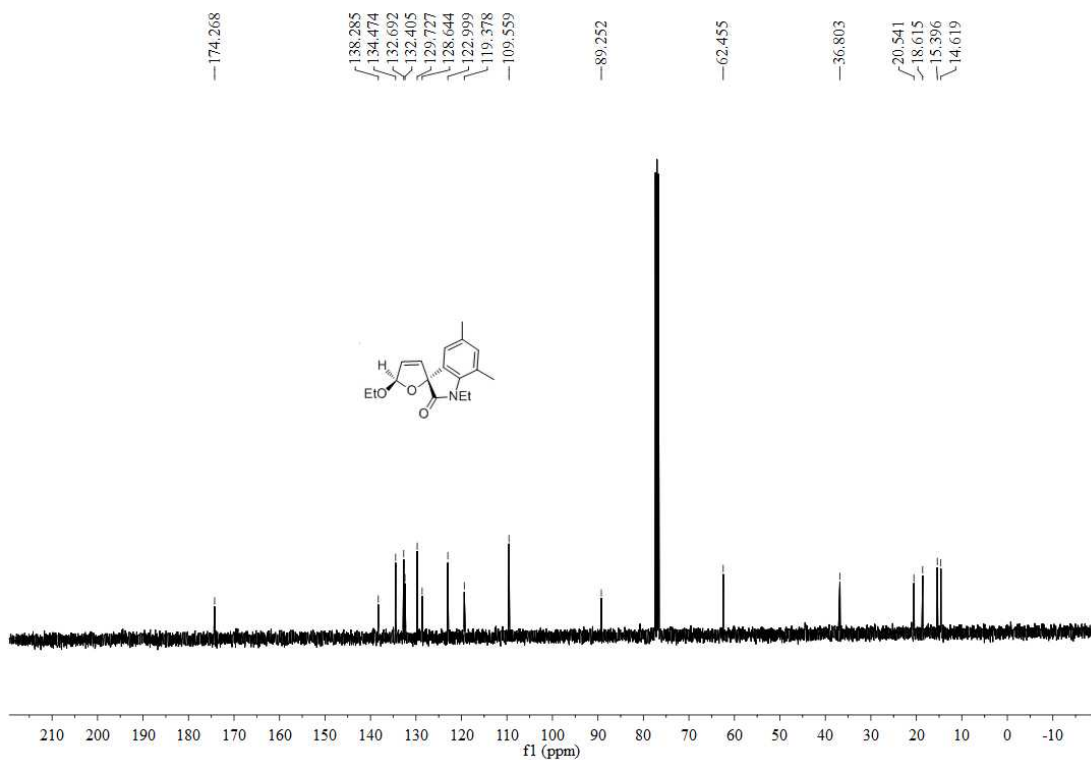

<sup>13</sup>C NMR spectrum of **131**

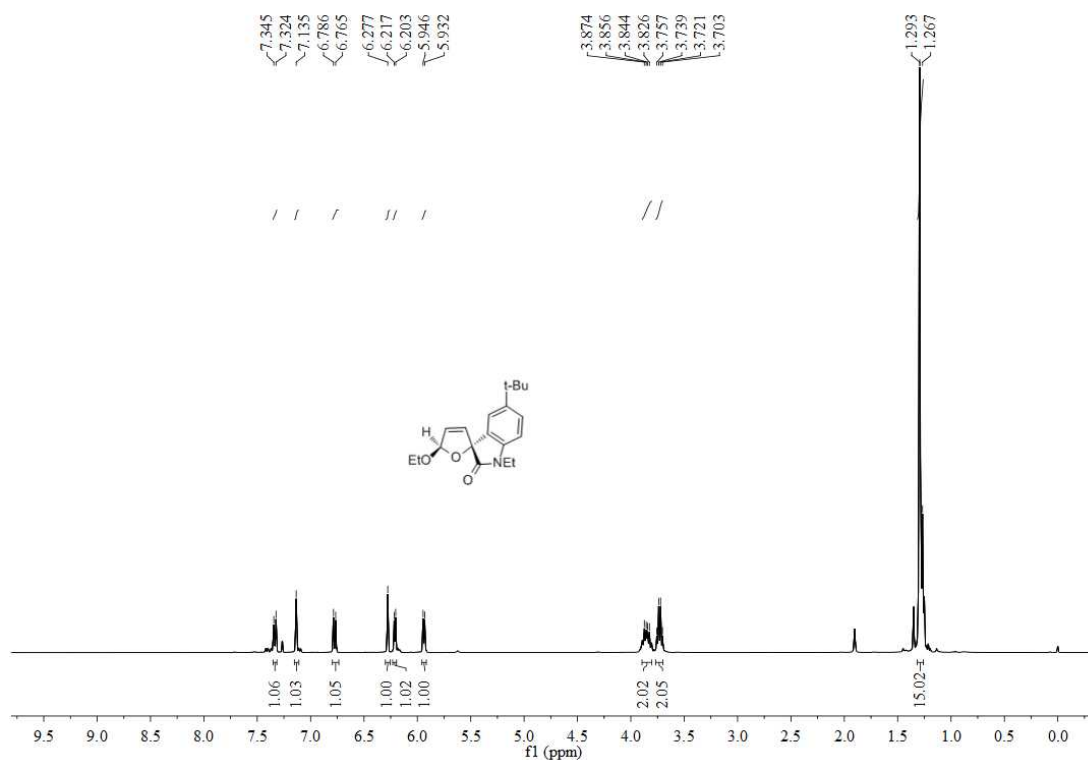

<sup>1</sup>H NMR spectrum of **13m**

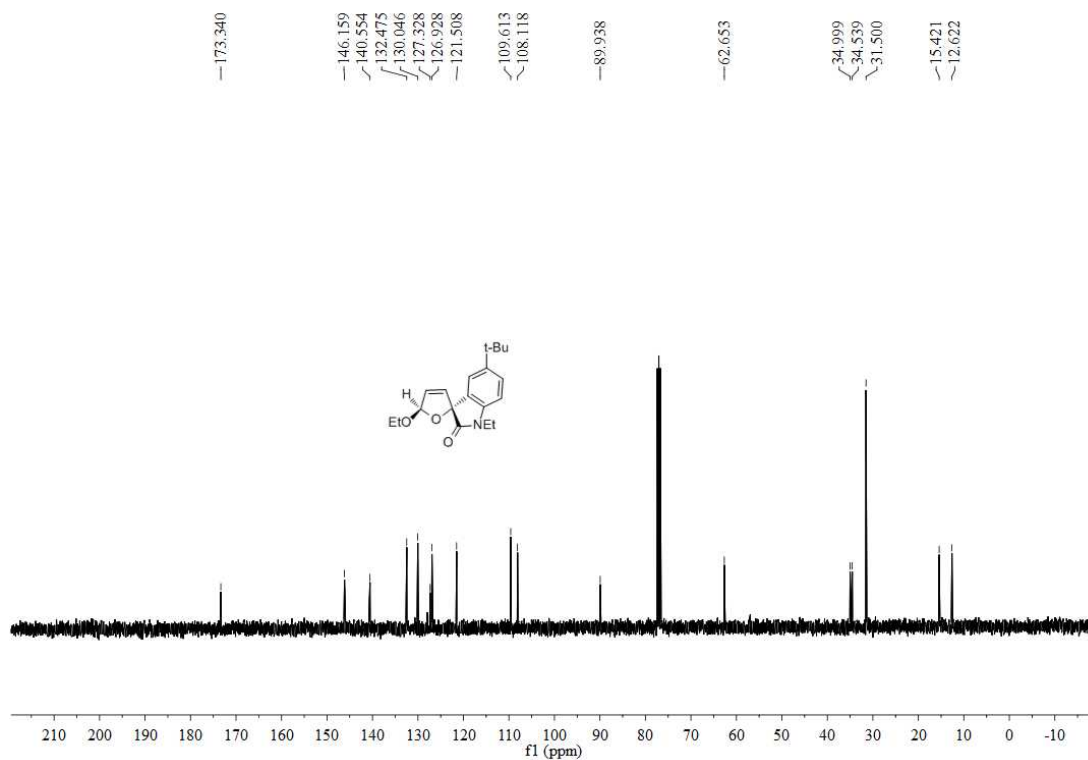

<sup>13</sup>C NMR spectrum of **13m**

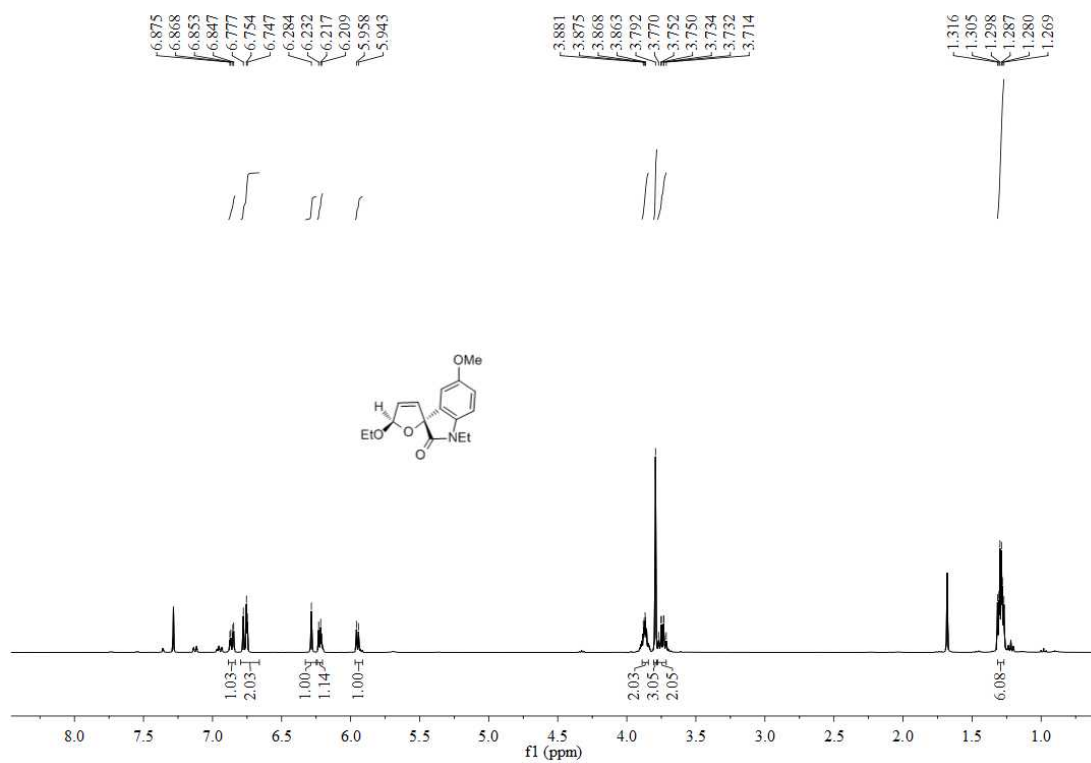

<sup>1</sup>H NMR spectrum of 13n

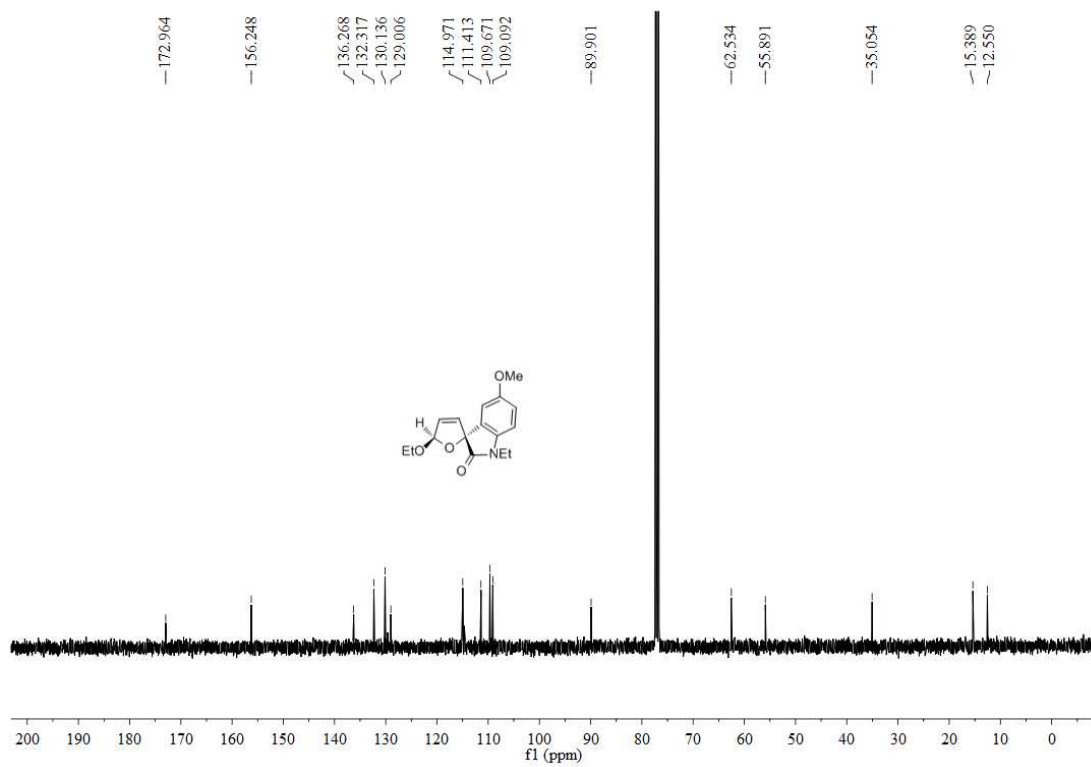

<sup>13</sup>C NMR spectrum of 13n

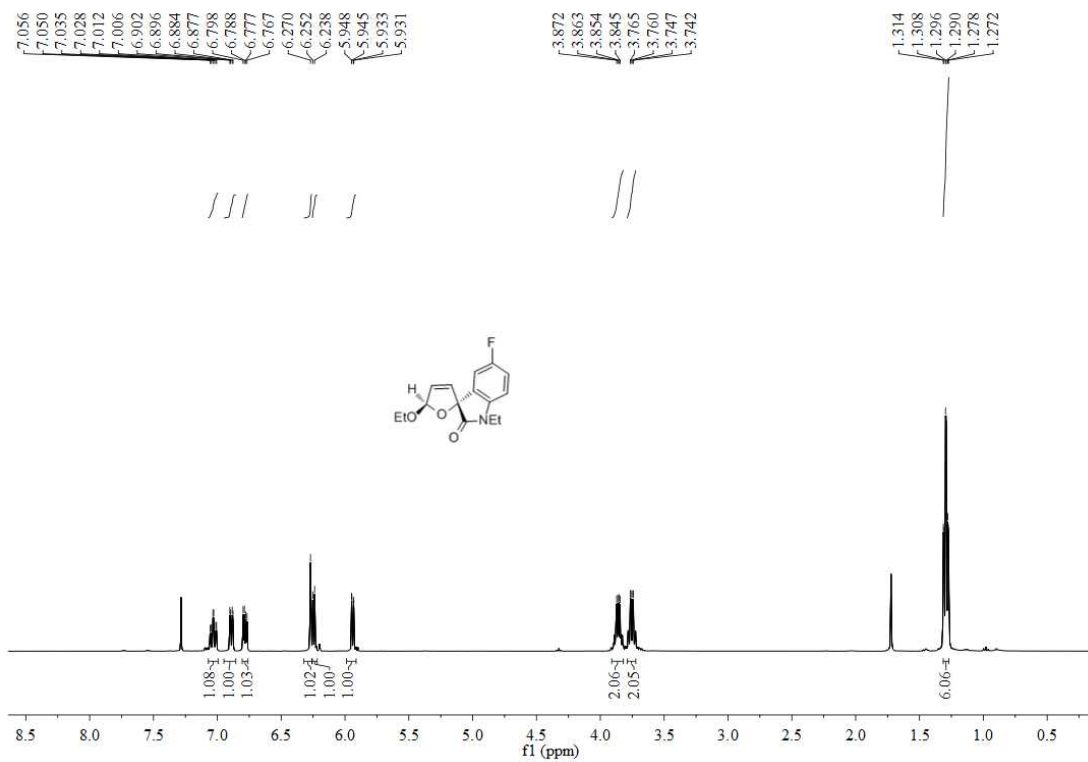

<sup>1</sup>H NMR spectrum of **13o**

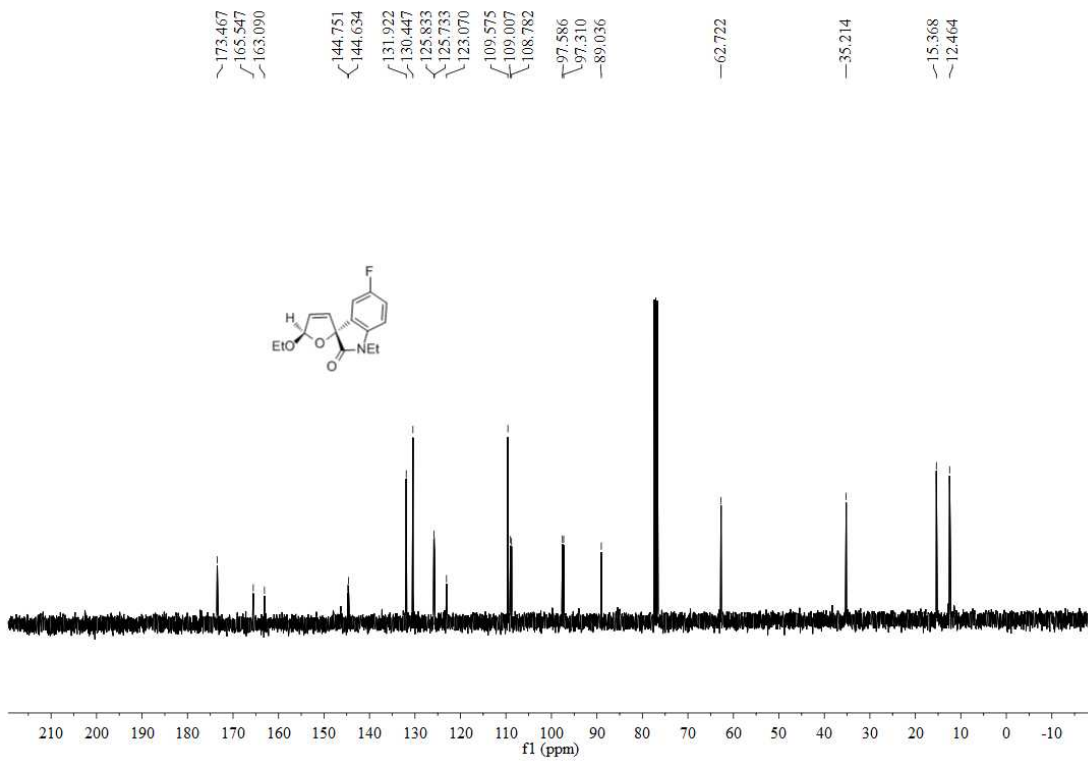

<sup>13</sup>C NMR spectrum of **13o**

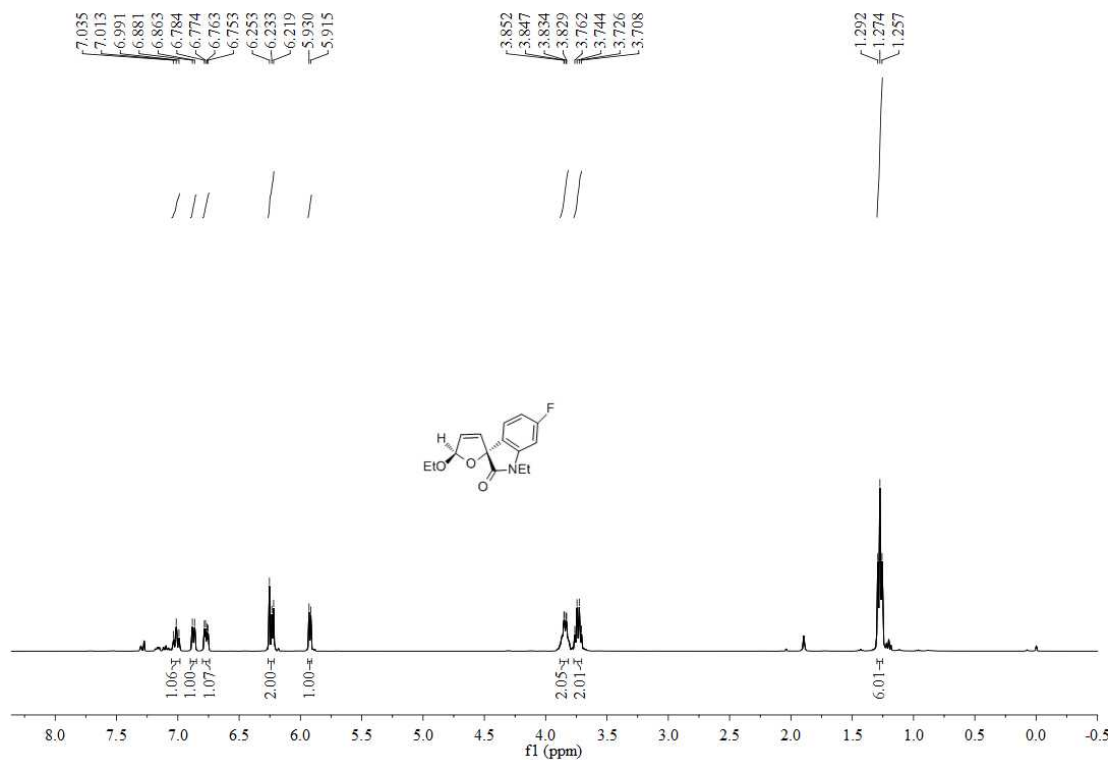

<sup>1</sup>H NMR spectrum of 13p

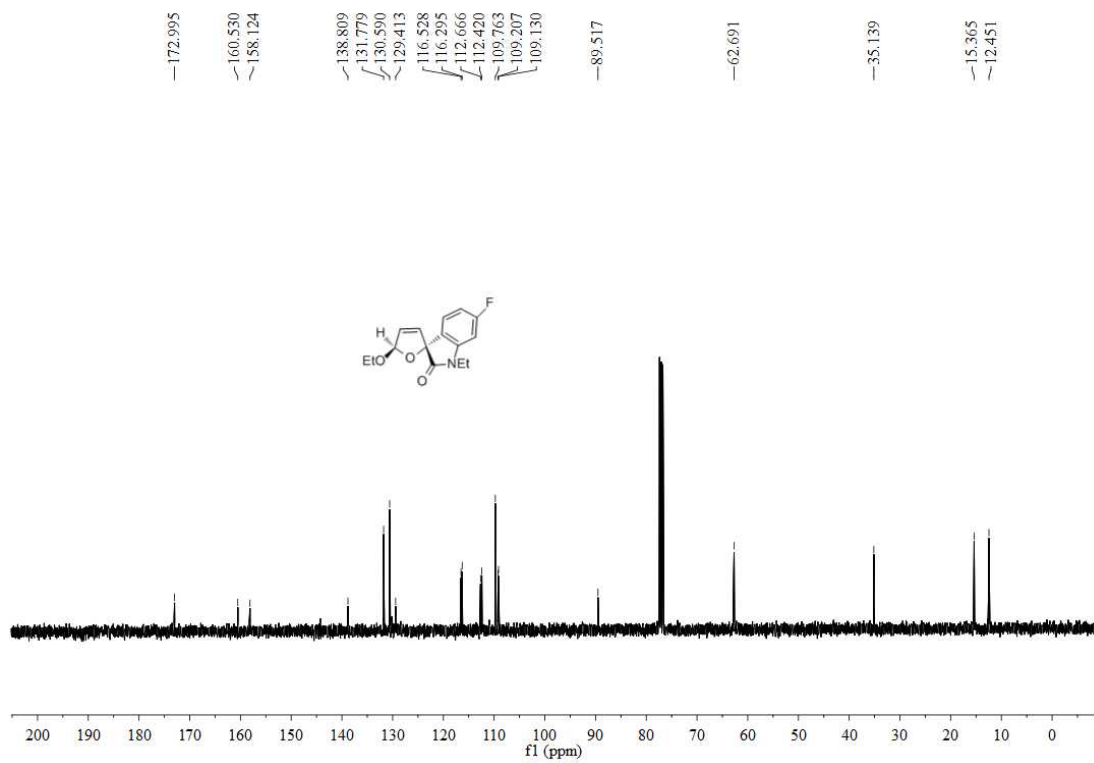

<sup>13</sup>C NMR spectrum of 13p

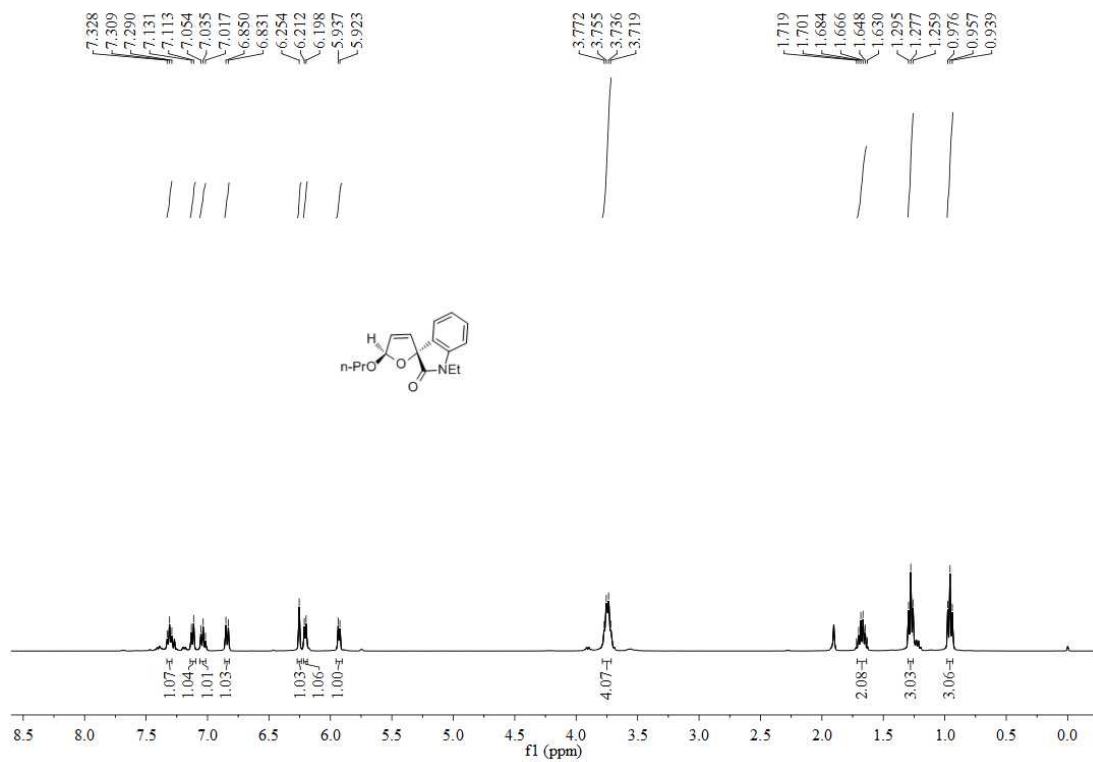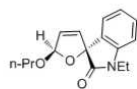

$^1\text{H}$  NMR spectrum of **13q**

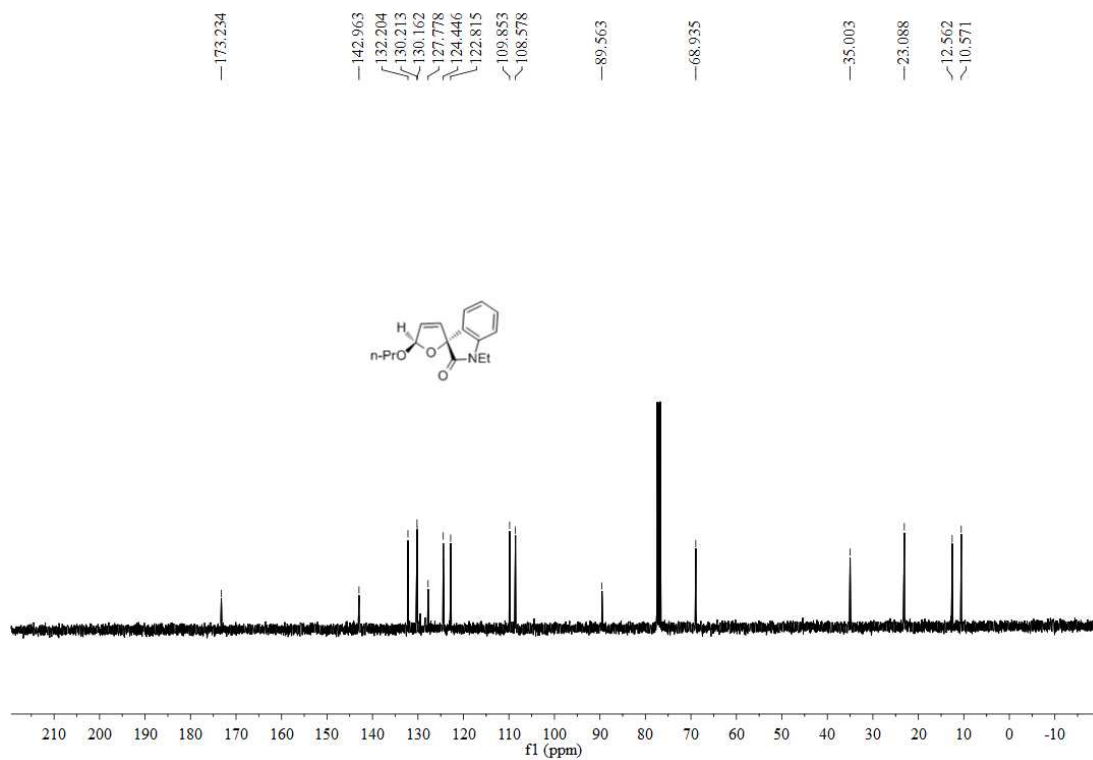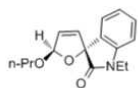

$^{13}\text{C}$  NMR spectrum of **13q**

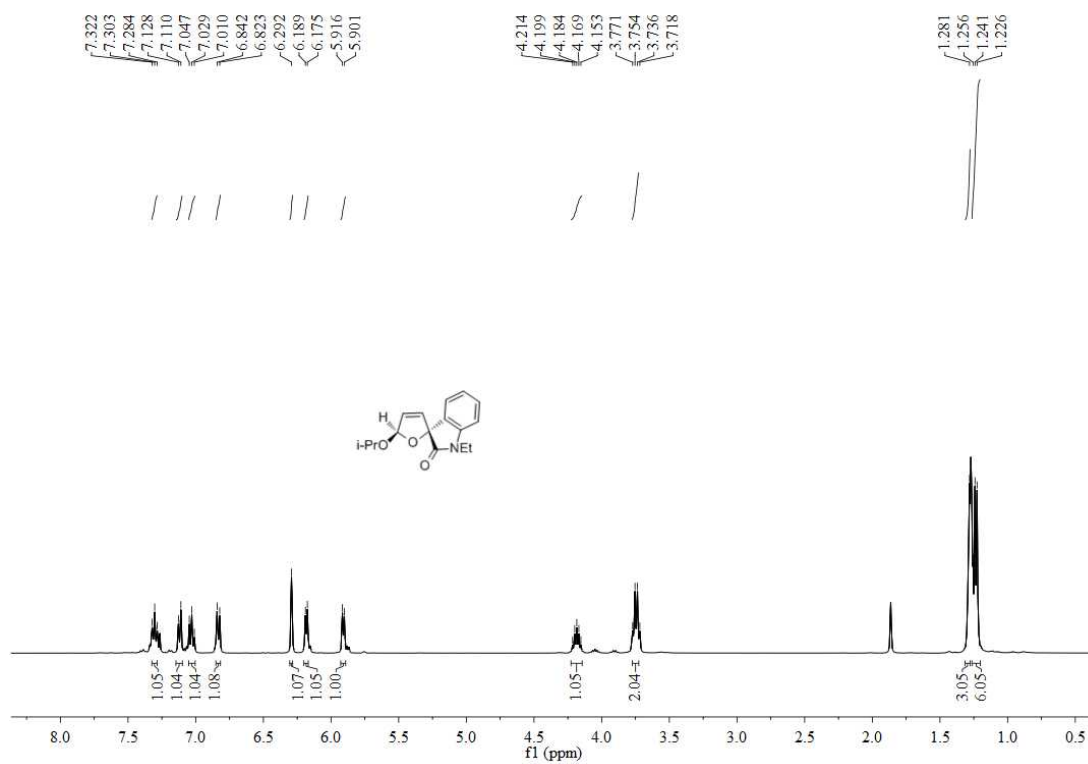

<sup>1</sup>H NMR spectrum of **13r**

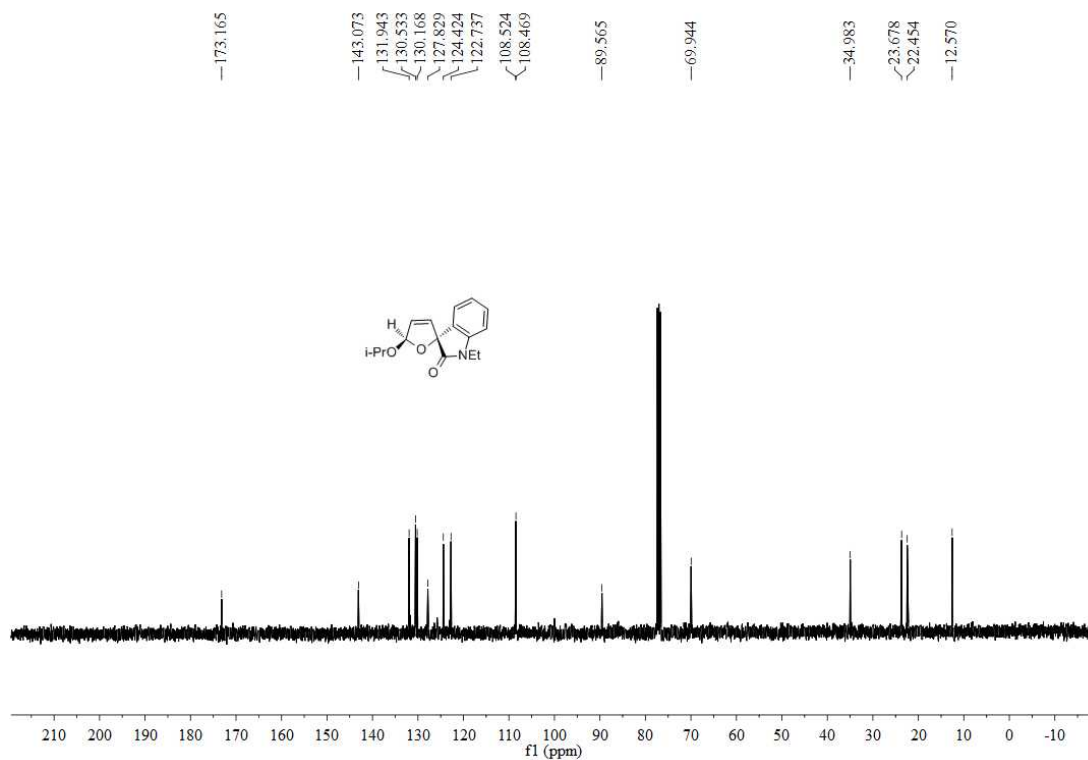

<sup>13</sup>C NMR spectrum of **13r**
